# Supplementary material for: Impacts of bromine and iodine chemistry on tropospheric OH and HO 2 : comparing observations with box and global model perspectives
Source: Copernicus journal article supplement (doi:10.5194/acp-18-3541-2018), 2018-03-12
Supplement: Supplementary file 2 [file acp-18-3541-2018-supplement.zip]

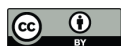

## *Supplement of*

# **Impacts of bromine and iodine chemistry on tropospheric OH and HO<sub>2</sub>: comparing observations with box and global model perspectives**

**Daniel Stone et al.**

*Correspondence to:* Daniel Stone ([d.stone@leeds.ac.uk](mailto:d.stone@leeds.ac.uk))

- [acp-18-3541-2018-supplement-title-page.pdf](#)
- [dstone\\_cvao\\_sos\\_supplementary\\_material](#)
  - [dstone\\_cvao\\_halogens\\_supplement.pdf](#)
  - [dstone\\_cvao\\_sos\\_kpp\\_files](#)
    - \* [dstone\\_cvao\\_sos\\_depos.kpp](#)
    - \* [dstone\\_cvao\\_sos\\_halogen.kpp](#)
    - \* [dstone\\_cvao\\_sos\\_inorganic.kpp](#)
    - \* [dstone\\_cvao\\_sos\\_organic.kpp](#)

The copyright of individual parts of the supplement might differ from the CC BY 4.0 License.
