# Supplementary material for: Impacts of bromine and iodine chemistry on tropospheric OH and HO 2 : comparing observations with box and global model perspectives
Source: Copernicus journal article supplement (doi:10.5194/acp-18-3541-2018), 2018-03-12
Supplement: Supplementary file 3 [file acp-18-3541-2018-supplement.zip]

Archive with 8 entries (6 files):
- dstone_cvao_sos_supplementary_material/
- dstone_cvao_sos_supplementary_material/dstone_cvao_sos_kpp_files/
- dstone_cvao_sos_supplementary_material/dstone_cvao_sos_kpp_files/dstone_cvao_sos_inorganic.kpp
- dstone_cvao_sos_supplementary_material/dstone_cvao_sos_kpp_files/dstone_cvao_sos_organic.kpp
- dstone_cvao_sos_supplementary_material/dstone_cvao_sos_kpp_files/dstone_cvao_sos_halogen.kpp
- dstone_cvao_sos_supplementary_material/dstone_cvao_sos_kpp_files/dstone_cvao_sos_depos.kpp
- dstone_cvao_sos_supplementary_material/dstone_cvao_halogens_supplement.pdf
- acp-18-3541-2018-supplement-title-page.pdf
