# Supplementary material for: Impacts of bromine and iodine chemistry on tropospheric OH and HO 2 : comparing observations with box and global model perspectives
Source: Copernicus journal article supplement (doi:10.5194/acp-18-3541-2018), 2018-03-12
Supplement: Supplementary file 3 [file acp-18-3541-2018-supplement.zip › dstone_cvao_sos_supplementary_material/dstone_cvao_sos_kpp_files/dstone_cvao_sos_depos.kpp]

#EQUATIONS
{1.} MALANHY  = DUMMY : 1E-5*EXP(0./TEMP) ;
{2.} IBUTALO2H  = DUMMY : 1E-5*EXP(0./TEMP) ;
{3.} HO1C3O  = DUMMY : 1E-5*EXP(0./TEMP) ;
{4.} C5DICARBO2  = DUMMY : 1E-5*EXP(0./TEMP) ;
{5.} H2M3C4OOH  = DUMMY : 1E-5*EXP(0./TEMP) ;
{6.} C4PAN6  = DUMMY : 1E-5*EXP(0./TEMP) ;
{7.} C4PAN1  = DUMMY : 1E-5*EXP(0./TEMP) ;
{8.} TBUTOLO  = DUMMY : 1E-5*EXP(0./TEMP) ;
{9.} ETHENO3O  = DUMMY : 1E-5*EXP(0./TEMP) ;
{10.} BUTALO2  = DUMMY : 1E-5*EXP(0./TEMP) ;
{11.} HEX3ONANO3  = DUMMY : 1E-5*EXP(0./TEMP) ;
{12.} HO1CO3CHO  = DUMMY : 1E-5*EXP(0./TEMP) ;
{13.} C5DIALO2  = DUMMY : 1E-5*EXP(0./TEMP) ;
{14.} CHOPRNO3  = DUMMY : 1E-5*EXP(0./TEMP) ;
{15.} C4PAN3  = DUMMY : 1E-5*EXP(0./TEMP) ;
{16.} CHOCOHCO  = DUMMY : 1E-5*EXP(0./TEMP) ;
{17.} MVKOHANO3  = DUMMY : 1E-5*EXP(0./TEMP) ;
{18.} HO2CO4C5O  = DUMMY : 1E-5*EXP(0./TEMP) ;
{19.} SC4H9NO3  = DUMMY : 1E-5*EXP(0./TEMP) ;
{20.} MNNCATECO2  = DUMMY : 1E-5*EXP(0./TEMP) ;
{21.} ISOPDOOH  = DUMMY : 1E-5*EXP(0./TEMP) ;
{22.} IPROPOL  = DUMMY : 1E-5*EXP(0./TEMP) ;
{23.} C6CO4DB  = DUMMY : 1E-5*EXP(0./TEMP) ;
{24.} BZEMUCO  = DUMMY : 1E-5*EXP(0./TEMP) ;
{25.} IBUTOLCNO3  = DUMMY : 1E-5*EXP(0./TEMP) ;
{26.} IPRHOCO2H  = DUMMY : 1E-5*EXP(0./TEMP) ;
{27.} ETHGLY  = DUMMY : 1E-5*EXP(0./TEMP) ;
{28.} CO14O3CO2H  = DUMMY : 1E-5*EXP(0./TEMP) ;
{29.} MACROH  = DUMMY : 1E-5*EXP(0./TEMP) ;
{30.} PROPALOOH  = DUMMY : 1E-5*EXP(0./TEMP) ;
{31.} MACROO  = DUMMY : 1E-5*EXP(0./TEMP) ;
{32.} C3MCODBPAN  = DUMMY : 1E-5*EXP(0./TEMP) ;
{33.} ETHO2HNO3  = DUMMY : 1E-5*EXP(0./TEMP) ;
{34.} NDNPHENO  = DUMMY : 1E-5*EXP(0./TEMP) ;
{35.} HMGLOOA  = DUMMY : 1E-5*EXP(0./TEMP) ;
{36.} C6CO34  = DUMMY : 1E-5*EXP(0./TEMP) ;
{37.} PROPALO2  = DUMMY : 1E-5*EXP(0./TEMP) ;
{38.} CO2C4CHO  = DUMMY : 1E-5*EXP(0./TEMP) ;
{39.} HM2C43O2  = DUMMY : 1E-5*EXP(0./TEMP) ;
{40.} C54OH  = DUMMY : 1E-5*EXP(0./TEMP) ;
{41.} M2BUOL2O  = DUMMY : 1E-5*EXP(0./TEMP) ;
{42.} HO3C5CO2H  = DUMMY : 1E-5*EXP(0./TEMP) ;
{43.} CO24C4CHO  = DUMMY : 1E-5*EXP(0./TEMP) ;
{44.} MEKAOOH  = DUMMY : 1E-5*EXP(0./TEMP) ;
{45.} NBZQO2  = DUMMY : 1E-5*EXP(0./TEMP) ;
{46.} HO3C5O  = DUMMY : 1E-5*EXP(0./TEMP) ;
{47.} C56O  = DUMMY : 1E-5*EXP(0./TEMP) ;
{48.} MACRO2  = DUMMY : 1E-5*EXP(0./TEMP) ;
{49.} HO2CO4C5O2  = DUMMY : 1E-5*EXP(0./TEMP) ;
{50.} BUTALO  = DUMMY : 1E-5*EXP(0./TEMP) ;
{51.} C2H5CHOO  = DUMMY : 1E-5*EXP(0./TEMP) ;
{52.} ACO3H  = DUMMY : 1E-5*EXP(0./TEMP) ;
{53.} BUT2OLAO  = DUMMY : 1E-5*EXP(0./TEMP) ;
{54.} NTLFUO2  = DUMMY : 1E-5*EXP(0./TEMP) ;
{55.} C4ME3HO23  = DUMMY : 1E-5*EXP(0./TEMP) ;
{56.} PEAOOH  = DUMMY : 1E-5*EXP(0./TEMP) ;
{57.} C5COO2NO2  = DUMMY : 1E-5*EXP(0./TEMP) ;
{58.} PROL11MNO3  = DUMMY : 1E-5*EXP(0./TEMP) ;
{59.} HEXBNO3  = DUMMY : 1E-5*EXP(0./TEMP) ;
{60.} C4H9CHO  = DUMMY : 1E-5*EXP(0./TEMP) ;
{61.} NBUTOL  = DUMMY : 1E-5*EXP(0./TEMP) ;
{62.} HEX2ONE  = DUMMY : 1E-5*EXP(0./TEMP) ;
{63.} C5DIALOH  = DUMMY : 1E-5*EXP(0./TEMP) ;
{64.} TLBIPER2OH  = DUMMY : 1E-5*EXP(0./TEMP) ;
{65.} HO1CO24C5  = DUMMY : 1E-5*EXP(0./TEMP) ;
{66.} ISOPAOOH  = DUMMY : 1E-5*EXP(0./TEMP) ;
{67.} IPROPOLO  = DUMMY : 1E-5*EXP(0./TEMP) ;
{68.} PROL1MCO3H  = DUMMY : 1E-5*EXP(0./TEMP) ;
{69.} HO1CO24C6  = DUMMY : 1E-5*EXP(0./TEMP) ;
{70.} HO1CO3C4O  = DUMMY : 1E-5*EXP(0./TEMP) ;
{71.} CO23C65OOH  = DUMMY : 1E-5*EXP(0./TEMP) ;
{72.} C6H5CH2OOH  = DUMMY : 1E-5*EXP(0./TEMP) ;
{73.} ISOPCOOH  = DUMMY : 1E-5*EXP(0./TEMP) ;
{74.} HYPERACET  = DUMMY : 1E-5*EXP(0./TEMP) ;
{75.} NBZFUOOH  = DUMMY : 1E-5*EXP(0./TEMP) ;
{76.} IPEBO  = DUMMY : 1E-5*EXP(0./TEMP) ;
{77.} MIPK  = DUMMY : 1E-5*EXP(0./TEMP) ;
{78.} HO2C6O  = DUMMY : 1E-5*EXP(0./TEMP) ;
{79.} C615CO2O  = DUMMY : 1E-5*EXP(0./TEMP) ;
{80.} DIEKBNO3  = DUMMY : 1E-5*EXP(0./TEMP) ;
{81.} PTLQONE  = DUMMY : 1E-5*EXP(0./TEMP) ;
{82.} CO3C4NO3O2  = DUMMY : 1E-5*EXP(0./TEMP) ;
{83.} HEXAO  = DUMMY : 1E-5*EXP(0./TEMP) ;
{84.} NPROPOL  = DUMMY : 1E-5*EXP(0./TEMP) ;
{85.} MMALANHYO2  = DUMMY : 1E-5*EXP(0./TEMP) ;
{86.} MEKAO  = DUMMY : 1E-5*EXP(0./TEMP) ;
{87.} C42CO3H  = DUMMY : 1E-5*EXP(0./TEMP) ;
{88.} NPXYFUO  = DUMMY : 1E-5*EXP(0./TEMP) ;
{89.} C6HO1CO3O  = DUMMY : 1E-5*EXP(0./TEMP) ;
{90.} HCOCH2CO2H  = DUMMY : 1E-5*EXP(0./TEMP) ;
{91.} NO2  = DUMMY : 1E-5*EXP(0./TEMP) ;
{92.} NO3  = DUMMY : 1E-5*EXP(0./TEMP) ;
{93.} HOCH2CO2H  = DUMMY : 1E-5*EXP(0./TEMP) ;
{94.} VGLYOX  = DUMMY : 1E-5*EXP(0./TEMP) ;
{95.} HEX2ONBNO3  = DUMMY : 1E-5*EXP(0./TEMP) ;
{96.} H2O2  = DUMMY : 1E-5*EXP(0./TEMP) ;
{97.} C58NO3  = DUMMY : 1E-5*EXP(0./TEMP) ;
{98.} IC4H9NO3  = DUMMY : 1E-5*EXP(0./TEMP) ;
{99.} IBUTOLCO2  = DUMMY : 1E-5*EXP(0./TEMP) ;
{100.} BUT2CO2H  = DUMMY : 1E-5*EXP(0./TEMP) ;
{101.} NCATECHOL  = DUMMY : 1E-5*EXP(0./TEMP) ;
{102.} CH3S  = DUMMY : 1E-5*EXP(0./TEMP) ;
{103.} C59O  = DUMMY : 1E-5*EXP(0./TEMP) ;
{104.} BU1ENO3O2  = DUMMY : 1E-5*EXP(0./TEMP) ;
{105.} NBZQO  = DUMMY : 1E-5*EXP(0./TEMP) ;
{106.} EPXDLCO2H  = DUMMY : 1E-5*EXP(0./TEMP) ;
{107.} NC5H12  = DUMMY : 1E-5*EXP(0./TEMP) ;
{108.} BZFUONOOA  = DUMMY : 1E-5*EXP(0./TEMP) ;
{109.} HEX3ONBO  = DUMMY : 1E-5*EXP(0./TEMP) ;
{110.} HMVKBO2  = DUMMY : 1E-5*EXP(0./TEMP) ;
{111.} MECOACETO  = DUMMY : 1E-5*EXP(0./TEMP) ;
{112.} M2BU2OLOOH  = DUMMY : 1E-5*EXP(0./TEMP) ;
{113.} PEBNO3  = DUMMY : 1E-5*EXP(0./TEMP) ;
{114.} HOC2H4CO2H  = DUMMY : 1E-5*EXP(0./TEMP) ;
{115.} TLBIPERO  = DUMMY : 1E-5*EXP(0./TEMP) ;
{116.} PRONO3AO2  = DUMMY : 1E-5*EXP(0./TEMP) ;
{117.} PEBO2  = DUMMY : 1E-5*EXP(0./TEMP) ;
{118.} MALDIAL  = DUMMY : 1E-5*EXP(0./TEMP) ;
{119.} HOIPRCO2H  = DUMMY : 1E-5*EXP(0./TEMP) ;
{120.} PEBOH  = DUMMY : 1E-5*EXP(0./TEMP) ;
{121.} C6HO1CO3O2  = DUMMY : 1E-5*EXP(0./TEMP) ;
{122.} HO2C4OOH  = DUMMY : 1E-5*EXP(0./TEMP) ;
{123.} C3COCCO3H  = DUMMY : 1E-5*EXP(0./TEMP) ;
{124.} IBUTOLBO2H  = DUMMY : 1E-5*EXP(0./TEMP) ;
{125.} NPXYFUOOH  = DUMMY : 1E-5*EXP(0./TEMP) ;
{126.} PROPACID  = DUMMY : 1E-5*EXP(0./TEMP) ;
{127.} C3COCCO3  = DUMMY : 1E-5*EXP(0./TEMP) ;
{128.} IBUTOLBO2  = DUMMY : 1E-5*EXP(0./TEMP) ;
{129.} DMSO2O2  = DUMMY : 1E-5*EXP(0./TEMP) ;
{130.} HO2C4OH  = DUMMY : 1E-5*EXP(0./TEMP) ;
{131.} CO2H3CO3H  = DUMMY : 1E-5*EXP(0./TEMP) ;
{132.} CH3CHO  = DUMMY : 1E-5*EXP(0./TEMP) ;
{133.} NC3H7O  = DUMMY : 1E-5*EXP(0./TEMP) ;
{134.} MALANHYOOH  = DUMMY : 1E-5*EXP(0./TEMP) ;
{135.} BENZENE  = DUMMY : 1E-5*EXP(0./TEMP) ;
{136.} NC3H7NO3  = DUMMY : 1E-5*EXP(0./TEMP) ;
{137.} C63OH  = DUMMY : 1E-5*EXP(0./TEMP) ;
{138.} IC3H7O2  = DUMMY : 1E-5*EXP(0./TEMP) ;
{139.} PRONO3BO  = DUMMY : 1E-5*EXP(0./TEMP) ;
{140.} C3DIALO  = DUMMY : 1E-5*EXP(0./TEMP) ;
{141.} HOCO3C54O2  = DUMMY : 1E-5*EXP(0./TEMP) ;
{142.} MPRK  = DUMMY : 1E-5*EXP(0./TEMP) ;
{143.} NOA  = DUMMY : 1E-5*EXP(0./TEMP) ;
{144.} TLBIPERNO3  = DUMMY : 1E-5*EXP(0./TEMP) ;
{145.} BIACETOOH  = DUMMY : 1E-5*EXP(0./TEMP) ;
{146.} ISOPBOOH  = DUMMY : 1E-5*EXP(0./TEMP) ;
{147.} C61O2  = DUMMY : 1E-5*EXP(0./TEMP) ;
{148.} CO3C4NO3OH  = DUMMY : 1E-5*EXP(0./TEMP) ;
{149.} C54O2  = DUMMY : 1E-5*EXP(0./TEMP) ;
{150.} TBUTOLNO3  = DUMMY : 1E-5*EXP(0./TEMP) ;
{151.} C56OH  = DUMMY : 1E-5*EXP(0./TEMP) ;
{152.} IPROPOLO2H  = DUMMY : 1E-5*EXP(0./TEMP) ;
{153.} MACROOA  = DUMMY : 1E-5*EXP(0./TEMP) ;
{154.} MACROOH  = DUMMY : 1E-5*EXP(0./TEMP) ;
{155.} HEX3ONBO2  = DUMMY : 1E-5*EXP(0./TEMP) ;
{156.} H2M2C3CHO  = DUMMY : 1E-5*EXP(0./TEMP) ;
{157.} HEX3ONCOOH  = DUMMY : 1E-5*EXP(0./TEMP) ;
{158.} NCRESO  = DUMMY : 1E-5*EXP(0./TEMP) ;
{159.} COC4NO3OOH  = DUMMY : 1E-5*EXP(0./TEMP) ;
{160.} PBZQO2  = DUMMY : 1E-5*EXP(0./TEMP) ;
{161.} PHXN  = DUMMY : 1E-5*EXP(0./TEMP) ;
{162.} HO3C6NO3  = DUMMY : 1E-5*EXP(0./TEMP) ;
{163.} C63NO3  = DUMMY : 1E-5*EXP(0./TEMP) ;
{164.} C5DICARBO  = DUMMY : 1E-5*EXP(0./TEMP) ;
{165.} CO2C5OH  = DUMMY : 1E-5*EXP(0./TEMP) ;
{166.} MIPKAOOH  = DUMMY : 1E-5*EXP(0./TEMP) ;
{167.} PBN  = DUMMY : 1E-5*EXP(0./TEMP) ;
{168.} TBUTOLOOH  = DUMMY : 1E-5*EXP(0./TEMP) ;
{169.} MALDIALO  = DUMMY : 1E-5*EXP(0./TEMP) ;
{170.} NCRESO2  = DUMMY : 1E-5*EXP(0./TEMP) ;
{171.} CO35C5CHO  = DUMMY : 1E-5*EXP(0./TEMP) ;
{172.} NPTLQO  = DUMMY : 1E-5*EXP(0./TEMP) ;
{173.} HO3C6OOH  = DUMMY : 1E-5*EXP(0./TEMP) ;
{174.} PHAN  = DUMMY : 1E-5*EXP(0./TEMP) ;
{175.} C5CO23OOH  = DUMMY : 1E-5*EXP(0./TEMP) ;
{176.} HO3C3CHO  = DUMMY : 1E-5*EXP(0./TEMP) ;
{177.} ACO2H  = DUMMY : 1E-5*EXP(0./TEMP) ;
{178.} CH3SO2O2  = DUMMY : 1E-5*EXP(0./TEMP) ;
{179.} PBZQONE  = DUMMY : 1E-5*EXP(0./TEMP) ;
{180.} BUT2OL  = DUMMY : 1E-5*EXP(0./TEMP) ;
{181.} MCATEC1O  = DUMMY : 1E-5*EXP(0./TEMP) ;
{182.} MACO2H  = DUMMY : 1E-5*EXP(0./TEMP) ;
{183.} NNCATECO2  = DUMMY : 1E-5*EXP(0./TEMP) ;
{184.} HO1C3OOH  = DUMMY : 1E-5*EXP(0./TEMP) ;
{185.} PERPENACID  = DUMMY : 1E-5*EXP(0./TEMP) ;
{186.} C33CO  = DUMMY : 1E-5*EXP(0./TEMP) ;
{187.} C7CO4DB  = DUMMY : 1E-5*EXP(0./TEMP) ;
{188.} TC4H9O  = DUMMY : 1E-5*EXP(0./TEMP) ;
{189.} PHCOOH  = DUMMY : 1E-5*EXP(0./TEMP) ;
{190.} HOIPRCO3H  = DUMMY : 1E-5*EXP(0./TEMP) ;
{191.} MGLOOA  = DUMMY : 1E-5*EXP(0./TEMP) ;
{192.} MGLOOB  = DUMMY : 1E-5*EXP(0./TEMP) ;
{193.} ACRPAN  = DUMMY : 1E-5*EXP(0./TEMP) ;
{194.} C4H9CO3  = DUMMY : 1E-5*EXP(0./TEMP) ;
{195.} NCRESOH  = DUMMY : 1E-5*EXP(0./TEMP) ;
{196.} PEN2ONE1O2  = DUMMY : 1E-5*EXP(0./TEMP) ;
{197.} MMALANHY  = DUMMY : 1E-5*EXP(0./TEMP) ;
{198.} ISOPCNO3  = DUMMY : 1E-5*EXP(0./TEMP) ;
{199.} C52O  = DUMMY : 1E-5*EXP(0./TEMP) ;
{200.} MVK  = DUMMY : 1E-5*EXP(0./TEMP) ;
{201.} IC3H7O  = DUMMY : 1E-5*EXP(0./TEMP) ;
{202.} SC4H9O2  = DUMMY : 1E-5*EXP(0./TEMP) ;
{203.} HMVKBOOH  = DUMMY : 1E-5*EXP(0./TEMP) ;
{204.} C510O2  = DUMMY : 1E-5*EXP(0./TEMP) ;
{205.} C61OOH  = DUMMY : 1E-5*EXP(0./TEMP) ;
{206.} IPRHOCO3H  = DUMMY : 1E-5*EXP(0./TEMP) ;
{207.} HOC4H8OH  = DUMMY : 1E-5*EXP(0./TEMP) ;
{208.} CO23C54O  = DUMMY : 1E-5*EXP(0./TEMP) ;
{209.} HM2C43NO3  = DUMMY : 1E-5*EXP(0./TEMP) ;
{210.} C51OOH  = DUMMY : 1E-5*EXP(0./TEMP) ;
{211.} HO1C6OOH  = DUMMY : 1E-5*EXP(0./TEMP) ;
{212.} H2M3C4O2  = DUMMY : 1E-5*EXP(0./TEMP) ;
{213.} DNCRESOOH  = DUMMY : 1E-5*EXP(0./TEMP) ;
{214.} HEX3ONBOOH  = DUMMY : 1E-5*EXP(0./TEMP) ;
{215.} HO2CO3C4O  = DUMMY : 1E-5*EXP(0./TEMP) ;
{216.} HO2M2C4OOH  = DUMMY : 1E-5*EXP(0./TEMP) ;
{217.} CRESOOH  = DUMMY : 1E-5*EXP(0./TEMP) ;
{218.} C5CO2DBPAN  = DUMMY : 1E-5*EXP(0./TEMP) ;
{219.} HEX2ONAOOH  = DUMMY : 1E-5*EXP(0./TEMP) ;
{220.} HOIBUTCO3  = DUMMY : 1E-5*EXP(0./TEMP) ;
{221.} HOCH2CHO  = DUMMY : 1E-5*EXP(0./TEMP) ;
{222.} C61OH  = DUMMY : 1E-5*EXP(0./TEMP) ;
{223.} ISOPANO3  = DUMMY : 1E-5*EXP(0./TEMP) ;
{224.} PRNO3CO3H  = DUMMY : 1E-5*EXP(0./TEMP) ;
{225.} C5CO2DCO3H  = DUMMY : 1E-5*EXP(0./TEMP) ;
{226.} C5CO34CO3  = DUMMY : 1E-5*EXP(0./TEMP) ;
{227.} EPXDLPAN  = DUMMY : 1E-5*EXP(0./TEMP) ;
{228.} C6H5CH2NO3  = DUMMY : 1E-5*EXP(0./TEMP) ;
{229.} C3H7CHO  = DUMMY : 1E-5*EXP(0./TEMP) ;
{230.} C6CO2OHPAN  = DUMMY : 1E-5*EXP(0./TEMP) ;
{231.} TLEMUCCO  = DUMMY : 1E-5*EXP(0./TEMP) ;
{232.} NPHENO  = DUMMY : 1E-5*EXP(0./TEMP) ;
{233.} CH3SOOOH  = DUMMY : 1E-5*EXP(0./TEMP) ;
{234.} HO13C5  = DUMMY : 1E-5*EXP(0./TEMP) ;
{235.} EPXDLCO3H  = DUMMY : 1E-5*EXP(0./TEMP) ;
{236.} NDNCRESOOH  = DUMMY : 1E-5*EXP(0./TEMP) ;
{237.} C3MCODBCO3  = DUMMY : 1E-5*EXP(0./TEMP) ;
{238.} PRONO3AO  = DUMMY : 1E-5*EXP(0./TEMP) ;
{239.} PRNO3PAN  = DUMMY : 1E-5*EXP(0./TEMP) ;
{240.} IBUTOLOHC  = DUMMY : 1E-5*EXP(0./TEMP) ;
{241.} IBUTOLOHB  = DUMMY : 1E-5*EXP(0./TEMP) ;
{242.} CO14O3CHO  = DUMMY : 1E-5*EXP(0./TEMP) ;
{243.} HOIPRCO3  = DUMMY : 1E-5*EXP(0./TEMP) ;
{244.} PEANO3  = DUMMY : 1E-5*EXP(0./TEMP) ;
{245.} HO1CO4C6  = DUMMY : 1E-5*EXP(0./TEMP) ;
{246.} HYPROPO2H  = DUMMY : 1E-5*EXP(0./TEMP) ;
{247.} ISOPAO  = DUMMY : 1E-5*EXP(0./TEMP) ;
{248.} C3DIOLO  = DUMMY : 1E-5*EXP(0./TEMP) ;
{249.} TLOBIPEROH  = DUMMY : 1E-5*EXP(0./TEMP) ;
{250.} MIPKBOH  = DUMMY : 1E-5*EXP(0./TEMP) ;
{251.} C3MCODBCO2  = DUMMY : 1E-5*EXP(0./TEMP) ;
{252.} NC4MDCO2  = DUMMY : 1E-5*EXP(0./TEMP) ;
{253.} CH3SO2CHO  = DUMMY : 1E-5*EXP(0./TEMP) ;
{254.} IPRHOCO3  = DUMMY : 1E-5*EXP(0./TEMP) ;
{255.} HO1C6O  = DUMMY : 1E-5*EXP(0./TEMP) ;
{256.} MACRO  = DUMMY : 1E-5*EXP(0./TEMP) ;
{257.} HC4CCO3H  = DUMMY : 1E-5*EXP(0./TEMP) ;
{258.} MIPKBO2  = DUMMY : 1E-5*EXP(0./TEMP) ;
{259.} MGLYOOB  = DUMMY : 1E-5*EXP(0./TEMP) ;
{260.} HO13C4OOH  = DUMMY : 1E-5*EXP(0./TEMP) ;
{261.} MGLYOOA  = DUMMY : 1E-5*EXP(0./TEMP) ;
{262.} PECOOH  = DUMMY : 1E-5*EXP(0./TEMP) ;
{263.} TBUTOLO2  = DUMMY : 1E-5*EXP(0./TEMP) ;
{264.} H2M2C3CO3H  = DUMMY : 1E-5*EXP(0./TEMP) ;
{265.} EPXDLCO3  = DUMMY : 1E-5*EXP(0./TEMP) ;
{266.} C6H5OOH  = DUMMY : 1E-5*EXP(0./TEMP) ;
{267.} CH3CHOO  = DUMMY : 1E-5*EXP(0./TEMP) ;
{268.} HO13CO4C5  = DUMMY : 1E-5*EXP(0./TEMP) ;
{269.} CO2C3PAN  = DUMMY : 1E-5*EXP(0./TEMP) ;
{270.} MALDIALOOH  = DUMMY : 1E-5*EXP(0./TEMP) ;
{271.} H13C43CO3  = DUMMY : 1E-5*EXP(0./TEMP) ;
{272.} C62O  = DUMMY : 1E-5*EXP(0./TEMP) ;
{273.} NPXYFUO2  = DUMMY : 1E-5*EXP(0./TEMP) ;
{274.} CH3O2NO2  = DUMMY : 1E-5*EXP(0./TEMP) ;
{275.} HEX3ONCOH  = DUMMY : 1E-5*EXP(0./TEMP) ;
{276.} ISOPDNO3  = DUMMY : 1E-5*EXP(0./TEMP) ;
{277.} HEX3ONAOOH  = DUMMY : 1E-5*EXP(0./TEMP) ;
{278.} OXYL1OOH  = DUMMY : 1E-5*EXP(0./TEMP) ;
{279.} CO3C5CHO  = DUMMY : 1E-5*EXP(0./TEMP) ;
{280.} C62O2  = DUMMY : 1E-5*EXP(0./TEMP) ;
{281.} C23O3CCO2H  = DUMMY : 1E-5*EXP(0./TEMP) ;
{282.} IBUTALOH  = DUMMY : 1E-5*EXP(0./TEMP) ;
{283.} C32OH13CO  = DUMMY : 1E-5*EXP(0./TEMP) ;
{284.} DMSO  = DUMMY : 1E-5*EXP(0./TEMP) ;
{285.} CH3CO3H  = DUMMY : 1E-5*EXP(0./TEMP) ;
{286.} DIEKBO  = DUMMY : 1E-5*EXP(0./TEMP) ;
{287.} HEXCOH  = DUMMY : 1E-5*EXP(0./TEMP) ;
{288.} C57O  = DUMMY : 1E-5*EXP(0./TEMP) ;
{289.} HO3C5CO3H  = DUMMY : 1E-5*EXP(0./TEMP) ;
{290.} CO3C5CO3H  = DUMMY : 1E-5*EXP(0./TEMP) ;
{291.} MVKOHAO  = DUMMY : 1E-5*EXP(0./TEMP) ;
{292.} NC4H9O  = DUMMY : 1E-5*EXP(0./TEMP) ;
{293.} HO3C4O  = DUMMY : 1E-5*EXP(0./TEMP) ;
{294.} HO134C5  = DUMMY : 1E-5*EXP(0./TEMP) ;
{295.} DIEKAOH  = DUMMY : 1E-5*EXP(0./TEMP) ;
{296.} C6H5CO3H  = DUMMY : 1E-5*EXP(0./TEMP) ;
{297.} BZEMUCNO3  = DUMMY : 1E-5*EXP(0./TEMP) ;
{298.} ISOPBNO3  = DUMMY : 1E-5*EXP(0./TEMP) ;
{299.} CH3CHOOA  = DUMMY : 1E-5*EXP(0./TEMP) ;
{300.} ME2BUOLO  = DUMMY : 1E-5*EXP(0./TEMP) ;
{301.} PTLQOH  = DUMMY : 1E-5*EXP(0./TEMP) ;
{302.} CH3CHOOB  = DUMMY : 1E-5*EXP(0./TEMP) ;
{303.} C2H5CHOOA  = DUMMY : 1E-5*EXP(0./TEMP) ;
{304.} C4CHOBO2  = DUMMY : 1E-5*EXP(0./TEMP) ;
{305.} HOC6H4NO2  = DUMMY : 1E-5*EXP(0./TEMP) ;
{306.} BZFUO  = DUMMY : 1E-5*EXP(0./TEMP) ;
{307.} C5PAN9  = DUMMY : 1E-5*EXP(0./TEMP) ;
{308.} C5PAN8  = DUMMY : 1E-5*EXP(0./TEMP) ;
{309.} NBUTOLAO  = DUMMY : 1E-5*EXP(0./TEMP) ;
{310.} HEX3ONDOOH  = DUMMY : 1E-5*EXP(0./TEMP) ;
{311.} C5PAN5  = DUMMY : 1E-5*EXP(0./TEMP) ;
{312.} C5PAN4  = DUMMY : 1E-5*EXP(0./TEMP) ;
{313.} HO13C5OOH  = DUMMY : 1E-5*EXP(0./TEMP) ;
{314.} MALDIALCO2  = DUMMY : 1E-5*EXP(0./TEMP) ;
{315.} C5PAN3  = DUMMY : 1E-5*EXP(0./TEMP) ;
{316.} HEXAOH  = DUMMY : 1E-5*EXP(0./TEMP) ;
{317.} BUTAL2O  = DUMMY : 1E-5*EXP(0./TEMP) ;
{318.} HC4ACHO  = DUMMY : 1E-5*EXP(0./TEMP) ;
{319.} CH4  = DUMMY : 1E-5*EXP(0./TEMP) ;
{320.} HOIPRCHO  = DUMMY : 1E-5*EXP(0./TEMP) ;
{321.} IC4H10  = DUMMY : 1E-5*EXP(0./TEMP) ;
{322.} NC4CO3  = DUMMY : 1E-5*EXP(0./TEMP) ;
{323.} HO2C5O2  = DUMMY : 1E-5*EXP(0./TEMP) ;
{324.} HCOCH2O2  = DUMMY : 1E-5*EXP(0./TEMP) ;
{325.} HO2C5OH  = DUMMY : 1E-5*EXP(0./TEMP) ;
{326.} H13CO2CO3  = DUMMY : 1E-5*EXP(0./TEMP) ;
{327.} NC3H7OOH  = DUMMY : 1E-5*EXP(0./TEMP) ;
{328.} HEX2ONCO  = DUMMY : 1E-5*EXP(0./TEMP) ;
{329.} TLEMUCNO3  = DUMMY : 1E-5*EXP(0./TEMP) ;
{330.} ACLOO  = DUMMY : 1E-5*EXP(0./TEMP) ;
{331.} CO25C6O  = DUMMY : 1E-5*EXP(0./TEMP) ;
{332.} HOCH2COCO2H  = DUMMY : 1E-5*EXP(0./TEMP) ;
{333.} C2H5O  = DUMMY : 1E-5*EXP(0./TEMP) ;
{334.} HCOCH2CO3  = DUMMY : 1E-5*EXP(0./TEMP) ;
{335.} HEXAO2  = DUMMY : 1E-5*EXP(0./TEMP) ;
{336.} HEX2ONBOOH  = DUMMY : 1E-5*EXP(0./TEMP) ;
{337.} PEBOOH  = DUMMY : 1E-5*EXP(0./TEMP) ;
{338.} MC3CODBCO3  = DUMMY : 1E-5*EXP(0./TEMP) ;
{339.} TLFUONOOA  = DUMMY : 1E-5*EXP(0./TEMP) ;
{340.} OXYL1O2  = DUMMY : 1E-5*EXP(0./TEMP) ;
{341.} PTLQO2  = DUMMY : 1E-5*EXP(0./TEMP) ;
{342.} HO2CO4C5  = DUMMY : 1E-5*EXP(0./TEMP) ;
{343.} IC4H9OOH  = DUMMY : 1E-5*EXP(0./TEMP) ;
{344.} BZBIPERNO3  = DUMMY : 1E-5*EXP(0./TEMP) ;
{345.} MIPKBNO3  = DUMMY : 1E-5*EXP(0./TEMP) ;
{346.} DIEKAO2  = DUMMY : 1E-5*EXP(0./TEMP) ;
{347.} PXYFUO  = DUMMY : 1E-5*EXP(0./TEMP) ;
{348.} PROPALO  = DUMMY : 1E-5*EXP(0./TEMP) ;
{349.} C5DIALOOH  = DUMMY : 1E-5*EXP(0./TEMP) ;
{350.} DIEKAOOH  = DUMMY : 1E-5*EXP(0./TEMP) ;
{351.} PRONO3BO2  = DUMMY : 1E-5*EXP(0./TEMP) ;
{352.} HCOOH  = DUMMY : 1E-5*EXP(0./TEMP) ;
{353.} NPTLQOOH  = DUMMY : 1E-5*EXP(0./TEMP) ;
{354.} PXYFUO2  = DUMMY : 1E-5*EXP(0./TEMP) ;
{355.} HCOCO2H  = DUMMY : 1E-5*EXP(0./TEMP) ;
{356.} BZFUONE  = DUMMY : 1E-5*EXP(0./TEMP) ;
{357.} ETHENO3O2  = DUMMY : 1E-5*EXP(0./TEMP) ;
{358.} C43NO34O2  = DUMMY : 1E-5*EXP(0./TEMP) ;
{359.} HEXCO2  = DUMMY : 1E-5*EXP(0./TEMP) ;
{360.} MACROHONO2  = DUMMY : 1E-5*EXP(0./TEMP) ;
{361.} MACROHONO3  = DUMMY : 1E-5*EXP(0./TEMP) ;
{362.} HCHO  = DUMMY : 1E-5*EXP(0./TEMP) ;
{363.} HMVKAO2  = DUMMY : 1E-5*EXP(0./TEMP) ;
{364.} NC4DCO2  = DUMMY : 1E-5*EXP(0./TEMP) ;
{365.} CH3COCO3  = DUMMY : 1E-5*EXP(0./TEMP) ;
{366.} HEX3ONCO2  = DUMMY : 1E-5*EXP(0./TEMP) ;
{367.} MEKCOH  = DUMMY : 1E-5*EXP(0./TEMP) ;
{368.} C5CO23CHO  = DUMMY : 1E-5*EXP(0./TEMP) ;
{369.} BU1ENO3OOH  = DUMMY : 1E-5*EXP(0./TEMP) ;
{370.} HEX3ONAO2  = DUMMY : 1E-5*EXP(0./TEMP) ;
{371.} PEAO  = DUMMY : 1E-5*EXP(0./TEMP) ;
{372.} PBZQO  = DUMMY : 1E-5*EXP(0./TEMP) ;
{373.} NCRES1O  = DUMMY : 1E-5*EXP(0./TEMP) ;
{374.} H13CO2CO3H  = DUMMY : 1E-5*EXP(0./TEMP) ;
{375.} IPRCHO  = DUMMY : 1E-5*EXP(0./TEMP) ;
{376.} MALDALCO3H  = DUMMY : 1E-5*EXP(0./TEMP) ;
{377.} CO23C5  = DUMMY : 1E-5*EXP(0./TEMP) ;
{378.} CO23C6  = DUMMY : 1E-5*EXP(0./TEMP) ;
{379.} HEX3ONDOH  = DUMMY : 1E-5*EXP(0./TEMP) ;
{380.} TOL1O  = DUMMY : 1E-5*EXP(0./TEMP) ;
{381.} CATECHOL  = DUMMY : 1E-5*EXP(0./TEMP) ;
{382.} CH3SOO2  = DUMMY : 1E-5*EXP(0./TEMP) ;
{383.} IBUTOL  = DUMMY : 1E-5*EXP(0./TEMP) ;
{384.} IPROPOLPER  = DUMMY : 1E-5*EXP(0./TEMP) ;
{385.} DNCRESO  = DUMMY : 1E-5*EXP(0./TEMP) ;
{386.} HO1C4NO3  = DUMMY : 1E-5*EXP(0./TEMP) ;
{387.} C4MDIAL  = DUMMY : 1E-5*EXP(0./TEMP) ;
{388.} C4M2AL2OH  = DUMMY : 1E-5*EXP(0./TEMP) ;
{389.} MIPKBO  = DUMMY : 1E-5*EXP(0./TEMP) ;
{390.} C61O  = DUMMY : 1E-5*EXP(0./TEMP) ;
{391.} PENTACID  = DUMMY : 1E-5*EXP(0./TEMP) ;
{392.} C4CO2DBPAN  = DUMMY : 1E-5*EXP(0./TEMP) ;
{393.} HO1C3NO3  = DUMMY : 1E-5*EXP(0./TEMP) ;
{394.} ALLYLOH  = DUMMY : 1E-5*EXP(0./TEMP) ;
{395.} BU1ENO3O  = DUMMY : 1E-5*EXP(0./TEMP) ;
{396.} M2BUOL2OH  = DUMMY : 1E-5*EXP(0./TEMP) ;
{397.} C6CO3OHOOH  = DUMMY : 1E-5*EXP(0./TEMP) ;
{398.} C5DICAROOH  = DUMMY : 1E-5*EXP(0./TEMP) ;
{399.} HOCH2CO3  = DUMMY : 1E-5*EXP(0./TEMP) ;
{400.} TBUTOL  = DUMMY : 1E-5*EXP(0./TEMP) ;
{401.} CRESO  = DUMMY : 1E-5*EXP(0./TEMP) ;
{402.} MC3CODBPAN  = DUMMY : 1E-5*EXP(0./TEMP) ;
{403.} CO24C6OOH  = DUMMY : 1E-5*EXP(0./TEMP) ;
{404.} CH2OOG  = DUMMY : 1E-5*EXP(0./TEMP) ;
{405.} CH2OOE  = DUMMY : 1E-5*EXP(0./TEMP) ;
{406.} MEKAO2  = DUMMY : 1E-5*EXP(0./TEMP) ;
{407.} CH2OOC  = DUMMY : 1E-5*EXP(0./TEMP) ;
{408.} CH2OOB  = DUMMY : 1E-5*EXP(0./TEMP) ;
{409.} CH2OOA  = DUMMY : 1E-5*EXP(0./TEMP) ;
{410.} CH3O  = DUMMY : 1E-5*EXP(0./TEMP) ;
{411.} C23O3CCO3  = DUMMY : 1E-5*EXP(0./TEMP) ;
{412.} C510OH  = DUMMY : 1E-5*EXP(0./TEMP) ;
{413.} NPHENO2  = DUMMY : 1E-5*EXP(0./TEMP) ;
{414.} HOBUT2CHO  = DUMMY : 1E-5*EXP(0./TEMP) ;
{415.} CO23C4CO3H  = DUMMY : 1E-5*EXP(0./TEMP) ;
{416.} HEX3ONDO2  = DUMMY : 1E-5*EXP(0./TEMP) ;
{417.} HO3C5CHO  = DUMMY : 1E-5*EXP(0./TEMP) ;
{418.} PROL11MO2  = DUMMY : 1E-5*EXP(0./TEMP) ;
{419.} HO2C6O2  = DUMMY : 1E-5*EXP(0./TEMP) ;
{420.} HEX3ONAOH  = DUMMY : 1E-5*EXP(0./TEMP) ;
{421.} MVKOHAOH  = DUMMY : 1E-5*EXP(0./TEMP) ;
{422.} MALANHYO2  = DUMMY : 1E-5*EXP(0./TEMP) ;
{423.} HO2C6OOH  = DUMMY : 1E-5*EXP(0./TEMP) ;
{424.} C63OOH  = DUMMY : 1E-5*EXP(0./TEMP) ;
{425.} HO1C5O  = DUMMY : 1E-5*EXP(0./TEMP) ;
{426.} TLEMUCCO3  = DUMMY : 1E-5*EXP(0./TEMP) ;
{427.} C514CO23OH  = DUMMY : 1E-5*EXP(0./TEMP) ;
{428.} DIEKBOOH  = DUMMY : 1E-5*EXP(0./TEMP) ;
{429.} ISOPDO2  = DUMMY : 1E-5*EXP(0./TEMP) ;
{430.} C510O  = DUMMY : 1E-5*EXP(0./TEMP) ;
{431.} CH3OOH  = DUMMY : 1E-5*EXP(0./TEMP) ;
{432.} BUT2OLO  = DUMMY : 1E-5*EXP(0./TEMP) ;
{433.} MEKCO2  = DUMMY : 1E-5*EXP(0./TEMP) ;
{434.} NCRES1OOH  = DUMMY : 1E-5*EXP(0./TEMP) ;
{435.} C3COCPAN  = DUMMY : 1E-5*EXP(0./TEMP) ;
{436.} CO2C4CO2H  = DUMMY : 1E-5*EXP(0./TEMP) ;
{437.} H2M2C3CO3  = DUMMY : 1E-5*EXP(0./TEMP) ;
{438.} PROPGLY  = DUMMY : 1E-5*EXP(0./TEMP) ;
{439.} NBZFUO2  = DUMMY : 1E-5*EXP(0./TEMP) ;
{440.} TOL1OHNO2  = DUMMY : 1E-5*EXP(0./TEMP) ;
{441.} BZEMUCCO2H  = DUMMY : 1E-5*EXP(0./TEMP) ;
{442.} CO24C53OOH  = DUMMY : 1E-5*EXP(0./TEMP) ;
{443.} NO3CH2CO3  = DUMMY : 1E-5*EXP(0./TEMP) ;
{444.} NC4CHO  = DUMMY : 1E-5*EXP(0./TEMP) ;
{445.} CO2HOC6OOH  = DUMMY : 1E-5*EXP(0./TEMP) ;
{446.} C6CO3HO25  = DUMMY : 1E-5*EXP(0./TEMP) ;
{447.} NC4CO2H  = DUMMY : 1E-5*EXP(0./TEMP) ;
{448.} HO2C4CO3H  = DUMMY : 1E-5*EXP(0./TEMP) ;
{449.} MC3ODBCO2H  = DUMMY : 1E-5*EXP(0./TEMP) ;
{450.} C5PAN13  = DUMMY : 1E-5*EXP(0./TEMP) ;
{451.} C54NO3  = DUMMY : 1E-5*EXP(0./TEMP) ;
{452.} CH3SOO  = DUMMY : 1E-5*EXP(0./TEMP) ;
{453.} C53O  = DUMMY : 1E-5*EXP(0./TEMP) ;
{454.} MIPKAOH  = DUMMY : 1E-5*EXP(0./TEMP) ;
{455.} CO25C6O2  = DUMMY : 1E-5*EXP(0./TEMP) ;
{456.} CH3CHOHCHO  = DUMMY : 1E-5*EXP(0./TEMP) ;
{457.} C43NO34O  = DUMMY : 1E-5*EXP(0./TEMP) ;
{458.} NISOPNO3  = DUMMY : 1E-5*EXP(0./TEMP) ;
{459.} M2BUOL2OOH  = DUMMY : 1E-5*EXP(0./TEMP) ;
{460.} HO1C4O2  = DUMMY : 1E-5*EXP(0./TEMP) ;
{461.} MVKOHBO2  = DUMMY : 1E-5*EXP(0./TEMP) ;
{462.} MGLOO  = DUMMY : 1E-5*EXP(0./TEMP) ;
{463.} TLEMUCCO2H  = DUMMY : 1E-5*EXP(0./TEMP) ;
{464.} BUTACID  = DUMMY : 1E-5*EXP(0./TEMP) ;
{465.} PE2ONE1OOH  = DUMMY : 1E-5*EXP(0./TEMP) ;
{466.} HC4ACO3  = DUMMY : 1E-5*EXP(0./TEMP) ;
{467.} PHENOH  = DUMMY : 1E-5*EXP(0./TEMP) ;
{468.} C62OOH  = DUMMY : 1E-5*EXP(0./TEMP) ;
{469.} PHENOL  = DUMMY : 1E-5*EXP(0./TEMP) ;
{470.} NC4H9OOH  = DUMMY : 1E-5*EXP(0./TEMP) ;
{471.} MVKOHAOOH  = DUMMY : 1E-5*EXP(0./TEMP) ;
{472.} TLFUONOO  = DUMMY : 1E-5*EXP(0./TEMP) ;
{473.} HOCO3C54O  = DUMMY : 1E-5*EXP(0./TEMP) ;
{474.} MGLYOO  = DUMMY : 1E-5*EXP(0./TEMP) ;
{475.} CO23C4CO3  = DUMMY : 1E-5*EXP(0./TEMP) ;
{476.} MACROHOOH  = DUMMY : 1E-5*EXP(0./TEMP) ;
{477.} H13C43CO3H  = DUMMY : 1E-5*EXP(0./TEMP) ;
{478.} IPECO  = DUMMY : 1E-5*EXP(0./TEMP) ;
{479.} PHENO2  = DUMMY : 1E-5*EXP(0./TEMP) ;
{480.} C4CHOBNO3  = DUMMY : 1E-5*EXP(0./TEMP) ;
{481.} C6CO3HO14  = DUMMY : 1E-5*EXP(0./TEMP) ;
{482.} CO2H3CHO  = DUMMY : 1E-5*EXP(0./TEMP) ;
{483.} CATECOOA  = DUMMY : 1E-5*EXP(0./TEMP) ;
{484.} MMALNHYOOH  = DUMMY : 1E-5*EXP(0./TEMP) ;
{485.} C4PAN5  = DUMMY : 1E-5*EXP(0./TEMP) ;
{486.} NC4H9O2  = DUMMY : 1E-5*EXP(0./TEMP) ;
{487.} MGLYOX  = DUMMY : 1E-5*EXP(0./TEMP) ;
{488.} BZFUO2  = DUMMY : 1E-5*EXP(0./TEMP) ;
{489.} HODMSO2  = DUMMY : 1E-5*EXP(0./TEMP) ;
{490.} MIPKAO2  = DUMMY : 1E-5*EXP(0./TEMP) ;
{491.} CO25C6OH  = DUMMY : 1E-5*EXP(0./TEMP) ;
{492.} C24O3CCO2H  = DUMMY : 1E-5*EXP(0./TEMP) ;
{493.} MVKOHAO2  = DUMMY : 1E-5*EXP(0./TEMP) ;
{494.} PTLQOOH  = DUMMY : 1E-5*EXP(0./TEMP) ;
{495.} HC4CCHO  = DUMMY : 1E-5*EXP(0./TEMP) ;
{496.} MALDIALPAN  = DUMMY : 1E-5*EXP(0./TEMP) ;
{497.} BUT2CO3  = DUMMY : 1E-5*EXP(0./TEMP) ;
{498.} CH3SO2  = DUMMY : 1E-5*EXP(0./TEMP) ;
{499.} CH3SO3  = DUMMY : 1E-5*EXP(0./TEMP) ;
{500.} C51OH  = DUMMY : 1E-5*EXP(0./TEMP) ;
{501.} PROL1MCHO  = DUMMY : 1E-5*EXP(0./TEMP) ;
{502.} NPHENOOH  = DUMMY : 1E-5*EXP(0./TEMP) ;
{503.} CO23C65O  = DUMMY : 1E-5*EXP(0./TEMP) ;
{504.} HEX3ONAO  = DUMMY : 1E-5*EXP(0./TEMP) ;
{505.} C6H5O  = DUMMY : 1E-5*EXP(0./TEMP) ;
{506.} MNNCATCOOH  = DUMMY : 1E-5*EXP(0./TEMP) ;
{507.} NPHEN1OOH  = DUMMY : 1E-5*EXP(0./TEMP) ;
{508.} ISOPDO  = DUMMY : 1E-5*EXP(0./TEMP) ;
{509.} IBUTOLCO  = DUMMY : 1E-5*EXP(0./TEMP) ;
{510.} HO1C3O2  = DUMMY : 1E-5*EXP(0./TEMP) ;
{511.} HCOC5  = DUMMY : 1E-5*EXP(0./TEMP) ;
{512.} HO2C43CO2H  = DUMMY : 1E-5*EXP(0./TEMP) ;
{513.} MCATEC1OOH  = DUMMY : 1E-5*EXP(0./TEMP) ;
{514.} C2H5CHO  = DUMMY : 1E-5*EXP(0./TEMP) ;
{515.} C53OH  = DUMMY : 1E-5*EXP(0./TEMP) ;
{516.} HEXBOH  = DUMMY : 1E-5*EXP(0./TEMP) ;
{517.} C6COOHCO3H  = DUMMY : 1E-5*EXP(0./TEMP) ;
{518.} DMSO2  = DUMMY : 1E-5*EXP(0./TEMP) ;
{519.} HEX2ONCOOH  = DUMMY : 1E-5*EXP(0./TEMP) ;
{520.} SC4H9O  = DUMMY : 1E-5*EXP(0./TEMP) ;
{521.} HEX3ONE  = DUMMY : 1E-5*EXP(0./TEMP) ;
{522.} GAOO  = DUMMY : 1E-5*EXP(0./TEMP) ;
{523.} PRPAL2CO2H  = DUMMY : 1E-5*EXP(0./TEMP) ;
{524.} BZBIPEROOH  = DUMMY : 1E-5*EXP(0./TEMP) ;
{525.} BZEMUCO2  = DUMMY : 1E-5*EXP(0./TEMP) ;
{526.} C5CO2OHCO3  = DUMMY : 1E-5*EXP(0./TEMP) ;
{527.} BUT2OLNO3  = DUMMY : 1E-5*EXP(0./TEMP) ;
{528.} HO13C4OH  = DUMMY : 1E-5*EXP(0./TEMP) ;
{529.} ACCOMEPAN  = DUMMY : 1E-5*EXP(0./TEMP) ;
{530.} HMGLOO  = DUMMY : 1E-5*EXP(0./TEMP) ;
{531.} C23O3CPAN  = DUMMY : 1E-5*EXP(0./TEMP) ;
{532.} CH3COCO2H  = DUMMY : 1E-5*EXP(0./TEMP) ;
{533.} C57O2  = DUMMY : 1E-5*EXP(0./TEMP) ;
{534.} BUT2OLOH  = DUMMY : 1E-5*EXP(0./TEMP) ;
{535.} CO2C54O  = DUMMY : 1E-5*EXP(0./TEMP) ;
{536.} TLFUO2  = DUMMY : 1E-5*EXP(0./TEMP) ;
{537.} NOAOOA  = DUMMY : 1E-5*EXP(0./TEMP) ;
{538.} C2OHOCOOH  = DUMMY : 1E-5*EXP(0./TEMP) ;
{539.} HOHOC4DIAL  = DUMMY : 1E-5*EXP(0./TEMP) ;
{540.} C56NO3  = DUMMY : 1E-5*EXP(0./TEMP) ;
{541.} HO3C4NO3  = DUMMY : 1E-5*EXP(0./TEMP) ;
{542.} TLEMUCCO3H  = DUMMY : 1E-5*EXP(0./TEMP) ;
{543.} TLEMUCOOH  = DUMMY : 1E-5*EXP(0./TEMP) ;
{544.} OCCOHCOH  = DUMMY : 1E-5*EXP(0./TEMP) ;
{545.} C51O2  = DUMMY : 1E-5*EXP(0./TEMP) ;
{546.} PE2ENEBO  = DUMMY : 1E-5*EXP(0./TEMP) ;
{547.} C6125CO  = DUMMY : 1E-5*EXP(0./TEMP) ;
{548.} IBUALANO3  = DUMMY : 1E-5*EXP(0./TEMP) ;
{549.} BZFUOH  = DUMMY : 1E-5*EXP(0./TEMP) ;
{550.} CO3C5CO3  = DUMMY : 1E-5*EXP(0./TEMP) ;
{551.} MPRKAO2  = DUMMY : 1E-5*EXP(0./TEMP) ;
{552.} C5PAN7  = DUMMY : 1E-5*EXP(0./TEMP) ;
{553.} C510OOH  = DUMMY : 1E-5*EXP(0./TEMP) ;
{554.} MPRKAOH  = DUMMY : 1E-5*EXP(0./TEMP) ;
{555.} NC6H14  = DUMMY : 1E-5*EXP(0./TEMP) ;
{556.} C5H8  = DUMMY : 1E-5*EXP(0./TEMP) ;
{557.} C5CO2OHPAN  = DUMMY : 1E-5*EXP(0./TEMP) ;
{558.} C3PAN1  = DUMMY : 1E-5*EXP(0./TEMP) ;
{559.} C54O  = DUMMY : 1E-5*EXP(0./TEMP) ;
{560.} MACROHO  = DUMMY : 1E-5*EXP(0./TEMP) ;
{561.} HO2C4O2  = DUMMY : 1E-5*EXP(0./TEMP) ;
{562.} C59O2  = DUMMY : 1E-5*EXP(0./TEMP) ;
{563.} ACETOL  = DUMMY : 1E-5*EXP(0./TEMP) ;
{564.} CH3C2H5O2  = DUMMY : 1E-5*EXP(0./TEMP) ;
{565.} IPROPOLO2  = DUMMY : 1E-5*EXP(0./TEMP) ;
{566.} A2PAN  = DUMMY : 1E-5*EXP(0./TEMP) ;
{567.} CH3CO3  = DUMMY : 1E-5*EXP(0./TEMP) ;
{568.} HO13C5NO3  = DUMMY : 1E-5*EXP(0./TEMP) ;
{569.} C58OOH  = DUMMY : 1E-5*EXP(0./TEMP) ;
{570.} HCOCOHCO3  = DUMMY : 1E-5*EXP(0./TEMP) ;
{571.} MC3ODBCO3H  = DUMMY : 1E-5*EXP(0./TEMP) ;
{572.} NBUTOLBOOH  = DUMMY : 1E-5*EXP(0./TEMP) ;
{573.} DIEKBO2  = DUMMY : 1E-5*EXP(0./TEMP) ;
{574.} NBUTOLBO  = DUMMY : 1E-5*EXP(0./TEMP) ;
{575.} HO13C3CO3H  = DUMMY : 1E-5*EXP(0./TEMP) ;
{576.} BZEMUCOOH  = DUMMY : 1E-5*EXP(0./TEMP) ;
{577.} BUTALNO3  = DUMMY : 1E-5*EXP(0./TEMP) ;
{578.} NC4CO3H  = DUMMY : 1E-5*EXP(0./TEMP) ;
{579.} BZEMUCCO3  = DUMMY : 1E-5*EXP(0./TEMP) ;
{580.} GLYPAN  = DUMMY : 1E-5*EXP(0./TEMP) ;
{581.} TLFUOOH  = DUMMY : 1E-5*EXP(0./TEMP) ;
{582.} HEX2ONAO2  = DUMMY : 1E-5*EXP(0./TEMP) ;
{583.} C23O3CHO  = DUMMY : 1E-5*EXP(0./TEMP) ;
{584.} BZEMUCOH  = DUMMY : 1E-5*EXP(0./TEMP) ;
{585.} HEXBO2  = DUMMY : 1E-5*EXP(0./TEMP) ;
{586.} HO13C5O2  = DUMMY : 1E-5*EXP(0./TEMP) ;
{587.} C5CO14CO2  = DUMMY : 1E-5*EXP(0./TEMP) ;
{588.} ME2BUOLOOH  = DUMMY : 1E-5*EXP(0./TEMP) ;
{589.} DMSO2OH  = DUMMY : 1E-5*EXP(0./TEMP) ;
{590.} C53O2  = DUMMY : 1E-5*EXP(0./TEMP) ;
{591.} CH3COCH2O2  = DUMMY : 1E-5*EXP(0./TEMP) ;
{592.} MACO3H  = DUMMY : 1E-5*EXP(0./TEMP) ;
{593.} HO1C5NO3  = DUMMY : 1E-5*EXP(0./TEMP) ;
{594.} C6CO3HO4  = DUMMY : 1E-5*EXP(0./TEMP) ;
{595.} HMVKBO  = DUMMY : 1E-5*EXP(0./TEMP) ;
{596.} CO23C65O2  = DUMMY : 1E-5*EXP(0./TEMP) ;
{597.} HO2C3CO3  = DUMMY : 1E-5*EXP(0./TEMP) ;
{598.} GAOOB  = DUMMY : 1E-5*EXP(0./TEMP) ;
{599.} MEKCO  = DUMMY : 1E-5*EXP(0./TEMP) ;
{600.} HOCO3C4OOH  = DUMMY : 1E-5*EXP(0./TEMP) ;
{601.} CH3NO3  = DUMMY : 1E-5*EXP(0./TEMP) ;
{602.} MALDALCO2H  = DUMMY : 1E-5*EXP(0./TEMP) ;
{603.} ISOPAOH  = DUMMY : 1E-5*EXP(0./TEMP) ;
{604.} NPHEN1O  = DUMMY : 1E-5*EXP(0./TEMP) ;
{605.} HO13C5O  = DUMMY : 1E-5*EXP(0./TEMP) ;
{606.} HMVKANO3  = DUMMY : 1E-5*EXP(0./TEMP) ;
{607.} CO2HO4C6  = DUMMY : 1E-5*EXP(0./TEMP) ;
{608.} PHENOOH  = DUMMY : 1E-5*EXP(0./TEMP) ;
{609.} MEKAOH  = DUMMY : 1E-5*EXP(0./TEMP) ;
{610.} CH3COPAN  = DUMMY : 1E-5*EXP(0./TEMP) ;
{611.} HO1CO3C5  = DUMMY : 1E-5*EXP(0./TEMP) ;
{612.} MACROHO2  = DUMMY : 1E-5*EXP(0./TEMP) ;
{613.} PAN  = DUMMY : 1E-5*EXP(0./TEMP) ;
{614.} HOCOC4DIAL  = DUMMY : 1E-5*EXP(0./TEMP) ;
{615.} BIACET  = DUMMY : 1E-5*EXP(0./TEMP) ;
{616.} DMSO2O  = DUMMY : 1E-5*EXP(0./TEMP) ;
{617.} HYPROPO  = DUMMY : 1E-5*EXP(0./TEMP) ;
{618.} MALANHY2OH  = DUMMY : 1E-5*EXP(0./TEMP) ;
{619.} BZEMUCCO3H  = DUMMY : 1E-5*EXP(0./TEMP) ;
{620.} H13CO2CHO  = DUMMY : 1E-5*EXP(0./TEMP) ;
{621.} ACO3B  = DUMMY : 1E-5*EXP(0./TEMP) ;
{622.} HCOCO3H  = DUMMY : 1E-5*EXP(0./TEMP) ;
{623.} HC4CCO2H  = DUMMY : 1E-5*EXP(0./TEMP) ;
{624.} HO2C4CHO  = DUMMY : 1E-5*EXP(0./TEMP) ;
{625.} NDNPHENOOH  = DUMMY : 1E-5*EXP(0./TEMP) ;
{626.} BZFUOOH  = DUMMY : 1E-5*EXP(0./TEMP) ;
{627.} PROL11MO  = DUMMY : 1E-5*EXP(0./TEMP) ;
{628.} PERPROACID  = DUMMY : 1E-5*EXP(0./TEMP) ;
{629.} MNCATECOOH  = DUMMY : 1E-5*EXP(0./TEMP) ;
{630.} HO2C43CHO  = DUMMY : 1E-5*EXP(0./TEMP) ;
{631.} ISOPCO2  = DUMMY : 1E-5*EXP(0./TEMP) ;
{632.} ME2BUOLO2  = DUMMY : 1E-5*EXP(0./TEMP) ;
{633.} BZEMUCPAN  = DUMMY : 1E-5*EXP(0./TEMP) ;
{634.} BZFUCO  = DUMMY : 1E-5*EXP(0./TEMP) ;
{635.} IPROPOLPAN  = DUMMY : 1E-5*EXP(0./TEMP) ;
{636.} HNO3  = DUMMY : 1E-5*EXP(0./TEMP) ;
{637.} HO2C43CO3H  = DUMMY : 1E-5*EXP(0./TEMP) ;
{638.} HYETHO2H  = DUMMY : 1E-5*EXP(0./TEMP) ;
{639.} NCATECO  = DUMMY : 1E-5*EXP(0./TEMP) ;
{640.} C5PAN2  = DUMMY : 1E-5*EXP(0./TEMP) ;
{641.} C5H11CO3H  = DUMMY : 1E-5*EXP(0./TEMP) ;
{642.} CO2HOC61O2  = DUMMY : 1E-5*EXP(0./TEMP) ;
{643.} MPRKBOOH  = DUMMY : 1E-5*EXP(0./TEMP) ;
{644.} MALDIALCO3  = DUMMY : 1E-5*EXP(0./TEMP) ;
{645.} ETHOHNO3  = DUMMY : 1E-5*EXP(0./TEMP) ;
{646.} GLYOO  = DUMMY : 1E-5*EXP(0./TEMP) ;
{647.} PPEN  = DUMMY : 1E-5*EXP(0./TEMP) ;
{648.} C6CO34O2  = DUMMY : 1E-5*EXP(0./TEMP) ;
{649.} HO13C3CHO  = DUMMY : 1E-5*EXP(0./TEMP) ;
{650.} ISOPAO2  = DUMMY : 1E-5*EXP(0./TEMP) ;
{651.} HOCHOCOOH  = DUMMY : 1E-5*EXP(0./TEMP) ;
{652.} NC4H10  = DUMMY : 1E-5*EXP(0./TEMP) ;
{653.} BZFUONOO  = DUMMY : 1E-5*EXP(0./TEMP) ;
{654.} IC4H9O  = DUMMY : 1E-5*EXP(0./TEMP) ;
{655.} A2PANOO  = DUMMY : 1E-5*EXP(0./TEMP) ;
{656.} MEKBO2  = DUMMY : 1E-5*EXP(0./TEMP) ;
{657.} HOIBUTCHO  = DUMMY : 1E-5*EXP(0./TEMP) ;
{658.} GLYOX  = DUMMY : 1E-5*EXP(0./TEMP) ;
{659.} HO2C43CO3  = DUMMY : 1E-5*EXP(0./TEMP) ;
{660.} HC4CCO3  = DUMMY : 1E-5*EXP(0./TEMP) ;
{661.} HO13C3CO3  = DUMMY : 1E-5*EXP(0./TEMP) ;
{662.} C3COCCHO  = DUMMY : 1E-5*EXP(0./TEMP) ;
{663.} C3H6  = DUMMY : 1E-5*EXP(0./TEMP) ;
{664.} IPEBOH  = DUMMY : 1E-5*EXP(0./TEMP) ;
{665.} C54CO  = DUMMY : 1E-5*EXP(0./TEMP) ;
{666.} CO25C6  = DUMMY : 1E-5*EXP(0./TEMP) ;
{667.} C57OH  = DUMMY : 1E-5*EXP(0./TEMP) ;
{668.} PROL1MCO3  = DUMMY : 1E-5*EXP(0./TEMP) ;
{669.} CRESOH  = DUMMY : 1E-5*EXP(0./TEMP) ;
{670.} C523OH  = DUMMY : 1E-5*EXP(0./TEMP) ;
{671.} C5H11CO3  = DUMMY : 1E-5*EXP(0./TEMP) ;
{672.} CRESOL  = DUMMY : 1E-5*EXP(0./TEMP) ;
{673.} C53OOH  = DUMMY : 1E-5*EXP(0./TEMP) ;
{674.} C3H8  = DUMMY : 1E-5*EXP(0./TEMP) ;
{675.} MECOACEOOH  = DUMMY : 1E-5*EXP(0./TEMP) ;
{676.} HO1C5O2  = DUMMY : 1E-5*EXP(0./TEMP) ;
{677.} DMS  = DUMMY : 1E-5*EXP(0./TEMP) ;
{678.} TC4H9NO3  = DUMMY : 1E-5*EXP(0./TEMP) ;
{679.} HO2M2C4O  = DUMMY : 1E-5*EXP(0./TEMP) ;
{680.} CO23C4NO3  = DUMMY : 1E-5*EXP(0./TEMP) ;
{681.} C57OOH  = DUMMY : 1E-5*EXP(0./TEMP) ;
{682.} C6CO134PAN  = DUMMY : 1E-5*EXP(0./TEMP) ;
{683.} MCATECOOA  = DUMMY : 1E-5*EXP(0./TEMP) ;
{684.} PBZQCO  = DUMMY : 1E-5*EXP(0./TEMP) ;
{685.} CH2OO  = DUMMY : 1E-5*EXP(0./TEMP) ;
{686.} CH3SO2OOH  = DUMMY : 1E-5*EXP(0./TEMP) ;
{687.} HOBUT2CO3  = DUMMY : 1E-5*EXP(0./TEMP) ;
{688.} CH3CHOHCO3  = DUMMY : 1E-5*EXP(0./TEMP) ;
{689.} C23O3CCHO  = DUMMY : 1E-5*EXP(0./TEMP) ;
{690.} HO3C4O2  = DUMMY : 1E-5*EXP(0./TEMP) ;
{691.} C6CO3OH5O  = DUMMY : 1E-5*EXP(0./TEMP) ;
{692.} CO3C4CO2H  = DUMMY : 1E-5*EXP(0./TEMP) ;
{693.} BZEPOXMUC  = DUMMY : 1E-5*EXP(0./TEMP) ;
{694.} C3DIALOOH  = DUMMY : 1E-5*EXP(0./TEMP) ;
{695.} HO1C4O  = DUMMY : 1E-5*EXP(0./TEMP) ;
{696.} CH3SCH2OOH  = DUMMY : 1E-5*EXP(0./TEMP) ;
{697.} C5CO14O2  = DUMMY : 1E-5*EXP(0./TEMP) ;
{698.} C3DIALO2  = DUMMY : 1E-5*EXP(0./TEMP) ;
{699.} HO14CO3C5  = DUMMY : 1E-5*EXP(0./TEMP) ;
{700.} CH3COCH2O  = DUMMY : 1E-5*EXP(0./TEMP) ;
{701.} MPRKNO3  = DUMMY : 1E-5*EXP(0./TEMP) ;
{702.} NBUTOLANO3  = DUMMY : 1E-5*EXP(0./TEMP) ;
{703.} C5PAN19  = DUMMY : 1E-5*EXP(0./TEMP) ;
{704.} C5PAN18  = DUMMY : 1E-5*EXP(0./TEMP) ;
{705.} CO23C54OOH  = DUMMY : 1E-5*EXP(0./TEMP) ;
{706.} PXYFUOOH  = DUMMY : 1E-5*EXP(0./TEMP) ;
{707.} C5PAN11  = DUMMY : 1E-5*EXP(0./TEMP) ;
{708.} CO2C43CHO  = DUMMY : 1E-5*EXP(0./TEMP) ;
{709.} HO2C4CO2H  = DUMMY : 1E-5*EXP(0./TEMP) ;
{710.} C5PAN12  = DUMMY : 1E-5*EXP(0./TEMP) ;
{711.} C5CO14OH  = DUMMY : 1E-5*EXP(0./TEMP) ;
{712.} C5PAN14  = DUMMY : 1E-5*EXP(0./TEMP) ;
{713.} C5PAN17  = DUMMY : 1E-5*EXP(0./TEMP) ;
{714.} C5PAN16  = DUMMY : 1E-5*EXP(0./TEMP) ;
{715.} PHENO  = DUMMY : 1E-5*EXP(0./TEMP) ;
{716.} HOC3H6CO3H  = DUMMY : 1E-5*EXP(0./TEMP) ;
{717.} PTLQCO  = DUMMY : 1E-5*EXP(0./TEMP) ;
{718.} C6CO34O  = DUMMY : 1E-5*EXP(0./TEMP) ;
{719.} C2H6  = DUMMY : 1E-5*EXP(0./TEMP) ;
{720.} C2H4  = DUMMY : 1E-5*EXP(0./TEMP) ;
{721.} IBUTDIAL  = DUMMY : 1E-5*EXP(0./TEMP) ;
{722.} C2H2  = DUMMY : 1E-5*EXP(0./TEMP) ;
{723.} CO23C4CHO  = DUMMY : 1E-5*EXP(0./TEMP) ;
{724.} HO1C6O2  = DUMMY : 1E-5*EXP(0./TEMP) ;
{725.} TLBIPERO2  = DUMMY : 1E-5*EXP(0./TEMP) ;
{726.} C6CO2OHCO3  = DUMMY : 1E-5*EXP(0./TEMP) ;
{727.} HO3C3PAN  = DUMMY : 1E-5*EXP(0./TEMP) ;
{728.} NISOPOOH  = DUMMY : 1E-5*EXP(0./TEMP) ;
{729.} C54OOH  = DUMMY : 1E-5*EXP(0./TEMP) ;
{730.} HO3C4CO3  = DUMMY : 1E-5*EXP(0./TEMP) ;
{731.} HO14CO2C5  = DUMMY : 1E-5*EXP(0./TEMP) ;
{732.} CRESO2  = DUMMY : 1E-5*EXP(0./TEMP) ;
{733.} HO3C4OOH  = DUMMY : 1E-5*EXP(0./TEMP) ;
{734.} CH3SO4NO2  = DUMMY : 1E-5*EXP(0./TEMP) ;
{735.} CO2C54O2  = DUMMY : 1E-5*EXP(0./TEMP) ;
{736.} HCOCH2O  = DUMMY : 1E-5*EXP(0./TEMP) ;
{737.} IPEBO2  = DUMMY : 1E-5*EXP(0./TEMP) ;
{738.} BZEMUCCO  = DUMMY : 1E-5*EXP(0./TEMP) ;
{739.} CO2HO3C6  = DUMMY : 1E-5*EXP(0./TEMP) ;
{740.} IBUDIALCO3  = DUMMY : 1E-5*EXP(0./TEMP) ;
{741.} HEXCO  = DUMMY : 1E-5*EXP(0./TEMP) ;
{742.} C41CO3  = DUMMY : 1E-5*EXP(0./TEMP) ;
{743.} HO13M2C4  = DUMMY : 1E-5*EXP(0./TEMP) ;
{744.} ME2BUOLNO3  = DUMMY : 1E-5*EXP(0./TEMP) ;
{745.} C52OOH  = DUMMY : 1E-5*EXP(0./TEMP) ;
{746.} C5CO23O  = DUMMY : 1E-5*EXP(0./TEMP) ;
{747.} C5PAN1  = DUMMY : 1E-5*EXP(0./TEMP) ;
{748.} C6CO34HO1  = DUMMY : 1E-5*EXP(0./TEMP) ;
{749.} NBZFUO  = DUMMY : 1E-5*EXP(0./TEMP) ;
{750.} C4CHOBO  = DUMMY : 1E-5*EXP(0./TEMP) ;
{751.} CO3C4CHO  = DUMMY : 1E-5*EXP(0./TEMP) ;
{752.} IC3H7OOH  = DUMMY : 1E-5*EXP(0./TEMP) ;
{753.} HO1C4OOH  = DUMMY : 1E-5*EXP(0./TEMP) ;
{754.} HO13C4NO3  = DUMMY : 1E-5*EXP(0./TEMP) ;
{755.} C6H5O2  = DUMMY : 1E-5*EXP(0./TEMP) ;
{756.} NBUTOLBNO3  = DUMMY : 1E-5*EXP(0./TEMP) ;
{757.} HOCH2COCHO  = DUMMY : 1E-5*EXP(0./TEMP) ;
{758.} IBUTACID  = DUMMY : 1E-5*EXP(0./TEMP) ;
{759.} NTLFUO  = DUMMY : 1E-5*EXP(0./TEMP) ;
{760.} BIACETO  = DUMMY : 1E-5*EXP(0./TEMP) ;
{761.} BUTALO2H  = DUMMY : 1E-5*EXP(0./TEMP) ;
{762.} PEBO  = DUMMY : 1E-5*EXP(0./TEMP) ;
{763.} C56O2  = DUMMY : 1E-5*EXP(0./TEMP) ;
{764.} H1CO23CHO  = DUMMY : 1E-5*EXP(0./TEMP) ;
{765.} C41CO2H  = DUMMY : 1E-5*EXP(0./TEMP) ;
{766.} C3DIOLO2  = DUMMY : 1E-5*EXP(0./TEMP) ;
{767.} NO3CH2CHO  = DUMMY : 1E-5*EXP(0./TEMP) ;
{768.} HEX2ONANO3  = DUMMY : 1E-5*EXP(0./TEMP) ;
{769.} NMGLYOX  = DUMMY : 1E-5*EXP(0./TEMP) ;
{770.} NC4H9NO3  = DUMMY : 1E-5*EXP(0./TEMP) ;
{771.} NC3H7O2  = DUMMY : 1E-5*EXP(0./TEMP) ;
{772.} HEX2ONAO  = DUMMY : 1E-5*EXP(0./TEMP) ;
{773.} ISOPCO  = DUMMY : 1E-5*EXP(0./TEMP) ;
{774.} CO2C4CO3H  = DUMMY : 1E-5*EXP(0./TEMP) ;
{775.} NO3CH2CO2H  = DUMMY : 1E-5*EXP(0./TEMP) ;
{776.} CO  = DUMMY : 1E-5*EXP(0./TEMP) ;
{777.} PGLYOX  = DUMMY : 1E-5*EXP(0./TEMP) ;
{778.} PBZQOH  = DUMMY : 1E-5*EXP(0./TEMP) ;
{779.} CL  = DUMMY : 1E-5*EXP(0./TEMP) ;
{780.} C5CO14OOH  = DUMMY : 1E-5*EXP(0./TEMP) ;
{781.} HOIBUTCO3H  = DUMMY : 1E-5*EXP(0./TEMP) ;
{782.} HO3C3CO3H  = DUMMY : 1E-5*EXP(0./TEMP) ;
{783.} MEKCOOH  = DUMMY : 1E-5*EXP(0./TEMP) ;
{784.} HCOCO3  = DUMMY : 1E-5*EXP(0./TEMP) ;
{785.} HOCH2CH2O  = DUMMY : 1E-5*EXP(0./TEMP) ;
{786.} HOBUT2CO3H  = DUMMY : 1E-5*EXP(0./TEMP) ;
{787.} MCATECHOL  = DUMMY : 1E-5*EXP(0./TEMP) ;
{788.} C52O2  = DUMMY : 1E-5*EXP(0./TEMP) ;
{789.} C42AOH  = DUMMY : 1E-5*EXP(0./TEMP) ;
{790.} M2PROPAL2O  = DUMMY : 1E-5*EXP(0./TEMP) ;
{791.} MIPKAO  = DUMMY : 1E-5*EXP(0./TEMP) ;
{792.} CO3C4CO3H  = DUMMY : 1E-5*EXP(0./TEMP) ;
{793.} C51NO3  = DUMMY : 1E-5*EXP(0./TEMP) ;
{794.} HC4ACO2H  = DUMMY : 1E-5*EXP(0./TEMP) ;
{795.} C53OH2OOH  = DUMMY : 1E-5*EXP(0./TEMP) ;
{796.} M2BUOL2NO3  = DUMMY : 1E-5*EXP(0./TEMP) ;
{797.} C42CO3  = DUMMY : 1E-5*EXP(0./TEMP) ;
{798.} BZBIPERO  = DUMMY : 1E-5*EXP(0./TEMP) ;
{799.} HO3C5OOH  = DUMMY : 1E-5*EXP(0./TEMP) ;
{800.} HOC3H6OH  = DUMMY : 1E-5*EXP(0./TEMP) ;
{801.} EPXC4DIAL  = DUMMY : 1E-5*EXP(0./TEMP) ;
{802.} MECOACETO2  = DUMMY : 1E-5*EXP(0./TEMP) ;
{803.} PXYFUOH  = DUMMY : 1E-5*EXP(0./TEMP) ;
{804.} HO14CO2C4  = DUMMY : 1E-5*EXP(0./TEMP) ;
{805.} CH3SCHO  = DUMMY : 1E-5*EXP(0./TEMP) ;
{806.} BUT2OLO2  = DUMMY : 1E-5*EXP(0./TEMP) ;
{807.} DNPHENO2  = DUMMY : 1E-5*EXP(0./TEMP) ;
{808.} HO3C5CO3  = DUMMY : 1E-5*EXP(0./TEMP) ;
{809.} M2BU2OLNO3  = DUMMY : 1E-5*EXP(0./TEMP) ;
{810.} MVKO  = DUMMY : 1E-5*EXP(0./TEMP) ;
{811.} CH3SCH2O  = DUMMY : 1E-5*EXP(0./TEMP) ;
{812.} TC4H9O2  = DUMMY : 1E-5*EXP(0./TEMP) ;
{813.} HO2C3CO2H  = DUMMY : 1E-5*EXP(0./TEMP) ;
{814.} HCOCH2OOH  = DUMMY : 1E-5*EXP(0./TEMP) ;
{815.} MCOCOMOOOH  = DUMMY : 1E-5*EXP(0./TEMP) ;
{816.} CO2C3CO3H  = DUMMY : 1E-5*EXP(0./TEMP) ;
{817.} NDNCRESO  = DUMMY : 1E-5*EXP(0./TEMP) ;
{818.} MEKBOOH  = DUMMY : 1E-5*EXP(0./TEMP) ;
{819.} C2OHOCO2H  = DUMMY : 1E-5*EXP(0./TEMP) ;
{820.} ISOPBOH  = DUMMY : 1E-5*EXP(0./TEMP) ;
{821.} CO2HOC61O  = DUMMY : 1E-5*EXP(0./TEMP) ;
{822.} ACCOMECO3H  = DUMMY : 1E-5*EXP(0./TEMP) ;
{823.} H13C43CHO  = DUMMY : 1E-5*EXP(0./TEMP) ;
{824.} HM2C43O  = DUMMY : 1E-5*EXP(0./TEMP) ;
{825.} PPN  = DUMMY : 1E-5*EXP(0./TEMP) ;
{826.} CO3C4NO3O  = DUMMY : 1E-5*EXP(0./TEMP) ;
{827.} CATEC1OOH  = DUMMY : 1E-5*EXP(0./TEMP) ;
{828.} HOC2H4CHO  = DUMMY : 1E-5*EXP(0./TEMP) ;
{829.} MCOCOMOXO  = DUMMY : 1E-5*EXP(0./TEMP) ;
{830.} ISOPDOH  = DUMMY : 1E-5*EXP(0./TEMP) ;
{831.} C58O2  = DUMMY : 1E-5*EXP(0./TEMP) ;
{832.} NBZFUONE  = DUMMY : 1E-5*EXP(0./TEMP) ;
{833.} MSIA  = DUMMY : 1E-5*EXP(0./TEMP) ;
{834.} MC3CODBCO2  = DUMMY : 1E-5*EXP(0./TEMP) ;
{835.} H2M3C4O  = DUMMY : 1E-5*EXP(0./TEMP) ;
{836.} A2PANO  = DUMMY : 1E-5*EXP(0./TEMP) ;
{837.} NO3CH2CO3H  = DUMMY : 1E-5*EXP(0./TEMP) ;
{838.} CO2C4DIAL  = DUMMY : 1E-5*EXP(0./TEMP) ;
{839.} IBUTOLBO  = DUMMY : 1E-5*EXP(0./TEMP) ;
{840.} IBUTOLCO2H  = DUMMY : 1E-5*EXP(0./TEMP) ;
{841.} HOBUT2CO2H  = DUMMY : 1E-5*EXP(0./TEMP) ;
{842.} NCRES1O2  = DUMMY : 1E-5*EXP(0./TEMP) ;
{843.} HO12CO3C4  = DUMMY : 1E-5*EXP(0./TEMP) ;
{844.} C58OH  = DUMMY : 1E-5*EXP(0./TEMP) ;
{845.} CATEC1O2  = DUMMY : 1E-5*EXP(0./TEMP) ;
{846.} IPEBOOH  = DUMMY : 1E-5*EXP(0./TEMP) ;
{847.} IC5H12  = DUMMY : 1E-5*EXP(0./TEMP) ;
{848.} SO3  = DUMMY : 1E-5*EXP(0./TEMP) ;
{849.} SO2  = DUMMY : 1E-5*EXP(0./TEMP) ;
{850.} CHOCOHONO2  = DUMMY : 1E-5*EXP(0./TEMP) ;
{851.} MALANHYO  = DUMMY : 1E-5*EXP(0./TEMP) ;
{852.} HO3C3CO3  = DUMMY : 1E-5*EXP(0./TEMP) ;
{853.} DNPHEN  = DUMMY : 1E-5*EXP(0./TEMP) ;
{854.} BUT2CHO  = DUMMY : 1E-5*EXP(0./TEMP) ;
{855.} ISOPBO2  = DUMMY : 1E-5*EXP(0./TEMP) ;
{856.} HO2C3CHO  = DUMMY : 1E-5*EXP(0./TEMP) ;
{857.} CATEC1O  = DUMMY : 1E-5*EXP(0./TEMP) ;
{858.} HO3C6O2  = DUMMY : 1E-5*EXP(0./TEMP) ;
{859.} MPAN  = DUMMY : 1E-5*EXP(0./TEMP) ;
{860.} C43NO34OOH  = DUMMY : 1E-5*EXP(0./TEMP) ;
{861.} PRPAL2CO3H  = DUMMY : 1E-5*EXP(0./TEMP) ;
{862.} PR2O2HNO3  = DUMMY : 1E-5*EXP(0./TEMP) ;
{863.} HO1C5OOH  = DUMMY : 1E-5*EXP(0./TEMP) ;
{864.} C3DIOLOOH  = DUMMY : 1E-5*EXP(0./TEMP) ;
{865.} C2H5NO3  = DUMMY : 1E-5*EXP(0./TEMP) ;
{866.} HMVKAOOH  = DUMMY : 1E-5*EXP(0./TEMP) ;
{867.} BUT1ENE  = DUMMY : 1E-5*EXP(0./TEMP) ;
{868.} MVKOHBO  = DUMMY : 1E-5*EXP(0./TEMP) ;
{869.} HO3C6O  = DUMMY : 1E-5*EXP(0./TEMP) ;
{870.} ME2BU2OLO2  = DUMMY : 1E-5*EXP(0./TEMP) ;
{871.} HCOCOHCO3H  = DUMMY : 1E-5*EXP(0./TEMP) ;
{872.} NPTLQO2  = DUMMY : 1E-5*EXP(0./TEMP) ;
{873.} PERIBUACID  = DUMMY : 1E-5*EXP(0./TEMP) ;
{874.} C63O2  = DUMMY : 1E-5*EXP(0./TEMP) ;
{875.} BZBIPERO2  = DUMMY : 1E-5*EXP(0./TEMP) ;
{876.} IPECOH  = DUMMY : 1E-5*EXP(0./TEMP) ;
{877.} MALNHYOHCO  = DUMMY : 1E-5*EXP(0./TEMP) ;
{878.} C5COOHCO3H  = DUMMY : 1E-5*EXP(0./TEMP) ;
{879.} C2H5O2  = DUMMY : 1E-5*EXP(0./TEMP) ;
{880.} CO24C6  = DUMMY : 1E-5*EXP(0./TEMP) ;
{881.} CO24C5  = DUMMY : 1E-5*EXP(0./TEMP) ;
{882.} C5134CO2OH  = DUMMY : 1E-5*EXP(0./TEMP) ;
{883.} CH3OH  = DUMMY : 1E-5*EXP(0./TEMP) ;
{884.} HO3C5O2  = DUMMY : 1E-5*EXP(0./TEMP) ;
{885.} BIACETO2  = DUMMY : 1E-5*EXP(0./TEMP) ;
{886.} IPECOOH  = DUMMY : 1E-5*EXP(0./TEMP) ;
{887.} NC4DCO2H  = DUMMY : 1E-5*EXP(0./TEMP) ;
{888.} IPEAOH  = DUMMY : 1E-5*EXP(0./TEMP) ;
{889.} CO235C6  = DUMMY : 1E-5*EXP(0./TEMP) ;
{890.} IBUDIALPAN  = DUMMY : 1E-5*EXP(0./TEMP) ;
{891.} O3  = DUMMY : 1E-5*EXP(0./TEMP) ;
{892.} PECO  = DUMMY : 1E-5*EXP(0./TEMP) ;
{893.} CO25C6OOH  = DUMMY : 1E-5*EXP(0./TEMP) ;
{894.} PERBUACID  = DUMMY : 1E-5*EXP(0./TEMP) ;
{895.} CO24C53O  = DUMMY : 1E-5*EXP(0./TEMP) ;
{896.} HEX2ONBO2  = DUMMY : 1E-5*EXP(0./TEMP) ;
{897.} HOCH2CO3H  = DUMMY : 1E-5*EXP(0./TEMP) ;
{898.} C6H5CH2O  = DUMMY : 1E-5*EXP(0./TEMP) ;
{899.} ACLOOA  = DUMMY : 1E-5*EXP(0./TEMP) ;
{900.} NC4MDCO2H  = DUMMY : 1E-5*EXP(0./TEMP) ;
{901.} CO3C5CO2H  = DUMMY : 1E-5*EXP(0./TEMP) ;
{902.} NBUTOLAO2  = DUMMY : 1E-5*EXP(0./TEMP) ;
{903.} DIEKAO  = DUMMY : 1E-5*EXP(0./TEMP) ;
{904.} NNCATECO  = DUMMY : 1E-5*EXP(0./TEMP) ;
{905.} C2H5CO3  = DUMMY : 1E-5*EXP(0./TEMP) ;
{906.} IBUTALBO2H  = DUMMY : 1E-5*EXP(0./TEMP) ;
{907.} C615CO2O2  = DUMMY : 1E-5*EXP(0./TEMP) ;
{908.} TOLUENE  = DUMMY : 1E-5*EXP(0./TEMP) ;
{909.} NDNCRESO2  = DUMMY : 1E-5*EXP(0./TEMP) ;
{910.} HEXAOOH  = DUMMY : 1E-5*EXP(0./TEMP) ;
{911.} C615CO2OH  = DUMMY : 1E-5*EXP(0./TEMP) ;
{912.} HO3C4CHO  = DUMMY : 1E-5*EXP(0./TEMP) ;
{913.} IPEAOOH  = DUMMY : 1E-5*EXP(0./TEMP) ;
{914.} NBUTOLAOH  = DUMMY : 1E-5*EXP(0./TEMP) ;
{915.} NBUTOLAOOH  = DUMMY : 1E-5*EXP(0./TEMP) ;
{916.} HEXCOOH  = DUMMY : 1E-5*EXP(0./TEMP) ;
{917.} HEX2ONCO2  = DUMMY : 1E-5*EXP(0./TEMP) ;
{918.} C6CO23HO5  = DUMMY : 1E-5*EXP(0./TEMP) ;
{919.} C6CO134  = DUMMY : 1E-5*EXP(0./TEMP) ;
{920.} C6H5CO3  = DUMMY : 1E-5*EXP(0./TEMP) ;
{921.} NCATECO2  = DUMMY : 1E-5*EXP(0./TEMP) ;
{922.} MCATEC1O2  = DUMMY : 1E-5*EXP(0./TEMP) ;
{923.} CH3COCO3H  = DUMMY : 1E-5*EXP(0./TEMP) ;
{924.} TC4H9OOH  = DUMMY : 1E-5*EXP(0./TEMP) ;
{925.} OH  = DUMMY : 1E-5*EXP(0./TEMP) ;
{926.} GLYOOB  = DUMMY : 1E-5*EXP(0./TEMP) ;
{927.} PR1O2HNO3  = DUMMY : 1E-5*EXP(0./TEMP) ;
{928.} CH3O2  = DUMMY : 1E-5*EXP(0./TEMP) ;
{929.} GLYOOA  = DUMMY : 1E-5*EXP(0./TEMP) ;
{930.} IPEAO2  = DUMMY : 1E-5*EXP(0./TEMP) ;
{931.} C4CO2DBCO3  = DUMMY : 1E-5*EXP(0./TEMP) ;
{932.} C2H5OH  = DUMMY : 1E-5*EXP(0./TEMP) ;
{933.} IPECO2  = DUMMY : 1E-5*EXP(0./TEMP) ;
{934.} GLYOOC  = DUMMY : 1E-5*EXP(0./TEMP) ;
{935.} MCOCOMOXO2  = DUMMY : 1E-5*EXP(0./TEMP) ;
{936.} DMSO2OOH  = DUMMY : 1E-5*EXP(0./TEMP) ;
{937.} DNPHENOOH  = DUMMY : 1E-5*EXP(0./TEMP) ;
{938.} C4CHOBOOH  = DUMMY : 1E-5*EXP(0./TEMP) ;
{939.} C4PAN2  = DUMMY : 1E-5*EXP(0./TEMP) ;
{940.} C51O  = DUMMY : 1E-5*EXP(0./TEMP) ;
{941.} MSA  = DUMMY : 1E-5*EXP(0./TEMP) ;
{942.} ME2BU2OLO  = DUMMY : 1E-5*EXP(0./TEMP) ;
{943.} TLEMUCO2  = DUMMY : 1E-5*EXP(0./TEMP) ;
{944.} PXYFUONE  = DUMMY : 1E-5*EXP(0./TEMP) ;
{945.} C6CO3OH5O2  = DUMMY : 1E-5*EXP(0./TEMP) ;
{946.} HOC3H6CO3  = DUMMY : 1E-5*EXP(0./TEMP) ;
{947.} PE2ENEBNO3  = DUMMY : 1E-5*EXP(0./TEMP) ;
{948.} MNCATECH  = DUMMY : 1E-5*EXP(0./TEMP) ;
{949.} NDNPHENO2  = DUMMY : 1E-5*EXP(0./TEMP) ;
{950.} HEXBOOH  = DUMMY : 1E-5*EXP(0./TEMP) ;
{951.} PROL11MOOH  = DUMMY : 1E-5*EXP(0./TEMP) ;
{952.} PTLQO  = DUMMY : 1E-5*EXP(0./TEMP) ;
{953.} HYPROPO2  = DUMMY : 1E-5*EXP(0./TEMP) ;
{954.} C41CO3H  = DUMMY : 1E-5*EXP(0./TEMP) ;
{955.} NBZQOOH  = DUMMY : 1E-5*EXP(0./TEMP) ;
{956.} C52OH  = DUMMY : 1E-5*EXP(0./TEMP) ;
{957.} IBUTOLBNO3  = DUMMY : 1E-5*EXP(0./TEMP) ;
{958.} MVKO2  = DUMMY : 1E-5*EXP(0./TEMP) ;
{959.} HO2C4O  = DUMMY : 1E-5*EXP(0./TEMP) ;
{960.} MEKANO3  = DUMMY : 1E-5*EXP(0./TEMP) ;
{961.} CH3SCH2O2  = DUMMY : 1E-5*EXP(0./TEMP) ;
{962.} C6H5CH2OH  = DUMMY : 1E-5*EXP(0./TEMP) ;
{963.} MPRKAO  = DUMMY : 1E-5*EXP(0./TEMP) ;
{964.} C59OOH  = DUMMY : 1E-5*EXP(0./TEMP) ;
{965.} HOCO3C5OOH  = DUMMY : 1E-5*EXP(0./TEMP) ;
{966.} CO3C4CO3  = DUMMY : 1E-5*EXP(0./TEMP) ;
{967.} HOCH2CH2O2  = DUMMY : 1E-5*EXP(0./TEMP) ;
{968.} PEAOH  = DUMMY : 1E-5*EXP(0./TEMP) ;
{969.} H2M3C4NO3  = DUMMY : 1E-5*EXP(0./TEMP) ;
{970.} C3PAN2  = DUMMY : 1E-5*EXP(0./TEMP) ;
{971.} IC3H7NO3  = DUMMY : 1E-5*EXP(0./TEMP) ;
{972.} BUTAL2NO3  = DUMMY : 1E-5*EXP(0./TEMP) ;
{973.} C4PAN4  = DUMMY : 1E-5*EXP(0./TEMP) ;
{974.} METACETHO  = DUMMY : 1E-5*EXP(0./TEMP) ;
{975.} C6PAN2  = DUMMY : 1E-5*EXP(0./TEMP) ;
{976.} HEX3ONDO  = DUMMY : 1E-5*EXP(0./TEMP) ;
{977.} MEKBO  = DUMMY : 1E-5*EXP(0./TEMP) ;
{978.} PEAO2  = DUMMY : 1E-5*EXP(0./TEMP) ;
{979.} OCCOHCO2  = DUMMY : 1E-5*EXP(0./TEMP) ;
{980.} IPEAO  = DUMMY : 1E-5*EXP(0./TEMP) ;
{981.} MPRKAOOH  = DUMMY : 1E-5*EXP(0./TEMP) ;
{982.} C6PAN1  = DUMMY : 1E-5*EXP(0./TEMP) ;
{983.} HOC2H4CO3H  = DUMMY : 1E-5*EXP(0./TEMP) ;
{984.} MVKOH  = DUMMY : 1E-5*EXP(0./TEMP) ;
{985.} C5CO2DBCO3  = DUMMY : 1E-5*EXP(0./TEMP) ;
{986.} ACO3  = DUMMY : 1E-5*EXP(0./TEMP) ;
{987.} HMVKAO  = DUMMY : 1E-5*EXP(0./TEMP) ;
{988.} CH3SCH2OH  = DUMMY : 1E-5*EXP(0./TEMP) ;
{989.} C6H5CH2O2  = DUMMY : 1E-5*EXP(0./TEMP) ;
{990.} PROLNO3  = DUMMY : 1E-5*EXP(0./TEMP) ;
{991.} MVKOO  = DUMMY : 1E-5*EXP(0./TEMP) ;
{992.} TLFUOH  = DUMMY : 1E-5*EXP(0./TEMP) ;
{993.} C52NO3  = DUMMY : 1E-5*EXP(0./TEMP) ;
{994.} BUT2CO3H  = DUMMY : 1E-5*EXP(0./TEMP) ;
{995.} H2  = DUMMY : 1E-5*EXP(0./TEMP) ;
{996.} PROL1MPAN  = DUMMY : 1E-5*EXP(0./TEMP) ;
{997.} HO1CO34C5  = DUMMY : 1E-5*EXP(0./TEMP) ;
{998.} CHOMOHCO3  = DUMMY : 1E-5*EXP(0./TEMP) ;
{999.} SC4H9OOH  = DUMMY : 1E-5*EXP(0./TEMP) ;
{1000.} TLEMUCO  = DUMMY : 1E-5*EXP(0./TEMP) ;
{1001.} HO2CO5C6  = DUMMY : 1E-5*EXP(0./TEMP) ;
{1002.} TLEMUCOH  = DUMMY : 1E-5*EXP(0./TEMP) ;
{1003.} HEX3ONCO  = DUMMY : 1E-5*EXP(0./TEMP) ;
{1004.} NCRESOOH  = DUMMY : 1E-5*EXP(0./TEMP) ;
{1005.} OCCOHCO  = DUMMY : 1E-5*EXP(0./TEMP) ;
{1006.} TLBIPEROOH  = DUMMY : 1E-5*EXP(0./TEMP) ;
{1007.} C5DICARB  = DUMMY : 1E-5*EXP(0./TEMP) ;
{1008.} CO2C3CO3  = DUMMY : 1E-5*EXP(0./TEMP) ;
{1009.} HO1CO3C4O2  = DUMMY : 1E-5*EXP(0./TEMP) ;
{1010.} HEXANO3  = DUMMY : 1E-5*EXP(0./TEMP) ;
{1011.} CHOMOHPAN  = DUMMY : 1E-5*EXP(0./TEMP) ;
{1012.} IC4H9O2  = DUMMY : 1E-5*EXP(0./TEMP) ;
{1013.} NNCATECOOH  = DUMMY : 1E-5*EXP(0./TEMP) ;
{1014.} TLFUO  = DUMMY : 1E-5*EXP(0./TEMP) ;
{1015.} CO23C54O2  = DUMMY : 1E-5*EXP(0./TEMP) ;
{1016.} ACR  = DUMMY : 1E-5*EXP(0./TEMP) ;
{1017.} HOC2H4CO3  = DUMMY : 1E-5*EXP(0./TEMP) ;
{1018.} DNPHENO  = DUMMY : 1E-5*EXP(0./TEMP) ;
{1019.} MMALNHY2OH  = DUMMY : 1E-5*EXP(0./TEMP) ;
{1020.} C2H5OOH  = DUMMY : 1E-5*EXP(0./TEMP) ;
{1021.} HO2C6NO3  = DUMMY : 1E-5*EXP(0./TEMP) ;
{1022.} C63O  = DUMMY : 1E-5*EXP(0./TEMP) ;
{1023.} HO13C4O  = DUMMY : 1E-5*EXP(0./TEMP) ;
{1024.} HO2C3CO3H  = DUMMY : 1E-5*EXP(0./TEMP) ;
{1025.} PEN2ONE1O  = DUMMY : 1E-5*EXP(0./TEMP) ;
{1026.} PECO2  = DUMMY : 1E-5*EXP(0./TEMP) ;
{1027.} NO  = DUMMY : 1E-5*EXP(0./TEMP) ;
{1028.} HO2C4NO3  = DUMMY : 1E-5*EXP(0./TEMP) ;
{1029.} PE2ENEBO2  = DUMMY : 1E-5*EXP(0./TEMP) ;
{1030.} HC4ACO3H  = DUMMY : 1E-5*EXP(0./TEMP) ;
{1031.} PBZN  = DUMMY : 1E-5*EXP(0./TEMP) ;
{1032.} ACCOMECO3  = DUMMY : 1E-5*EXP(0./TEMP) ;
{1033.} TLFUONE  = DUMMY : 1E-5*EXP(0./TEMP) ;
{1034.} C4CO2DCO3H  = DUMMY : 1E-5*EXP(0./TEMP) ;
{1035.} PIPN  = DUMMY : 1E-5*EXP(0./TEMP) ;
{1036.} C4M2ALOHO2  = DUMMY : 1E-5*EXP(0./TEMP) ;
{1037.} IPEBNO3  = DUMMY : 1E-5*EXP(0./TEMP) ;
{1038.} EGLYOX  = DUMMY : 1E-5*EXP(0./TEMP) ;
{1039.} CH3CO2H  = DUMMY : 1E-5*EXP(0./TEMP) ;
{1040.} MVKOOH  = DUMMY : 1E-5*EXP(0./TEMP) ;
{1041.} HO14C6  = DUMMY : 1E-5*EXP(0./TEMP) ;
{1042.} CH3SO  = DUMMY : 1E-5*EXP(0./TEMP) ;
{1043.} HO13C4O2  = DUMMY : 1E-5*EXP(0./TEMP) ;
{1044.} BIACETOH  = DUMMY : 1E-5*EXP(0./TEMP) ;
{1045.} IPEANO3  = DUMMY : 1E-5*EXP(0./TEMP) ;
{1046.} MVKOOA  = DUMMY : 1E-5*EXP(0./TEMP) ;
{1047.} CO2C3CHO  = DUMMY : 1E-5*EXP(0./TEMP) ;
{1048.} HOCO4C5OOH  = DUMMY : 1E-5*EXP(0./TEMP) ;
{1049.} HOC3H6CO2H  = DUMMY : 1E-5*EXP(0./TEMP) ;
{1050.} NISOPO  = DUMMY : 1E-5*EXP(0./TEMP) ;
{1051.} DIEK  = DUMMY : 1E-5*EXP(0./TEMP) ;
{1052.} DNCRES  = DUMMY : 1E-5*EXP(0./TEMP) ;
{1053.} C61NO3  = DUMMY : 1E-5*EXP(0./TEMP) ;
{1054.} C5DIALCO  = DUMMY : 1E-5*EXP(0./TEMP) ;
{1055.} C615CO2OOH  = DUMMY : 1E-5*EXP(0./TEMP) ;
{1056.} CO23C3CHO  = DUMMY : 1E-5*EXP(0./TEMP) ;
{1057.} HO2C4CO3  = DUMMY : 1E-5*EXP(0./TEMP) ;
{1058.} PECOH  = DUMMY : 1E-5*EXP(0./TEMP) ;
{1059.} TLEPOXMUC  = DUMMY : 1E-5*EXP(0./TEMP) ;
{1060.} PRNO3CO3  = DUMMY : 1E-5*EXP(0./TEMP) ;
{1061.} MNCATECO2  = DUMMY : 1E-5*EXP(0./TEMP) ;
{1062.} BUT2OLOOH  = DUMMY : 1E-5*EXP(0./TEMP) ;
{1063.} NOAOO  = DUMMY : 1E-5*EXP(0./TEMP) ;
{1064.} M2BUOL2O2  = DUMMY : 1E-5*EXP(0./TEMP) ;
{1065.} CO24C53O2  = DUMMY : 1E-5*EXP(0./TEMP) ;
{1066.} HO25C6  = DUMMY : 1E-5*EXP(0./TEMP) ;
{1067.} HCOCH2CO3H  = DUMMY : 1E-5*EXP(0./TEMP) ;
{1068.} NPHEN1O2  = DUMMY : 1E-5*EXP(0./TEMP) ;
{1069.} OCCOHCOOH  = DUMMY : 1E-5*EXP(0./TEMP) ;
{1070.} MEK  = DUMMY : 1E-5*EXP(0./TEMP) ;
{1071.} C6CO34OOH  = DUMMY : 1E-5*EXP(0./TEMP) ;
{1072.} C6CO134OOH  = DUMMY : 1E-5*EXP(0./TEMP) ;
{1073.} C6HOCOOOH  = DUMMY : 1E-5*EXP(0./TEMP) ;
{1074.} NCATECOOH  = DUMMY : 1E-5*EXP(0./TEMP) ;
{1075.} NBUTOLBO2  = DUMMY : 1E-5*EXP(0./TEMP) ;
{1076.} CO2H3CO3  = DUMMY : 1E-5*EXP(0./TEMP) ;
{1077.} MNNCATECO  = DUMMY : 1E-5*EXP(0./TEMP) ;
{1078.} HO2CO4CHO  = DUMMY : 1E-5*EXP(0./TEMP) ;
{1079.} MNCATECO  = DUMMY : 1E-5*EXP(0./TEMP) ;
{1080.} TLEMUCPAN  = DUMMY : 1E-5*EXP(0./TEMP) ;
{1081.} C56OOH  = DUMMY : 1E-5*EXP(0./TEMP) ;
{1082.} C4MALOHOOH  = DUMMY : 1E-5*EXP(0./TEMP) ;
{1083.} HO2M2C4O2  = DUMMY : 1E-5*EXP(0./TEMP) ;
{1084.} BZOBIPEROH  = DUMMY : 1E-5*EXP(0./TEMP) ;
{1085.} PROPOLNO3  = DUMMY : 1E-5*EXP(0./TEMP) ;
{1086.} HO3C4CO3H  = DUMMY : 1E-5*EXP(0./TEMP) ;
{1087.} H14CO23C4  = DUMMY : 1E-5*EXP(0./TEMP) ;
{1088.} HO2C5OOH  = DUMMY : 1E-5*EXP(0./TEMP) ;
{1089.} HO2M2C4NO3  = DUMMY : 1E-5*EXP(0./TEMP) ;
{1090.} MVKOHBOOH  = DUMMY : 1E-5*EXP(0./TEMP) ;
{1091.} HM2C43OOH  = DUMMY : 1E-5*EXP(0./TEMP) ;
{1092.} CO2C4CO3  = DUMMY : 1E-5*EXP(0./TEMP) ;
{1093.} HOIPRGLYOX  = DUMMY : 1E-5*EXP(0./TEMP) ;
{1094.} HOC3H6CHO  = DUMMY : 1E-5*EXP(0./TEMP) ;
{1095.} CHOMOHCO3H  = DUMMY : 1E-5*EXP(0./TEMP) ;
{1096.} C5H11CHO  = DUMMY : 1E-5*EXP(0./TEMP) ;
{1097.} HO1C6NO3  = DUMMY : 1E-5*EXP(0./TEMP) ;
{1098.} CO24C6O2  = DUMMY : 1E-5*EXP(0./TEMP) ;
{1099.} HEX3ONDNO3  = DUMMY : 1E-5*EXP(0./TEMP) ;
{1100.} HO2  = DUMMY : 1E-5*EXP(0./TEMP) ;
{1101.} C3H7CO3  = DUMMY : 1E-5*EXP(0./TEMP) ;
{1102.} IPRCO3  = DUMMY : 1E-5*EXP(0./TEMP) ;
{1103.} NISOPO2  = DUMMY : 1E-5*EXP(0./TEMP) ;
{1104.} MIPKBOOH  = DUMMY : 1E-5*EXP(0./TEMP) ;
{1105.} C5CO23O2  = DUMMY : 1E-5*EXP(0./TEMP) ;
{1106.} CH3SOO2NO2  = DUMMY : 1E-5*EXP(0./TEMP) ;
{1107.} HEXCNO3  = DUMMY : 1E-5*EXP(0./TEMP) ;
{1108.} NTLFUOOH  = DUMMY : 1E-5*EXP(0./TEMP) ;
{1109.} PRNO3CO2H  = DUMMY : 1E-5*EXP(0./TEMP) ;
{1110.} MACR  = DUMMY : 1E-5*EXP(0./TEMP) ;
{1111.} HEXBO  = DUMMY : 1E-5*EXP(0./TEMP) ;
{1112.} C42CHO  = DUMMY : 1E-5*EXP(0./TEMP) ;
{1113.} MACO3  = DUMMY : 1E-5*EXP(0./TEMP) ;
{1114.} HCOCOHPAN  = DUMMY : 1E-5*EXP(0./TEMP) ;
{1115.} BENZAL  = DUMMY : 1E-5*EXP(0./TEMP) ;
{1116.} HEX2ONBO  = DUMMY : 1E-5*EXP(0./TEMP) ;
{1117.} C4M2ALOHO  = DUMMY : 1E-5*EXP(0./TEMP) ;
{1118.} BZBIPER2OH  = DUMMY : 1E-5*EXP(0./TEMP) ;
{1119.} DNCRESO2  = DUMMY : 1E-5*EXP(0./TEMP) ;
{1120.} IBUTALBO2  = DUMMY : 1E-5*EXP(0./TEMP) ;
{1121.} HO2C5O  = DUMMY : 1E-5*EXP(0./TEMP) ;
{1122.} HO3C5NO3  = DUMMY : 1E-5*EXP(0./TEMP) ;
{1123.} NPHENOH  = DUMMY : 1E-5*EXP(0./TEMP) ;
{1124.} HO2C5NO3  = DUMMY : 1E-5*EXP(0./TEMP) ;
{1125.} C4PAN10  = DUMMY : 1E-5*EXP(0./TEMP) ;
{1126.} NO3CH2PAN  = DUMMY : 1E-5*EXP(0./TEMP) ;
{1127.} C4CODBCO3H  = DUMMY : 1E-5*EXP(0./TEMP) ;
{1128.} IPECNO3  = DUMMY : 1E-5*EXP(0./TEMP) ;
{1129.} MMALANHYO  = DUMMY : 1E-5*EXP(0./TEMP) ;
{1130.} C23O3CCO3H  = DUMMY : 1E-5*EXP(0./TEMP) ;
{1131.} CH3COCH3  = DUMMY : 1E-5*EXP(0./TEMP) ;
{1132.} IBUTALCO2  = DUMMY : 1E-5*EXP(0./TEMP) ;
{1133.} PBZQOOH  = DUMMY : 1E-5*EXP(0./TEMP) ;
{1134.} ACCOMECHO  = DUMMY : 1E-5*EXP(0./TEMP) ;
{1135.} CO3C4NO3  = DUMMY : 1E-5*EXP(0./TEMP) ;
{1136.} IBUTALBO  = DUMMY : 1E-5*EXP(0./TEMP) ;
{1137.} MALDIALO2  = DUMMY : 1E-5*EXP(0./TEMP) ;
{1138.} HO2M2C4OH  = DUMMY : 1E-5*EXP(0./TEMP) ;
{1139.} C5DIALO  = DUMMY : 1E-5*EXP(0./TEMP) ;
{1140.} PECNO3  = DUMMY : 1E-5*EXP(0./TEMP) ;
{1141.} CO24C6O  = DUMMY : 1E-5*EXP(0./TEMP) ;
{1142.} C3MDIALOH  = DUMMY : 1E-5*EXP(0./TEMP) ;
{1143.} C61CO  = DUMMY : 1E-5*EXP(0./TEMP) ;
{1144.} ISOPBO  = DUMMY : 1E-5*EXP(0./TEMP) ;
{1145.} C58O  = DUMMY : 1E-5*EXP(0./TEMP) ;
{1146.} O  = DUMMY : 1E-5*EXP(0./TEMP) ;
{1147.} O1D  = DUMMY : 1E-5*EXP(0./TEMP) ;
{1148.} N2O5  = DUMMY : 1E-5*EXP(0./TEMP) ;
{1149.} HONO  = DUMMY : 1E-5*EXP(0./TEMP) ;
{1150.} HO2NO2  = DUMMY : 1E-5*EXP(0./TEMP) ;
{1151.} HSO3  = DUMMY : 1E-5*EXP(0./TEMP) ;
{1152.} DUMMY  = DUMMY : 1E-5*EXP(0./TEMP) ;
{1153.} H  = DUMMY : 1E-5*EXP(0./TEMP) ;
{1154.} O2  = DUMMY : 1E-5*EXP(0./TEMP) ;
{1155.} BRO  = DUMMY : 1E-5*EXP(0./TEMP) ;
{1156.} BR  = DUMMY : 1E-5*EXP(0./TEMP) ;
{1157.} HBR  = DUMMY : 1E-5*EXP(0./TEMP) ;
{1158.} HOBR  = DUMMY : 1E-5*EXP(0./TEMP) ;
{1159.} BRONO2  = DUMMY : 1E-5*EXP(0./TEMP) ;
{1160.} BRNO2  = DUMMY : 1E-5*EXP(0./TEMP) ;
{1161.} BRNO  = DUMMY : 1E-5*EXP(0./TEMP) ;
{1162.} BR2  = DUMMY : 1E-5*EXP(0./TEMP) ;
{1163.} I2  = DUMMY : 1E-5*EXP(0./TEMP) ;
{1164.} IO  = DUMMY : 1E-5*EXP(0./TEMP) ;
{1165.} I  = DUMMY : 1E-5*EXP(0./TEMP) ;
{1166.} HOI  = DUMMY : 1E-5*EXP(0./TEMP) ;
{1167.} HI  = DUMMY : 1E-5*EXP(0./TEMP) ;
{1168.} INO  = DUMMY : 1E-5*EXP(0./TEMP) ;
{1169.} INO2  = DUMMY : 1E-5*EXP(0./TEMP) ;
{1170.} IONO2  = DUMMY : 1E-5*EXP(0./TEMP) ;
{1171.} OIO  = DUMMY : 1E-5*EXP(0./TEMP) ;
{1172.} I2O2  = DUMMY : 1E-5*EXP(0./TEMP) ;
{1173.} I2O3  = DUMMY : 1E-5*EXP(0./TEMP) ;
{1174.} I2O4  = DUMMY : 1E-5*EXP(0./TEMP) ;
{1175.} HOIO2  = DUMMY : 1E-5*EXP(0./TEMP) ;
{1176.} HCO  = DUMMY : 1E-5*EXP(0./TEMP) ;
{1177.} CH3CO  = DUMMY : 1E-5*EXP(0./TEMP) ;
{1178.} BR_A  = DUMMY : 1E-5*EXP(0./TEMP) ;
{1179.} I_A  = DUMMY : 1E-5*EXP(0./TEMP) ;
{1180.} A  = DUMMY : 1E-5*EXP(0./TEMP) ;
