# Supplementary material for: Impacts of bromine and iodine chemistry on tropospheric OH and HO 2 : comparing observations with box and global model perspectives
Source: Copernicus journal article supplement (doi:10.5194/acp-18-3541-2018), 2018-03-12
Supplement: Supplementary file 3 [file acp-18-3541-2018-supplement.zip › dstone_cvao_sos_supplementary_material/dstone_cvao_sos_kpp_files/dstone_cvao_sos_halogen.kpp]

#DEFVAR
BRO = IGNORE ;
BR = IGNORE ;
HBR = IGNORE ;
HOBR = IGNORE ;
BRONO2 = IGNORE ;
BRNO2 = IGNORE ;
BRNO = IGNORE ;
BR2 = IGNORE ;
I2 = IGNORE ;
IO = IGNORE ;
I = IGNORE ;
HOI = IGNORE ;
HI = IGNORE ;
INO = IGNORE ;
INO2 = IGNORE ;
IONO2 = IGNORE ;
OIO = IGNORE ;
I2O2 = IGNORE ;
I2O3 = IGNORE ;
I2O4 = IGNORE ;
HOIO2 = IGNORE ;
HCO = IGNORE ;
CH3CO = IGNORE ;
BR_A = IGNORE ;
I_A = IGNORE ;
A = IGNORE ;
#EQUATIONS
{1.}	O + BRO = BR 		:	1.9E-11*EXP(230/TEMP) ;
{2.}	O + HBR = OH + BR	:	5.8E-12*EXP(-1500/TEMP) ;	
{3.}	O + HOBR = OH + BRO 	:	1.2E-10*EXP(-430/TEMP) ;
{4.}	O + BRONO2 = NO2 + BRO	:	1.9E-11*EXP(215/TEMP) ;
{5.}	OH + BR2 = HOBR + BR	:	2.1E-11*EXP(240/TEMP) ;
{6.}	OH + BRO = HO2 + BR	:	1.7E-11*EXP(250/TEMP) ;
{7.}	OH + HBR = BR		:	5.5E-12*EXP(200/TEMP) ;
{8.}	HO2 + BR = HBR 		:	4.8E-12*EXP(-310/TEMP) ;
{9.}	HO2 + BRO = HOBR	:	4.5E-12*EXP(460/TEMP) ;		//IUPAC
{10.}	NO3 + HBR = HNO3 + BR	:	1.0E-16*EXP(0./TEMP) ;
{11.}	BR + O3 = BRO 		:	1.7E-11*EXP(-800/TEMP) ;
{12.}	BR + H2O2 = HBR + HO2	:	1.0E-11*EXP(-3000/TEMP) ;
{13.}	BR + NO2 = BRNO2	:	KMT1001 ;
{14.}	BR + NO3 = BRO + NO2 	:	1.6E-11*EXP(0./TEMP) ;
{15.}	BR + HCHO = HBR + CO + HO2	:	1.7E-11*EXP(-800/TEMP) ;
{16.}	BRO + O3 = BR		:	1.0E-12*EXP(-3200/TEMP) ;
{17.}	BRO + NO = NO2 + BR 	:	8.8E-12*EXP(260/TEMP) ;
{18.}	BRO + NO2 = BRONO2	:	KMT1002 ;
{19.}	BR + CH3CHO = HBR + CH3CO3 :	1.80E-12*EXP(-460/TEMP) ;	//Mossinger and Cox 2001 (LW)
{20.}	BRO + IO = BR + I 	:	2.50E-11*EXP(260/TEMP)*0.3 ;	//Mossinger and Cox 2001 (LW)
{21.}	BRO + IO = BR + OIO 	:	2.50E-11*EXP(260/TEMP)*0.7 ;	//Mossinger and Cox 2001 (LW)
{22.}	BRO + BRO = BR + BR	:	2.4E-12*EXP(40/TEMP) ;		//Mossinger and Cox 2001 (LW), also in JPL15 2006 notes
{23.}	BRO + BRO = BR2 	:	2.80E-14*EXP(860/TEMP) ;	//Mossinger and Cox 2001 (LW), also in JPL15 2006 notes
{24.}	BRONO2 + BR = BR2 + NO3 :	4.90E-11*EXP(0./TEMP) ;		//Orlando and Tyndall 1996 (LW)
{25.}	BRONO2 + NO = BRNO + NO3 : 	3.00E-19*EXP(0./TEMP) ;		//Orlando and Tyndall 1996 (LW)
{26.}	BRONO2 + BRNO = BR2 + NO2 + NO2 :	1.00E-16*EXP(0./TEMP) ;	//Orlando and Tyndall 1996 (LW)
{27.}	O + I2 = IO + I		:	1.4E-10*EXP(0./TEMP) ;
{28.}	O + IO = I		:	1.2E-10*EXP(0./TEMP) ;
{29.}	OH + I2 = HOI + I	:	1.8E-10*EXP(0./TEMP) ;
{30.}	OH + HI = I		:	3.0E-11*EXP(0./TEMP) ;
{31.}	HO2 + I = HI 		:	1.5E-11*EXP(-1090/TEMP) ;
{32.}	HO2 + IO = HOI 		:	1.4E-11*EXP(540/TEMP) ;		//IUPAC
{33.}	I + O3 = IO 		:	2.3E-11*EXP(-870/TEMP) ;
{34.}	I + NO = INO		:	KMT1003 ;
{35.}	I + NO2 = INO2		:	KMT1004 ;
{36.}	I + BRO = IO + BR	:	1.2E-11*EXP(0./TEMP) ;
{37.}	IO + NO = I + NO2	:	9.1E-12*EXP(240/TEMP) ;
{38.}	IO + NO2 = IONO2 	:	KMT1005 ;
{39.}	INO + INO = I2 + NO + NO	:	8.4E-11*EXP(-2620/TEMP) ;
{40.}	INO2 + INO2 = I2 + NO2 + NO2	:	2.9E-11*EXP(-2600/TEMP) ; //Reactions above from JPL-15 2006 unless stated otherwise
{41.}	IO + IO = OIO + I		:	5.40E-11*EXP(180/TEMP)*0.38 ;	
{42.}	IO + IO = I2O2 		: 	5.40E-11*EXP(180/TEMP)*0.62 ;
{43.}	I + NO3	= IO + NO2 	: 	4.50E-10*EXP(0./TEMP) ;		//Chambers et al 1992 (LW)
{44.}	HOI + OH = IO 	 	:	2.00E-13*EXP(0./TEMP) ;		//Mossinger and Cox 2001 (LW)
{45.}	I2 + NO3 = I + IONO2 	: 	1.50E-12*EXP(0./TEMP) ;		//IUPAC
{46.}	IO + OIO = I2O3 	: 	1.50E-10*EXP(0./TEMP) ;		//Martin et al 2005 (S-L)
{47.}	OIO + OIO = I2O4 	: 	1.00E-10*EXP(0./TEMP) ;		//Martin et al 2005 (S-L)
{48.}	OIO + OH = HOIO2 	: 	2.20E-10*EXP(243/TEMP) ;	//Plane et al 2006 (LW)
{49.}	OIO + NO = NO2 + IO 	: 	1.10E-12*EXP(542/TEMP) ;	//Plane et al 2006 (LW)
{50.}	I2O2 = I + OIO 		: 	0.21*EXP(0./TEMP) ;		//Saiz-Lopez et al 2006 
{51.}	I2 + O3 = IO + I 	:	3.8E-18*EXP(0./TEMP) ;			//Saiz-Lopez et al 2007 (LW)
{52.}	I2 + O3 = OIO + IO 	:	3.8E-18*EXP(0./TEMP) ;			//Saiz-Lopez et al 2007 (LW)
/////////////////////////////////////////////////////////////////
// Photolysis reactions
{53.}	BR2 = BR + BR : J(1003) ;
{54.}	BRO = BR + O : J(1002) ;
{55.}	HOBR = BR + OH : J(1001) ;
{56.}	BRONO2 = BRO + NO2 : J(1005) + 2.8E13*EXP(-12360./TEMP) ;	//Includes thermal decomposition Orlando and Tyndall 1996 (LW)
{57.}	BRONO2 = BR + NO3 : J(1004) ;
// PHOTOLYSIS GUESSES
{58.}	BRNO2 = BR + NO2 	: J(4)/2. ;
{59.}	BRNO = BR + NO 		: J(1002) ;
{60.}	I2 = I + I 		: J(5)+J(6) ;
{61.}	IO = I + O 		: J(5)+J(6) ;
{62.}	OIO = I + O2 		: J(1003) ;
{63.}	HOI = OH + I 		: J(4) ;
{64.}	INO2 = I + NO2		: J(1001)*0.5+((2.4/0.005)*2.07E15*EXP(-11859/TEMP)) ;//Includes thermal decomposition Saiz-Lopez et al 2007 (LW)
{65.}	INO2 = IO + NO		: J(1001)*0.5 ;
{66.}	IONO2 = IO + NO2	: J(1001)+(1.10E15*EXP(-12060./TEMP)) ;		//Thermal decomp from IUPAC 2006 (LW)
{67.}	IONO2 = I + NO3		: J(1001) ;
{68.}	INO = I + NO		: J(1002) ;
{69.}	I2O2 = IO + IO		: (J(1003)/2.)+(1.3E-4*EXP(0./TEMP)) ;	//Saiz-Lopez et al 2006 
{70.}	OIO = I			: J(1003) ;
{71.}	I2O3 = IO + OIO		: J(4) ;
{72.}	I2O4 = OIO + OIO	: (J(4))+(4.4E-4*EXP(0./TEMP)) ;
/////////////////////////////////////////////////////////////////
// Aerosol conversion GAMMA, TEMP, SA(M^2/M^3), MASS (KG)
{73.} 	HOI 	=	0.5 I2 : 	UPTAKE(0.06D0,TEMP,SAREA,(1D0+16D0+127D0)/1D3) ;
{74.}	OIO 	=	0.5 I2 : 	UPTAKE(1.D0,TEMP,SAREA,(16D0+127D0+16D0)/1D3) ;
{75.}	IO 	=	0.5 I2 : 	UPTAKE(0.02D0,TEMP,SAREA,(127D0+16D0)/1D3) ;
{76.}	HI 	= 	0.5 I2 : 	UPTAKE(0.02D0,TEMP,SAREA,(1D0+127D0)/1D3) ;
{77.}	INO2 	= 	0.5 I2 : 	UPTAKE(0.02D0,TEMP,SAREA,(127D0+14D0+16D0+16D0)/1D3) ;
{78.}	IONO2 	= 	0.5 I2 : 	UPTAKE(0.02D0,TEMP,SAREA,(127D0+16D0+14D0+16D0+16D0)/1D3) ;
{79.}	HOBR 	= 	0.5 BR2 : 	UPTAKE(0.06D0,TEMP,SAREA,(1D0+16D0+80D0)/1D3) ;
{80.}	HBR 	= 	0.5 BR2 : 	UPTAKE(0.02D0,TEMP,SAREA,(1D0+80d0)/1d3) ;
{81.}	BRONO2 	= 	0.5 BR2 : 	UPTAKE(0.02D0,TEMP,SAREA,(80D0+14D0+(3.*16D0))/1D3) ;
{82.}	BRNO2	=	0.5 BR2 :	UPTAKE(0.02D0,TEMP,SAREA,(80D0+14D0+(2.*16D0))/1D3) ; 
{83.}	HO2 	= 	DUMMY + A : 	UPTAKE(0.1D0,TEMP,SAREA,(1D0+16D0+16D0)/1D3) ;	
{84.}	CH3O2 	= 	DUMMY + A : 	UPTAKE(0.004D0,TEMP,SAREA,((3.*1D0)+(2.*16D0)+12D0)/1D3) ;
{85.}	HNO3 	= 	DUMMY + A : 	UPTAKE(0.014D0,TEMP,SAREA,(1D0+(3.*16D0)+14D0)/1D3) ;		
{86.}	OH 	= 	DUMMY + A : 	UPTAKE(1.D0,TEMP,SAREA,(1D0+16D0)/1D3) ;	
/////////////////////////////////////////////////////////////////
// Dry deposition
{87.}	HOIO2 = 0.00001 DUMMY : 5e-3*EXP(0./TEMP) ;
/////////////////////////////////////////////////////////////////
//XO + DMS from JPL-06
{88.}	IO + DMS = DUMMY : 1.2E-14*EXP(0./TEMP) ;
{89.}	BRO + DMS = BR + DMSO : 1.4E-14*EXP(950./TEMP) ;
