# Supplementary material for: Impacts of bromine and iodine chemistry on tropospheric OH and HO 2 : comparing observations with box and global model perspectives
Source: Copernicus journal article supplement (doi:10.5194/acp-18-3541-2018), 2018-03-12
Supplement: Supplementary file 3 [file acp-18-3541-2018-supplement.zip › dstone_cvao_sos_supplementary_material/dstone_cvao_sos_kpp_files/dstone_cvao_sos_inorganic.kpp]

#DEFVAR
O = IGNORE ;
O1D = IGNORE ;
N2O5 = IGNORE ;
HONO = IGNORE ;
HO2NO2 = IGNORE ;
HSO3 = IGNORE ;
DUMMY = IGNORE;
H = IGNORE;
O2 = IGNORE;
#EQUATIONS
{1.}	O = O3 :	6.00E-34*O2*O2*((TEMP/300)**-2.6)+5.60E-34*O2*N2*((TEMP/300)**-2.6) ;
{2.}	O + O3 = DUMMY :	8.00E-12*EXP(-2060/TEMP) ;
{3.}	O + NO = NO2 :	KMT01 ;
{4.}	O + NO2 = NO :	5.50E-12*EXP(188/TEMP) ;
{5.}	O + NO2 = NO3 :	KMT02 ;
{6,7}	O1D = O :	(3.30E-11*O2*EXP(55/TEMP))+(2.15E-11*N2*EXP(110/TEMP)) ;
{8.}	NO + O3 = NO2 :	1.40E-12*EXP(-1310/TEMP) ;
{9.}	NO2 + O3 = NO3 :	1.40E-13*EXP(-2470/TEMP) ;
{10.}	NO + NO = NO2 + NO2 :	3.30E-39*EXP(530/TEMP)*O2 ;
{11.}	NO + NO3 = NO2 + NO2 :	1.80E-11*EXP(110/TEMP) ;
{12.}	NO2 + NO3 = NO + NO2 :	4.50E-14*EXP(-1260/TEMP) ;
{13.}	NO2 + NO3 = N2O5 :	KMT03 ;
{14.}	N2O5 = NO3 + NO2 :	KMT04 ;
{15.}	O1D = OH + OH :	1.63E-10*EXP(60/TEMP)*H2O ;
{16.}	OH + O3 = HO2 :	1.70E-12*EXP(-940/TEMP) ;
{17.}	OH + H2 = HO2 :	2.80E-12*EXP(-1800/TEMP) ;
{18.}	OH + CO = HO2 :	KMT05 ;
{19.}	OH + H2O2 = HO2 : 2.90E-12*EXP(-160/TEMP) ;
{20.}	HO2 + O3 = OH :	1.00E-14*EXP(-490/TEMP) ;
{21.}	OH + HO2 = DUMMY : 4.80E-11*EXP(250/TEMP) ;
{22,23}	HO2 + HO2 = H2O2 :	(2.20E-13*KMT06*EXP(600/TEMP))+(1.90E-33*M*KMT06*EXP(980/TEMP)) ;
{24.}	OH + NO = HONO :	KMT07 ;
{25.}	OH + NO2 = HNO3 :	KMT08 ;
{26.}	OH + NO3 = HO2 + NO2 :	2.00E-11*EXP(0./TEMP);
{27.}	HO2 + NO = OH + NO2 :	3.50E-12*EXP(250/TEMP) ;
{28.}	HO2 + NO2 = HO2NO2 :	KMT09 ;
{29.}	HO2NO2 = NO2 + HO2 :	KMT10 ;
{30.}	OH + HO2NO2 = NO2 :	3.20E-12*EXP(690/TEMP) ;
{31.}	HO2 + NO3 = OH + NO2 :	4.00E-12*EXP(0./TEMP) ;
{32.}	OH + HONO = NO2 :	2.50E-12*EXP(260/TEMP) ;
{33.}	OH + HNO3 = NO3 :	KMT11 ;
{34.}	O + SO2 = SO3 :	4.00E-32*EXP(-1000/TEMP)*M ;
{35.}	OH + SO2 = HSO3 :	KMT12 ;
{36.}	HSO3 = HO2 + SO3 :	1.30E-12*EXP(-330/TEMP)*O2 ;
{37.}	O3 = O1D :	J(1) ;
{38.}	O3 = O :	J(2) ;
{39.}	H2O2 = OH + OH :	J(3) ;
{40.}	NO2 = NO + O :	J(4) ;
{41.}	NO3 = NO :	J(5) ;
{42.}	NO3 = NO2 + O :	J(6) ;
{43.}	HONO = OH + NO :	J(7) ;
{44.}	HNO3 = OH + NO2 :	J(8) ;
