# Supplementary material for: Impacts of bromine and iodine chemistry on tropospheric OH and HO 2 : comparing observations with box and global model perspectives
Source: Copernicus journal article supplement (doi:10.5194/acp-18-3541-2018), 2018-03-12
Supplement: Supplementary file 3 [file acp-18-3541-2018-supplement.zip › dstone_cvao_sos_supplementary_material/dstone_cvao_sos_kpp_files/dstone_cvao_sos_organic.kpp]

#INLINE F90_GLOBAL 
 REAL(dp)::M, N2, O2, RO2, H2O 
 #ENDINLINE {above lines go into MODULE KPP_ROOT_Global}
#INCLUDE atoms 
#DEFVAR
MALANHY = IGNORE ;
IBUTALO2H = IGNORE ;
HO1C3O = IGNORE ;
C5DICARBO2 = IGNORE ;
H2M3C4OOH = IGNORE ;
C4PAN6 = IGNORE ;
C4PAN1 = IGNORE ;
TBUTOLO = IGNORE ;
ETHENO3O = IGNORE ;
BUTALO2 = IGNORE ;
HEX3ONANO3 = IGNORE ;
HO1CO3CHO = IGNORE ;
C5DIALO2 = IGNORE ;
CHOPRNO3 = IGNORE ;
C4PAN3 = IGNORE ;
CHOCOHCO = IGNORE ;
MVKOHANO3 = IGNORE ;
HO2CO4C5O = IGNORE ;
SC4H9NO3 = IGNORE ;
MNNCATECO2 = IGNORE ;
ISOPDOOH = IGNORE ;
IPROPOL = IGNORE ;
C6CO4DB = IGNORE ;
BZEMUCO = IGNORE ;
IBUTOLCNO3 = IGNORE ;
IPRHOCO2H = IGNORE ;
ETHGLY = IGNORE ;
CO14O3CO2H = IGNORE ;
MACROH = IGNORE ;
PROPALOOH = IGNORE ;
MACROO = IGNORE ;
C3MCODBPAN = IGNORE ;
ETHO2HNO3 = IGNORE ;
NDNPHENO = IGNORE ;
HMGLOOA = IGNORE ;
C6CO34 = IGNORE ;
PROPALO2 = IGNORE ;
CO2C4CHO = IGNORE ;
HM2C43O2 = IGNORE ;
C54OH = IGNORE ;
M2BUOL2O = IGNORE ;
HO3C5CO2H = IGNORE ;
CO24C4CHO = IGNORE ;
MEKAOOH = IGNORE ;
NBZQO2 = IGNORE ;
HO3C5O = IGNORE ;
C56O = IGNORE ;
MACRO2 = IGNORE ;
HO2CO4C5O2 = IGNORE ;
BUTALO = IGNORE ;
C2H5CHOO = IGNORE ;
ACO3H = IGNORE ;
BUT2OLAO = IGNORE ;
NTLFUO2 = IGNORE ;
C4ME3HO23 = IGNORE ;
PEAOOH = IGNORE ;
C5COO2NO2 = IGNORE ;
PROL11MNO3 = IGNORE ;
HEXBNO3 = IGNORE ;
C4H9CHO = IGNORE ;
NBUTOL = IGNORE ;
HEX2ONE = IGNORE ;
C5DIALOH = IGNORE ;
TLBIPER2OH = IGNORE ;
HO1CO24C5 = IGNORE ;
ISOPAOOH = IGNORE ;
IPROPOLO = IGNORE ;
PROL1MCO3H = IGNORE ;
HO1CO24C6 = IGNORE ;
HO1CO3C4O = IGNORE ;
CO23C65OOH = IGNORE ;
C6H5CH2OOH = IGNORE ;
ISOPCOOH = IGNORE ;
HYPERACET = IGNORE ;
NBZFUOOH = IGNORE ;
IPEBO = IGNORE ;
MIPK = IGNORE ;
HO2C6O = IGNORE ;
C615CO2O = IGNORE ;
DIEKBNO3 = IGNORE ;
PTLQONE = IGNORE ;
CO3C4NO3O2 = IGNORE ;
HEXAO = IGNORE ;
NPROPOL = IGNORE ;
MMALANHYO2 = IGNORE ;
MEKAO = IGNORE ;
C42CO3H = IGNORE ;
NPXYFUO = IGNORE ;
C6HO1CO3O = IGNORE ;
HCOCH2CO2H = IGNORE ;
NO2 = IGNORE ;
NO3 = IGNORE ;
HOCH2CO2H = IGNORE ;
VGLYOX = IGNORE ;
HEX2ONBNO3 = IGNORE ;
H2O2 = IGNORE ;
C58NO3 = IGNORE ;
IC4H9NO3 = IGNORE ;
IBUTOLCO2 = IGNORE ;
BUT2CO2H = IGNORE ;
NCATECHOL = IGNORE ;
CH3S = IGNORE ;
C59O = IGNORE ;
BU1ENO3O2 = IGNORE ;
NBZQO = IGNORE ;
EPXDLCO2H = IGNORE ;
NC5H12 = IGNORE ;
BZFUONOOA = IGNORE ;
HEX3ONBO = IGNORE ;
HMVKBO2 = IGNORE ;
MECOACETO = IGNORE ;
M2BU2OLOOH = IGNORE ;
PEBNO3 = IGNORE ;
HOC2H4CO2H = IGNORE ;
TLBIPERO = IGNORE ;
PRONO3AO2 = IGNORE ;
PEBO2 = IGNORE ;
MALDIAL = IGNORE ;
HOIPRCO2H = IGNORE ;
PEBOH = IGNORE ;
C6HO1CO3O2 = IGNORE ;
HO2C4OOH = IGNORE ;
C3COCCO3H = IGNORE ;
IBUTOLBO2H = IGNORE ;
NPXYFUOOH = IGNORE ;
PROPACID = IGNORE ;
C3COCCO3 = IGNORE ;
IBUTOLBO2 = IGNORE ;
DMSO2O2 = IGNORE ;
HO2C4OH = IGNORE ;
CO2H3CO3H = IGNORE ;
CH3CHO = IGNORE ;
NC3H7O = IGNORE ;
MALANHYOOH = IGNORE ;
BENZENE = IGNORE ;
NC3H7NO3 = IGNORE ;
C63OH = IGNORE ;
IC3H7O2 = IGNORE ;
PRONO3BO = IGNORE ;
C3DIALO = IGNORE ;
HOCO3C54O2 = IGNORE ;
MPRK = IGNORE ;
NOA = IGNORE ;
TLBIPERNO3 = IGNORE ;
BIACETOOH = IGNORE ;
ISOPBOOH = IGNORE ;
C61O2 = IGNORE ;
CO3C4NO3OH = IGNORE ;
C54O2 = IGNORE ;
TBUTOLNO3 = IGNORE ;
C56OH = IGNORE ;
IPROPOLO2H = IGNORE ;
MACROOA = IGNORE ;
MACROOH = IGNORE ;
HEX3ONBO2 = IGNORE ;
H2M2C3CHO = IGNORE ;
HEX3ONCOOH = IGNORE ;
NCRESO = IGNORE ;
COC4NO3OOH = IGNORE ;
PBZQO2 = IGNORE ;
PHXN = IGNORE ;
HO3C6NO3 = IGNORE ;
C63NO3 = IGNORE ;
C5DICARBO = IGNORE ;
CO2C5OH = IGNORE ;
MIPKAOOH = IGNORE ;
PBN = IGNORE ;
TBUTOLOOH = IGNORE ;
MALDIALO = IGNORE ;
NCRESO2 = IGNORE ;
CO35C5CHO = IGNORE ;
NPTLQO = IGNORE ;
HO3C6OOH = IGNORE ;
PHAN = IGNORE ;
C5CO23OOH = IGNORE ;
HO3C3CHO = IGNORE ;
ACO2H = IGNORE ;
CH3SO2O2 = IGNORE ;
PBZQONE = IGNORE ;
BUT2OL = IGNORE ;
MCATEC1O = IGNORE ;
MACO2H = IGNORE ;
NNCATECO2 = IGNORE ;
HO1C3OOH = IGNORE ;
PERPENACID = IGNORE ;
C33CO = IGNORE ;
C7CO4DB = IGNORE ;
TC4H9O = IGNORE ;
PHCOOH = IGNORE ;
HOIPRCO3H = IGNORE ;
MGLOOA = IGNORE ;
MGLOOB = IGNORE ;
ACRPAN = IGNORE ;
C4H9CO3 = IGNORE ;
NCRESOH = IGNORE ;
PEN2ONE1O2 = IGNORE ;
MMALANHY = IGNORE ;
ISOPCNO3 = IGNORE ;
C52O = IGNORE ;
MVK = IGNORE ;
IC3H7O = IGNORE ;
SC4H9O2 = IGNORE ;
HMVKBOOH = IGNORE ;
C510O2 = IGNORE ;
C61OOH = IGNORE ;
IPRHOCO3H = IGNORE ;
HOC4H8OH = IGNORE ;
CO23C54O = IGNORE ;
HM2C43NO3 = IGNORE ;
C51OOH = IGNORE ;
HO1C6OOH = IGNORE ;
H2M3C4O2 = IGNORE ;
DNCRESOOH = IGNORE ;
HEX3ONBOOH = IGNORE ;
HO2CO3C4O = IGNORE ;
HO2M2C4OOH = IGNORE ;
CRESOOH = IGNORE ;
C5CO2DBPAN = IGNORE ;
HEX2ONAOOH = IGNORE ;
HOIBUTCO3 = IGNORE ;
HOCH2CHO = IGNORE ;
C61OH = IGNORE ;
ISOPANO3 = IGNORE ;
PRNO3CO3H = IGNORE ;
C5CO2DCO3H = IGNORE ;
C5CO34CO3 = IGNORE ;
EPXDLPAN = IGNORE ;
C6H5CH2NO3 = IGNORE ;
C3H7CHO = IGNORE ;
C6CO2OHPAN = IGNORE ;
TLEMUCCO = IGNORE ;
NPHENO = IGNORE ;
CH3SOOOH = IGNORE ;
HO13C5 = IGNORE ;
EPXDLCO3H = IGNORE ;
NDNCRESOOH = IGNORE ;
C3MCODBCO3 = IGNORE ;
PRONO3AO = IGNORE ;
PRNO3PAN = IGNORE ;
IBUTOLOHC = IGNORE ;
IBUTOLOHB = IGNORE ;
CO14O3CHO = IGNORE ;
HOIPRCO3 = IGNORE ;
PEANO3 = IGNORE ;
HO1CO4C6 = IGNORE ;
HYPROPO2H = IGNORE ;
ISOPAO = IGNORE ;
C3DIOLO = IGNORE ;
TLOBIPEROH = IGNORE ;
MIPKBOH = IGNORE ;
C3MCODBCO2 = IGNORE ;
NC4MDCO2 = IGNORE ;
CH3SO2CHO = IGNORE ;
IPRHOCO3 = IGNORE ;
HO1C6O = IGNORE ;
MACRO = IGNORE ;
HC4CCO3H = IGNORE ;
MIPKBO2 = IGNORE ;
MGLYOOB = IGNORE ;
HO13C4OOH = IGNORE ;
MGLYOOA = IGNORE ;
PECOOH = IGNORE ;
TBUTOLO2 = IGNORE ;
H2M2C3CO3H = IGNORE ;
EPXDLCO3 = IGNORE ;
C6H5OOH = IGNORE ;
CH3CHOO = IGNORE ;
HO13CO4C5 = IGNORE ;
CO2C3PAN = IGNORE ;
MALDIALOOH = IGNORE ;
H13C43CO3 = IGNORE ;
C62O = IGNORE ;
NPXYFUO2 = IGNORE ;
CH3O2NO2 = IGNORE ;
HEX3ONCOH = IGNORE ;
ISOPDNO3 = IGNORE ;
HEX3ONAOOH = IGNORE ;
OXYL1OOH = IGNORE ;
CO3C5CHO = IGNORE ;
C62O2 = IGNORE ;
C23O3CCO2H = IGNORE ;
IBUTALOH = IGNORE ;
C32OH13CO = IGNORE ;
DMSO = IGNORE ;
CH3CO3H = IGNORE ;
DIEKBO = IGNORE ;
HEXCOH = IGNORE ;
C57O = IGNORE ;
HO3C5CO3H = IGNORE ;
CO3C5CO3H = IGNORE ;
MVKOHAO = IGNORE ;
NC4H9O = IGNORE ;
HO3C4O = IGNORE ;
HO134C5 = IGNORE ;
DIEKAOH = IGNORE ;
C6H5CO3H = IGNORE ;
BZEMUCNO3 = IGNORE ;
ISOPBNO3 = IGNORE ;
CH3CHOOA = IGNORE ;
ME2BUOLO = IGNORE ;
PTLQOH = IGNORE ;
CH3CHOOB = IGNORE ;
C2H5CHOOA = IGNORE ;
C4CHOBO2 = IGNORE ;
HOC6H4NO2 = IGNORE ;
BZFUO = IGNORE ;
C5PAN9 = IGNORE ;
C5PAN8 = IGNORE ;
NBUTOLAO = IGNORE ;
HEX3ONDOOH = IGNORE ;
C5PAN5 = IGNORE ;
C5PAN4 = IGNORE ;
HO13C5OOH = IGNORE ;
MALDIALCO2 = IGNORE ;
C5PAN3 = IGNORE ;
HEXAOH = IGNORE ;
BUTAL2O = IGNORE ;
HC4ACHO = IGNORE ;
CH4 = IGNORE ;
HOIPRCHO = IGNORE ;
IC4H10 = IGNORE ;
NC4CO3 = IGNORE ;
HO2C5O2 = IGNORE ;
HCOCH2O2 = IGNORE ;
HO2C5OH = IGNORE ;
H13CO2CO3 = IGNORE ;
NC3H7OOH = IGNORE ;
HEX2ONCO = IGNORE ;
TLEMUCNO3 = IGNORE ;
ACLOO = IGNORE ;
CO25C6O = IGNORE ;
HOCH2COCO2H = IGNORE ;
C2H5O = IGNORE ;
HCOCH2CO3 = IGNORE ;
HEXAO2 = IGNORE ;
HEX2ONBOOH = IGNORE ;
PEBOOH = IGNORE ;
MC3CODBCO3 = IGNORE ;
TLFUONOOA = IGNORE ;
OXYL1O2 = IGNORE ;
PTLQO2 = IGNORE ;
HO2CO4C5 = IGNORE ;
IC4H9OOH = IGNORE ;
BZBIPERNO3 = IGNORE ;
MIPKBNO3 = IGNORE ;
DIEKAO2 = IGNORE ;
PXYFUO = IGNORE ;
PROPALO = IGNORE ;
C5DIALOOH = IGNORE ;
DIEKAOOH = IGNORE ;
PRONO3BO2 = IGNORE ;
HCOOH = IGNORE ;
NPTLQOOH = IGNORE ;
PXYFUO2 = IGNORE ;
HCOCO2H = IGNORE ;
BZFUONE = IGNORE ;
ETHENO3O2 = IGNORE ;
C43NO34O2 = IGNORE ;
HEXCO2 = IGNORE ;
MACROHONO2 = IGNORE ;
MACROHONO3 = IGNORE ;
HCHO = IGNORE ;
HMVKAO2 = IGNORE ;
NC4DCO2 = IGNORE ;
CH3COCO3 = IGNORE ;
HEX3ONCO2 = IGNORE ;
MEKCOH = IGNORE ;
C5CO23CHO = IGNORE ;
BU1ENO3OOH = IGNORE ;
HEX3ONAO2 = IGNORE ;
PEAO = IGNORE ;
PBZQO = IGNORE ;
NCRES1O = IGNORE ;
H13CO2CO3H = IGNORE ;
IPRCHO = IGNORE ;
MALDALCO3H = IGNORE ;
CO23C5 = IGNORE ;
CO23C6 = IGNORE ;
HEX3ONDOH = IGNORE ;
TOL1O = IGNORE ;
CATECHOL = IGNORE ;
CH3SOO2 = IGNORE ;
IBUTOL = IGNORE ;
IPROPOLPER = IGNORE ;
DNCRESO = IGNORE ;
HO1C4NO3 = IGNORE ;
C4MDIAL = IGNORE ;
C4M2AL2OH = IGNORE ;
MIPKBO = IGNORE ;
C61O = IGNORE ;
PENTACID = IGNORE ;
C4CO2DBPAN = IGNORE ;
HO1C3NO3 = IGNORE ;
ALLYLOH = IGNORE ;
BU1ENO3O = IGNORE ;
M2BUOL2OH = IGNORE ;
C6CO3OHOOH = IGNORE ;
C5DICAROOH = IGNORE ;
HOCH2CO3 = IGNORE ;
TBUTOL = IGNORE ;
CRESO = IGNORE ;
MC3CODBPAN = IGNORE ;
CO24C6OOH = IGNORE ;
CH2OOG = IGNORE ;
CH2OOE = IGNORE ;
MEKAO2 = IGNORE ;
CH2OOC = IGNORE ;
CH2OOB = IGNORE ;
CH2OOA = IGNORE ;
CH3O = IGNORE ;
C23O3CCO3 = IGNORE ;
C510OH = IGNORE ;
NPHENO2 = IGNORE ;
HOBUT2CHO = IGNORE ;
CO23C4CO3H = IGNORE ;
HEX3ONDO2 = IGNORE ;
HO3C5CHO = IGNORE ;
PROL11MO2 = IGNORE ;
HO2C6O2 = IGNORE ;
HEX3ONAOH = IGNORE ;
MVKOHAOH = IGNORE ;
MALANHYO2 = IGNORE ;
HO2C6OOH = IGNORE ;
C63OOH = IGNORE ;
HO1C5O = IGNORE ;
TLEMUCCO3 = IGNORE ;
C514CO23OH = IGNORE ;
DIEKBOOH = IGNORE ;
ISOPDO2 = IGNORE ;
C510O = IGNORE ;
CH3OOH = IGNORE ;
BUT2OLO = IGNORE ;
MEKCO2 = IGNORE ;
NCRES1OOH = IGNORE ;
C3COCPAN = IGNORE ;
CO2C4CO2H = IGNORE ;
H2M2C3CO3 = IGNORE ;
PROPGLY = IGNORE ;
NBZFUO2 = IGNORE ;
TOL1OHNO2 = IGNORE ;
BZEMUCCO2H = IGNORE ;
CO24C53OOH = IGNORE ;
NO3CH2CO3 = IGNORE ;
NC4CHO = IGNORE ;
CO2HOC6OOH = IGNORE ;
C6CO3HO25 = IGNORE ;
NC4CO2H = IGNORE ;
HO2C4CO3H = IGNORE ;
MC3ODBCO2H = IGNORE ;
C5PAN13 = IGNORE ;
C54NO3 = IGNORE ;
CH3SOO = IGNORE ;
C53O = IGNORE ;
MIPKAOH = IGNORE ;
CO25C6O2 = IGNORE ;
CH3CHOHCHO = IGNORE ;
C43NO34O = IGNORE ;
NISOPNO3 = IGNORE ;
M2BUOL2OOH = IGNORE ;
HO1C4O2 = IGNORE ;
MVKOHBO2 = IGNORE ;
MGLOO = IGNORE ;
TLEMUCCO2H = IGNORE ;
BUTACID = IGNORE ;
PE2ONE1OOH = IGNORE ;
HC4ACO3 = IGNORE ;
PHENOH = IGNORE ;
C62OOH = IGNORE ;
PHENOL = IGNORE ;
NC4H9OOH = IGNORE ;
MVKOHAOOH = IGNORE ;
TLFUONOO = IGNORE ;
HOCO3C54O = IGNORE ;
MGLYOO = IGNORE ;
CO23C4CO3 = IGNORE ;
MACROHOOH = IGNORE ;
H13C43CO3H = IGNORE ;
IPECO = IGNORE ;
PHENO2 = IGNORE ;
C4CHOBNO3 = IGNORE ;
C6CO3HO14 = IGNORE ;
CO2H3CHO = IGNORE ;
CATECOOA = IGNORE ;
MMALNHYOOH = IGNORE ;
C4PAN5 = IGNORE ;
NC4H9O2 = IGNORE ;
MGLYOX = IGNORE ;
BZFUO2 = IGNORE ;
HODMSO2 = IGNORE ;
MIPKAO2 = IGNORE ;
CO25C6OH = IGNORE ;
C24O3CCO2H = IGNORE ;
MVKOHAO2 = IGNORE ;
PTLQOOH = IGNORE ;
HC4CCHO = IGNORE ;
MALDIALPAN = IGNORE ;
BUT2CO3 = IGNORE ;
CH3SO2 = IGNORE ;
CH3SO3 = IGNORE ;
C51OH = IGNORE ;
PROL1MCHO = IGNORE ;
NPHENOOH = IGNORE ;
CO23C65O = IGNORE ;
HEX3ONAO = IGNORE ;
C6H5O = IGNORE ;
MNNCATCOOH = IGNORE ;
NPHEN1OOH = IGNORE ;
ISOPDO = IGNORE ;
IBUTOLCO = IGNORE ;
HO1C3O2 = IGNORE ;
HCOC5 = IGNORE ;
HO2C43CO2H = IGNORE ;
MCATEC1OOH = IGNORE ;
C2H5CHO = IGNORE ;
C53OH = IGNORE ;
HEXBOH = IGNORE ;
C6COOHCO3H = IGNORE ;
DMSO2 = IGNORE ;
HEX2ONCOOH = IGNORE ;
SC4H9O = IGNORE ;
HEX3ONE = IGNORE ;
GAOO = IGNORE ;
PRPAL2CO2H = IGNORE ;
BZBIPEROOH = IGNORE ;
BZEMUCO2 = IGNORE ;
C5CO2OHCO3 = IGNORE ;
BUT2OLNO3 = IGNORE ;
HO13C4OH = IGNORE ;
ACCOMEPAN = IGNORE ;
HMGLOO = IGNORE ;
C23O3CPAN = IGNORE ;
CH3COCO2H = IGNORE ;
C57O2 = IGNORE ;
BUT2OLOH = IGNORE ;
CO2C54O = IGNORE ;
TLFUO2 = IGNORE ;
NOAOOA = IGNORE ;
C2OHOCOOH = IGNORE ;
HOHOC4DIAL = IGNORE ;
C56NO3 = IGNORE ;
HO3C4NO3 = IGNORE ;
TLEMUCCO3H = IGNORE ;
TLEMUCOOH = IGNORE ;
OCCOHCOH = IGNORE ;
C51O2 = IGNORE ;
PE2ENEBO = IGNORE ;
C6125CO = IGNORE ;
IBUALANO3 = IGNORE ;
BZFUOH = IGNORE ;
CO3C5CO3 = IGNORE ;
MPRKAO2 = IGNORE ;
C5PAN7 = IGNORE ;
C510OOH = IGNORE ;
MPRKAOH = IGNORE ;
NC6H14 = IGNORE ;
C5H8 = IGNORE ;
C5CO2OHPAN = IGNORE ;
C3PAN1 = IGNORE ;
C54O = IGNORE ;
MACROHO = IGNORE ;
HO2C4O2 = IGNORE ;
C59O2 = IGNORE ;
ACETOL = IGNORE ;
CH3C2H5O2 = IGNORE ;
IPROPOLO2 = IGNORE ;
A2PAN = IGNORE ;
CH3CO3 = IGNORE ;
HO13C5NO3 = IGNORE ;
C58OOH = IGNORE ;
HCOCOHCO3 = IGNORE ;
MC3ODBCO3H = IGNORE ;
NBUTOLBOOH = IGNORE ;
DIEKBO2 = IGNORE ;
NBUTOLBO = IGNORE ;
HO13C3CO3H = IGNORE ;
BZEMUCOOH = IGNORE ;
BUTALNO3 = IGNORE ;
NC4CO3H = IGNORE ;
BZEMUCCO3 = IGNORE ;
GLYPAN = IGNORE ;
TLFUOOH = IGNORE ;
HEX2ONAO2 = IGNORE ;
C23O3CHO = IGNORE ;
BZEMUCOH = IGNORE ;
HEXBO2 = IGNORE ;
HO13C5O2 = IGNORE ;
C5CO14CO2 = IGNORE ;
ME2BUOLOOH = IGNORE ;
DMSO2OH = IGNORE ;
C53O2 = IGNORE ;
CH3COCH2O2 = IGNORE ;
MACO3H = IGNORE ;
HO1C5NO3 = IGNORE ;
C6CO3HO4 = IGNORE ;
HMVKBO = IGNORE ;
CO23C65O2 = IGNORE ;
HO2C3CO3 = IGNORE ;
GAOOB = IGNORE ;
MEKCO = IGNORE ;
HOCO3C4OOH = IGNORE ;
CH3NO3 = IGNORE ;
MALDALCO2H = IGNORE ;
ISOPAOH = IGNORE ;
NPHEN1O = IGNORE ;
HO13C5O = IGNORE ;
HMVKANO3 = IGNORE ;
CO2HO4C6 = IGNORE ;
PHENOOH = IGNORE ;
MEKAOH = IGNORE ;
CH3COPAN = IGNORE ;
HO1CO3C5 = IGNORE ;
MACROHO2 = IGNORE ;
PAN = IGNORE ;
HOCOC4DIAL = IGNORE ;
BIACET = IGNORE ;
DMSO2O = IGNORE ;
HYPROPO = IGNORE ;
MALANHY2OH = IGNORE ;
BZEMUCCO3H = IGNORE ;
H13CO2CHO = IGNORE ;
ACO3B = IGNORE ;
HCOCO3H = IGNORE ;
HC4CCO2H = IGNORE ;
HO2C4CHO = IGNORE ;
NDNPHENOOH = IGNORE ;
BZFUOOH = IGNORE ;
PROL11MO = IGNORE ;
PERPROACID = IGNORE ;
MNCATECOOH = IGNORE ;
HO2C43CHO = IGNORE ;
ISOPCO2 = IGNORE ;
ME2BUOLO2 = IGNORE ;
BZEMUCPAN = IGNORE ;
BZFUCO = IGNORE ;
IPROPOLPAN = IGNORE ;
HNO3 = IGNORE ;
HO2C43CO3H = IGNORE ;
HYETHO2H = IGNORE ;
NCATECO = IGNORE ;
C5PAN2 = IGNORE ;
C5H11CO3H = IGNORE ;
CO2HOC61O2 = IGNORE ;
MPRKBOOH = IGNORE ;
MALDIALCO3 = IGNORE ;
ETHOHNO3 = IGNORE ;
GLYOO = IGNORE ;
PPEN = IGNORE ;
C6CO34O2 = IGNORE ;
HO13C3CHO = IGNORE ;
ISOPAO2 = IGNORE ;
HOCHOCOOH = IGNORE ;
NC4H10 = IGNORE ;
BZFUONOO = IGNORE ;
IC4H9O = IGNORE ;
A2PANOO = IGNORE ;
MEKBO2 = IGNORE ;
HOIBUTCHO = IGNORE ;
GLYOX = IGNORE ;
HO2C43CO3 = IGNORE ;
HC4CCO3 = IGNORE ;
HO13C3CO3 = IGNORE ;
C3COCCHO = IGNORE ;
C3H6 = IGNORE ;
IPEBOH = IGNORE ;
C54CO = IGNORE ;
CO25C6 = IGNORE ;
C57OH = IGNORE ;
PROL1MCO3 = IGNORE ;
CRESOH = IGNORE ;
C523OH = IGNORE ;
C5H11CO3 = IGNORE ;
CRESOL = IGNORE ;
C53OOH = IGNORE ;
C3H8 = IGNORE ;
MECOACEOOH = IGNORE ;
HO1C5O2 = IGNORE ;
DMS = IGNORE ;
TC4H9NO3 = IGNORE ;
HO2M2C4O = IGNORE ;
CO23C4NO3 = IGNORE ;
C57OOH = IGNORE ;
C6CO134PAN = IGNORE ;
MCATECOOA = IGNORE ;
PBZQCO = IGNORE ;
CH2OO = IGNORE ;
CH3SO2OOH = IGNORE ;
HOBUT2CO3 = IGNORE ;
CH3CHOHCO3 = IGNORE ;
C23O3CCHO = IGNORE ;
HO3C4O2 = IGNORE ;
C6CO3OH5O = IGNORE ;
CO3C4CO2H = IGNORE ;
BZEPOXMUC = IGNORE ;
C3DIALOOH = IGNORE ;
HO1C4O = IGNORE ;
CH3SCH2OOH = IGNORE ;
C5CO14O2 = IGNORE ;
C3DIALO2 = IGNORE ;
HO14CO3C5 = IGNORE ;
CH3COCH2O = IGNORE ;
MPRKNO3 = IGNORE ;
NBUTOLANO3 = IGNORE ;
C5PAN19 = IGNORE ;
C5PAN18 = IGNORE ;
CO23C54OOH = IGNORE ;
PXYFUOOH = IGNORE ;
C5PAN11 = IGNORE ;
CO2C43CHO = IGNORE ;
HO2C4CO2H = IGNORE ;
C5PAN12 = IGNORE ;
C5CO14OH = IGNORE ;
C5PAN14 = IGNORE ;
C5PAN17 = IGNORE ;
C5PAN16 = IGNORE ;
PHENO = IGNORE ;
HOC3H6CO3H = IGNORE ;
PTLQCO = IGNORE ;
C6CO34O = IGNORE ;
C2H6 = IGNORE ;
C2H4 = IGNORE ;
IBUTDIAL = IGNORE ;
C2H2 = IGNORE ;
CO23C4CHO = IGNORE ;
HO1C6O2 = IGNORE ;
TLBIPERO2 = IGNORE ;
C6CO2OHCO3 = IGNORE ;
HO3C3PAN = IGNORE ;
NISOPOOH = IGNORE ;
C54OOH = IGNORE ;
HO3C4CO3 = IGNORE ;
HO14CO2C5 = IGNORE ;
CRESO2 = IGNORE ;
HO3C4OOH = IGNORE ;
CH3SO4NO2 = IGNORE ;
CO2C54O2 = IGNORE ;
HCOCH2O = IGNORE ;
IPEBO2 = IGNORE ;
BZEMUCCO = IGNORE ;
CO2HO3C6 = IGNORE ;
IBUDIALCO3 = IGNORE ;
HEXCO = IGNORE ;
C41CO3 = IGNORE ;
HO13M2C4 = IGNORE ;
ME2BUOLNO3 = IGNORE ;
C52OOH = IGNORE ;
C5CO23O = IGNORE ;
C5PAN1 = IGNORE ;
C6CO34HO1 = IGNORE ;
NBZFUO = IGNORE ;
C4CHOBO = IGNORE ;
CO3C4CHO = IGNORE ;
IC3H7OOH = IGNORE ;
HO1C4OOH = IGNORE ;
HO13C4NO3 = IGNORE ;
C6H5O2 = IGNORE ;
NBUTOLBNO3 = IGNORE ;
HOCH2COCHO = IGNORE ;
IBUTACID = IGNORE ;
NTLFUO = IGNORE ;
BIACETO = IGNORE ;
BUTALO2H = IGNORE ;
PEBO = IGNORE ;
C56O2 = IGNORE ;
H1CO23CHO = IGNORE ;
C41CO2H = IGNORE ;
C3DIOLO2 = IGNORE ;
NO3CH2CHO = IGNORE ;
HEX2ONANO3 = IGNORE ;
NMGLYOX = IGNORE ;
NC4H9NO3 = IGNORE ;
NC3H7O2 = IGNORE ;
HEX2ONAO = IGNORE ;
ISOPCO = IGNORE ;
CO2C4CO3H = IGNORE ;
NO3CH2CO2H = IGNORE ;
CO = IGNORE ;
PGLYOX = IGNORE ;
PBZQOH = IGNORE ;
CL = IGNORE ;
C5CO14OOH = IGNORE ;
HOIBUTCO3H = IGNORE ;
HO3C3CO3H = IGNORE ;
MEKCOOH = IGNORE ;
HCOCO3 = IGNORE ;
HOCH2CH2O = IGNORE ;
HOBUT2CO3H = IGNORE ;
MCATECHOL = IGNORE ;
C52O2 = IGNORE ;
C42AOH = IGNORE ;
M2PROPAL2O = IGNORE ;
MIPKAO = IGNORE ;
CO3C4CO3H = IGNORE ;
C51NO3 = IGNORE ;
HC4ACO2H = IGNORE ;
C53OH2OOH = IGNORE ;
M2BUOL2NO3 = IGNORE ;
C42CO3 = IGNORE ;
BZBIPERO = IGNORE ;
HO3C5OOH = IGNORE ;
HOC3H6OH = IGNORE ;
EPXC4DIAL = IGNORE ;
MECOACETO2 = IGNORE ;
PXYFUOH = IGNORE ;
HO14CO2C4 = IGNORE ;
CH3SCHO = IGNORE ;
BUT2OLO2 = IGNORE ;
DNPHENO2 = IGNORE ;
HO3C5CO3 = IGNORE ;
M2BU2OLNO3 = IGNORE ;
MVKO = IGNORE ;
CH3SCH2O = IGNORE ;
TC4H9O2 = IGNORE ;
HO2C3CO2H = IGNORE ;
HCOCH2OOH = IGNORE ;
MCOCOMOOOH = IGNORE ;
CO2C3CO3H = IGNORE ;
NDNCRESO = IGNORE ;
MEKBOOH = IGNORE ;
C2OHOCO2H = IGNORE ;
ISOPBOH = IGNORE ;
CO2HOC61O = IGNORE ;
ACCOMECO3H = IGNORE ;
H13C43CHO = IGNORE ;
HM2C43O = IGNORE ;
PPN = IGNORE ;
CO3C4NO3O = IGNORE ;
CATEC1OOH = IGNORE ;
HOC2H4CHO = IGNORE ;
MCOCOMOXO = IGNORE ;
ISOPDOH = IGNORE ;
C58O2 = IGNORE ;
NBZFUONE = IGNORE ;
MSIA = IGNORE ;
MC3CODBCO2 = IGNORE ;
H2M3C4O = IGNORE ;
A2PANO = IGNORE ;
NO3CH2CO3H = IGNORE ;
CO2C4DIAL = IGNORE ;
IBUTOLBO = IGNORE ;
IBUTOLCO2H = IGNORE ;
HOBUT2CO2H = IGNORE ;
NCRES1O2 = IGNORE ;
HO12CO3C4 = IGNORE ;
C58OH = IGNORE ;
CATEC1O2 = IGNORE ;
IPEBOOH = IGNORE ;
IC5H12 = IGNORE ;
SO3 = IGNORE ;
SO2 = IGNORE ;
CHOCOHONO2 = IGNORE ;
MALANHYO = IGNORE ;
HO3C3CO3 = IGNORE ;
DNPHEN = IGNORE ;
BUT2CHO = IGNORE ;
ISOPBO2 = IGNORE ;
HO2C3CHO = IGNORE ;
CATEC1O = IGNORE ;
HO3C6O2 = IGNORE ;
MPAN = IGNORE ;
C43NO34OOH = IGNORE ;
PRPAL2CO3H = IGNORE ;
PR2O2HNO3 = IGNORE ;
HO1C5OOH = IGNORE ;
C3DIOLOOH = IGNORE ;
C2H5NO3 = IGNORE ;
HMVKAOOH = IGNORE ;
BUT1ENE = IGNORE ;
MVKOHBO = IGNORE ;
HO3C6O = IGNORE ;
ME2BU2OLO2 = IGNORE ;
HCOCOHCO3H = IGNORE ;
NPTLQO2 = IGNORE ;
PERIBUACID = IGNORE ;
C63O2 = IGNORE ;
BZBIPERO2 = IGNORE ;
IPECOH = IGNORE ;
MALNHYOHCO = IGNORE ;
C5COOHCO3H = IGNORE ;
C2H5O2 = IGNORE ;
CO24C6 = IGNORE ;
CO24C5 = IGNORE ;
C5134CO2OH = IGNORE ;
CH3OH = IGNORE ;
HO3C5O2 = IGNORE ;
BIACETO2 = IGNORE ;
IPECOOH = IGNORE ;
NC4DCO2H = IGNORE ;
IPEAOH = IGNORE ;
CO235C6 = IGNORE ;
IBUDIALPAN = IGNORE ;
O3 = IGNORE ;
PECO = IGNORE ;
CO25C6OOH = IGNORE ;
PERBUACID = IGNORE ;
CO24C53O = IGNORE ;
HEX2ONBO2 = IGNORE ;
HOCH2CO3H = IGNORE ;
C6H5CH2O = IGNORE ;
ACLOOA = IGNORE ;
NC4MDCO2H = IGNORE ;
CO3C5CO2H = IGNORE ;
NBUTOLAO2 = IGNORE ;
DIEKAO = IGNORE ;
NNCATECO = IGNORE ;
C2H5CO3 = IGNORE ;
IBUTALBO2H = IGNORE ;
C615CO2O2 = IGNORE ;
TOLUENE = IGNORE ;
NDNCRESO2 = IGNORE ;
HEXAOOH = IGNORE ;
C615CO2OH = IGNORE ;
HO3C4CHO = IGNORE ;
IPEAOOH = IGNORE ;
NBUTOLAOH = IGNORE ;
NBUTOLAOOH = IGNORE ;
HEXCOOH = IGNORE ;
HEX2ONCO2 = IGNORE ;
C6CO23HO5 = IGNORE ;
C6CO134 = IGNORE ;
C6H5CO3 = IGNORE ;
NCATECO2 = IGNORE ;
MCATEC1O2 = IGNORE ;
CH3COCO3H = IGNORE ;
TC4H9OOH = IGNORE ;
OH = IGNORE ;
GLYOOB = IGNORE ;
PR1O2HNO3 = IGNORE ;
CH3O2 = IGNORE ;
GLYOOA = IGNORE ;
IPEAO2 = IGNORE ;
C4CO2DBCO3 = IGNORE ;
C2H5OH = IGNORE ;
IPECO2 = IGNORE ;
GLYOOC = IGNORE ;
MCOCOMOXO2 = IGNORE ;
DMSO2OOH = IGNORE ;
DNPHENOOH = IGNORE ;
C4CHOBOOH = IGNORE ;
C4PAN2 = IGNORE ;
C51O = IGNORE ;
MSA = IGNORE ;
ME2BU2OLO = IGNORE ;
TLEMUCO2 = IGNORE ;
PXYFUONE = IGNORE ;
C6CO3OH5O2 = IGNORE ;
HOC3H6CO3 = IGNORE ;
PE2ENEBNO3 = IGNORE ;
MNCATECH = IGNORE ;
NDNPHENO2 = IGNORE ;
HEXBOOH = IGNORE ;
PROL11MOOH = IGNORE ;
PTLQO = IGNORE ;
HYPROPO2 = IGNORE ;
C41CO3H = IGNORE ;
NBZQOOH = IGNORE ;
C52OH = IGNORE ;
IBUTOLBNO3 = IGNORE ;
MVKO2 = IGNORE ;
HO2C4O = IGNORE ;
MEKANO3 = IGNORE ;
CH3SCH2O2 = IGNORE ;
C6H5CH2OH = IGNORE ;
MPRKAO = IGNORE ;
C59OOH = IGNORE ;
HOCO3C5OOH = IGNORE ;
CO3C4CO3 = IGNORE ;
HOCH2CH2O2 = IGNORE ;
PEAOH = IGNORE ;
H2M3C4NO3 = IGNORE ;
C3PAN2 = IGNORE ;
IC3H7NO3 = IGNORE ;
BUTAL2NO3 = IGNORE ;
C4PAN4 = IGNORE ;
METACETHO = IGNORE ;
C6PAN2 = IGNORE ;
HEX3ONDO = IGNORE ;
MEKBO = IGNORE ;
PEAO2 = IGNORE ;
OCCOHCO2 = IGNORE ;
IPEAO = IGNORE ;
MPRKAOOH = IGNORE ;
C6PAN1 = IGNORE ;
HOC2H4CO3H = IGNORE ;
MVKOH = IGNORE ;
C5CO2DBCO3 = IGNORE ;
ACO3 = IGNORE ;
HMVKAO = IGNORE ;
CH3SCH2OH = IGNORE ;
C6H5CH2O2 = IGNORE ;
PROLNO3 = IGNORE ;
MVKOO = IGNORE ;
TLFUOH = IGNORE ;
C52NO3 = IGNORE ;
BUT2CO3H = IGNORE ;
H2 = IGNORE ;
PROL1MPAN = IGNORE ;
HO1CO34C5 = IGNORE ;
CHOMOHCO3 = IGNORE ;
SC4H9OOH = IGNORE ;
TLEMUCO = IGNORE ;
HO2CO5C6 = IGNORE ;
TLEMUCOH = IGNORE ;
HEX3ONCO = IGNORE ;
NCRESOOH = IGNORE ;
OCCOHCO = IGNORE ;
TLBIPEROOH = IGNORE ;
C5DICARB = IGNORE ;
CO2C3CO3 = IGNORE ;
HO1CO3C4O2 = IGNORE ;
HEXANO3 = IGNORE ;
CHOMOHPAN = IGNORE ;
IC4H9O2 = IGNORE ;
NNCATECOOH = IGNORE ;
TLFUO = IGNORE ;
CO23C54O2 = IGNORE ;
ACR = IGNORE ;
HOC2H4CO3 = IGNORE ;
DNPHENO = IGNORE ;
MMALNHY2OH = IGNORE ;
C2H5OOH = IGNORE ;
HO2C6NO3 = IGNORE ;
C63O = IGNORE ;
HO13C4O = IGNORE ;
HO2C3CO3H = IGNORE ;
PEN2ONE1O = IGNORE ;
PECO2 = IGNORE ;
NO = IGNORE ;
HO2C4NO3 = IGNORE ;
PE2ENEBO2 = IGNORE ;
HC4ACO3H = IGNORE ;
PBZN = IGNORE ;
ACCOMECO3 = IGNORE ;
TLFUONE = IGNORE ;
C4CO2DCO3H = IGNORE ;
PIPN = IGNORE ;
C4M2ALOHO2 = IGNORE ;
IPEBNO3 = IGNORE ;
EGLYOX = IGNORE ;
CH3CO2H = IGNORE ;
MVKOOH = IGNORE ;
HO14C6 = IGNORE ;
CH3SO = IGNORE ;
HO13C4O2 = IGNORE ;
BIACETOH = IGNORE ;
IPEANO3 = IGNORE ;
MVKOOA = IGNORE ;
CO2C3CHO = IGNORE ;
HOCO4C5OOH = IGNORE ;
HOC3H6CO2H = IGNORE ;
NISOPO = IGNORE ;
DIEK = IGNORE ;
DNCRES = IGNORE ;
C61NO3 = IGNORE ;
C5DIALCO = IGNORE ;
C615CO2OOH = IGNORE ;
CO23C3CHO = IGNORE ;
HO2C4CO3 = IGNORE ;
PECOH = IGNORE ;
TLEPOXMUC = IGNORE ;
PRNO3CO3 = IGNORE ;
MNCATECO2 = IGNORE ;
BUT2OLOOH = IGNORE ;
NOAOO = IGNORE ;
M2BUOL2O2 = IGNORE ;
CO24C53O2 = IGNORE ;
HO25C6 = IGNORE ;
HCOCH2CO3H = IGNORE ;
NPHEN1O2 = IGNORE ;
OCCOHCOOH = IGNORE ;
MEK = IGNORE ;
C6CO34OOH = IGNORE ;
C6CO134OOH = IGNORE ;
C6HOCOOOH = IGNORE ;
NCATECOOH = IGNORE ;
NBUTOLBO2 = IGNORE ;
CO2H3CO3 = IGNORE ;
MNNCATECO = IGNORE ;
HO2CO4CHO = IGNORE ;
MNCATECO = IGNORE ;
TLEMUCPAN = IGNORE ;
C56OOH = IGNORE ;
C4MALOHOOH = IGNORE ;
HO2M2C4O2 = IGNORE ;
BZOBIPEROH = IGNORE ;
PROPOLNO3 = IGNORE ;
HO3C4CO3H = IGNORE ;
H14CO23C4 = IGNORE ;
HO2C5OOH = IGNORE ;
HO2M2C4NO3 = IGNORE ;
MVKOHBOOH = IGNORE ;
HM2C43OOH = IGNORE ;
CO2C4CO3 = IGNORE ;
HOIPRGLYOX = IGNORE ;
HOC3H6CHO = IGNORE ;
CHOMOHCO3H = IGNORE ;
C5H11CHO = IGNORE ;
HO1C6NO3 = IGNORE ;
CO24C6O2 = IGNORE ;
HEX3ONDNO3 = IGNORE ;
HO2 = IGNORE ;
C3H7CO3 = IGNORE ;
IPRCO3 = IGNORE ;
NISOPO2 = IGNORE ;
MIPKBOOH = IGNORE ;
C5CO23O2 = IGNORE ;
CH3SOO2NO2 = IGNORE ;
HEXCNO3 = IGNORE ;
NTLFUOOH = IGNORE ;
PRNO3CO2H = IGNORE ;
MACR = IGNORE ;
HEXBO = IGNORE ;
C42CHO = IGNORE ;
MACO3 = IGNORE ;
HCOCOHPAN = IGNORE ;
BENZAL = IGNORE ;
HEX2ONBO = IGNORE ;
C4M2ALOHO = IGNORE ;
BZBIPER2OH = IGNORE ;
DNCRESO2 = IGNORE ;
IBUTALBO2 = IGNORE ;
HO2C5O = IGNORE ;
HO3C5NO3 = IGNORE ;
NPHENOH = IGNORE ;
HO2C5NO3 = IGNORE ;
C4PAN10 = IGNORE ;
NO3CH2PAN = IGNORE ;
C4CODBCO3H = IGNORE ;
IPECNO3 = IGNORE ;
MMALANHYO = IGNORE ;
C23O3CCO3H = IGNORE ;
CH3COCH3 = IGNORE ;
IBUTALCO2 = IGNORE ;
PBZQOOH = IGNORE ;
ACCOMECHO = IGNORE ;
CO3C4NO3 = IGNORE ;
IBUTALBO = IGNORE ;
MALDIALO2 = IGNORE ;
HO2M2C4OH = IGNORE ;
C5DIALO = IGNORE ;
PECNO3 = IGNORE ;
CO24C6O = IGNORE ;
C3MDIALOH = IGNORE ;
C61CO = IGNORE ;
ISOPBO = IGNORE ;
C58O = IGNORE ;
{ Peroxy radicals. }
{ WARNING: The following species do not have SMILES strings in the database. 
          If any of these are peroxy radicals the RO2 sum will be wrong. 
   CATECOOA MCATECOOA }
#INLINE F90_RCONST 
 USE constants
 !end of USE statements 
 !
 ! start of executable statements
 RO2 = & 
 C(ind_CH3CO3) + C(ind_CH3O2) + C(ind_C2H5O2) + C(ind_NC3H7O2) + & 
   C(ind_IC3H7O2) + C(ind_NC4H9O2) + C(ind_SC4H9O2) + C(ind_IC4H9O2) + &  
   C(ind_TC4H9O2) + C(ind_PEAO2) + C(ind_PEBO2) + C(ind_PECO2) + &  
   C(ind_IPEAO2) + C(ind_IPEBO2) + C(ind_IPECO2) + C(ind_HEXAO2) + &  
   C(ind_HEXBO2) + C(ind_HEXCO2) + C(ind_HOCH2CH2O2) + C(ind_ETHENO3O2) + &  
   C(ind_HYPROPO2) + C(ind_IPROPOLO2) + C(ind_PRONO3BO2) + &  
   C(ind_PRONO3AO2) + C(ind_NBUTOLAO2) + C(ind_HO3C4O2) + &  
   C(ind_BU1ENO3O2) + C(ind_C43NO34O2) + C(ind_BZBIPERO2) + &  
   C(ind_C6H5CH2O2) + C(ind_TLBIPERO2) + C(ind_ISOPAO2) + C(ind_ISOPBO2) &  
   + C(ind_ISOPCO2) + C(ind_ISOPDO2) + C(ind_NISOPO2) + C(ind_CH3COCH2O2) &  
   + C(ind_HODMSO2) + C(ind_CH3SCH2O2) + C(ind_C2H5CO3) + C(ind_HCOCO3) + &  
   C(ind_BZEMUCO2) + C(ind_BZEMUCCO3) + C(ind_C5DIALO2) + C(ind_PHENO2) + &  
   C(ind_NPHENO2) + C(ind_TLEMUCO2) + C(ind_TLEMUCCO3) + C(ind_C615CO2O2) &  
   + C(ind_CRESO2) + C(ind_NCRESO2) + C(ind_HMVKAO2) + C(ind_HMVKBO2) + &  
   C(ind_MVKO2) + C(ind_MACROHO2) + C(ind_MACRO2) + C(ind_MACO3) + &  
   C(ind_HO1C3O2) + C(ind_NBUTOLBO2) + C(ind_BUTALO2) + C(ind_C3H7CO3) + &  
   C(ind_HO1C4O2) + C(ind_BUT2OLO2) + C(ind_MEKAO2) + C(ind_MEKCO2) + &  
   C(ind_MEKBO2) + C(ind_IBUTOLBO2) + C(ind_IBUTOLCO2) + C(ind_IBUTALBO2) &  
   + C(ind_IBUTALCO2) + C(ind_IPRCO3) + C(ind_TBUTOLO2) + C(ind_C4CHOBO2) &  
   + C(ind_C4H9CO3) + C(ind_HO1C5O2) + C(ind_MPRKAO2) + C(ind_CO2C54O2) + &  
   C(ind_HO2C5O2) + C(ind_DIEKAO2) + C(ind_DIEKBO2) + C(ind_PE2ENEBO2) + &  
   C(ind_HO3C5O2) + C(ind_M2BUOL2O2) + C(ind_HM2C43O2) + C(ind_BUT2CO3) + &  
   C(ind_C52O2) + C(ind_ME2BUOLO2) + C(ind_H2M3C4O2) + C(ind_MIPKAO2) + &  
   C(ind_MIPKBO2) + C(ind_ME2BU2OLO2) + C(ind_PROL11MO2) + &  
   C(ind_HO2M2C4O2) + C(ind_C5H11CO3) + C(ind_HO1C6O2) + C(ind_HEX2ONAO2) &  
   + C(ind_HEX2ONBO2) + C(ind_HEX2ONCO2) + C(ind_HO2C6O2) + &  
   C(ind_HO3C6O2) + C(ind_HEX3ONDO2) + C(ind_HEX3ONCO2) + &  
   C(ind_HEX3ONBO2) + C(ind_HEX3ONAO2) + C(ind_HOCH2CO3) + &  
   C(ind_NO3CH2CO3) + C(ind_CH3CHOHCO3) + C(ind_PRNO3CO3) + &  
   C(ind_HO3C3CO3) + C(ind_CO3C4NO3O2) + C(ind_MALDIALCO3) + &  
   C(ind_EPXDLCO3) + C(ind_C3DIALO2) + C(ind_MALDIALO2) + C(ind_C6H5O2) + &  
   C(ind_C6H5CO3) + C(ind_C5CO14O2) + C(ind_OXYL1O2) + C(ind_C58O2) + &  
   C(ind_HC4ACO3) + C(ind_HC4CCO3) + C(ind_C57O2) + C(ind_C59O2) + &  
   C(ind_NC4CO3) + C(ind_C510O2) + C(ind_CH3C2H5O2) + C(ind_DMSO2O2) + &  
   C(ind_BZFUO2) + C(ind_NBZFUO2) + C(ind_HCOCOHCO3) + C(ind_CATEC1O2) + &  
   C(ind_TLFUO2) + C(ind_NTLFUO2) + C(ind_C5DICARBO2) + C(ind_MC3CODBCO3) &  
   + C(ind_C4M2ALOHO2) + C(ind_C3MCODBCO3) + C(ind_MCATEC1O2) + &  
   C(ind_MVKOHBO2) + C(ind_MVKOHAO2) + C(ind_CO2H3CO3) + C(ind_ACO3) + &  
   C(ind_CHOMOHCO3) + C(ind_CH3SOO) + C(ind_HOC2H4CO3) + C(ind_HCOCH2O2) &  
   + C(ind_CO2C3CO3) + C(ind_HO2C3CO3) + C(ind_HOC3H6CO3) + &  
   C(ind_HO1CO3C4O2) + C(ind_BIACETO2) + C(ind_HOIPRCO3) + &  
   C(ind_IBUDIALCO3) + C(ind_PROPALO2) + C(ind_IPRHOCO3) + &  
   C(ind_CO3C4CO3) + C(ind_HO3C4CO3) + C(ind_C51O2) + C(ind_CO23C54O2) + &  
   C(ind_HO2CO4C5O2) + C(ind_CO24C53O2) + C(ind_HO2C4CO3) + &  
   C(ind_HO2C4O2) + C(ind_HOCO3C54O2) + C(ind_HO13C5O2) + &  
   C(ind_HOIBUTCO3) + C(ind_HO2C43CO3) + C(ind_C56O2) + C(ind_C53O2) + &  
   C(ind_C41CO3) + C(ind_PROL1MCO3) + C(ind_H2M2C3CO3) + C(ind_C54O2) + &  
   C(ind_C63O2) + C(ind_CO2HOC61O2) + C(ind_CO24C6O2) + C(ind_CO25C6O2) + &  
   C(ind_C61O2) + C(ind_CO23C65O2) + C(ind_HO3C5CO3) + C(ind_C6HO1CO3O2) &  
   + C(ind_C3COCCO3) + C(ind_PEN2ONE1O2) + C(ind_C6CO34O2) + &  
   C(ind_C6CO3OH5O2) + C(ind_NPHEN1O2) + C(ind_PBZQO2) + C(ind_NBZQO2) + &  
   C(ind_NCATECO2) + C(ind_NNCATECO2) + C(ind_MECOACETO2) + &  
   C(ind_PXYFUO2) + C(ind_MCOCOMOXO2) + C(ind_NPXYFUO2) + C(ind_NCRES1O2) &  
   + C(ind_PTLQO2) + C(ind_NPTLQO2) + C(ind_MNCATECO2) + &  
   C(ind_MNNCATECO2) + C(ind_CH3SOO2) + C(ind_CO2C4CO3) + &  
   C(ind_HOBUT2CO3) + C(ind_CO3C5CO3) + C(ind_MALANHYO2) + &  
   C(ind_DNPHENO2) + C(ind_NDNPHENO2) + C(ind_DNCRESO2) + &  
   C(ind_NDNCRESO2) + C(ind_H13CO2CO3) + C(ind_ACO3B) + C(ind_OCCOHCO2) + &  
   C(ind_CH3SO2O2) + C(ind_HO13C4O2) + C(ind_C42CO3) + C(ind_H13C43CO3) + &  
   C(ind_C62O2) + C(ind_C5CO2OHCO3) + C(ind_ACCOMECO3) + &  
   C(ind_MMALANHYO2) + C(ind_CH3COCO3) + C(ind_C6CO2OHCO3) + &  
   C(ind_CO23C4CO3) + C(ind_HCOCH2CO3) + C(ind_C5CO34CO3) + &  
   C(ind_C4CO2DBCO3) + C(ind_C23O3CCO3) + C(ind_C5CO2DBCO3) + &  
   C(ind_A2PANOO) + C(ind_HO13C3CO3) + C(ind_C5CO23O2) + C(ind_C3DIOLO2 ) 
 CALL mcm_constants(time, temp, M, N2, O2, RO2, H2O) 
 #ENDINLINE 
{above lines go into the SUBROUTINES UPDATE_RCONST and UPDATE_PHOTO}
#EQUATIONS
{1.} 	 CH3OH + OH = HO2 + HCHO : 	6.01D-18*TEMP**2*EXP(170/TEMP) 	;
{2.} 	 OH + CH3CHO = CH3CO3 : 	4.40D-12*EXP(365/TEMP) 	;
{3.} 	 CH3CHO = CH3O2 + HO2 + CO : 	J(13) 	;
{4.} 	 NO3 + CH3CHO = HNO3 + CH3CO3 : 	KNO3AL 	;
{5.} 	 OH + CH4 = CH3O2 : 	2.45D-12*EXP(-1775/TEMP) 	;
{6.} 	 CL + CH4 = CH3O2 : 	9.60D-12*EXP(-1350/TEMP) 	;
{7.} 	 OH + C2H6 = C2H5O2 : 	1.52D-17*TEMP**2*EXP(-498/TEMP) 	;
{8.} 	 CL + C2H6 = C2H5O2 : 	8.10D-11*EXP(-95/TEMP) 	;
{9.} 	 OH + C3H8 = NC3H7O2 : 	1.55D-17*TEMP**2*EXP(-61/TEMP)*0.264 	;
{10.} 	 OH + C3H8 = IC3H7O2 : 	1.55D-17*TEMP**2*EXP(-61/TEMP)*0.736 	;
{11.} 	 CL + C3H8 = NC3H7O2 : 	1.20D-10*EXP(40/TEMP)*0.386 	;
{12.} 	 CL + C3H8 = IC3H7O2 : 	1.20D-10*EXP(40/TEMP)*0.614 	;
{13.} 	 OH + NC4H10 = NC4H9O2 : 	1.69D-17*TEMP**2*EXP(145/TEMP)*0.127 	;
{14.} 	 OH + NC4H10 = SC4H9O2 : 	1.69D-17*TEMP**2*EXP(145/TEMP)*0.873 	;
{15.} 	 CL + NC4H10 = NC4H9O2 : 	2.18D-10*0.285 	;
{16.} 	 CL + NC4H10 = SC4H9O2 : 	2.18D-10*0.715 	;
{17.} 	 OH + IC4H10 = IC4H9O2 : 	1.16D-17*TEMP**2*EXP(225/TEMP)*0.206 	;
{18.} 	 OH + IC4H10 = TC4H9O2 : 	1.16D-17*TEMP**2*EXP(225/TEMP)*0.794 	;
{19.} 	 CL + IC4H10 = IC4H9O2 : 	1.43D-10*0.564 	;
{20.} 	 CL + IC4H10 = TC4H9O2 : 	1.43D-10*0.436 	;
{21.} 	 OH + NC5H12 = PEAO2 : 	2.44D-17*TEMP**2*EXP(183/TEMP)*0.083 	;
{22.} 	 OH + NC5H12 = PEBO2 : 	2.44D-17*TEMP**2*EXP(183/TEMP)*0.568 	;
{23.} 	 OH + NC5H12 = PECO2 : 	2.44D-17*TEMP**2*EXP(183/TEMP)*0.349 	;
{24.} 	 CL + NC5H12 = PEAO2 : 	2.80D-10*0.222 	;
{25.} 	 CL + NC5H12 = PEBO2 : 	2.80D-10*0.558 	;
{26.} 	 CL + NC5H12 = PECO2 : 	2.80D-10*0.220 	;
{27.} 	 OH + IC5H12 = IPEAO2 : 	3.70D-12*0.087 	;
{28.} 	 OH + IC5H12 = IPEBO2 : 	3.70D-12*0.297 	;
{29.} 	 OH + IC5H12 = IPECO2 : 	3.70D-12*0.616 	;
{30.} 	 CL + IC5H12 = IPEAO2 : 	2.20D-10*0.408 	;
{31.} 	 CL + IC5H12 = IPEBO2 : 	2.20D-10*0.342 	;
{32.} 	 CL + IC5H12 = IPECO2 : 	2.20D-10*0.250 	;
{33.} 	 OH + NC6H14 = HEXAO2 : 	1.53D-17*TEMP**2*EXP(414/TEMP)*0.061 	;
{34.} 	 OH + NC6H14 = HEXBO2 : 	1.53D-17*TEMP**2*EXP(414/TEMP)*0.421 	;
{35.} 	 OH + NC6H14 = HEXCO2 : 	1.53D-17*TEMP**2*EXP(414/TEMP)*0.518 	;
{36.} 	 CL + NC6H14 = HEXAO2 : 	3.40D-10*0.182 	;
{37.} 	 CL + NC6H14 = HEXBO2 : 	3.40D-10*0.457 	;
{38.} 	 CL + NC6H14 = HEXCO2 : 	3.40D-10*0.361 	;
{39.} 	 C2H4 + OH = HOCH2CH2O2 : 	KMT15 	;
{40.} 	 C2H4 + NO3 = ETHENO3O2 : 	2.10D-16 	;
{41.} 	 C2H4 + O3 = HCHO + CH2OOA : 	9.14D-15*EXP(-2580/TEMP) 	;
{42.} 	 OH + C3H6 = HYPROPO2 : 	KMT16*0.87 	;
{43.} 	 OH + C3H6 = IPROPOLO2 : 	KMT16*0.13 	;
{44.} 	 O3 + C3H6 = CH3CHOOA + HCHO : 	5.51D-15*EXP(-1878/TEMP)*0.5 	;
{45.} 	 O3 + C3H6 = CH2OOB + CH3CHO : 	5.51D-15*EXP(-1878/TEMP)*0.5 	;
{46.} 	 NO3 + C3H6 = PRONO3BO2 : 	9.40D-15*0.65 	;
{47.} 	 NO3 + C3H6 = PRONO3AO2 : 	9.40D-15*0.35 	;
{48.} 	 BUT1ENE + OH = NBUTOLAO2 : 	6.55D-12*EXP(467/TEMP)*0.87 	;
{49.} 	 BUT1ENE + OH = HO3C4O2 : 	6.55D-12*EXP(467/TEMP)*0.13 	;
{50.} 	 BUT1ENE + NO3 = BU1ENO3O2 : 	3.14D-13*EXP(-938/TEMP)*0.65 	;
{51.} 	 BUT1ENE + NO3 = C43NO34O2 : 	3.14D-13*EXP(-938/TEMP)*0.35 	;
{52.} 	 BUT1ENE + O3 = CH2OOB + C2H5CHO : 	3.36D-15*EXP(-1744/TEMP)*0.5 	;
{53.} 	 BUT1ENE + O3 = C2H5CHOOA + HCHO : 	3.36D-15*EXP(-1744/TEMP)*0.5 	;
{54.} 	 C2H2 + OH = GLYOX + OH : 	KMT17*0.636 	;
{55.} 	 C2H2 + OH = HCOOH + CO + HO2 : 	KMT17*0.364 	;
{56.} 	 BENZENE + OH = BZBIPERO2 : 	2.33D-12*EXP(-193/TEMP)*0.352 	;
{57.} 	 BENZENE + OH = BZEPOXMUC + HO2 : 	2.33D-12*EXP(-193/TEMP)*0.118 	;
{58.} 	 BENZENE + OH = PHENOL + HO2 : 	2.33D-12*EXP(-193/TEMP)*0.53 	;
{59.} 	 TOLUENE + OH = C6H5CH2O2 : 	1.81D-12*EXP(338/TEMP)*0.07 	;
{60.} 	 TOLUENE + OH = TLBIPERO2 : 	1.81D-12*EXP(338/TEMP)*0.65 	;
{61.} 	 TOLUENE + OH = TLEPOXMUC + HO2 : 	1.81D-12*EXP(338/TEMP)*0.10 	;
{62.} 	 TOLUENE + OH = CRESOL + HO2 : 	1.81D-12*EXP(338/TEMP)*0.18 	;
{63.} 	 OH + C5H8 = ISOPAO2 : 	2.54D-11*EXP(410/TEMP)*0.164 	;
{64.} 	 OH + C5H8 = ISOPBO2 : 	2.54D-11*EXP(410/TEMP)*0.491 	;
{65.} 	 OH + C5H8 = ISOPCO2 : 	2.54D-11*EXP(410/TEMP)*0.086 	;
{66.} 	 OH + C5H8 = ISOPDO2 : 	2.54D-11*EXP(410/TEMP)*0.259 	;
{67.} 	 NO3 + C5H8 = NISOPO2 : 	3.03D-12*EXP(-446/TEMP) 	;
{68.} 	 O3 + C5H8 = CH2OOE + MVK : 	7.86D-15*EXP(-1913/TEMP)*0.2 	;
{69.} 	 O3 + C5H8 = HCHO + MVKOOA : 	7.86D-15*EXP(-1913/TEMP)*0.2 	;
{70.} 	 O3 + C5H8 = CH2OOE + MACR : 	7.86D-15*EXP(-1913/TEMP)*0.3 	;
{71.} 	 O3 + C5H8 = HCHO + MACROOA : 	7.86D-15*EXP(-1913/TEMP)*0.3 	;
{72.} 	 CH3COCH3 + OH = CH3COCH2O2 : 	5.34D-18*TEMP**2*EXP(-230/TEMP) 	;
{73.} 	 CH3COCH3 = CH3CO3 + CH3O2 : 	J(21) 	;
{74.} 	 DMS + OH = HODMSO2 : 	KMT18 	;
{75.} 	 DMS + OH = CH3SCH2O2 : 	1.10D-11*EXP(-240/TEMP) 	;
{76.} 	 DMS + NO3 = CH3SCH2O2 + HNO3 : 	1.90D-13*EXP(520/TEMP) 	;
{77.} 	 HCHO = H2 + CO : 	J(12) 	;
{78.} 	 OH + HCHO = HO2 + CO : 	5.50D-12*EXP(125/TEMP) 	;
{79.} 	 NO3 + HCHO = HNO3 + CO + HO2 : 	5.80D-16 	;
{80.} 	 HCHO = CO + HO2 + HO2 : 	J(11) 	;
{81.} 	 CH3CO3 = CH3CO2H : 	1.00D-11*0.3*RO2 	;
{82.} 	 CH3CO3 = CH3O2 : 	1.00D-11*0.7*RO2 	;
{83.} 	 CH3CO3 + HO2 = CH3CO2H + O3 : 	5.20D-13*EXP(980/TEMP)*0.29 	;
{84.} 	 CH3CO3 + HO2 = CH3CO3H : 	5.20D-13*EXP(980/TEMP)*0.71 	;
{85.} 	 CH3CO3 + NO2 = PAN : 	KFPAN 	;
{86.} 	 CH3CO3 + NO = NO2 + CH3O2 : 	KAPNO 	;
{87.} 	 CH3CO3 + NO3 = NO2 + CH3O2 : 	KRO2NO3*1.60 	;
{88.} 	 CH3O2 = CH3OH : 	1.82D-13*EXP(416/TEMP)*0.335*RO2 	;
{89.} 	 CH3O2 = HCHO : 	1.82D-13*EXP(416/TEMP)*0.335*RO2 	;
{90.} 	 CH3O2 + NO = CH3NO3 : 	3.00D-12*EXP(280/TEMP)*0.001 	;
{91.} 	 CH3O2 = CH3O : 	1.82D-13*EXP(416/TEMP)*0.33*RO2 	;
{92.} 	 CH3O2 + NO = CH3O + NO2 : 	3.00D-12*EXP(280/TEMP)*0.999 	;
{93.} 	 CH3O2 + HO2 = CH3OOH : 	4.10D-13*EXP(750/TEMP) 	;
{94.} 	 CH3O2 + NO2 = CH3O2NO2 : 	KMT13 	;
{95.} 	 CH3O2 + NO3 = CH3O + NO2 : 	KRO2NO3*0.40 	;
{96.} 	 C2H5O2 = C2H5OH : 	3.10D-13*0.2*RO2 	;
{97.} 	 C2H5O2 + NO = C2H5NO3 : 	2.60D-12*EXP(365/TEMP)*0.009 	;
{98.} 	 C2H5O2 = C2H5O : 	3.10D-13*0.6*RO2 	;
{99.} 	 C2H5O2 = CH3CHO : 	3.10D-13*0.2*RO2 	;
{100.} 	 C2H5O2 + NO = C2H5O + NO2 : 	2.60D-12*EXP(365/TEMP)*0.991 	;
{101.} 	 C2H5O2 + HO2 = C2H5OOH : 	2.70D-13*EXP(1000/TEMP) 	;
{102.} 	 C2H5O2 + NO3 = C2H5O + NO2 : 	KRO2NO3 	;
{103.} 	 NC3H7O2 = NPROPOL : 	6.00D-13*0.2*RO2 	;
{104.} 	 NC3H7O2 = C2H5CHO : 	6.00D-13*0.2*RO2 	;
{105.} 	 NC3H7O2 = NC3H7O : 	6.00D-13*0.6*RO2 	;
{106.} 	 NC3H7O2 + NO = NC3H7NO3 : 	2.80D-12*EXP(360/TEMP)*0.020 	;
{107.} 	 NC3H7O2 + NO = NC3H7O + NO2 : 	2.80D-12*EXP(360/TEMP)*0.980 	;
{108.} 	 NC3H7O2 + HO2 = NC3H7OOH : 	KRO2HO2*0.520 	;
{109.} 	 NC3H7O2 + NO3 = NC3H7O + NO2 : 	KRO2NO3 	;
{110.} 	 IC3H7O2 = IPROPOL : 	4.00D-14*0.2*RO2 	;
{111.} 	 IC3H7O2 = CH3COCH3 : 	4.00D-14*0.2*RO2 	;
{112.} 	 IC3H7O2 = IC3H7O : 	4.00D-14*0.6*RO2 	;
{113.} 	 IC3H7O2 + NO = IC3H7NO3 : 	2.70D-12*EXP(360/TEMP)*0.042 	;
{114.} 	 IC3H7O2 + NO = IC3H7O + NO2 : 	2.70D-12*EXP(360/TEMP)*0.958 	;
{115.} 	 IC3H7O2 + HO2 = IC3H7OOH : 	KRO2HO2*0.520 	;
{116.} 	 IC3H7O2 + NO3 = IC3H7O + NO2 : 	KRO2NO3 	;
{117.} 	 NC4H9O2 = NBUTOL : 	1.30D-12*0.2*RO2 	;
{118.} 	 NC4H9O2 = C3H7CHO : 	1.30D-12*0.2*RO2 	;
{119.} 	 NC4H9O2 = NC4H9O : 	1.30D-12*0.6*RO2 	;
{120.} 	 NC4H9O2 + NO = NC4H9NO3 : 	KRO2NO*0.033 	;
{121.} 	 NC4H9O2 + HO2 = NC4H9OOH : 	KRO2HO2*0.625 	;
{122.} 	 NC4H9O2 + NO = NC4H9O + NO2 : 	KRO2NO*0.967 	;
{123.} 	 NC4H9O2 + NO3 = NC4H9O + NO2 : 	KRO2NO3 	;
{124.} 	 SC4H9O2 = BUT2OL : 	2.50D-13*0.2*RO2 	;
{125.} 	 SC4H9O2 = MEK : 	2.50D-13*0.2*RO2 	;
{126.} 	 SC4H9O2 = SC4H9O : 	2.50D-13*0.6*RO2 	;
{127.} 	 SC4H9O2 + NO = SC4H9NO3 : 	KRO2NO*0.090 	;
{128.} 	 SC4H9O2 + NO = SC4H9O + NO2 : 	KRO2NO*0.910 	;
{129.} 	 SC4H9O2 + HO2 = SC4H9OOH : 	KRO2HO2*0.625 	;
{130.} 	 SC4H9O2 + NO3 = SC4H9O + NO2 : 	KRO2NO3 	;
{131.} 	 IC4H9O2 = IBUTOL : 	1.30D-12*0.2*RO2 	;
{132.} 	 IC4H9O2 = IPRCHO : 	1.30D-12*0.2*RO2 	;
{133.} 	 IC4H9O2 = IC4H9O : 	1.30D-12*0.6*RO2 	;
{134.} 	 IC4H9O2 + NO = IC4H9NO3 : 	KRO2NO*0.033 	;
{135.} 	 IC4H9O2 + HO2 = IC4H9OOH : 	KRO2HO2*0.625 	;
{136.} 	 IC4H9O2 + NO = IC4H9O + NO2 : 	KRO2NO*0.967 	;
{137.} 	 IC4H9O2 + NO3 = IC4H9O + NO2 : 	KRO2NO3 	;
{138.} 	 TC4H9O2 = TBUTOL : 	6.70D-15*0.3*RO2 	;
{139.} 	 TC4H9O2 = TC4H9O : 	6.70D-15*0.7*RO2 	;
{140.} 	 TC4H9O2 + NO = TC4H9NO3 : 	KRO2NO*0.025 	;
{141.} 	 TC4H9O2 + HO2 = TC4H9OOH : 	KRO2HO2*0.625 	;
{142.} 	 TC4H9O2 + NO = TC4H9O + NO2 : 	KRO2NO*0.975 	;
{143.} 	 TC4H9O2 + NO3 = TC4H9O + NO2 : 	KRO2NO3 	;
{144.} 	 PEAO2 = PEAOH : 	1.30D-12*0.2*RO2 	;
{145.} 	 PEAO2 = C4H9CHO : 	1.30D-12*0.2*RO2 	;
{146.} 	 PEAO2 = PEAO : 	1.30D-12*0.6*RO2 	;
{147.} 	 PEAO2 + NO = PEANO3 : 	KRO2NO*0.052 	;
{148.} 	 PEAO2 + HO2 = PEAOOH : 	KRO2HO2*0.706 	;
{149.} 	 PEAO2 + NO = PEAO + NO2 : 	KRO2NO*0.948 	;
{150.} 	 PEAO2 + NO3 = PEAO + NO2 : 	KRO2NO3 	;
{151.} 	 PEBO2 = PEBOH : 	2.50D-13*0.2*RO2 	;
{152.} 	 PEBO2 = MPRK : 	2.50D-13*0.2*RO2 	;
{153.} 	 PEBO2 = PEBO : 	2.50D-13*0.6*RO2 	;
{154.} 	 PEBO2 + NO = PEBNO3 : 	KRO2NO*0.129 	;
{155.} 	 PEBO2 + HO2 = PEBOOH : 	KRO2HO2*0.706 	;
{156.} 	 PEBO2 + NO = PEBO + NO2 : 	KRO2NO*0.871 	;
{157.} 	 PEBO2 + NO3 = PEBO + NO2 : 	KRO2NO3 	;
{158.} 	 PECO2 + NO = PECNO3 : 	KRO2NO*0.131 	;
{159.} 	 PECO2 = PECO : 	2.50D-13*0.6*RO2 	;
{160.} 	 PECO2 = DIEK : 	2.50D-13*0.2*RO2 	;
{161.} 	 PECO2 = PECOH : 	2.50D-13*0.2*RO2 	;
{162.} 	 PECO2 + NO = PECO + NO2 : 	KRO2NO*0.869 	;
{163.} 	 PECO2 + HO2 = PECOOH : 	KRO2HO2*0.706 	;
{164.} 	 PECO2 + NO3 = PECO + NO2 : 	KRO2NO3 	;
{165.} 	 IPEAO2 = IPEAOH : 	1.30D-12*0.2*RO2 	;
{166.} 	 IPEAO2 = BUT2CHO : 	1.30D-12*0.2*RO2 	;
{167.} 	 IPEAO2 = IPEAO : 	1.30D-12*0.6*RO2 	;
{168.} 	 IPEAO2 + NO = IPEANO3 : 	KRO2NO*0.052 	;
{169.} 	 IPEAO2 + HO2 = IPEAOOH : 	KRO2HO2*0.706 	;
{170.} 	 IPEAO2 + NO = IPEAO + NO2 : 	KRO2NO*0.948 	;
{171.} 	 IPEAO2 + NO3 = IPEAO + NO2 : 	KRO2NO3 	;
{172.} 	 IPEBO2 = IPEBOH : 	2.50D-13*0.2*RO2 	;
{173.} 	 IPEBO2 = MIPK : 	2.50D-13*0.2*RO2 	;
{174.} 	 IPEBO2 = IPEBO : 	2.50D-13*0.6*RO2 	;
{175.} 	 IPEBO2 + NO = IPEBNO3 : 	KRO2NO*0.141 	;
{176.} 	 IPEBO2 + HO2 = IPEBOOH : 	KRO2HO2*0.706 	;
{177.} 	 IPEBO2 + NO = IPEBO + NO2 : 	KRO2NO*0.859 	;
{178.} 	 IPEBO2 + NO3 = IPEBO + NO2 : 	KRO2NO3 	;
{179.} 	 IPECO2 = IPECOH : 	6.70D-15*0.3*RO2 	;
{180.} 	 IPECO2 = IPECO : 	6.70D-15*0.7*RO2 	;
{181.} 	 IPECO2 + NO = IPECNO3 : 	KRO2NO*0.047 	;
{182.} 	 IPECO2 + HO2 = IPECOOH : 	KRO2HO2*0.706 	;
{183.} 	 IPECO2 + NO = IPECO + NO2 : 	KRO2NO*0.953 	;
{184.} 	 IPECO2 + NO3 = IPECO + NO2 : 	KRO2NO3 	;
{185.} 	 HEXAO2 = HEXAOH : 	1.30D-12*0.2*RO2 	;
{186.} 	 HEXAO2 = C5H11CHO : 	1.30D-12*0.2*RO2 	;
{187.} 	 HEXAO2 = HEXAO : 	1.30D-12*0.6*RO2 	;
{188.} 	 HEXAO2 + NO = HEXANO3 : 	KRO2NO*0.078 	;
{189.} 	 HEXAO2 + NO = HEXAO + NO2 : 	KRO2NO*0.922 	;
{190.} 	 HEXAO2 + HO2 = HEXAOOH : 	KRO2HO2*0.770 	;
{191.} 	 HEXAO2 + NO3 = HEXAO + NO2 : 	KRO2NO3 	;
{192.} 	 HEXBO2 = HEXBOH : 	2.50D-13*0.2*RO2 	;
{193.} 	 HEXBO2 = HEX2ONE : 	2.50D-13*0.2*RO2 	;
{194.} 	 HEXBO2 = HEXBO : 	2.50D-13*0.6*RO2 	;
{195.} 	 HEXBO2 + NO = HEXBNO3 : 	KRO2NO*0.209 	;
{196.} 	 HEXBO2 + NO = HEXBO + NO2 : 	KRO2NO*0.791 	;
{197.} 	 HEXBO2 + HO2 = HEXBOOH : 	KRO2HO2*0.770 	;
{198.} 	 HEXBO2 + NO3 = HEXBO + NO2 : 	KRO2NO3 	;
{199.} 	 HEXCO2 + NO = HEXCNO3 : 	KRO2NO*0.230 	;
{200.} 	 HEXCO2 = HEXCO : 	2.50D-13*0.6*RO2 	;
{201.} 	 HEXCO2 = HEX3ONE : 	2.50D-13*0.2*RO2 	;
{202.} 	 HEXCO2 = HEXCOH : 	2.50D-13*0.2*RO2 	;
{203.} 	 HEXCO2 + NO = HEXCO + NO2 : 	KRO2NO*0.770 	;
{204.} 	 HEXCO2 + HO2 = HEXCOOH : 	KRO2HO2*0.770 	;
{205.} 	 HEXCO2 + NO3 = HEXCO + NO2 : 	KRO2NO3 	;
{206.} 	 HOCH2CH2O2 + NO = ETHOHNO3 : 	KRO2NO*0.005 	;
{207.} 	 HOCH2CH2O2 = HOCH2CH2O : 	2.00D-12*0.6*RO2 	;
{208.} 	 HOCH2CH2O2 = ETHGLY : 	2.00D-12*0.2*RO2 	;
{209.} 	 HOCH2CH2O2 = HOCH2CHO : 	2.00D-12*0.2*RO2 	;
{210.} 	 HOCH2CH2O2 + HO2 = HYETHO2H : 	2.00D-13*EXP(1250/TEMP) 	;
{211.} 	 HOCH2CH2O2 + NO = HOCH2CH2O + NO2 : 	KRO2NO*0.995 	;
{212.} 	 HOCH2CH2O2 + NO3 = HOCH2CH2O + NO2 : 	KRO2NO3 	;
{213.} 	 ETHENO3O2 = ETHENO3O : 	6.00D-13*0.6*RO2 	;
{214.} 	 ETHENO3O2 = ETHOHNO3 : 	6.00D-13*0.2*RO2 	;
{215.} 	 ETHENO3O2 = NO3CH2CHO : 	6.00D-13*0.2*RO2 	;
{216.} 	 ETHENO3O2 + NO = ETHENO3O + NO2 : 	KRO2NO 	;
{217.} 	 ETHENO3O2 + HO2 = ETHO2HNO3 : 	KRO2HO2*0.387 	;
{218.} 	 ETHENO3O2 + NO3 = ETHENO3O + NO2 : 	KRO2NO3 	;
{219.} 	 CH2OOA = CO : 	KDEC*0.50 	;
{220.} 	 CH2OOA = CH2OO : 	KDEC*0.37 	;
{221.} 	 CH2OOA = HO2 + CO + OH : 	KDEC*0.13 	;
{222.} 	 HYPROPO2 = ACETOL : 	8.80D-13*0.2*RO2 	;
{223.} 	 HYPROPO2 = PROPGLY : 	8.80D-13*0.2*RO2 	;
{224.} 	 HYPROPO2 = HYPROPO : 	8.80D-13*0.6*RO2 	;
{225.} 	 NO + HYPROPO2 = PROPOLNO3 : 	KRO2NO*0.023 	;
{226.} 	 HYPROPO2 + HO2 = HYPROPO2H : 	KRO2HO2*0.520 	;
{227.} 	 NO + HYPROPO2 = HYPROPO + NO2 : 	KRO2NO*0.977 	;
{228.} 	 HYPROPO2 + NO3 = HYPROPO + NO2 : 	KRO2NO3 	;
{229.} 	 IPROPOLO2 + NO = PROLNO3 : 	KRO2NO*0.009 	;
{230.} 	 IPROPOLO2 = IPROPOLO : 	2.00D-12*0.6*RO2 	;
{231.} 	 IPROPOLO2 = CH3CHOHCHO : 	2.00D-12*0.2*RO2 	;
{232.} 	 IPROPOLO2 = PROPGLY : 	2.00D-12*0.2*RO2 	;
{233.} 	 IPROPOLO2 + HO2 = IPROPOLO2H : 	KRO2HO2*0.520 	;
{234.} 	 IPROPOLO2 + NO = IPROPOLO + NO2 : 	KRO2NO*0.991 	;
{235.} 	 IPROPOLO2 + NO3 = IPROPOLO + NO2 : 	KRO2NO3 	;
{236.} 	 CH3CHOOA = CH3CHOO : 	KDEC*0.24 	;
{237.} 	 CH3CHOOA = CH3O2 + CO + OH : 	KDEC*0.36 	;
{238.} 	 CH3CHOOA = CH4 : 	KDEC*0.20 	;
{239.} 	 CH3CHOOA = CH3O2 + HO2 : 	KDEC*0.20 	;
{240.} 	 CH2OOB = CO : 	KDEC*0.40 	;
{241.} 	 CH2OOB = CH2OO : 	KDEC*0.24 	;
{242.} 	 CH2OOB = HO2 + CO + OH : 	KDEC*0.36 	;
{243.} 	 PRONO3BO2 = PRONO3BO : 	4.00D-14*0.6*RO2 	;
{244.} 	 PRONO3BO2 = PROLNO3 : 	4.00D-14*0.2*RO2 	;
{245.} 	 PRONO3BO2 = NOA : 	4.00D-14*0.2*RO2 	;
{246.} 	 PRONO3BO2 + NO = PRONO3BO + NO2 : 	KRO2NO 	;
{247.} 	 PRONO3BO2 + HO2 = PR2O2HNO3 : 	KRO2HO2*0.520 	;
{248.} 	 PRONO3BO2 + NO3 = PRONO3BO + NO2 : 	KRO2NO3 	;
{249.} 	 PRONO3AO2 = PRONO3AO : 	6.00D-13*0.6*RO2 	;
{250.} 	 PRONO3AO2 = PROPOLNO3 : 	6.00D-13*0.2*RO2 	;
{251.} 	 PRONO3AO2 = CHOPRNO3 : 	6.00D-13*0.2*RO2 	;
{252.} 	 PRONO3AO2 + NO = PRONO3AO + NO2 : 	KRO2NO 	;
{253.} 	 PRONO3AO2 + HO2 = PR1O2HNO3 : 	KRO2HO2*0.520 	;
{254.} 	 PRONO3AO2 + NO3 = PRONO3AO + NO2 : 	KRO2NO3 	;
{255.} 	 NBUTOLAO2 = NBUTOLAOH : 	8.80D-13*0.2*RO2 	;
{256.} 	 NBUTOLAO2 = MEKCOH : 	8.80D-13*0.2*RO2 	;
{257.} 	 NBUTOLAO2 = NBUTOLAO : 	8.80D-13*0.6*RO2 	;
{258.} 	 NBUTOLAO2 + NO = NBUTOLANO3 : 	KRO2NO*0.042 	;
{259.} 	 NBUTOLAO2 + NO = NBUTOLAO + NO2 : 	KRO2NO*0.958 	;
{260.} 	 NBUTOLAO2 + HO2 = NBUTOLAOOH : 	KRO2HO2*0.625 	;
{261.} 	 NBUTOLAO2 + NO3 = NBUTOLAO + NO2 : 	KRO2NO3 	;
{262.} 	 HO3C4O2 = HO3C4O : 	2.00D-12*0.6*RO2 	;
{263.} 	 HO3C4O2 = HO3C3CHO : 	2.00D-12*0.2*RO2 	;
{264.} 	 HO3C4O2 + NO = HO3C4NO3 : 	KRO2NO*0.017 	;
{265.} 	 HO3C4O2 = NBUTOLAOH : 	2.00D-12*0.2*RO2 	;
{266.} 	 HO3C4O2 + HO2 = HO3C4OOH : 	KRO2HO2*0.625 	;
{267.} 	 HO3C4O2 + NO = HO3C4O + NO2 : 	KRO2NO*0.983 	;
{268.} 	 HO3C4O2 + NO3 = HO3C4O + NO2 : 	KRO2NO3 	;
{269.} 	 BU1ENO3O2 = BU1ENO3O : 	2.50D-13*0.6*RO2 	;
{270.} 	 BU1ENO3O2 = HO3C4NO3 : 	2.50D-13*0.2*RO2 	;
{271.} 	 BU1ENO3O2 = CO3C4NO3 : 	2.50D-13*0.2*RO2 	;
{272.} 	 BU1ENO3O2 + NO = BU1ENO3O + NO2 : 	KRO2NO 	;
{273.} 	 BU1ENO3O2 + HO2 = BU1ENO3OOH : 	KRO2HO2*0.625 	;
{274.} 	 BU1ENO3O2 + NO3 = BU1ENO3O + NO2 : 	KRO2NO3 	;
{275.} 	 C43NO34O2 = C43NO34O : 	2.00D-12*0.6*RO2 	;
{276.} 	 C43NO34O2 = BUTAL2NO3 : 	2.00D-12*0.2*RO2 	;
{277.} 	 C43NO34O2 = NBUTOLANO3 : 	2.00D-12*0.2*RO2 	;
{278.} 	 C43NO34O2 + NO = C43NO34O + NO2 : 	KRO2NO 	;
{279.} 	 C43NO34O2 + HO2 = C43NO34OOH : 	KRO2HO2*0.625 	;
{280.} 	 C43NO34O2 + NO3 = C43NO34O + NO2 : 	KRO2NO3 	;
{281.} 	 C2H5CHO + OH = C2H5CO3 : 	1.96D-11 	;
{282.} 	 C2H5CHO = C2H5O2 + HO2 + CO : 	J(14) 	;
{283.} 	 C2H5CHO + NO3 = C2H5CO3 + HNO3 : 	KNO3AL*2.4 	;
{284.} 	 C2H5CHOOA = C2H5CHOO : 	KDEC*0.24 	;
{285.} 	 C2H5CHOOA = C2H5O2 + CO + OH : 	KDEC*0.36 	;
{286.} 	 C2H5CHOOA = C2H6 : 	KDEC*0.20 	;
{287.} 	 C2H5CHOOA = C2H5O2 + HO2 : 	KDEC*0.20 	;
{288.} 	 GLYOX = CO + CO + H2 : 	J(31) 	;
{289.} 	 GLYOX = HCHO + CO : 	J(32) 	;
{290.} 	 OH + GLYOX = HCOCO3 : 	1.14D-11*0.4 	;
{291.} 	 OH + GLYOX = CO + CO + HO2 : 	1.14D-11*0.6 	;
{292.} 	 NO3 + GLYOX = CO + CO + HO2 + HNO3 : 	KNO3AL*0.6 	;
{293.} 	 NO3 + GLYOX = HCOCO3 + HNO3 : 	KNO3AL*0.4 	;
{294.} 	 GLYOX = CO + CO + HO2 + HO2 : 	J(33) 	;
{295.} 	 HCOOH + OH = HO2 : 	4.50D-13 	;
{296.} 	 BZBIPERO2 + NO = BZBIPERNO3 : 	KRO2NO*0.082 	;
{297.} 	 BZBIPERO2 = BZBIPERO : 	8.80D-13*RO2*0.6 	;
{298.} 	 BZBIPERO2 = BZBIPER2OH : 	8.80D-13*RO2*0.2 	;
{299.} 	 BZBIPERO2 = BZOBIPEROH : 	8.80D-13*RO2*0.2 	;
{300.} 	 BZBIPERO2 + NO = NO2 + BZBIPERO : 	KRO2NO*0.918 	;
{301.} 	 BZBIPERO2 + HO2 = BZBIPEROOH : 	KRO2HO2*0.770 	;
{302.} 	 BZBIPERO2 + NO3 = NO2 + BZBIPERO : 	KRO2NO3 	;
{303.} 	 BZEPOXMUC + OH = BZEMUCO2 : 	6.08D-11*0.69 	;
{304.} 	 BZEPOXMUC + OH = BZEMUCCO3 : 	6.08D-11*0.31 	;
{305.} 	 BZEPOXMUC + O3 = EPXC4DIAL + GLYOOA : 	2.00D-18 	;
{306.} 	 BZEPOXMUC = C5DIALO2 + HO2 + CO : 	J(4)*0.1*0.5 	;
{307.} 	 BZEPOXMUC + NO3 = BZEMUCCO3 + HNO3 : 	2*KNO3AL*2.75 	;
{308.} 	 BZEPOXMUC = MALDIAL + HO2 + CO + HO2 + CO : 	J(4)*0.1*0.5 	;
{309.} 	 PHENOL + OH = C6H5O : 	2.63D-11*0.06 	;
{310.} 	 PHENOL + OH = PHENO2 : 	2.63D-11*0.14 	;
{311.} 	 PHENOL + OH = CATECHOL + HO2 : 	2.63D-11*0.8 	;
{312.} 	 PHENOL + NO3 = NPHENO2 : 	3.78D-12*0.258 	;
{313.} 	 PHENOL + NO3 = C6H5O + HNO3 : 	3.78D-12*0.742 	;
{314.} 	 C6H5CH2O2 = C6H5CH2OH : 	1.30D-12*0.20*RO2 	;
{315.} 	 C6H5CH2O2 = BENZAL : 	1.30D-12*0.20*RO2 	;
{316.} 	 C6H5CH2O2 = C6H5CH2O : 	1.30D-12*0.60*RO2 	;
{317.} 	 C6H5CH2O2 + NO = C6H5CH2NO3 : 	KRO2NO*0.105 	;
{318.} 	 C6H5CH2O2 + HO2 = C6H5CH2OOH : 	KRO2HO2*0.820 	;
{319.} 	 C6H5CH2O2 + NO = C6H5CH2O + NO2 : 	KRO2NO*0.895 	;
{320.} 	 C6H5CH2O2 + NO3 = C6H5CH2O + NO2 : 	KRO2NO3 	;
{321.} 	 TLBIPERO2 + NO = TLBIPERNO3 : 	KRO2NO*0.111 	;
{322.} 	 TLBIPERO2 = TLBIPERO : 	8.80D-13*RO2*0.60 	;
{323.} 	 TLBIPERO2 = TLBIPER2OH : 	8.80D-13*RO2*0.20 	;
{324.} 	 TLBIPERO2 = TLOBIPEROH : 	8.80D-13*RO2*0.20 	;
{325.} 	 TLBIPERO2 + NO = NO2 + TLBIPERO : 	KRO2NO*0.889 	;
{326.} 	 TLBIPERO2 + HO2 = TLBIPEROOH : 	KRO2HO2*0.820 	;
{327.} 	 TLBIPERO2 + NO3 = NO2 + TLBIPERO : 	KRO2NO3 	;
{328.} 	 TLEPOXMUC + OH = TLEMUCO2 : 	7.99D-11*0.69 	;
{329.} 	 TLEPOXMUC + OH = TLEMUCCO3 : 	7.99D-11*0.31 	;
{330.} 	 TLEPOXMUC = C615CO2O2 + HO2 + CO : 	J(4)*0.1*0.5 	;
{331.} 	 TLEPOXMUC + O3 = EPXC4DIAL + MGLOOB : 	5.00D-18 	;
{332.} 	 TLEPOXMUC = EPXC4DIAL + CH3CO3 + HO2 + CO : 	J(4)*0.1*0.5 	;
{333.} 	 TLEPOXMUC + NO3 = TLEMUCCO3 + HNO3 : 	KNO3AL*2.75 	;
{334.} 	 CRESOL + OH = TOL1O : 	4.65D-11*0.073 	;
{335.} 	 CRESOL + OH = CRESO2 : 	4.65D-11*0.200 	;
{336.} 	 CRESOL + OH = MCATECHOL + HO2 : 	4.65D-11*0.727 	;
{337.} 	 CRESOL + NO3 = NCRESO2 : 	1.25D-11*0.506 	;
{338.} 	 CRESOL + NO3 = TOL1O + HNO3 : 	1.25D-11*0.391 	;
{339.} 	 CRESOL + NO3 = CRESO2 + HNO3 : 	1.25D-11*0.103 	;
{340.} 	 ISOPAO2 + NO = ISOPANO3 : 	KRO2NO*0.108 	;
{341.} 	 ISOPAO2 = ISOPAO : 	2.40D-12*0.8*RO2 	;
{342.} 	 ISOPAO2 = HC4ACHO : 	2.40D-12*0.1*RO2 	;
{343.} 	 ISOPAO2 = ISOPAOH : 	2.40D-12*0.1*RO2 	;
{344.} 	 ISOPAO2 + NO = ISOPAO + NO2 : 	KRO2NO*0.892 	;
{345.} 	 ISOPAO2 + HO2 = ISOPAOOH : 	KRO2HO2*0.706 	;
{346.} 	 ISOPAO2 + NO3 = ISOPAO + NO2 : 	KRO2NO3 	;
{347.} 	 ISOPBO2 + NO = ISOPBNO3 : 	KRO2NO*0.072 	;
{348.} 	 ISOPBO2 = ISOPBO : 	8.00D-13*0.8*RO2 	;
{349.} 	 ISOPBO2 = ISOPBOH : 	8.00D-13*0.2*RO2 	;
{350.} 	 ISOPBO2 + NO = ISOPBO + NO2 : 	KRO2NO*0.928 	;
{351.} 	 ISOPBO2 + HO2 = ISOPBOOH : 	KRO2HO2*0.706 	;
{352.} 	 ISOPBO2 + NO3 = ISOPBO + NO2 : 	KRO2NO3 	;
{353.} 	 ISOPCO2 + NO = ISOPCNO3 : 	KRO2NO*0.108 	;
{354.} 	 ISOPCO2 = ISOPCO : 	2.00D-12*0.8*RO2 	;
{355.} 	 ISOPCO2 = HC4CCHO : 	2.00D-12*0.1*RO2 	;
{356.} 	 ISOPCO2 = ISOPAOH : 	2.00D-12*0.1*RO2 	;
{357.} 	 ISOPCO2 + NO = ISOPCO + NO2 : 	KRO2NO*0.892 	;
{358.} 	 ISOPCO2 + HO2 = ISOPCOOH : 	KRO2HO2*0.706 	;
{359.} 	 ISOPCO2 + NO3 = ISOPCO + NO2 : 	KRO2NO3 	;
{360.} 	 ISOPDO2 = HCOC5 : 	2.90D-12*0.1*RO2 	;
{361.} 	 ISOPDO2 = ISOPDOH : 	2.90D-12*0.1*RO2 	;
{362.} 	 ISOPDO2 = ISOPDO : 	2.90D-12*0.8*RO2 	;
{363.} 	 ISOPDO2 + NO = ISOPDNO3 : 	KRO2NO*0.145 	;
{364.} 	 ISOPDO2 + HO2 = ISOPDOOH : 	KRO2HO2*0.706 	;
{365.} 	 ISOPDO2 + NO = ISOPDO + NO2 : 	KRO2NO*0.855 	;
{366.} 	 ISOPDO2 + NO3 = ISOPDO + NO2 : 	KRO2NO3 	;
{367.} 	 NISOPO2 + NO = NISOPNO3 : 	KRO2NO*0.052 	;
{368.} 	 NISOPO2 = NISOPO : 	1.30D-12*0.6*RO2 	;
{369.} 	 NISOPO2 = NC4CHO : 	1.30D-12*0.2*RO2 	;
{370.} 	 NISOPO2 = ISOPCNO3 : 	1.30D-12*0.2*RO2 	;
{371.} 	 NISOPO2 + NO = NISOPO + NO2 : 	KRO2NO*0.948 	;
{372.} 	 NISOPO2 + HO2 = NISOPOOH : 	KRO2HO2*0.706 	;
{373.} 	 NISOPO2 + NO3 = NISOPO + NO2 : 	KRO2NO3 	;
{374.} 	 CH2OOE = CO : 	KDEC*0.51 	;
{375.} 	 CH2OOE = CH2OO : 	KDEC*0.22 	;
{376.} 	 CH2OOE = HO2 + CO + OH : 	KDEC*0.27 	;
{377.} 	 MVK = C3H6 + CO : 	J(23) 	;
{378.} 	 OH + MVK = HMVKAO2 : 	4.13D-12*EXP(452/TEMP)*0.3 	;
{379.} 	 OH + MVK = HMVKBO2 : 	4.13D-12*EXP(452/TEMP)*0.7 	;
{380.} 	 O3 + MVK = MGLYOX + CH2OOB : 	7.51D-16*EXP(-1521/TEMP)*0.5 	;
{381.} 	 O3 + MVK = MGLOOA + HCHO : 	7.51D-16*EXP(-1521/TEMP)*0.5 	;
{382.} 	 MVK = CH3CO3 + HCHO + CO + HO2 : 	J(24) 	;
{383.} 	 MVKOOA = MVKOO : 	KDEC*0.22 	;
{384.} 	 MVKOOA = OH + MVKO2 : 	KDEC*0.27 	;
{385.} 	 MVKOOA = C3H6 : 	KDEC*0.255 	;
{386.} 	 MVKOOA = CH3O2 + HCHO + CO + HO2 : 	KDEC*0.255 	;
{387.} 	 OH + MACR = MACROHO2 : 	2.9D-11*0.08 	;
{388.} 	 OH + MACR = MACRO2 : 	2.9D-11*0.42 	;
{389.} 	 OH + MACR = MACO3 : 	2.9D-11*0.5 	;
{390.} 	 O3 + MACR = MGLYOX + CH2OOG : 	1.4D-15*EXP(-2100/TEMP)*0.88 	;
{391.} 	 O3 + MACR = CH2OOC + MGLYOX : 	1.36D-15*EXP(-2112/TEMP)*0.5 	;
{392.} 	 MACR = MACO3 + HO2 : 	J(19) 	;
{393.} 	 O3 + MACR = HCHO + MGLYOOB : 	1.4D-15*EXP(-2100/TEMP)*0.12 	;
{394.} 	 MACR = CH3CO3 + HCHO + CO + HO2 : 	J(18) 	;
{395.} 	 NO3 + MACR = MACO3 + HNO3 : 	3.4D-15 	;
{396.} 	 MACROOA = MACROO : 	KDEC*0.22 	;
{397.} 	 MACROOA = C3H6 : 	KDEC*0.255 	;
{398.} 	 MACROOA = OH + CO + CH3CO3 + HCHO : 	KDEC*0.27 	;
{399.} 	 MACROOA = CH3CO3 + HCHO + HO2 : 	KDEC*0.255 	;
{400.} 	 CH3COCH2O2 = MGLYOX : 	2.00D-12*0.2*RO2 	;
{401.} 	 CH3COCH2O2 = ACETOL : 	2.00D-12*0.2*RO2 	;
{402.} 	 CH3COCH2O2 = CH3COCH2O : 	2.00D-12*0.6*RO2 	;
{403.} 	 CH3COCH2O2 + NO = CH3COCH2O + NO2 : 	KRO2NO 	;
{404.} 	 CH3COCH2O2 + HO2 = HYPERACET : 	1.36D-13*EXP(1250/TEMP) 	;
{405.} 	 CH3COCH2O2 + NO3 = CH3COCH2O + NO2 : 	KRO2NO3 	;
{406.} 	 HODMSO2 = DMSO + HO2 : 	3.10D+00 	;
{407.} 	 HODMSO2 + NO = DMSO2 + HO2 + NO2 : 	KRO2NO 	;
{408.} 	 CH3SCH2O2 = CH3SCH2O : 	2.00D-12*RO2*0.6 	;
{409.} 	 CH3SCH2O2 = CH3SCHO : 	2.00D-12*RO2*0.2 	;
{410.} 	 CH3SCH2O2 = CH3SCH2OH : 	2.00D-12*RO2*0.2 	;
{411.} 	 CH3SCH2O2 + NO = CH3SCH2O + NO2 : 	4.90D-12*EXP(260/TEMP) 	;
{412.} 	 CH3SCH2O2 + HO2 = CH3SCH2OOH : 	KRO2HO2*0.387*0.6 	;
{413.} 	 CH3SCH2O2 + HO2 = CH3SCHO : 	KRO2HO2*0.387*0.4 	;
{414.} 	 CH3SCH2O2 + NO3 = CH3SCH2O + NO2 : 	KRO2NO3 	;
{415.} 	 CH3CO2H + OH = CH3O2 : 	8.00D-13 	;
{416.} 	 CH3CO3H = CH3O2 + OH : 	J(41) 	;
{417.} 	 CH3CO3H + OH = CH3CO3 : 	3.70D-12 	;
{418.} 	 PAN = CH3CO3 + NO2 : 	KBPAN 	;
{419.} 	 PAN + OH = HCHO + CO + NO2 : 	9.50D-13*EXP(-650/TEMP) 	;
{420.} 	 OH + CH3NO3 = HCHO + NO2 : 	1.00D-14*EXP(1060/TEMP) 	;
{421.} 	 CH3NO3 = CH3O + NO2 : 	J(51) 	;
{422.} 	 CH3O = HCHO + HO2 : 	7.20D-14*EXP(-1080/TEMP)*O2 	;
{423.} 	 OH + CH3OOH = CH3O2 : 	1.90D-12*EXP(190/TEMP) 	;
{424.} 	 OH + CH3OOH = HCHO + OH : 	1.00D-12*EXP(190/TEMP) 	;
{425.} 	 CH3OOH = CH3O + OH : 	J(41) 	;
{426.} 	 CH3O2NO2 = CH3O2 + NO2 : 	KMT14 	;
{427.} 	 C2H5OH + OH = HOCH2CH2O2 : 	6.18D-18*TEMP**2*EXP(532/TEMP)*0.113 	;
{428.} 	 C2H5OH + OH = CH3CHO + HO2 : 	6.18D-18*TEMP**2*EXP(532/TEMP)*0.887 	;
{429.} 	 OH + C2H5NO3 = CH3CHO + NO2 : 	4.40D-14*EXP(720/TEMP) 	;
{430.} 	 C2H5NO3 = C2H5O + NO2 : 	J(52) 	;
{431.} 	 C2H5O = CH3CHO + HO2 : 	6.00D-14*EXP(-550/TEMP)*O2 	;
{432.} 	 OH + C2H5OOH = C2H5O2 : 	1.90D-12*EXP(190/TEMP) 	;
{433.} 	 OH + C2H5OOH = CH3CHO + OH : 	8.01D-12 	;
{434.} 	 C2H5OOH = C2H5O + OH : 	J(41) 	;
{435.} 	 NPROPOL + OH = HYPROPO2 : 	5.53D-12*0.443 	;
{436.} 	 NPROPOL + OH = HO1C3O2 : 	5.53D-12*0.063 	;
{437.} 	 NPROPOL + OH = C2H5CHO + HO2 : 	5.53D-12*0.494 	;
{438.} 	 NC3H7O = C2H5CHO + HO2 : 	KROPRIM*O2 	;
{439.} 	 OH + NC3H7NO3 = C2H5CHO + NO2 : 	7.30D-13 	;
{440.} 	 NC3H7NO3 = NC3H7O + NO2 : 	J(53) 	;
{441.} 	 OH + NC3H7OOH = NC3H7O2 : 	1.90D-12*EXP(190/TEMP) 	;
{442.} 	 OH + NC3H7OOH = C2H5CHO + OH : 	1.10D-11 	;
{443.} 	 NC3H7OOH = NC3H7O + OH : 	J(41) 	;
{444.} 	 IPROPOL + OH = IPROPOLO2 : 	4.06D-18*TEMP**2*EXP(788/TEMP)*0.139 	;
{445.} 	 IPROPOL + OH = CH3COCH3 + HO2 : 	4.06D-18*TEMP**2*EXP(788/TEMP)*0.861 	;
{446.} 	 IC3H7O = CH3COCH3 + HO2 : 	1.50D-14*EXP(-200/TEMP)*O2 	;
{447.} 	 OH + IC3H7NO3 = CH3COCH3 + NO2 : 	4.90D-13 	;
{448.} 	 IC3H7NO3 = IC3H7O + NO2 : 	J(54) 	;
{449.} 	 OH + IC3H7OOH = IC3H7O2 : 	1.90D-12*EXP(190/TEMP) 	;
{450.} 	 OH + IC3H7OOH = CH3COCH3 + OH : 	1.66D-11 	;
{451.} 	 IC3H7OOH = IC3H7O + OH : 	J(41) 	;
{452.} 	 NBUTOL + OH = NBUTOLAO2 : 	8.57D-12*0.321 	;
{453.} 	 NBUTOL + OH = NBUTOLBO2 : 	8.57D-12*0.321 	;
{454.} 	 NBUTOL + OH = C3H7CHO + HO2 : 	8.57D-12*0.358 	;
{455.} 	 C3H7CHO + OH = BUTALO2 : 	5.26D-12*EXP(446/TEMP)*0.151 	;
{456.} 	 C3H7CHO + OH = C3H7CO3 : 	5.26D-12*EXP(446/TEMP)*0.849 	;
{457.} 	 C3H7CHO = NC3H7O2 + CO + HO2 : 	J(15) 	;
{458.} 	 C3H7CHO = CH3CHO + C2H4 : 	J(16) 	;
{459.} 	 C3H7CHO + NO3 = HNO3 + C3H7CO3 : 	KNO3AL*4.0 	;
{460.} 	 NC4H9O = HO1C4O2 : 	3.05D+11*EXP(-4240/TEMP) 	;
{461.} 	 NC4H9O = C3H7CHO + HO2 : 	KROPRIM*O2 	;
{462.} 	 OH + NC4H9NO3 = C3H7CHO + NO2 : 	1.78D-12 	;
{463.} 	 NC4H9NO3 = NC4H9O + NO2 : 	J(53) 	;
{464.} 	 OH + NC4H9OOH = NC4H9O2 : 	1.90D-12*EXP(190/TEMP) 	;
{465.} 	 OH + NC4H9OOH = C3H7CHO + OH : 	1.24D-11 	;
{466.} 	 NC4H9OOH = NC4H9O + OH : 	J(41) 	;
{467.} 	 BUT2OL + OH = BUT2OLO2 : 	9.52D-12*0.361 	;
{468.} 	 BUT2OL + OH = MEK + HO2 : 	9.52D-12*0.639 	;
{469.} 	 MEK + OH = MEKAO2 : 	3.24D-18*TEMP**2*EXP(414/TEMP)*0.459 	;
{470.} 	 MEK + OH = MEKCO2 : 	3.24D-18*TEMP**2*EXP(414/TEMP)*0.079 	;
{471.} 	 MEK + OH = MEKBO2 : 	3.24D-18*TEMP**2*EXP(414/TEMP)*0.462 	;
{472.} 	 MEK = CH3CO3 + C2H5O2 : 	J(22) 	;
{473.} 	 SC4H9O = MEK + HO2 : 	KROSEC*O2 	;
{474.} 	 SC4H9O = CH3CHO + C2H5O2 : 	2.00D+14*EXP(-6824/TEMP) 	;
{475.} 	 OH + SC4H9NO3 = MEK + NO2 : 	9.20D-13 	;
{476.} 	 SC4H9NO3 = SC4H9O + NO2 : 	J(54) 	;
{477.} 	 OH + SC4H9OOH = SC4H9O2 : 	1.90D-12*EXP(190/TEMP) 	;
{478.} 	 OH + SC4H9OOH = MEK + OH : 	2.15D-11 	;
{479.} 	 SC4H9OOH = SC4H9O + OH : 	J(41) 	;
{480.} 	 IBUTOL + OH = IBUTOLBO2 : 	9.00D-12*0.558 	;
{481.} 	 IBUTOL + OH = IBUTOLCO2 : 	9.00D-12*0.090 	;
{482.} 	 IBUTOL + OH = IPRCHO + HO2 : 	9.00D-12*0.352 	;
{483.} 	 IPRCHO + OH = IBUTALBO2 : 	6.61D-12*EXP(411/TEMP)*0.054 	;
{484.} 	 IPRCHO + OH = IBUTALCO2 : 	6.61D-12*EXP(411/TEMP)*0.059 	;
{485.} 	 IPRCHO + OH = IPRCO3 : 	6.61D-12*EXP(411/TEMP)*0.887 	;
{486.} 	 IPRCHO = IC3H7O2 + HO2 + CO : 	J(17) 	;
{487.} 	 IPRCHO + NO3 = HNO3 + IPRCO3 : 	KNO3AL*4.0 	;
{488.} 	 IC4H9O = IPRCHO + HO2 : 	KROPRIM*O2 	;
{489.} 	 OH + IC4H9NO3 = IPRCHO + NO2 : 	7.69D-13 	;
{490.} 	 IC4H9NO3 = IC4H9O + NO2 : 	J(53) 	;
{491.} 	 OH + IC4H9OOH = IC4H9O2 : 	1.90D-12*EXP(190/TEMP) 	;
{492.} 	 OH + IC4H9OOH = IPRCHO + OH : 	1.24D-11 	;
{493.} 	 IC4H9OOH = IC4H9O + OH : 	J(41) 	;
{494.} 	 OH + TBUTOL = TBUTOLO2 : 	4.29D-18*TEMP**2*EXP(322/TEMP)*0.888 	;
{495.} 	 OH + TBUTOL = TC4H9O : 	4.29D-18*TEMP**2*EXP(322/TEMP)*0.112 	;
{496.} 	 TC4H9O = CH3COCH3 + CH3O2 : 	6.00D+14*EXP(-8153/TEMP) 	;
{497.} 	 TC4H9NO3 = TC4H9O + NO2 : 	J(55) 	;
{498.} 	 OH + TC4H9NO3 = CH3COCH3 + HCHO + NO2 : 	8.16D-14 	;
{499.} 	 OH + TC4H9OOH = TC4H9O2 : 	2.17D-12*EXP(190/TEMP) 	;
{500.} 	 TC4H9OOH = TC4H9O + OH : 	J(41) 	;
{501.} 	 OH + PEAOH = C4H9CHO + HO2 : 	8.57D-12 	;
{502.} 	 C4H9CHO + OH = C4CHOBO2 : 	6.34D-12*EXP(448/TEMP)*0.19 	;
{503.} 	 C4H9CHO + OH = C4H9CO3 : 	6.34D-12*EXP(448/TEMP)*0.81 	;
{504.} 	 C4H9CHO = NC4H9O2 + HO2 + CO : 	J(15) 	;
{505.} 	 C4H9CHO + NO3 = C4H9CO3 + HNO3 : 	KNO3AL*5.5 	;
{506.} 	 PEAO = HO1C5O2 : 	2.03D+11*EXP(-3430/TEMP) 	;
{507.} 	 OH + PEANO3 = C4H9CHO + NO2 : 	3.00D-12 	;
{508.} 	 PEANO3 = PEAO + NO2 : 	J(53) 	;
{509.} 	 OH + PEAOOH = PEAO2 : 	1.90D-12*EXP(190/TEMP) 	;
{510.} 	 OH + PEAOOH = C4H9CHO + OH : 	1.41D-11 	;
{511.} 	 PEAOOH = PEAO + OH : 	J(41) 	;
{512.} 	 OH + PEBOH = MPRK + HO2 : 	1.14D-11 	;
{513.} 	 MPRK + OH = MPRKAO2 : 	4.90D-12*0.182 	;
{514.} 	 MPRK + OH = CO2C54O2 : 	4.90D-12*0.818 	;
{515.} 	 MPRK = CH3CO3 + NC3H7O2 : 	J(22) 	;
{516.} 	 PEBO = HO2C5O2 : 	3.05D+11*EXP(-4240/TEMP) 	;
{517.} 	 PEBO = MPRK + HO2 : 	KROSEC*O2 	;
{518.} 	 OH + PEBNO3 = MPRK + NO2 : 	1.85D-12 	;
{519.} 	 PEBNO3 = PEBO + NO2 : 	J(54) 	;
{520.} 	 OH + PEBOOH = PEBO2 : 	1.90D-12*EXP(190/TEMP) 	;
{521.} 	 OH + PEBOOH = MPRK + OH : 	2.30D-11 	;
{522.} 	 PEBOOH = PEBO + OH : 	J(41) 	;
{523.} 	 OH + PECNO3 = DIEK + NO2 : 	1.12D-12 	;
{524.} 	 PECNO3 = PECO + NO2 : 	J(54) 	;
{525.} 	 PECO = C2H5O2 + C2H5CHO : 	4.00D+14*EXP(-6990/TEMP) 	;
{526.} 	 PECO = DIEK + HO2 : 	KROSEC*O2 	;
{527.} 	 DIEK + OH = DIEKAO2 : 	2.00D-12*0.501 	;
{528.} 	 DIEK + OH = DIEKBO2 : 	2.00D-12*0.499 	;
{529.} 	 DIEK = C2H5CHO + C2H5O2 : 	J(22) 	;
{530.} 	 OH + PECOH = PE2ENEBO2 : 	1.22D-11*0.493 	;
{531.} 	 OH + PECOH = HO3C5O2 : 	1.22D-11*0.070 	;
{532.} 	 OH + PECOH = DIEK + HO2 : 	1.22D-11*0.436 	;
{533.} 	 OH + PECOOH = DIEK + OH : 	2.73D-11 	;
{534.} 	 PECOOH = PECO + OH : 	J(41) 	;
{535.} 	 OH + IPEAOH = M2BUOL2O2 : 	1.12D-11*0.454 	;
{536.} 	 OH + IPEAOH = HM2C43O2 : 	1.12D-11*0.258 	;
{537.} 	 OH + IPEAOH = BUT2CHO + HO2 : 	1.12D-11*0.288 	;
{538.} 	 OH + BUT2CHO = BUT2CO3 : 	2.69D-11 	;
{539.} 	 BUT2CHO = CH3CHO + C3H6 : 	J(16) 	;
{540.} 	 BUT2CHO = SC4H9O2 + HO2 + CO : 	J(17) 	;
{541.} 	 NO3 + BUT2CHO = BUT2CO3 + HNO3 : 	KNO3AL*8.5 	;
{542.} 	 IPEAO = C52O2 : 	3.05D+11*EXP(-4240/TEMP) 	;
{543.} 	 IPEAO = BUT2CHO + HO2 : 	KROPRIM*O2 	;
{544.} 	 OH + IPEANO3 = BUT2CHO + NO2 : 	2.01D-12 	;
{545.} 	 IPEANO3 = IPEAO + NO2 : 	J(53) 	;
{546.} 	 OH + IPEAOOH = IPEAO2 : 	1.90D-12*EXP(190/TEMP) 	;
{547.} 	 OH + IPEAOOH = BUT2CHO + OH : 	1.41D-11 	;
{548.} 	 IPEAOOH = IPEAO + OH : 	J(41) 	;
{549.} 	 OH + IPEBOH = ME2BUOLO2 : 	1.24D-11*0.463 	;
{550.} 	 OH + IPEBOH = H2M3C4O2 : 	1.24D-11*0.074 	;
{551.} 	 OH + IPEBOH = MIPK + HO2 : 	1.24D-11*0.463 	;
{552.} 	 OH + MIPK = MIPKAO2 : 	2.77D-12*0.523 	;
{553.} 	 OH + MIPK = MIPKBO2 : 	2.77D-12*0.477 	;
{554.} 	 MIPK = CH3CO3 + IC3H7O2 : 	J(22) 	;
{555.} 	 IPEBO = MIPK + HO2 : 	KROSEC*O2 	;
{556.} 	 IPEBO = CH3CHO + IC3H7O2 : 	2.70D+14*EXP(-7398/TEMP) 	;
{557.} 	 OH + IPEBNO3 = MIPK + NO2 : 	1.82D-12 	;
{558.} 	 IPEBNO3 = IPEBO + NO2 : 	J(54) 	;
{559.} 	 OH + IPEBOOH = IPEBO2 : 	1.90D-12*EXP(190/TEMP) 	;
{560.} 	 OH + IPEBOOH = MIPK + OH : 	2.29D-11 	;
{561.} 	 IPEBOOH = IPEBO + OH : 	J(41) 	;
{562.} 	 OH + IPECOH = ME2BU2OLO2 : 	3.85D-12*0.701 	;
{563.} 	 OH + IPECOH = PROL11MO2 : 	3.85D-12*0.199 	;
{564.} 	 OH + IPECOH = HO2M2C4O2 : 	3.85D-12*0.100 	;
{565.} 	 IPECO = CH3COCH3 + C2H5O2 : 	2.00D+14*EXP(-6995/TEMP) 	;
{566.} 	 IPECNO3 = IPECO + NO2 : 	J(55) 	;
{567.} 	 OH + IPECNO3 = CH3COCH3 + CH3CHO + NO2 : 	4.08D-13 	;
{568.} 	 OH + IPECOOH = IPECO2 : 	5.25D-12 	;
{569.} 	 IPECOOH = IPECO + OH : 	J(41) 	;
{570.} 	 OH + HEXAOH = C5H11CHO + HO2 : 	9.72D-12 	;
{571.} 	 OH + C5H11CHO = C5H11CO3 : 	2.88D-11 	;
{572.} 	 C5H11CHO = CH3CHO + BUT1ENE : 	J(16) 	;
{573.} 	 C5H11CHO = PEAO2 + HO2 + CO : 	J(15) 	;
{574.} 	 NO3 + C5H11CHO = C5H11CO3 + HNO3 : 	KNO3AL*5.5 	;
{575.} 	 HEXAO = HO1C6O2 : 	2.58D+11*EXP(-3430/TEMP) 	;
{576.} 	 OH + HEXANO3 = C5H11CHO + NO2 : 	4.68D-12 	;
{577.} 	 HEXANO3 = HEXAO + NO2 : 	J(53) 	;
{578.} 	 OH + HEXAOOH = HEXAO2 : 	1.90D-12*EXP(190/TEMP) 	;
{579.} 	 OH + HEXAOOH = C5H11CHO + OH : 	1.52D-11 	;
{580.} 	 HEXAOOH = HEXAO + OH : 	J(41) 	;
{581.} 	 OH + HEXBOH = HEX2ONE + HO2 : 	1.28D-11 	;
{582.} 	 HEX2ONE + OH = HEX2ONAO2 : 	9.10D-12*0.715 	;
{583.} 	 HEX2ONE + OH = HEX2ONBO2 : 	9.10D-12*0.162 	;
{584.} 	 HEX2ONE + OH = HEX2ONCO2 : 	9.10D-12*0.123 	;
{585.} 	 HEX2ONE = CH3CO3 + NC4H9O2 : 	J(22) 	;
{586.} 	 HEXBO = HO2C6O2 : 	2.03D+11*EXP(-3430/TEMP) 	;
{587.} 	 OH + HEXBNO3 = HEX2ONE + NO2 : 	3.17D-12 	;
{588.} 	 HEXBNO3 = HEXBO + NO2 : 	J(54) 	;
{589.} 	 OH + HEXBOOH = HEXBO2 : 	1.90D-12*EXP(190/TEMP) 	;
{590.} 	 OH + HEXBOOH = HEX2ONE + OH : 	2.80D-11 	;
{591.} 	 HEXBOOH = HEXBO + OH : 	J(41) 	;
{592.} 	 OH + HEXCNO3 = HEX3ONE + NO2 : 	2.70D-12 	;
{593.} 	 HEXCNO3 = HEXCO + NO2 : 	J(54) 	;
{594.} 	 HEXCO = HO3C6O2 : 	3.05D+11*EXP(-4240/TEMP) 	;
{595.} 	 HEXCO = HEX3ONE + HO2 : 	KROSEC*O2 	;
{596.} 	 HEX3ONE + OH = HEX3ONDO2 : 	6.90D-12*0.110 	;
{597.} 	 HEX3ONE + OH = HEX3ONCO2 : 	6.90D-12*0.110 	;
{598.} 	 HEX3ONE + OH = HEX3ONBO2 : 	6.90D-12*0.142 	;
{599.} 	 HEX3ONE + OH = HEX3ONAO2 : 	6.90D-12*0.638 	;
{600.} 	 HEX3ONE = C2H5CO3 + NC3H7O2 : 	J(22) 	;
{601.} 	 OH + HEXCOH = HEX3ONE + HO2 : 	1.45D-11 	;
{602.} 	 OH + HEXCOOH = HEX3ONE + OH : 	3.23D-11 	;
{603.} 	 HEXCOOH = HEXCO + OH : 	J(41) 	;
{604.} 	 ETHOHNO3 + OH = HOCH2CHO + NO2 : 	8.40D-13 	;
{605.} 	 HOCH2CH2O = HO2 + HOCH2CHO : 	KROPRIM*O2 	;
{606.} 	 HOCH2CH2O = HO2 + HCHO + HCHO : 	9.50D+13*EXP(-5988/TEMP) 	;
{607.} 	 ETHGLY + OH = HOCH2CHO + HO2 : 	7.70D-12 	;
{608.} 	 HOCH2CHO + OH = HOCH2CO3 : 	1.00D-11*0.800 	;
{609.} 	 HOCH2CHO + OH = GLYOX + HO2 : 	1.00D-11*0.200 	;
{610.} 	 HOCH2CHO + NO3 = HOCH2CO3 + HNO3 : 	KNO3AL 	;
{611.} 	 HOCH2CHO = HO2 + HCHO + HO2 + CO : 	J(15) 	;
{612.} 	 HYETHO2H = HOCH2CH2O + OH : 	J(41) 	;
{613.} 	 HYETHO2H + OH = HOCH2CH2O2 : 	1.90D-12*EXP(190/TEMP) 	;
{614.} 	 HYETHO2H + OH = HOCH2CHO + OH : 	1.38D-11 	;
{615.} 	 ETHENO3O = NO3CH2CHO + HO2 : 	KROPRIM*O2 	;
{616.} 	 ETHENO3O = NO2 + HCHO + HCHO : 	7.00D+03 	;
{617.} 	 NO3CH2CHO + OH = NO3CH2CO3 : 	3.40D-12 	;
{618.} 	 NO3CH2CHO = NO2 + HCOCH2O : 	J(56) 	;
{619.} 	 NO3CH2CHO = HO2 + CO + HCHO + NO2 : 	J(57) 	;
{620.} 	 NO3CH2CHO + NO3 = NO3CH2CO3 + HNO3 : 	KNO3AL 	;
{621.} 	 ETHO2HNO3 = ETHENO3O + OH : 	J(41) 	;
{622.} 	 ETHO2HNO3 + OH = ETHENO3O2 : 	1.90D-12*EXP(190/TEMP) 	;
{623.} 	 ETHO2HNO3 + OH = NO3CH2CHO + OH : 	1.62D-12 	;
{624.} 	 CH2OO + CO = HCHO : 	1.20D-15 	;
{625.} 	 CH2OO = HCOOH : 	1.00D-17*H2O 	;
{626.} 	 CH2OO = HCHO + H2O2 : 	6.00D-18*H2O 	;
{627.} 	 CH2OO + NO = HCHO + NO2 : 	1.00D-14 	;
{628.} 	 CH2OO + SO2 = HCHO + SO3 : 	7.00D-14 	;
{629.} 	 CH2OO + NO2 = HCHO + NO3 : 	1.00D-15 	;
{630.} 	 ACETOL + OH = MGLYOX + HO2 : 	3.00D-12 	;
{631.} 	 ACETOL = CH3CO3 + HCHO + HO2 : 	J(22) 	;
{632.} 	 PROPGLY + OH = CH3CHOHCHO + HO2 : 	1.20D-11*0.387 	;
{633.} 	 PROPGLY + OH = ACETOL + HO2 : 	1.20D-11*0.613 	;
{634.} 	 HYPROPO = CH3CHO + HCHO + HO2 : 	2.00D+14*EXP(-6410/TEMP) 	;
{635.} 	 PROPOLNO3 + OH = ACETOL + NO2 : 	9.16D-13 	;
{636.} 	 HYPROPO2H = HYPROPO + OH : 	J(41) 	;
{637.} 	 HYPROPO2H + OH = HYPROPO2 : 	1.90D-12*EXP(190/TEMP) 	;
{638.} 	 HYPROPO2H + OH = ACETOL + OH : 	2.44D-11 	;
{639.} 	 PROLNO3 + OH = CH3CHOHCHO + NO2 : 	1.71D-12 	;
{640.} 	 IPROPOLO = CH3CHO + HCHO + HO2 : 	2.00D+14*EXP(-5505/TEMP) 	;
{641.} 	 CH3CHOHCHO + OH = CH3CHOHCO3 : 	2.65D-11 	;
{642.} 	 CH3CHOHCHO + NO3 = CH3CHOHCO3 + HNO3 : 	KNO3AL*2.4 	;
{643.} 	 CH3CHOHCHO = CH3CHO + HO2 + CO + HO2 : 	J(17) 	;
{644.} 	 IPROPOLO2H + OH = IPROPOLO2 : 	1.90D-12*EXP(190/TEMP) 	;
{645.} 	 IPROPOLO2H + OH = CH3CHOHCHO + OH : 	1.83D-11 	;
{646.} 	 IPROPOLO2H = IPROPOLO + OH : 	J(41) 	;
{647.} 	 CH3CHOO = CH3CO2H : 	1.00D-17*H2O 	;
{648.} 	 CH3CHOO + CO = CH3CHO : 	1.20D-15 	;
{649.} 	 CH3CHOO + NO = CH3CHO + NO2 : 	1.00D-14 	;
{650.} 	 CH3CHOO = CH3CHO + H2O2 : 	6.00D-18*H2O 	;
{651.} 	 CH3CHOO + NO2 = CH3CHO + NO3 : 	1.00D-15 	;
{652.} 	 CH3CHOO + SO2 = CH3CHO + SO3 : 	7.00D-14 	;
{653.} 	 PRONO3BO = NOA + HO2 : 	KROSEC*O2 	;
{654.} 	 PRONO3BO = CH3CHO + HCHO + NO2 : 	7.00D+03 	;
{655.} 	 NOA = CH3COCH2O + NO2 : 	J(56) 	;
{656.} 	 NOA + OH = MGLYOX + NO2 : 	1.30D-13 	;
{657.} 	 NOA = CH3CO3 + HCHO + NO2 : 	J(57) 	;
{658.} 	 PR2O2HNO3 = PRONO3BO + OH : 	J(41) 	;
{659.} 	 PR2O2HNO3 + OH = PRONO3BO2 : 	1.90D-12*EXP(190/TEMP) 	;
{660.} 	 PR2O2HNO3 + OH = NOA + OH : 	3.47D-12 	;
{661.} 	 PRONO3AO = CHOPRNO3 + HO2 : 	KROPRIM*O2 	;
{662.} 	 PRONO3AO = HCHO + CH3CHO + NO2 : 	7.00D+03 	;
{663.} 	 CHOPRNO3 + OH = PRNO3CO3 : 	3.55D-12 	;
{664.} 	 CHOPRNO3 = PROPALO + NO2 : 	J(56) 	;
{665.} 	 CHOPRNO3 = HO2 + CO + CH3CHO + NO2 : 	J(57) 	;
{666.} 	 CHOPRNO3 + NO3 = PRNO3CO3 + HNO3 : 	KNO3AL*2.4 	;
{667.} 	 PR1O2HNO3 = PRONO3AO + OH : 	J(41) 	;
{668.} 	 PR1O2HNO3 + OH = PRONO3AO2 : 	1.90D-12*EXP(190/TEMP) 	;
{669.} 	 PR1O2HNO3 + OH = CHOPRNO3 + OH : 	1.69D-12 	;
{670.} 	 NBUTOLAOH + OH = MEKCOH + HO2 : 	1.59D-11 	;
{671.} 	 MEKCOH + OH = EGLYOX + HO2 : 	3.44D-12 	;
{672.} 	 MEKCOH = C2H5CO3 + HCHO + HO2 : 	J(22) 	;
{673.} 	 NBUTOLAO = C2H5CHO + HCHO + HO2 : 	2.00D+14*EXP(-6354/TEMP) 	;
{674.} 	 NBUTOLANO3 + OH = MEKCOH + NO2 : 	1.27D-12 	;
{675.} 	 NBUTOLAOOH = NBUTOLAO + OH : 	J(41) 	;
{676.} 	 NBUTOLAOOH + OH = NBUTOLAO2 : 	1.90D-12*EXP(190/TEMP) 	;
{677.} 	 NBUTOLAOOH + OH = MEKCOH + OH : 	3.01D-11 	;
{678.} 	 HO3C4O = C2H5CHO + HCHO + HO2 : 	2.00D+14*EXP(-5538/TEMP) 	;
{679.} 	 HO3C3CHO + OH = HO3C3CO3 : 	3.08D-11 	;
{680.} 	 HO3C3CHO = C2H5CHO + HCHO + HO2 : 	J(15) 	;
{681.} 	 HO3C3CHO + NO3 = HO3C3CO3 + HNO3 : 	KNO3AL*4.0 	;
{682.} 	 HO3C4NO3 + OH = HO3C3CHO + NO2 : 	3.03D-12 	;
{683.} 	 HO3C4OOH = HO3C4O + OH : 	J(41) 	;
{684.} 	 HO3C4OOH + OH = HO3C4O2 : 	1.90D-12*EXP(190/TEMP) 	;
{685.} 	 HO3C4OOH + OH = HO3C3CHO + OH : 	2.14D-11 	;
{686.} 	 BU1ENO3O = CO3C4NO3 + HO2 : 	KROSEC*O2 	;
{687.} 	 BU1ENO3O = C2H5CHO + HCHO + NO2 : 	7.00D+03 	;
{688.} 	 CO3C4NO3 + OH = CO3C4NO3O2 : 	9.10D-13 	;
{689.} 	 CO3C4NO3 = MEKCO + NO2 : 	J(56) 	;
{690.} 	 CO3C4NO3 = C2H5CO3 + HCHO + NO2 : 	J(57) 	;
{691.} 	 BU1ENO3OOH = BU1ENO3O + OH : 	J(41) 	;
{692.} 	 BU1ENO3OOH + OH = BU1ENO3O2 : 	8.97D-12 	;
{693.} 	 C43NO34O = BUTAL2NO3 + HO2 : 	KROPRIM*O2 	;
{694.} 	 C43NO34O = C2H5CHO + HCHO + NO2 : 	7.00D+03 	;
{695.} 	 BUTAL2NO3 = BUTAL2O + NO2 : 	J(54) 	;
{696.} 	 BUTAL2NO3 + OH = EGLYOX + NO2 : 	4.44D-12 	;
{697.} 	 BUTAL2NO3 = C2H5CHO + HO2 + CO + NO2 : 	J(17) 	;
{698.} 	 C43NO34OOH = C43NO34O + OH : 	J(41) 	;
{699.} 	 C43NO34OOH + OH = C43NO34O2 : 	5.64D-12 	;
{700.} 	 C2H5CO3 = C2H5O2 : 	1.00D-11*0.7*RO2 	;
{701.} 	 C2H5CO3 = PROPACID : 	1.00D-11*0.3*RO2 	;
{702.} 	 C2H5CO3 + NO2 = PPN : 	KFPAN 	;
{703.} 	 C2H5CO3 + HO2 = PERPROACID : 	KAPHO2*0.71 	;
{704.} 	 C2H5CO3 + HO2 = PROPACID + O3 : 	KAPHO2*0.29 	;
{705.} 	 C2H5CO3 + NO = NO2 + C2H5O2 : 	KAPNO 	;
{706.} 	 C2H5CO3 + NO3 = C2H5O2 + NO2 : 	KRO2NO3*1.60 	;
{707.} 	 C2H5CHOO + CO = C2H5CHO : 	1.20D-15 	;
{708.} 	 C2H5CHOO = PROPACID : 	1.00D-17*H2O 	;
{709.} 	 C2H5CHOO + NO = C2H5CHO + NO2 : 	1.00D-14 	;
{710.} 	 C2H5CHOO = C2H5CHO + H2O2 : 	6.00D-18*H2O 	;
{711.} 	 C2H5CHOO + SO2 = C2H5CHO + SO3 : 	7.00D-14 	;
{712.} 	 C2H5CHOO + NO2 = C2H5CHO + NO3 : 	1.00D-15 	;
{713.} 	 HCOCO3 = HCOCO2H : 	1.00D-11*0.3*RO2 	;
{714.} 	 HCOCO3 = CO + HO2 : 	1.00D-11*0.7*RO2 	;
{715.} 	 HCOCO3 + HO2 = HCOCO2H + O3 : 	KAPHO2*0.29 	;
{716.} 	 HCOCO3 + HO2 = HCOCO3H : 	KAPHO2*0.71 	;
{717.} 	 HCOCO3 + NO2 = GLYPAN : 	KFPAN 	;
{718.} 	 HCOCO3 + NO = HO2 + CO + NO2 : 	KAPNO 	;
{719.} 	 HCOCO3 + NO3 = HO2 + CO + NO2 : 	KRO2NO3*1.60 	;
{720.} 	 BZBIPERNO3 = BZBIPERO + NO2 : 	J(54) 	;
{721.} 	 BZBIPERNO3 + OH = BZOBIPEROH + NO2 : 	7.30D-11 	;
{722.} 	 BZBIPERO = GLYOX + MALDIAL + HO2 : 	KDEC*0.50 	;
{723.} 	 BZBIPERO = GLYOX + BZFUONE + HO2 : 	KDEC*0.50 	;
{724.} 	 BZBIPER2OH + OH = BZOBIPEROH + HO2 : 	1.21D-10 	;
{725.} 	 BZOBIPEROH + OH = MALDIALCO3 + GLYOX : 	8.16D-11 	;
{726.} 	 BZOBIPEROH = MALDIALCO3 + GLYOX + HO2 : 	J(22) 	;
{727.} 	 BZBIPEROOH = BZBIPERO + OH : 	J(41) 	;
{728.} 	 BZBIPEROOH + OH = BZOBIPEROH + OH : 	9.77D-11 	;
{729.} 	 BZEMUCO2 + NO = BZEMUCNO3 : 	KRO2NO*0.105 	;
{730.} 	 BZEMUCO2 = BZEMUCO : 	8.80D-13*0.6*RO2 	;
{731.} 	 BZEMUCO2 = BZEMUCOH : 	8.80D-13*0.2*RO2 	;
{732.} 	 BZEMUCO2 = BZEMUCCO : 	8.80D-13*0.2*RO2 	;
{733.} 	 BZEMUCO2 + NO = BZEMUCO + NO2 : 	KRO2NO*0.895 	;
{734.} 	 BZEMUCO2 + HO2 = BZEMUCOOH : 	KRO2HO2*0.77 	;
{735.} 	 BZEMUCO2 + NO3 = BZEMUCO + NO2 : 	KRO2NO3 	;
{736.} 	 BZEMUCCO3 = BZEMUCCO2H : 	1.00D-11*RO2*0.3 	;
{737.} 	 BZEMUCCO3 = C5DIALO2 : 	1.00D-11*RO2*0.7 	;
{738.} 	 BZEMUCCO3 + NO = C5DIALO2 + NO2 : 	KAPNO 	;
{739.} 	 BZEMUCCO3 + NO2 = BZEMUCPAN : 	KFPAN 	;
{740.} 	 BZEMUCCO3 + HO2 = BZEMUCCO3H : 	KAPHO2*0.71 	;
{741.} 	 BZEMUCCO3 + HO2 = BZEMUCCO2H + O3 : 	KAPHO2*0.29 	;
{742.} 	 BZEMUCCO3 + NO3 = C5DIALO2 + NO2 : 	KRO2NO3*1.60 	;
{743.} 	 EPXC4DIAL + OH = EPXDLCO3 : 	4.32D-11 	;
{744.} 	 EPXC4DIAL = C3DIALO2 + CO + HO2 : 	J(17)*2 	;
{745.} 	 EPXC4DIAL + NO3 = EPXDLCO3 + HNO3 : 	2*KNO3AL*4.0 	;
{746.} 	 GLYOOA = GLYOO : 	KDEC*0.18 	;
{747.} 	 GLYOOA = OH + HO2 + CO + CO : 	KDEC*0.57 	;
{748.} 	 GLYOOA = HCHO : 	KDEC*0.125 	;
{749.} 	 GLYOOA = HO2 + HO2 + CO : 	KDEC*0.125 	;
{750.} 	 C5DIALO2 = C5DIALCO : 	8.80D-13*RO2*0.2 	;
{751.} 	 C5DIALO2 = C5DIALOH : 	8.80D-13*RO2*0.2 	;
{752.} 	 C5DIALO2 = C5DIALO : 	8.80D-13*RO2*0.6 	;
{753.} 	 C5DIALO2 + HO2 = C5DIALOOH : 	KRO2HO2*0.706 	;
{754.} 	 C5DIALO2 + NO = C5DIALO + NO2 : 	KRO2NO 	;
{755.} 	 C5DIALO2 + NO3 = C5DIALO + NO2 : 	KRO2NO3 	;
{756.} 	 MALDIAL + OH = MALDIALO2 : 	5.20D-11*0.17 	;
{757.} 	 MALDIAL + OH = MALDIALCO3 : 	5.20D-11*0.83 	;
{758.} 	 MALDIAL = BZFUONE : 	J(4)*0.14*0.4 	;
{759.} 	 MALDIAL + O3 = GLYOX + GLYOOA : 	2.00D-18 	;
{760.} 	 MALDIAL = MALDIALCO3 + HO2 : 	J(4)*0.14*0.6 	;
{761.} 	 MALDIAL + NO3 = MALDIALCO3 + HNO3 : 	2*KNO3AL*2.0 	;
{762.} 	 C6H5O + O3 = C6H5O2 : 	2.86D-13 	;
{763.} 	 C6H5O + NO2 = HOC6H4NO2 : 	2.08D-12 	;
{764.} 	 PHENO2 = PHENO : 	8.00D-13*RO2*0.7 	;
{765.} 	 PHENO2 = PHENOH : 	8.00D-13*RO2*0.3 	;
{766.} 	 PHENO2 + NO = PHENO + NO2 : 	KRO2NO 	;
{767.} 	 PHENO2 + HO2 = PHENOOH : 	KRO2HO2*0.770 	;
{768.} 	 PHENO2 + NO3 = PHENO + NO2 : 	KRO2NO3 	;
{769.} 	 CATECHOL + OH = CATEC1O : 	1.04D-10 	;
{770.} 	 CATECHOL + O3 = CATECOOA : 	9.6D-18 	;
{771.} 	 CATECHOL + NO3 = CATEC1O + HNO3 : 	8.76D-11 	;
{772.} 	 NPHENO2 = NPHENO : 	8.00D-13*RO2*0.7 	;
{773.} 	 NPHENO2 = NPHENOH : 	8.00D-13*RO2*0.3 	;
{774.} 	 NPHENO2 + NO = NPHENO + NO2 : 	KRO2NO 	;
{775.} 	 NPHENO2 + HO2 = NPHENOOH : 	KRO2HO2*0.770 	;
{776.} 	 NPHENO2 + NO3 = NPHENO + NO2 : 	KRO2NO3 	;
{777.} 	 C6H5CH2OH + OH = BENZAL + HO2 : 	8.93D-12 	;
{778.} 	 OH + BENZAL = C6H5CO3 : 	1.29D-11 	;
{779.} 	 BENZAL = HO2 + CO + C6H5O2 : 	J(18) 	;
{780.} 	 BENZAL = HO2 + C6H5CO3 : 	J(19) 	;
{781.} 	 NO3 + BENZAL = C6H5CO3 + HNO3 : 	2.40D-15 	;
{782.} 	 C6H5CH2O = BENZAL + HO2 : 	KROPRIM*O2 	;
{783.} 	 C6H5CH2NO3 = C6H5CH2O + NO2 : 	J(53) 	;
{784.} 	 C6H5CH2NO3 + OH = BENZAL + NO2 : 	6.03D-12 	;
{785.} 	 C6H5CH2OOH = C6H5CH2O + OH : 	J(41) 	;
{786.} 	 C6H5CH2OOH + OH = BENZAL + OH : 	2.05D-11 	;
{787.} 	 TLBIPERNO3 = TLBIPERO + NO2 : 	J(54) 	;
{788.} 	 TLBIPERNO3 + OH = TLOBIPEROH + NO2 : 	7.16D-11 	;
{789.} 	 TLBIPERO = GLYOX + TLFUONE + HO2 : 	KDEC*0.2 	;
{790.} 	 TLBIPERO = GLYOX + C5DICARB + HO2 : 	KDEC*0.2 	;
{791.} 	 TLBIPERO = MGLYOX + MALDIAL + HO2 : 	KDEC*0.2 	;
{792.} 	 TLBIPERO = GLYOX + C4MDIAL + HO2 : 	KDEC*0.2 	;
{793.} 	 TLBIPERO = MGLYOX + BZFUONE + HO2 : 	KDEC*0.2 	;
{794.} 	 TLBIPER2OH + OH = TLOBIPEROH + HO2 : 	1.20D-10 	;
{795.} 	 TLOBIPEROH + OH = C5CO14O2 + GLYOX : 	7.99D-11 	;
{796.} 	 TLOBIPEROH = C5CO14O2 + GLYOX + HO2 : 	J(22) 	;
{797.} 	 TLBIPEROOH = TLBIPERO + OH : 	J(41) 	;
{798.} 	 TLBIPEROOH + OH = TLOBIPEROH + OH : 	9.64D-11 	;
{799.} 	 TLEMUCO2 + NO = TLEMUCNO3 : 	KRO2NO*0.105 	;
{800.} 	 TLEMUCO2 = TLEMUCO : 	8.80D-13*RO2*0.60 	;
{801.} 	 TLEMUCO2 = TLEMUCOH : 	8.80D-13*RO2*0.20 	;
{802.} 	 TLEMUCO2 = TLEMUCCO : 	8.80D-13*RO2*0.20 	;
{803.} 	 TLEMUCO2 + NO = TLEMUCO + NO2 : 	KRO2NO*0.895 	;
{804.} 	 TLEMUCO2 + HO2 = TLEMUCOOH : 	KRO2HO2*0.820 	;
{805.} 	 TLEMUCO2 + NO3 = TLEMUCO + NO2 : 	KRO2NO3 	;
{806.} 	 TLEMUCCO3 = TLEMUCCO2H : 	1.00D-11*RO2*0.3 	;
{807.} 	 TLEMUCCO3 = C615CO2O2 : 	1.00D-11*RO2*0.7 	;
{808.} 	 TLEMUCCO3 + NO = C615CO2O2 + NO2 : 	KAPNO 	;
{809.} 	 TLEMUCCO3 + NO2 = TLEMUCPAN : 	KFPAN 	;
{810.} 	 TLEMUCCO3 + HO2 = TLEMUCCO3H : 	KAPHO2*0.71 	;
{811.} 	 TLEMUCCO3 + HO2 = TLEMUCCO2H + O3 : 	KAPHO2*0.29 	;
{812.} 	 TLEMUCCO3 + NO3 = C615CO2O2 + NO2 : 	KRO2NO3*1.60 	;
{813.} 	 C615CO2O2 = C6125CO : 	8.80D-13*RO2*0.2 	;
{814.} 	 C615CO2O2 = C615CO2OH : 	8.80D-13*RO2*0.2 	;
{815.} 	 C615CO2O2 = C615CO2O : 	8.80D-13*RO2*0.6 	;
{816.} 	 C615CO2O2 + HO2 = C615CO2OOH : 	KRO2HO2*0.770 	;
{817.} 	 C615CO2O2 + NO = C615CO2O + NO2 : 	KRO2NO 	;
{818.} 	 C615CO2O2 + NO3 = C615CO2O + NO2 : 	KRO2NO3 	;
{819.} 	 MGLOOB = MGLOO : 	KDEC*0.18 	;
{820.} 	 MGLOOB = CH3CO3 + CO + OH : 	KDEC*0.57 	;
{821.} 	 MGLOOB = CH3CHO : 	KDEC*0.125 	;
{822.} 	 MGLOOB = CH3CO3 + HO2 : 	KDEC*0.125 	;
{823.} 	 TOL1O + O3 = OXYL1O2 : 	2.86D-13 	;
{824.} 	 TOL1O + NO2 = TOL1OHNO2 : 	2.08D-12 	;
{825.} 	 CRESO2 = CRESO : 	8.00D-13*RO2*0.70 	;
{826.} 	 CRESO2 = CRESOH : 	8.00D-13*RO2*0.30 	;
{827.} 	 CRESO2 + NO = CRESO + NO2 : 	KRO2NO 	;
{828.} 	 CRESO2 + HO2 = CRESOOH : 	KRO2HO2*0.820 	;
{829.} 	 CRESO2 + NO3 = CRESO + NO2 : 	KRO2NO3 	;
{830.} 	 MCATECHOL + OH = MCATEC1O : 	2.05D-10*1.0 	;
{831.} 	 MCATECHOL + O3 = MCATECOOA : 	2.81D-17 	;
{832.} 	 MCATECHOL + NO3 = MCATEC1O + HNO3 : 	2.01D-10*1.0 	;
{833.} 	 NCRESO2 = NCRESO : 	8.00D-13*RO2*0.70 	;
{834.} 	 NCRESO2 = NCRESOH : 	8.00D-13*RO2*0.30 	;
{835.} 	 NCRESO2 + NO = NCRESO + NO2 : 	KRO2NO 	;
{836.} 	 NCRESO2 + HO2 = NCRESOOH : 	KRO2HO2*0.820 	;
{837.} 	 NCRESO2 + NO3 = NCRESO + NO2 : 	KRO2NO3 	;
{838.} 	 OH + ISOPANO3 = HC4ACHO + NO2 : 	8.91D-11 	;
{839.} 	 ISOPANO3 = ISOPAO + NO2 : 	J(53) 	;
{840.} 	 ISOPAO = HC4CCHO + HO2 : 	8.4D+10*EXP(-3523/TEMP) 	;
{841.} 	 OH + HC4ACHO = C58O2 : 	4.52D-11*0.52 	;
{842.} 	 OH + HC4ACHO = HC4ACO3 : 	4.52D-11*0.48 	;
{843.} 	 O3 + HC4ACHO = ACETOL + GLYOOC : 	2.40D-17*0.5 	;
{844.} 	 O3 + HC4ACHO = ACLOOA + GLYOX : 	2.40D-17*0.5 	;
{845.} 	 HC4ACHO = HC4ACO3 + HO2 : 	J(19) 	;
{846.} 	 NO3 + HC4ACHO = HC4ACO3 + HNO3 : 	KNO3AL*4.25 	;
{847.} 	 HC4ACHO = ACETOL + HO2 + HO2 + CO + CO : 	J(18) 	;
{848.} 	 OH + ISOPAOH = HC4CCHO + HO2 : 	9.30D-11*0.5 	;
{849.} 	 OH + ISOPAOH = HC4ACHO + HO2 : 	9.30D-11*0.5 	;
{850.} 	 OH + ISOPAOOH = HC4ACHO + OH : 	1.07D-10 	;
{851.} 	 ISOPAOOH = ISOPAO + OH : 	J(41) 	;
{852.} 	 ISOPBNO3 = ISOPBO + NO2 : 	J(55) 	;
{853.} 	 OH + ISOPBNO3 = MVK + HCHO + NO2 : 	3.55D-11 	;
{854.} 	 ISOPBO = MVKOH + CH3O2 : 	KDEC*0.25 	;
{855.} 	 ISOPBO = MVK + HCHO + HO2 : 	KDEC*0.75 	;
{856.} 	 OH + ISOPBOH = ISOPBO : 	3.85D-11 	;
{857.} 	 OH + ISOPBOOH = ISOPBO2 : 	4.20D-11 	;
{858.} 	 ISOPBOOH = ISOPBO + OH : 	J(41) 	;
{859.} 	 OH + ISOPCNO3 = HC4CCHO + NO2 : 	8.91D-11 	;
{860.} 	 ISOPCNO3 = ISOPCO + NO2 : 	J(53) 	;
{861.} 	 ISOPCO = HC4ACHO + HO2 : 	8.4D+10*EXP(-3523/TEMP) 	;
{862.} 	 OH + HC4CCHO = HC4CCO3 : 	4.52D-11*0.48 	;
{863.} 	 OH + HC4CCHO = C57O2 : 	4.52D-11*0.52 	;
{864.} 	 O3 + HC4CCHO = MGLYOX + GAOOB : 	2.40D-17*0.5 	;
{865.} 	 O3 + HC4CCHO = MGLYOOA + HOCH2CHO : 	2.40D-17*0.5 	;
{866.} 	 HC4CCHO = HC4CCO3 + HO2 : 	J(19) 	;
{867.} 	 HC4CCHO = CH3CO3 + HO2 + CO + HOCH2CHO : 	J(18) 	;
{868.} 	 NO3 + HC4CCHO = HC4CCO3 + HNO3 : 	KNO3AL*4.25 	;
{869.} 	 OH + ISOPCOOH = HC4CCHO + OH : 	1.07D-10 	;
{870.} 	 ISOPCOOH = ISOPCO + OH : 	J(41) 	;
{871.} 	 OH + HCOC5 = C59O2 : 	3.81D-11 	;
{872.} 	 HCOC5 = CH3CO3 + HCHO + HOCH2CO3 : 	J(24) 	;
{873.} 	 OH + ISOPDOH = HCOC5 + HO2 : 	7.38D-11 	;
{874.} 	 ISOPDO = MACR + HCHO + HO2 : 	KDEC 	;
{875.} 	 OH + ISOPDNO3 = HCOC5 + NO2 : 	6.10D-11 	;
{876.} 	 ISOPDNO3 = ISOPDO + NO2 : 	J(54) 	;
{877.} 	 OH + ISOPDOOH = HCOC5 + OH : 	1.07D-10 	;
{878.} 	 ISOPDOOH = ISOPDO + OH : 	J(41) 	;
{879.} 	 OH + NISOPNO3 = NC4CHO + NO2 : 	8.55D-11 	;
{880.} 	 NISOPNO3 = NISOPO + NO2 : 	J(53)*2.0 	;
{881.} 	 NISOPO = NC4CHO + HO2 : 	KROPRIM*O2 	;
{882.} 	 OH + NC4CHO = NC4CO3 : 	4.16D-11*0.48 	;
{883.} 	 OH + NC4CHO = C510O2 : 	4.16D-11*0.52 	;
{884.} 	 O3 + NC4CHO = NOA + GLYOOC : 	2.40D-17*0.5 	;
{885.} 	 O3 + NC4CHO = NOAOOA + GLYOX : 	2.40D-17*0.5 	;
{886.} 	 NO3 + NC4CHO = NC4CO3 + HNO3 : 	KNO3AL*4.25 	;
{887.} 	 NC4CHO = NOA + CO + CO + HO2 + HO2 : 	J(18) 	;
{888.} 	 OH + NISOPOOH = NC4CHO + OH : 	1.03D-10 	;
{889.} 	 NISOPOOH = NISOPO + OH : 	J(41) 	;
{890.} 	 HMVKAO2 = CO2H3CHO : 	2.00D-12*0.2*RO2 	;
{891.} 	 HMVKAO2 = HO12CO3C4 : 	2.00D-12*0.2*RO2 	;
{892.} 	 HMVKAO2 = HMVKAO : 	2.00D-12*0.6*RO2 	;
{893.} 	 HMVKAO2 + NO = HMVKANO3 : 	KRO2NO*0.017 	;
{894.} 	 HMVKAO2 + HO2 = HMVKAOOH : 	KRO2HO2*0.625 	;
{895.} 	 HMVKAO2 + NO = HMVKAO + NO2 : 	KRO2NO*0.983 	;
{896.} 	 HMVKAO2 + NO3 = HMVKAO + NO2 : 	KRO2NO3 	;
{897.} 	 HMVKBO2 = BIACETOH : 	8.80D-13*0.2*RO2 	;
{898.} 	 HMVKBO2 = HO12CO3C4 : 	8.80D-13*0.2*RO2 	;
{899.} 	 HMVKBO2 = HMVKBO : 	8.80D-13*0.6*RO2 	;
{900.} 	 HMVKBO2 + HO2 = HMVKBOOH : 	KRO2HO2*0.625 	;
{901.} 	 HMVKBO2 + NO = HMVKBO + NO2 : 	KRO2NO 	;
{902.} 	 HMVKBO2 + NO3 = HMVKBO + NO2 : 	KRO2NO3 	;
{903.} 	 OH + MGLYOX = CH3CO3 + CO : 	1.72D-11 	;
{904.} 	 MGLYOX = CH3CO3 + CO + HO2 : 	J(34) 	;
{905.} 	 NO3 + MGLYOX = CH3CO3 + CO + HNO3 : 	KNO3AL*2.4 	;
{906.} 	 MGLOOA = MGLOO : 	KDEC*0.24 	;
{907.} 	 MGLOOA = OH + CO + CH3CO3 : 	KDEC*0.36 	;
{908.} 	 MGLOOA = CH3CHO : 	KDEC*0.20 	;
{909.} 	 MGLOOA = CH3CO3 + HCHO + HO2 : 	KDEC*0.20 	;
{910.} 	 MVKOO + CO = MVK : 	1.2D-15 	;
{911.} 	 MVKOO + NO = MVK + NO2 : 	1.0D-14 	;
{912.} 	 MVKOO = MVK + H2O2 : 	6.0D-18*H2O 	;
{913.} 	 MVKOO + SO2 = MVK + SO3 : 	7.0D-14 	;
{914.} 	 MVKOO + NO2 = MVK + NO3 : 	1.0D-15 	;
{915.} 	 MVKO2 = MVKO : 	2.00D-12*0.6*RO2 	;
{916.} 	 MVKO2 = MVKOH : 	2.00D-12*0.2*RO2 	;
{917.} 	 MVKO2 = VGLYOX : 	2.00D-12*0.2*RO2 	;
{918.} 	 MVKO2 + NO = MVKO + NO2 : 	KRO2NO 	;
{919.} 	 MVKO2 + HO2 = MVKOOH : 	KRO2HO2*0.625 	;
{920.} 	 MVKO2 + NO3 = MVKO + NO2 : 	KRO2NO3 	;
{921.} 	 MACROHO2 = MACROH : 	1.4D-12*0.2*RO2 	;
{922.} 	 MACROHO2 = C3MDIALOH : 	1.4D-12*0.2*RO2 	;
{923.} 	 MACROHO2 = MACROHO : 	1.4D-12*0.6*RO2 	;
{924.} 	 MACROHO2 + NO = MACROHONO3 : 	0.93D-11*0.5 	;
{925.} 	 MACROHO2 + HO2 = MACROHOOH : 	KRO2HO2*0.625 	;
{926.} 	 MACROHO2 + NO = MACROHO + NO2 : 	0.93D-11*0.5 	;
{927.} 	 MACROHO2 + NO3 = MACROHO + NO2 : 	KRO2NO3 	;
{928.} 	 MACRO2 = MACRO : 	9.20D-14*0.7*RO2 	;
{929.} 	 MACRO2 = MACROH : 	9.20D-14*0.3*RO2 	;
{930.} 	 MACRO2 + NO = MACROHONO2 : 	0.93D-11*0.5 	;
{931.} 	 MACRO2 + NO = MACRO + NO2 : 	0.93D-11*0.5 	;
{932.} 	 MACRO2 + HO2 = MACROOH : 	KRO2HO2*0.625 	;
{933.} 	 MACRO2 + NO3 = MACRO + NO2 : 	KRO2NO3 	;
{934.} 	 MACO3 = MACO2H : 	5.0D-12*0.3*RO2+1.00D-11*0.3*RO2 	;
{935.} 	 MACO3 = CH3CO3 + HCHO : 	5.0D-12*0.7*RO2+1.00D-11*0.7*RO2 	;
{936.} 	 MACO3 + HO2 = MACO2H + OH : 	KAPHO2*0.29 	;
{937.} 	 MACO3 + NO = CH3C2H5O2 + NO2 : 	8.70D-12*EXP(290/TEMP) 	;
{938.} 	 MACO3 + HO2 = MACO2H + O3 : 	KAPHO2*0.29 	;
{939.} 	 MACO3 + HO2 = MACO3H : 	KAPHO2*0.71 	;
{940.} 	 MACO3 + NO2 = MPAN : 	KFPAN 	;
{941.} 	 MACO3 + NO3 = CH3C2H5O2 + NO2 : 	KRO2NO3*1.60 	;
{942.} 	 CH2OOG = CO : 	KDEC*0.47 	;
{943.} 	 CH2OOG = CH2OO : 	KDEC*0.37 	;
{944.} 	 CH2OOG = HO2 + CO + OH : 	KDEC*0.16 	;
{945.} 	 CH2OOC = CH2OO : 	KDEC*0.18 	;
{946.} 	 CH2OOC = HO2 + CO + OH : 	KDEC*0.82 	;
{947.} 	 MGLYOOB = MGLYOO : 	KDEC*0.18 	;
{948.} 	 MGLYOOB = OH + CO + CH3CO3 : 	KDEC*0.82 	;
{949.} 	 MACROO + CO = MACR : 	1.2D-15 	;
{950.} 	 MACROO = MACO2H : 	1.0D-17*H2O 	;
{951.} 	 MACROO + NO = MACR + NO2 : 	1.0D-14 	;
{952.} 	 MACROO = MACR + H2O2 : 	6.0D-18*H2O 	;
{953.} 	 MACROO + SO2 = MACR + SO3 : 	7.0D-14 	;
{954.} 	 MACROO + NO2 = MACR + NO3 : 	1.0D-15 	;
{955.} 	 CH3COCH2O = CH3CO3 + HCHO : 	KDEC 	;
{956.} 	 HYPERACET + OH = CH3COCH2O2 : 	1.90D-12*EXP(190/TEMP) 	;
{957.} 	 HYPERACET + OH = MGLYOX + OH : 	8.39D-12 	;
{958.} 	 HYPERACET = CH3COCH2O + OH : 	J(41) 	;
{959.} 	 HYPERACET = CH3CO3 + HCHO + OH : 	J(22) 	;
{960.} 	 DMSO + OH = MSIA + CH3O2 : 	6.10D-12*EXP(800/TEMP) 	;
{961.} 	 DMSO2 + OH = DMSO2O2 : 	4.40D-14 	;
{962.} 	 CH3SCH2O = CH3S + HCHO : 	KDEC 	;
{963.} 	 CH3SCHO + OH = CH3S + CO : 	1.11D-11 	;
{964.} 	 CH3SCHO = CH3S + CO + HO2 : 	J(15) 	;
{965.} 	 CH3SCH2OH + OH = CH3SCHO + HO2 : 	2.78D-11 	;
{966.} 	 CH3SCH2OOH = CH3SCH2O + OH : 	J(41) 	;
{967.} 	 CH3SCH2OOH + OH = CH3SCHO + OH : 	7.03D-11 	;
{968.} 	 HO1C3O2 = HOC3H6OH : 	6.00D-13*0.2*RO2 	;
{969.} 	 HO1C3O2 = HOC2H4CHO : 	6.00D-13*0.2*RO2 	;
{970.} 	 HO1C3O2 = HO1C3O : 	6.00D-13*0.6*RO2 	;
{971.} 	 HO1C3O2 + NO = HO1C3NO3 : 	KRO2NO*0.019 	;
{972.} 	 HO1C3O2 + HO2 = HO1C3OOH : 	KRO2HO2*0.520 	;
{973.} 	 HO1C3O2 + NO = HO1C3O + NO2 : 	KRO2NO*0.981 	;
{974.} 	 HO1C3O2 + NO3 = HO1C3O + NO2 : 	KRO2NO3 	;
{975.} 	 NBUTOLBO2 = NBUTOLBO : 	8.80D-13*0.6*RO2 	;
{976.} 	 NBUTOLBO2 = MEKAOH : 	8.80D-13*0.2*RO2 	;
{977.} 	 NBUTOLBO2 = HO2C4OH : 	8.80D-13*0.2*RO2 	;
{978.} 	 NBUTOLBO2 + NO = NBUTOLBNO3 : 	KRO2NO*0.083 	;
{979.} 	 NBUTOLBO2 + HO2 = NBUTOLBOOH : 	KRO2HO2*0.625 	;
{980.} 	 NBUTOLBO2 + NO = NBUTOLBO + NO2 : 	KRO2NO*0.917 	;
{981.} 	 NBUTOLBO2 + NO3 = NBUTOLBO + NO2 : 	KRO2NO3 	;
{982.} 	 BUTALO2 + NO = BUTALNO3 : 	KRO2NO*0.083 	;
{983.} 	 BUTALO2 = BUTALO : 	2.50D-13*0.6*RO2 	;
{984.} 	 BUTALO2 = CO2C3CHO : 	2.50D-13*0.2*RO2 	;
{985.} 	 BUTALO2 = HO2C3CHO : 	2.50D-13*0.2*RO2 	;
{986.} 	 BUTALO2 + NO = BUTALO + NO2 : 	KRO2NO*0.917 	;
{987.} 	 BUTALO2 + HO2 = BUTALO2H : 	KRO2HO2*0.625 	;
{988.} 	 BUTALO2 + NO3 = BUTALO + NO2 : 	KRO2NO3 	;
{989.} 	 C3H7CO3 = BUTACID : 	1.00D-11*0.3*RO2 	;
{990.} 	 C3H7CO3 = NC3H7O2 : 	1.00D-11*0.7*RO2 	;
{991.} 	 C3H7CO3 + NO = NO2 + NC3H7O2 : 	KAPNO 	;
{992.} 	 C3H7CO3 + NO2 = PBN : 	KFPAN 	;
{993.} 	 C3H7CO3 + HO2 = BUTACID + O3 : 	KAPHO2*0.29 	;
{994.} 	 C3H7CO3 + HO2 = PERBUACID : 	KAPHO2*0.71 	;
{995.} 	 C3H7CO3 + NO3 = NC3H7O2 + NO2 : 	KRO2NO3*1.60 	;
{996.} 	 HO1C4O2 + NO = HO1C4NO3 : 	KRO2NO*0.013 	;
{997.} 	 HO1C4O2 = HO1C4O : 	1.30D-12*0.6*RO2 	;
{998.} 	 HO1C4O2 = HOC3H6CHO : 	1.30D-12*0.2*RO2 	;
{999.} 	 HO1C4O2 = HOC4H8OH : 	1.30D-12*0.2*RO2 	;
{1000.} 	 HO1C4O2 + NO = HO1C4O + NO2 : 	KRO2NO*0.987 	;
{1001.} 	 HO1C4O2 + HO2 = HO1C4OOH : 	KRO2HO2*0.625 	;
{1002.} 	 HO1C4O2 + NO3 = HO1C4O + NO2 : 	KRO2NO3 	;
{1003.} 	 BUT2OLO2 = BUT2OLOH : 	8.80D-13*0.2*RO2 	;
{1004.} 	 BUT2OLO2 = BUT2OLO : 	8.80D-13*0.2*RO2 	;
{1005.} 	 BUT2OLO2 = BUT2OLAO : 	8.80D-13*0.6*RO2 	;
{1006.} 	 BUT2OLO2 + NO = BUT2OLNO3 : 	KRO2NO*0.041 	;
{1007.} 	 BUT2OLO2 + HO2 = BUT2OLOOH : 	KRO2HO2*0.625 	;
{1008.} 	 BUT2OLO2 + NO = BUT2OLAO + NO2 : 	KRO2NO*0.959 	;
{1009.} 	 BUT2OLO2 + NO3 = BUT2OLAO + NO2 : 	KRO2NO3 	;
{1010.} 	 MEKAO2 + NO = MEKANO3 : 	KRO2NO*0.033 	;
{1011.} 	 MEKAO2 = CO2C3CHO : 	2.00D-12*0.2*RO2 	;
{1012.} 	 MEKAO2 = MEKAOH : 	2.00D-12*0.2*RO2 	;
{1013.} 	 MEKAO2 = MEKAO : 	2.00D-12*0.6*RO2 	;
{1014.} 	 MEKAO2 + HO2 = MEKAOOH : 	KRO2HO2*0.625 	;
{1015.} 	 MEKAO2 + NO = MEKAO + NO2 : 	KRO2NO*0.967 	;
{1016.} 	 MEKAO2 + NO3 = MEKAO + NO2 : 	KRO2NO3 	;
{1017.} 	 MEKCO2 = MEKCO : 	2.00D-12*0.6*RO2 	;
{1018.} 	 MEKCO2 = EGLYOX : 	2.00D-12*0.2*RO2 	;
{1019.} 	 MEKCO2 = MEKCOH : 	2.00D-12*0.2*RO2 	;
{1020.} 	 MEKCO2 + HO2 = MEKCOOH : 	KRO2HO2*0.625 	;
{1021.} 	 MEKCO2 + NO = MEKCO + NO2 : 	KRO2NO 	;
{1022.} 	 MEKCO2 + NO3 = MEKCO + NO2 : 	KRO2NO3 	;
{1023.} 	 MEKBO2 = BUT2OLO : 	8.80D-13*0.2*RO2 	;
{1024.} 	 MEKBO2 = BIACET : 	8.80D-13*0.2*RO2 	;
{1025.} 	 MEKBO2 = MEKBO : 	8.80D-13*0.6*RO2 	;
{1026.} 	 MEKBO2 + HO2 = MEKBOOH : 	KRO2HO2*0.625 	;
{1027.} 	 MEKBO2 + NO = MEKBO + NO2 : 	KRO2NO 	;
{1028.} 	 MEKBO2 + NO3 = MEKBO + NO2 : 	KRO2NO3 	;
{1029.} 	 IBUTOLBO2 = IBUTOLOHB : 	9.20D-14*0.3*RO2 	;
{1030.} 	 IBUTOLBO2 = IBUTOLBO : 	9.20D-14*0.7*RO2 	;
{1031.} 	 IBUTOLBO2 + NO = IBUTOLBNO3 : 	KRO2NO*0.012 	;
{1032.} 	 IBUTOLBO2 + NO = IBUTOLBO + NO2 : 	KRO2NO*0.988 	;
{1033.} 	 IBUTOLBO2 + HO2 = IBUTOLBO2H : 	KRO2HO2*0.625 	;
{1034.} 	 IBUTOLBO2 + NO3 = IBUTOLBO + NO2 : 	KRO2NO3 	;
{1035.} 	 IBUTOLCO2 = IBUTOLOHC : 	1.30D-12*0.2*RO2 	;
{1036.} 	 IBUTOLCO2 = HOIPRCHO : 	1.30D-12*0.2*RO2 	;
{1037.} 	 IBUTOLCO2 = IBUTOLCO : 	1.30D-12*0.6*RO2 	;
{1038.} 	 IBUTOLCO2 + NO = IBUTOLCNO3 : 	KRO2NO*0.041 	;
{1039.} 	 IBUTOLCO2 + NO = IBUTOLCO + NO2 : 	KRO2NO*0.959 	;
{1040.} 	 IBUTOLCO2 + HO2 = IBUTOLCO2H : 	KRO2HO2*0.625 	;
{1041.} 	 IBUTOLCO2 + NO3 = IBUTOLCO + NO2 : 	KRO2NO3 	;
{1042.} 	 IBUTALBO2 + NO = IBUALANO3 : 	KRO2NO*0.033 	;
{1043.} 	 IBUTALBO2 = IBUTALBO : 	1.30D-12*0.6*RO2 	;
{1044.} 	 IBUTALBO2 = IBUTDIAL : 	1.30D-12*0.2*RO2 	;
{1045.} 	 IBUTALBO2 = HOIPRCHO : 	1.30D-12*0.2*RO2 	;
{1046.} 	 IBUTALBO2 + NO = IBUTALBO + NO2 : 	KRO2NO*0.967 	;
{1047.} 	 IBUTALBO2 + HO2 = IBUTALBO2H : 	KRO2HO2*0.625 	;
{1048.} 	 IBUTALBO2 + NO3 = IBUTALBO + NO2 : 	KRO2NO3 	;
{1049.} 	 IBUTALCO2 = IBUTALOH : 	9.20D-14*0.3*RO2 	;
{1050.} 	 IBUTALCO2 = M2PROPAL2O : 	9.20D-14*0.7*RO2 	;
{1051.} 	 IBUTALCO2 + HO2 = IBUTALO2H : 	KRO2HO2*0.625 	;
{1052.} 	 IBUTALCO2 + NO = M2PROPAL2O + NO2 : 	KRO2NO 	;
{1053.} 	 IBUTALCO2 + NO3 = M2PROPAL2O + NO2 : 	KRO2NO3 	;
{1054.} 	 IPRCO3 = IC3H7O2 : 	1.00D-11*0.7*RO2 	;
{1055.} 	 IPRCO3 = IBUTACID : 	1.00D-11*0.3*RO2 	;
{1056.} 	 IPRCO3 + NO2 = PIPN : 	KFPAN 	;
{1057.} 	 IPRCO3 + HO2 = PERIBUACID : 	KAPHO2*0.71 	;
{1058.} 	 IPRCO3 + NO = IC3H7O2 + NO2 : 	KAPNO 	;
{1059.} 	 IPRCO3 + HO2 = IBUTACID + O3 : 	KAPHO2*0.29 	;
{1060.} 	 IPRCO3 + NO3 = IC3H7O2 + NO2 : 	KRO2NO3*1.60 	;
{1061.} 	 TBUTOLO2 + NO = TBUTOLNO3 : 	KRO2NO*0.017 	;
{1062.} 	 TBUTOLO2 = TBUTOLO : 	2.00D-13*0.6*RO2 	;
{1063.} 	 TBUTOLO2 = IBUTALOH : 	2.00D-13*0.2*RO2 	;
{1064.} 	 TBUTOLO2 = IBUTOLOHB : 	2.00D-13*0.2*RO2 	;
{1065.} 	 TBUTOLO2 + HO2 = TBUTOLOOH : 	5.60D-14*EXP(1650/TEMP) 	;
{1066.} 	 TBUTOLO2 + NO = TBUTOLO + NO2 : 	KRO2NO*0.983 	;
{1067.} 	 TBUTOLO2 + NO3 = NO2 + TBUTOLO : 	KRO2NO3 	;
{1068.} 	 C4CHOBO2 + NO = C4CHOBNO3 : 	KRO2NO*0.129 	;
{1069.} 	 C4CHOBO2 = C4CHOBO : 	2.00D-12*0.6*RO2 	;
{1070.} 	 C4CHOBO2 = CO3C4CHO : 	2.00D-12*0.2*RO2 	;
{1071.} 	 C4CHOBO2 = HO3C4CHO : 	2.00D-12*0.2*RO2 	;
{1072.} 	 C4CHOBO2 + NO = C4CHOBO + NO2 : 	KRO2NO*0.871 	;
{1073.} 	 C4CHOBO2 + HO2 = C4CHOBOOH : 	KRO2HO2*0.706 	;
{1074.} 	 C4CHOBO2 + NO3 = C4CHOBO + NO2 : 	KRO2NO3 	;
{1075.} 	 C4H9CO3 = NC4H9O2 : 	1.00D-11*0.7*RO2 	;
{1076.} 	 C4H9CO3 = PENTACID : 	1.00D-11*0.3*RO2 	;
{1077.} 	 C4H9CO3 + HO2 = PENTACID + O3 : 	KAPHO2*0.29 	;
{1078.} 	 C4H9CO3 + HO2 = PERPENACID : 	KAPHO2*0.71 	;
{1079.} 	 C4H9CO3 + NO2 = PPEN : 	KFPAN 	;
{1080.} 	 C4H9CO3 + NO = NC4H9O2 + NO2 : 	KAPNO 	;
{1081.} 	 C4H9CO3 + NO3 = NC4H9O2 + NO2 : 	KRO2NO3*1.60 	;
{1082.} 	 HO1C5O2 + NO = HO1C5NO3 : 	KRO2NO*0.052 	;
{1083.} 	 HO1C5O2 = HO1C5O : 	2.50D-13*0.6*RO2 	;
{1084.} 	 HO1C5O2 = CO2C5OH : 	2.50D-13*0.2*RO2 	;
{1085.} 	 HO1C5O2 = HO2C5OH : 	2.50D-13*0.2*RO2 	;
{1086.} 	 HO1C5O2 + NO = HO1C5O + NO2 : 	KRO2NO*0.948 	;
{1087.} 	 HO1C5O2 + HO2 = HO1C5OOH : 	KRO2HO2*0.706 	;
{1088.} 	 HO1C5O2 + NO3 = HO1C5O + NO2 : 	KRO2NO3 	;
{1089.} 	 MPRKAO2 = MPRKAO : 	8.80D-13*0.6*RO2 	;
{1090.} 	 MPRKAO2 = CO23C5 : 	8.80D-13*0.2*RO2 	;
{1091.} 	 MPRKAO2 = MPRKAOH : 	8.80D-13*0.2*RO2 	;
{1092.} 	 MPRKAO2 + NO = MPRKAO + NO2 : 	KRO2NO 	;
{1093.} 	 MPRKAO2 + HO2 = MPRKAOOH : 	KRO2HO2*0.706 	;
{1094.} 	 MPRKAO2 + NO3 = MPRKAO + NO2 : 	KRO2NO3 	;
{1095.} 	 CO2C54O2 = CO2C54O : 	8.80D-13*0.6*RO2 	;
{1096.} 	 CO2C54O2 = CO24C5 : 	8.80D-13*0.2*RO2 	;
{1097.} 	 CO2C54O2 = HO2CO4C5 : 	8.80D-13*0.2*RO2 	;
{1098.} 	 CO2C54O2 + NO = MPRKNO3 : 	KRO2NO*0.129 	;
{1099.} 	 CO2C54O2 + HO2 = MPRKBOOH : 	KRO2HO2*0.706 	;
{1100.} 	 CO2C54O2 + NO = CO2C54O + NO2 : 	KRO2NO*0.871 	;
{1101.} 	 CO2C54O2 + NO3 = CO2C54O + NO2 : 	KRO2NO3 	;
{1102.} 	 HO2C5O2 + NO = HO2C5NO3 : 	KRO2NO*0.021 	;
{1103.} 	 HO2C5O2 = HO2C5O : 	1.30D-12*0.6*RO2 	;
{1104.} 	 HO2C5O2 = HO2C4CHO : 	1.30D-12*0.2*RO2 	;
{1105.} 	 HO2C5O2 = HO2C5OH : 	1.30D-12*0.2*RO2 	;
{1106.} 	 HO2C5O2 + NO = HO2C5O + NO2 : 	KRO2NO*0.979 	;
{1107.} 	 HO2C5O2 + HO2 = HO2C5OOH : 	KRO2HO2*0.706 	;
{1108.} 	 HO2C5O2 + NO3 = HO2C5O + NO2 : 	KRO2NO3 	;
{1109.} 	 DIEKAO2 = DIEKAOH : 	8.80D-13*0.2*RO2 	;
{1110.} 	 DIEKAO2 = CO23C5 : 	8.80D-13*0.2*RO2 	;
{1111.} 	 DIEKAO2 = DIEKAO : 	8.80D-13*0.6*RO2 	;
{1112.} 	 DIEKAO2 + HO2 = DIEKAOOH : 	KRO2HO2*0.706 	;
{1113.} 	 DIEKAO2 + NO = DIEKAO + NO2 : 	KRO2NO 	;
{1114.} 	 DIEKAO2 + NO3 = DIEKAO + NO2 : 	KRO2NO3 	;
{1115.} 	 DIEKBO2 + NO = DIEKBNO3 : 	KRO2NO*0.052 	;
{1116.} 	 DIEKBO2 = DIEKBO : 	2.00D-12*0.6*RO2 	;
{1117.} 	 DIEKBO2 = CO3C4CHO : 	2.00D-12*0.2*RO2 	;
{1118.} 	 DIEKBO2 = HO1CO3C5 : 	2.00D-12*0.2*RO2 	;
{1119.} 	 DIEKBO2 + HO2 = DIEKBOOH : 	KRO2HO2*0.706 	;
{1120.} 	 DIEKBO2 + NO = DIEKBO + NO2 : 	KRO2NO*0.948 	;
{1121.} 	 DIEKBO2 + NO3 = DIEKBO + NO2 : 	KRO2NO3 	;
{1122.} 	 PE2ENEBO2 = C523OH : 	8.80D-13*0.2*RO2 	;
{1123.} 	 PE2ENEBO2 = MPRKAOH : 	8.80D-13*0.2*RO2 	;
{1124.} 	 PE2ENEBO2 = PE2ENEBO : 	8.80D-13*0.6*RO2 	;
{1125.} 	 PE2ENEBO2 + NO = PE2ENEBNO3 : 	KRO2NO*0.064 	;
{1126.} 	 PE2ENEBO2 + NO = PE2ENEBO + NO2 : 	KRO2NO*0.936 	;
{1127.} 	 PE2ENEBO2 + HO2 = C53OH2OOH : 	KRO2HO2*0.706 	;
{1128.} 	 PE2ENEBO2 + NO3 = PE2ENEBO + NO2 : 	KRO2NO3 	;
{1129.} 	 HO3C5O2 = HO13C5 : 	1.30D-12*0.2*RO2 	;
{1130.} 	 HO3C5O2 = HO3C4CHO : 	1.30D-12*0.2*RO2 	;
{1131.} 	 HO3C5O2 = HO3C5O : 	1.30D-12*0.6*RO2 	;
{1132.} 	 HO3C5O2 + NO = HO3C5NO3 : 	KRO2NO*0.052 	;
{1133.} 	 HO3C5O2 + HO2 = HO3C5OOH : 	KRO2HO2*0.706 	;
{1134.} 	 HO3C5O2 + NO = HO3C5O + NO2 : 	KRO2NO*0.948 	;
{1135.} 	 HO3C5O2 + NO3 = HO3C5O + NO2 : 	KRO2NO3 	;
{1136.} 	 M2BUOL2O2 + NO = M2BUOL2NO3 : 	KRO2NO*0.019 	;
{1137.} 	 M2BUOL2O2 = M2BUOL2O : 	9.20D-14*0.7*RO2 	;
{1138.} 	 M2BUOL2O2 = M2BUOL2OH : 	9.20D-14*0.3*RO2 	;
{1139.} 	 M2BUOL2O2 + NO = M2BUOL2O + NO2 : 	KRO2NO*0.981 	;
{1140.} 	 M2BUOL2O2 + HO2 = M2BUOL2OOH : 	KRO2HO2*0.706 	;
{1141.} 	 M2BUOL2O2 + NO3 = M2BUOL2O + NO2 : 	KRO2NO3 	;
{1142.} 	 HM2C43O2 + NO = HM2C43NO3 : 	KRO2NO*0.129 	;
{1143.} 	 HM2C43O2 = HO13M2C4 : 	1.30D-12*0.2*RO2 	;
{1144.} 	 HM2C43O2 = MIPKBOH : 	1.30D-12*0.2*RO2 	;
{1145.} 	 HM2C43O2 = HM2C43O : 	1.30D-12*0.6*RO2 	;
{1146.} 	 HM2C43O2 + HO2 = HM2C43OOH : 	KRO2HO2*0.706 	;
{1147.} 	 HM2C43O2 + NO = HM2C43O + NO2 : 	KRO2NO*0.871 	;
{1148.} 	 HM2C43O2 + NO3 = HM2C43O + NO2 : 	KRO2NO3 	;
{1149.} 	 BUT2CO3 = BUT2CO2H : 	1.00D-11*0.3*RO2 	;
{1150.} 	 BUT2CO3 = SC4H9O2 : 	1.00D-11*0.7*RO2 	;
{1151.} 	 BUT2CO3 + NO2 = C5PAN4 : 	KFPAN 	;
{1152.} 	 BUT2CO3 + HO2 = BUT2CO3H : 	KAPHO2*0.71 	;
{1153.} 	 BUT2CO3 + HO2 = BUT2CO2H + O3 : 	KAPHO2*0.29 	;
{1154.} 	 BUT2CO3 + NO = SC4H9O2 + NO2 : 	KAPNO 	;
{1155.} 	 BUT2CO3 + NO3 = SC4H9O2 + NO2 : 	KRO2NO3*1.60 	;
{1156.} 	 C52O2 + NO = C52NO3 : 	KRO2NO*0.021 	;
{1157.} 	 C52O2 = C52O : 	1.30D-12*0.6*RO2 	;
{1158.} 	 C52O2 = HOIBUTCHO : 	1.30D-12*0.2*RO2 	;
{1159.} 	 C52O2 = C52OH : 	1.30D-12*0.2*RO2 	;
{1160.} 	 C52O2 + NO = C52O + NO2 : 	KRO2NO*0.979 	;
{1161.} 	 C52O2 + HO2 = C52OOH : 	KRO2HO2*0.706 	;
{1162.} 	 C52O2 + NO3 = C52O + NO2 : 	KRO2NO3 	;
{1163.} 	 ME2BUOLO2 + NO = ME2BUOLNO3 : 	KRO2NO*0.019 	;
{1164.} 	 ME2BUOLO2 = ME2BUOLO : 	9.20D-14*0.7*RO2 	;
{1165.} 	 ME2BUOLO2 = C4ME3HO23 : 	9.20D-14*0.3*RO2 	;
{1166.} 	 ME2BUOLO2 + NO = ME2BUOLO + NO2 : 	KRO2NO*0.981 	;
{1167.} 	 ME2BUOLO2 + HO2 = ME2BUOLOOH : 	KRO2HO2*0.706 	;
{1168.} 	 ME2BUOLO2 + NO3 = ME2BUOLO + NO2 : 	KRO2NO3 	;
{1169.} 	 H2M3C4O2 = HO13M2C4 : 	1.30D-12*0.2*RO2 	;
{1170.} 	 H2M3C4O2 = HO2C43CHO : 	1.30D-12*0.2*RO2 	;
{1171.} 	 H2M3C4O2 = H2M3C4O : 	1.30D-12*0.6*RO2 	;
{1172.} 	 H2M3C4O2 + NO = H2M3C4NO3 : 	KRO2NO*0.033 	;
{1173.} 	 H2M3C4O2 + HO2 = H2M3C4OOH : 	KRO2HO2*0.706 	;
{1174.} 	 H2M3C4O2 + NO = H2M3C4O + NO2 : 	KRO2NO*0.967 	;
{1175.} 	 H2M3C4O2 + NO3 = H2M3C4O + NO2 : 	KRO2NO3 	;
{1176.} 	 MIPKAO2 = MIPKAOH : 	9.20D-14*0.3*RO2 	;
{1177.} 	 MIPKAO2 = MIPKAO : 	9.20D-14*0.7*RO2 	;
{1178.} 	 MIPKAO2 + HO2 = MIPKAOOH : 	KRO2HO2*0.706 	;
{1179.} 	 MIPKAO2 + NO = MIPKAO + NO2 : 	KRO2NO 	;
{1180.} 	 MIPKAO2 + NO3 = MIPKAO + NO2 : 	KRO2NO3 	;
{1181.} 	 MIPKBO2 = MIPKBO : 	1.30D-12*0.6*RO2 	;
{1182.} 	 MIPKBO2 = CO2C43CHO : 	1.30D-12*0.2*RO2 	;
{1183.} 	 MIPKBO2 = MIPKBOH : 	1.30D-12*0.2*RO2 	;
{1184.} 	 MIPKBO2 + NO = MIPKBNO3 : 	KRO2NO*0.052 	;
{1185.} 	 MIPKBO2 + HO2 = MIPKBOOH : 	KRO2HO2*0.706 	;
{1186.} 	 MIPKBO2 + NO = MIPKBO + NO2 : 	KRO2NO*0.948 	;
{1187.} 	 MIPKBO2 + NO3 = MIPKBO + NO2 : 	KRO2NO3 	;
{1188.} 	 ME2BU2OLO2 = C4ME3HO23 : 	8.80D-13*0.20*RO2 	;
{1189.} 	 ME2BU2OLO2 = MIPKAOH : 	8.80D-13*0.20*RO2 	;
{1190.} 	 ME2BU2OLO2 = ME2BU2OLO : 	8.80D-13*0.60*RO2 	;
{1191.} 	 ME2BU2OLO2 + NO = M2BU2OLNO3 : 	KRO2NO*0.062 	;
{1192.} 	 ME2BU2OLO2 + HO2 = M2BU2OLOOH : 	KRO2HO2*0.706 	;
{1193.} 	 ME2BU2OLO2 + NO = ME2BU2OLO + NO2 : 	KRO2NO*0.938 	;
{1194.} 	 ME2BU2OLO2 + NO3 = ME2BU2OLO + NO2 : 	KRO2NO3 	;
{1195.} 	 PROL11MO2 = M2BUOL2OH : 	2.00D-12*0.2*RO2 	;
{1196.} 	 PROL11MO2 = PROL1MCHO : 	2.00D-12*0.2*RO2 	;
{1197.} 	 PROL11MO2 = PROL11MO : 	2.00D-12*0.6*RO2 	;
{1198.} 	 PROL11MO2 + NO = PROL11MNO3 : 	KRO2NO*0.024 	;
{1199.} 	 PROL11MO2 + NO = PROL11MO + NO2 : 	KRO2NO*0.976 	;
{1200.} 	 PROL11MO2 + HO2 = PROL11MOOH : 	KRO2HO2*0.706 	;
{1201.} 	 PROL11MO2 + NO3 = PROL11MO + NO2 : 	KRO2NO3 	;
{1202.} 	 HO2M2C4O2 = HO2M2C4OH : 	1.30D-12*0.2*RO2 	;
{1203.} 	 HO2M2C4O2 = H2M2C3CHO : 	1.30D-12*0.2*RO2 	;
{1204.} 	 HO2M2C4O2 = HO2M2C4O : 	1.30D-12*0.6*RO2 	;
{1205.} 	 HO2M2C4O2 + NO = HO2M2C4NO3 : 	KRO2NO*0.052 	;
{1206.} 	 HO2M2C4O2 + HO2 = HO2M2C4OOH : 	KRO2HO2*0.706 	;
{1207.} 	 HO2M2C4O2 + NO = HO2M2C4O + NO2 : 	KRO2NO*0.948 	;
{1208.} 	 HO2M2C4O2 + NO3 = HO2M2C4O + NO2 : 	KRO2NO3 	;
{1209.} 	 C5H11CO3 = PEAO2 : 	1.00D-11*RO2 	;
{1210.} 	 C5H11CO3 + NO2 = PHXN : 	KFPAN 	;
{1211.} 	 C5H11CO3 + NO = PEAO2 + NO2 : 	KAPNO 	;
{1212.} 	 C5H11CO3 + HO2 = C5H11CO3H : 	KAPHO2 	;
{1213.} 	 C5H11CO3 + NO3 = PEAO2 + NO2 : 	KRO2NO3*1.60 	;
{1214.} 	 HO1C6O2 + NO = HO1C6NO3 : 	KRO2NO*0.078 	;
{1215.} 	 HO1C6O2 = HO1C6O : 	2.50D-13*0.6*RO2 	;
{1216.} 	 HO1C6O2 = HO1CO4C6 : 	2.50D-13*0.2*RO2 	;
{1217.} 	 HO1C6O2 = HO14C6 : 	2.50D-13*0.2*RO2 	;
{1218.} 	 HO1C6O2 + NO = HO1C6O + NO2 : 	KRO2NO*0.922 	;
{1219.} 	 HO1C6O2 + HO2 = HO1C6OOH : 	KRO2HO2*0.770 	;
{1220.} 	 HO1C6O2 + NO3 = HO1C6O + NO2 : 	KRO2NO3 	;
{1221.} 	 HEX2ONAO2 + NO = HEX2ONANO3 : 	KRO2NO*0.195 	;
{1222.} 	 HEX2ONAO2 = HEX2ONAO : 	8.80D-13*0.6*RO2 	;
{1223.} 	 HEX2ONAO2 = CO24C6 : 	8.80D-13*0.2*RO2 	;
{1224.} 	 HEX2ONAO2 = CO2HO4C6 : 	8.80D-13*0.2*RO2 	;
{1225.} 	 HEX2ONAO2 + NO = HEX2ONAO + NO2 : 	KRO2NO*0.805 	;
{1226.} 	 HEX2ONAO2 + HO2 = HEX2ONAOOH : 	KRO2HO2*0.770 	;
{1227.} 	 HEX2ONAO2 + NO3 = HEX2ONAO + NO2 : 	KRO2NO3 	;
{1228.} 	 HEX2ONBO2 + NO = HEX2ONBNO3 : 	KRO2NO*0.195 	;
{1229.} 	 HEX2ONBO2 = HEX2ONBO : 	2.50D-13*0.6*RO2 	;
{1230.} 	 HEX2ONBO2 = CO25C6 : 	2.50D-13*0.2*RO2 	;
{1231.} 	 HEX2ONBO2 = HO2CO5C6 : 	2.50D-13*0.2*RO2 	;
{1232.} 	 HEX2ONBO2 + NO = HEX2ONBO + NO2 : 	KRO2NO*0.805 	;
{1233.} 	 HEX2ONBO2 + HO2 = HEX2ONBOOH : 	KRO2HO2*0.770 	;
{1234.} 	 HEX2ONBO2 + NO3 = HEX2ONBO + NO2 : 	KRO2NO3 	;
{1235.} 	 HEX2ONCO2 = HEX2ONCO : 	8.80D-13*0.6*RO2 	;
{1236.} 	 HEX2ONCO2 = CO23C6 : 	8.80D-13*0.2*RO2 	;
{1237.} 	 HEX2ONCO2 = CO2HO3C6 : 	8.80D-13*0.2*RO2 	;
{1238.} 	 HEX2ONCO2 + NO = HEX2ONCO + NO2 : 	KRO2NO 	;
{1239.} 	 HEX2ONCO2 + HO2 = HEX2ONCOOH : 	KRO2HO2*0.770 	;
{1240.} 	 HEX2ONCO2 + NO3 = HEX2ONCO + NO2 : 	KRO2NO3 	;
{1241.} 	 HO2C6O2 + NO = HO2C6NO3 : 	KRO2NO*0.078 	;
{1242.} 	 HO2C6O2 = HO2C6O : 	2.50D-13*0.6*RO2 	;
{1243.} 	 HO2C6O2 = HO2CO5C6 : 	2.50D-13*0.2*RO2 	;
{1244.} 	 HO2C6O2 = HO25C6 : 	2.50D-13*0.2*RO2 	;
{1245.} 	 HO2C6O2 + NO = HO2C6O + NO2 : 	KRO2NO*0.922 	;
{1246.} 	 HO2C6O2 + HO2 = HO2C6OOH : 	KRO2HO2*0.770 	;
{1247.} 	 HO2C6O2 + NO3 = HO2C6O + NO2 : 	KRO2NO3 	;
{1248.} 	 HO3C6O2 + NO = HO3C6NO3 : 	KRO2NO*0.031 	;
{1249.} 	 HO3C6O2 = HO3C6O : 	1.30D-12*0.6*RO2 	;
{1250.} 	 HO3C6O2 = HO3C5CHO : 	1.30D-12*0.2*RO2 	;
{1251.} 	 HO3C6O2 = HO14C6 : 	1.30D-12*0.2*RO2 	;
{1252.} 	 HO3C6O2 + NO = HO3C6O + NO2 : 	KRO2NO*0.969 	;
{1253.} 	 HO3C6O2 + HO2 = HO3C6OOH : 	KRO2HO2*0.770 	;
{1254.} 	 HO3C6O2 + NO3 = HO3C6O + NO2 : 	KRO2NO3 	;
{1255.} 	 HEX3ONDO2 + NO = HEX3ONDNO3 : 	KRO2NO*0.078 	;
{1256.} 	 HEX3ONDO2 = HEX3ONDO : 	2.50D-13*0.6*RO2 	;
{1257.} 	 HEX3ONDO2 = C3COCCHO : 	2.50D-13*0.2*RO2 	;
{1258.} 	 HEX3ONDO2 = HEX3ONDOH : 	2.50D-13*0.2*RO2 	;
{1259.} 	 HEX3ONDO2 + NO = HEX3ONDO + NO2 : 	KRO2NO*0.922 	;
{1260.} 	 HEX3ONDO2 + HO2 = HEX3ONDOOH : 	KRO2HO2*0.770 	;
{1261.} 	 HEX3ONDO2 + NO3 = HEX3ONDO + NO2 : 	KRO2NO3 	;
{1262.} 	 HEX3ONCO2 = HEX3ONCO : 	2.50D-13*0.6*RO2 	;
{1263.} 	 HEX3ONCO2 = CO23C6 : 	2.50D-13*0.2*RO2 	;
{1264.} 	 HEX3ONCO2 = HEX3ONCOH : 	2.50D-13*0.2*RO2 	;
{1265.} 	 HEX3ONCO2 + NO = HEX3ONCO + NO2 : 	KRO2NO 	;
{1266.} 	 HEX3ONCO2 + HO2 = HEX3ONCOOH : 	KRO2HO2*0.770 	;
{1267.} 	 HEX3ONCO2 + NO3 = HEX3ONCO + NO2 : 	KRO2NO3 	;
{1268.} 	 HEX3ONBO2 = HEX3ONBO : 	2.50D-13*0.6*RO2 	;
{1269.} 	 HEX3ONBO2 = C6CO34 : 	2.50D-13*0.2*RO2 	;
{1270.} 	 HEX3ONBO2 = C6CO3HO4 : 	2.50D-13*0.2*RO2 	;
{1271.} 	 HEX3ONBO2 + NO = HEX3ONBO + NO2 : 	KRO2NO 	;
{1272.} 	 HEX3ONBO2 + HO2 = HEX3ONBOOH : 	KRO2HO2*0.770 	;
{1273.} 	 HEX3ONBO2 + NO3 = HEX3ONBO + NO2 : 	KRO2NO3 	;
{1274.} 	 HEX3ONAO2 + NO = HEX3ONANO3 : 	KRO2NO*0.195 	;
{1275.} 	 HEX3ONAO2 = HEX3ONAO : 	2.50D-13*0.6*RO2 	;
{1276.} 	 HEX3ONAO2 = CO24C6 : 	2.50D-13*0.2*RO2 	;
{1277.} 	 HEX3ONAO2 = HEX3ONAOH : 	2.50D-13*0.2*RO2 	;
{1278.} 	 HEX3ONAO2 + NO = HEX3ONAO + NO2 : 	KRO2NO*0.805 	;
{1279.} 	 HEX3ONAO2 + HO2 = HEX3ONAOOH : 	KRO2HO2*0.770 	;
{1280.} 	 HEX3ONAO2 + NO3 = HEX3ONAO + NO2 : 	KRO2NO3 	;
{1281.} 	 HOCH2CO3 = HOCH2CO2H : 	1.00D-11*0.3*RO2 	;
{1282.} 	 HOCH2CO3 + NO2 = PHAN : 	KFPAN 	;
{1283.} 	 HOCH2CO3 + HO2 = HOCH2CO3H : 	KAPHO2*0.71 	;
{1284.} 	 HOCH2CO3 + HO2 = HOCH2CO2H + O3 : 	KAPHO2*0.29 	;
{1285.} 	 HOCH2CO3 = HCHO + HO2 : 	1.00D-11*0.7*RO2 	;
{1286.} 	 HOCH2CO3 + NO = NO2 + HO2 + HCHO : 	KAPNO 	;
{1287.} 	 HOCH2CO3 + NO3 = NO2 + HO2 + HCHO : 	KRO2NO3*1.60 	;
{1288.} 	 NO3CH2CO3 = NO3CH2CO2H : 	1.00D-11*0.3*RO2 	;
{1289.} 	 NO3CH2CO3 = HCHO + NO2 : 	1.00D-11*0.7*RO2 	;
{1290.} 	 NO3CH2CO3 + HO2 = NO3CH2CO2H + O3 : 	KAPHO2*0.29 	;
{1291.} 	 NO3CH2CO3 + HO2 = NO3CH2CO3H : 	KAPHO2*0.71 	;
{1292.} 	 NO3CH2CO3 + NO2 = NO3CH2PAN : 	KFPAN 	;
{1293.} 	 NO3CH2CO3 + NO3 = HCHO + NO2 + NO2 : 	KRO2NO3*1.60 	;
{1294.} 	 NO3CH2CO3 + NO = HCHO + NO2 + NO2 : 	KAPNO 	;
{1295.} 	 HCOCH2O = HCHO + CO + HO2 : 	KDEC 	;
{1296.} 	 CH3CHOHCO3 = CH3CHO + HO2 : 	1.00D-11*RO2 	;
{1297.} 	 CH3CHOHCO3 + HO2 = IPROPOLPER : 	KAPHO2 	;
{1298.} 	 CH3CHOHCO3 + NO2 = IPROPOLPAN : 	KFPAN 	;
{1299.} 	 CH3CHOHCO3 + NO = CH3CHO + HO2 + NO2 : 	KAPNO 	;
{1300.} 	 CH3CHOHCO3 + NO3 = CH3CHO + HO2 + NO2 : 	KRO2NO3*1.60 	;
{1301.} 	 PRNO3CO3 = PRNO3CO2H : 	1.00D-11*0.3*RO2 	;
{1302.} 	 PRNO3CO3 + NO2 = PRNO3PAN : 	KFPAN 	;
{1303.} 	 PRNO3CO3 + HO2 = PRNO3CO3H : 	KAPHO2*0.71 	;
{1304.} 	 PRNO3CO3 + HO2 = PRNO3CO2H + O3 : 	KAPHO2*0.29 	;
{1305.} 	 PRNO3CO3 = CH3CHO + NO2 : 	1.00D-11*0.7*RO2 	;
{1306.} 	 PRNO3CO3 + NO3 = CH3CHO + NO2 + NO2 : 	KRO2NO3*1.60 	;
{1307.} 	 PRNO3CO3 + NO = CH3CHO + NO2 + NO2 : 	KAPNO 	;
{1308.} 	 PROPALO = CH3CHO + HO2 + CO : 	KDEC 	;
{1309.} 	 OH + EGLYOX = C2H5CO3 + CO : 	1.39D-11 	;
{1310.} 	 EGLYOX = C2H5CO3 + CO + HO2 : 	J(34) 	;
{1311.} 	 NO3 + EGLYOX = C2H5CO3 + CO + HNO3 : 	KNO3AL*4.0 	;
{1312.} 	 HO3C3CO3 + NO2 = HO3C3PAN : 	KFPAN 	;
{1313.} 	 HO3C3CO3 + HO2 = HO3C3CO3H : 	KAPHO2 	;
{1314.} 	 HO3C3CO3 = C2H5CHO + HO2 : 	1.00D-11*RO2 	;
{1315.} 	 HO3C3CO3 + NO = C2H5CHO + HO2 + NO2 : 	KAPNO 	;
{1316.} 	 HO3C3CO3 + NO3 = C2H5CHO + HO2 + NO2 : 	KRO2NO3*1.60 	;
{1317.} 	 CO3C4NO3O2 = CO3C4NO3O : 	2.50D-13*0.6*RO2 	;
{1318.} 	 CO3C4NO3O2 = CO23C4NO3 : 	2.50D-13*0.2*RO2 	;
{1319.} 	 CO3C4NO3O2 = CO3C4NO3OH : 	2.50D-13*0.2*RO2 	;
{1320.} 	 CO3C4NO3O2 + NO = CO3C4NO3O + NO2 : 	KRO2NO 	;
{1321.} 	 CO3C4NO3O2 + HO2 = COC4NO3OOH : 	KRO2HO2*0.625 	;
{1322.} 	 CO3C4NO3O2 + NO3 = CO3C4NO3O + NO2 : 	KRO2NO3 	;
{1323.} 	 MEKCO = C2H5CO3 + HCHO : 	KDEC 	;
{1324.} 	 BUTAL2O = C2H5CHO + HO2 + CO : 	KDEC 	;
{1325.} 	 PROPACID + OH = C2H5O2 : 	1.16D-12 	;
{1326.} 	 PPN = C2H5CO3 + NO2 : 	KBPAN 	;
{1327.} 	 PPN + OH = CH3CHO + CO + NO2 : 	1.27D-12 	;
{1328.} 	 PERPROACID = C2H5O2 + OH : 	J(41) 	;
{1329.} 	 PERPROACID + OH = C2H5CO3 : 	4.42D-12 	;
{1330.} 	 OH + HCOCO2H = CO + HO2 : 	1.23D-11 	;
{1331.} 	 HCOCO2H = HO2 + HO2 + CO : 	J(34) 	;
{1332.} 	 OH + HCOCO3H = HCOCO3 : 	1.58D-11 	;
{1333.} 	 HCOCO3H = HO2 + CO + OH : 	J(41)+J(15) 	;
{1334.} 	 OH + GLYPAN = CO + CO + NO2 : 	1.22D-11 	;
{1335.} 	 GLYPAN = HCOCO3 + NO2 : 	KBPAN 	;
{1336.} 	 BZFUONE + OH = BZFUO2 : 	4.45D-11 	;
{1337.} 	 BZFUONE + O3 = BZFUONOOA : 	2.20D-19 	;
{1338.} 	 BZFUONE + NO3 = NBZFUO2 : 	3.00D-13 	;
{1339.} 	 MALDIALCO3 = MALDIALCO2 : 	1.00D-11*0.70*RO2 	;
{1340.} 	 MALDIALCO3 = MALDALCO2H : 	1.00D-11*0.30*RO2 	;
{1341.} 	 MALDIALCO3 + HO2 = MALDALCO2H + O3 : 	KAPHO2*0.29 	;
{1342.} 	 MALDIALCO3 + HO2 = MALDALCO3H : 	KAPHO2*0.71 	;
{1343.} 	 MALDIALCO3 + NO = MALDIALCO2 + NO2 : 	KAPNO 	;
{1344.} 	 MALDIALCO3 + NO2 = MALDIALPAN : 	KFPAN 	;
{1345.} 	 MALDIALCO3 + NO3 = MALDIALCO2 + NO2 : 	KRO2NO3*1.60 	;
{1346.} 	 BZEMUCNO3 + OH = BZEMUCCO + NO2 : 	4.38D-11 	;
{1347.} 	 BZEMUCNO3 = EPXC4DIAL + NO2 + GLYOX + HO2 : 	J(17) 	;
{1348.} 	 BZEMUCO = C3DIALO2 + C32OH13CO : 	KDEC*0.5 	;
{1349.} 	 BZEMUCO = EPXC4DIAL + GLYOX + HO2 : 	KDEC*0.5 	;
{1350.} 	 BZEMUCOH = BZEMUCO + HO2 : 	J(15)*2 	;
{1351.} 	 BZEMUCOH + OH = BZEMUCCO + HO2 : 	8.23D-11 	;
{1352.} 	 BZEMUCCO = HCOCOHCO3 + C3DIALO2 : 	J(15)*2+J(22) 	;
{1353.} 	 BZEMUCCO + OH = EPXDLCO3 + GLYOX : 	9.20D-11 	;
{1354.} 	 BZEMUCOOH = BZEMUCO + OH : 	J(41)+J(15)*2 	;
{1355.} 	 BZEMUCOOH + OH = BZEMUCCO + OH : 	1.31D-10 	;
{1356.} 	 BZEMUCCO2H + OH = C5DIALO2 : 	4.06D-11 	;
{1357.} 	 BZEMUCCO2H = C5DIALO2 + HO2 : 	J(18)+J(19) 	;
{1358.} 	 BZEMUCPAN = BZEMUCCO3 + NO2 : 	KBPAN 	;
{1359.} 	 BZEMUCPAN + OH = MALDIAL + CO + NO2 : 	4.05D-11 	;
{1360.} 	 BZEMUCCO3H = C5DIALO2 + OH : 	J(41)+J(18)+J(19) 	;
{1361.} 	 BZEMUCCO3H + OH = BZEMUCCO3 : 	4.37D-11 	;
{1362.} 	 EPXDLCO3 = EPXDLCO2H : 	1.00D-11*RO2*0.3 	;
{1363.} 	 EPXDLCO3 = C3DIALO2 : 	1.00D-11*RO2*0.7 	;
{1364.} 	 EPXDLCO3 + HO2 = EPXDLCO2H + O3 : 	KAPHO2*0.29 	;
{1365.} 	 EPXDLCO3 + HO2 = EPXDLCO3H : 	KAPHO2*0.71 	;
{1366.} 	 EPXDLCO3 + NO2 = EPXDLPAN : 	KFPAN 	;
{1367.} 	 EPXDLCO3 + NO = C3DIALO2 + NO2 : 	KAPNO 	;
{1368.} 	 EPXDLCO3 + NO3 = C3DIALO2 + NO2 : 	KRO2NO3*1.60 	;
{1369.} 	 C3DIALO2 = C33CO : 	8.80D-13*RO2*0.2 	;
{1370.} 	 C3DIALO2 = C32OH13CO : 	8.80D-13*RO2*0.2 	;
{1371.} 	 C3DIALO2 = C3DIALO : 	8.80D-13*RO2*0.6 	;
{1372.} 	 C3DIALO2 + HO2 = C3DIALOOH : 	KRO2HO2*0.520 	;
{1373.} 	 C3DIALO2 + NO = C3DIALO + NO2 : 	KRO2NO 	;
{1374.} 	 C3DIALO2 + NO3 = C3DIALO + NO2 : 	KRO2NO3 	;
{1375.} 	 GLYOO + CO = GLYOX : 	1.2D-15 	;
{1376.} 	 GLYOO = HCOCO2H : 	1.0D-17*H2O 	;
{1377.} 	 GLYOO + NO = GLYOX + NO2 : 	1.0D-14 	;
{1378.} 	 GLYOO = GLYOX + H2O2 : 	6.0D-18*H2O 	;
{1379.} 	 GLYOO + SO2 = GLYOX + SO3 : 	7.0D-14 	;
{1380.} 	 GLYOO + NO2 = GLYOX + NO3 : 	1.0D-15 	;
{1381.} 	 C5DIALCO + OH = MALDIALCO3 + CO : 	4.90D-11 	;
{1382.} 	 C5DIALCO = MALDIALCO3 + CO + HO2 : 	J(34)+J(18)+J(19) 	;
{1383.} 	 C5DIALOH + OH = C5DIALCO + HO2 : 	7.75D-11 	;
{1384.} 	 C5DIALOH = MALDIAL + CO + HO2 + HO2 : 	J(18)+J(19) 	;
{1385.} 	 C5DIALO = MALDIAL + CO + HO2 : 	KDEC 	;
{1386.} 	 C5DIALOOH = C5DIALO + OH : 	J(41) 	;
{1387.} 	 C5DIALOOH + OH = C5DIALCO + OH : 	7.52D-11 	;
{1388.} 	 C5DIALOOH = MALDIAL + CO + HO2 + OH : 	J(18)+J(19) 	;
{1389.} 	 MALDIALO2 = MALDIALO : 	8.80D-13*0.60*RO2 	;
{1390.} 	 MALDIALO2 = HOCOC4DIAL : 	8.80D-13*0.20*RO2 	;
{1391.} 	 MALDIALO2 = HOHOC4DIAL : 	8.80D-13*0.20*RO2 	;
{1392.} 	 MALDIALO2 + NO = MALDIALO + NO2 : 	KRO2NO 	;
{1393.} 	 MALDIALO2 + HO2 = MALDIALOOH : 	KRO2HO2*0.625 	;
{1394.} 	 MALDIALO2 + NO3 = MALDIALO + NO2 : 	KRO2NO3 	;
{1395.} 	 C6H5O2 = C6H5O : 	2.50D-13*RO2 	;
{1396.} 	 C6H5O2 + NO = C6H5O + NO2 : 	KRO2NO 	;
{1397.} 	 C6H5O2 + HO2 = C6H5OOH : 	KRO2HO2*0.770 	;
{1398.} 	 C6H5O2 + NO3 = C6H5O + NO2 : 	KRO2NO3 	;
{1399.} 	 HOC6H4NO2 + OH = NPHEN1O : 	9.00D-13 	;
{1400.} 	 HOC6H4NO2 + NO3 = NPHEN1O + HNO3 : 	9.00D-14 	;
{1401.} 	 PHENO = PBZQONE + HO2 : 	KDEC*0.29 	;
{1402.} 	 PHENO = MALDALCO2H + GLYOX + HO2 : 	KDEC*0.71 	;
{1403.} 	 PHENOH + OH = PHENO : 	1.13D-10 	;
{1404.} 	 PHENOOH = PHENO + OH : 	J(41) 	;
{1405.} 	 PHENOOH + OH = PHENO2 : 	1.16D-10 	;
{1406.} 	 CATEC1O + O3 = CATEC1O2 : 	2.86D-13 	;
{1407.} 	 CATEC1O + NO2 = NCATECHOL : 	2.08D-12 	;
{1408.} 	 NPHENO = MALDALCO2H + GLYOX + NO2 : 	KDEC 	;
{1409.} 	 NPHENOH + OH = NPHENO : 	1.04D-10 	;
{1410.} 	 NPHENOH = MALDALCO2H + GLYOX + HO2 + NO2 : 	J(54) 	;
{1411.} 	 NPHENOOH = NPHENO + OH : 	J(41) 	;
{1412.} 	 NPHENOOH + OH = NPHENO2 : 	1.07D-10 	;
{1413.} 	 NPHENOOH = MALDALCO2H + GLYOX + OH + NO2 : 	J(54) 	;
{1414.} 	 C6H5CO3 = PHCOOH : 	1.00D-11*RO2*0.3 	;
{1415.} 	 C6H5CO3 = C6H5O2 : 	1.00D-11*RO2*0.7 	;
{1416.} 	 C6H5CO3 + NO = C6H5O2 + NO2 : 	KAPNO 	;
{1417.} 	 C6H5CO3 + NO2 = PBZN : 	KFPAN 	;
{1418.} 	 C6H5CO3 + HO2 = C6H5CO3H : 	KAPHO2*0.71 	;
{1419.} 	 C6H5CO3 + HO2 = PHCOOH + O3 : 	KAPHO2*0.29 	;
{1420.} 	 C6H5CO3 + NO3 = C6H5O2 + NO2 : 	KRO2NO3*1.60 	;
{1421.} 	 TLFUONE + OH = TLFUO2 : 	6.90D-11 	;
{1422.} 	 TLFUONE + O3 = TLFUONOOA : 	8.00D-19 	;
{1423.} 	 TLFUONE + NO3 = NTLFUO2 : 	1.00D-12 	;
{1424.} 	 C5DICARB = TLFUONE : 	J(4)*0.2*0.4 	;
{1425.} 	 C5DICARB + OH = C5DICARBO2 : 	5.58D-11*0.52 	;
{1426.} 	 C5DICARB + OH = C5CO14O2 : 	5.58D-11*0.48 	;
{1427.} 	 C5DICARB + O3 = GLYOX + MGLOOB : 	2.00D-18*0.5 	;
{1428.} 	 C5DICARB = C5CO14O2 + HO2 : 	J(4)*0.2*0.6 	;
{1429.} 	 C5DICARB + O3 = MGLYOX + GLYOOA : 	2.00D-18*0.5 	;
{1430.} 	 C5DICARB + NO3 = C5CO14O2 + HNO3 : 	KNO3AL*2.75 	;
{1431.} 	 C4MDIAL + OH = MC3CODBCO3 : 	4.41D-11*0.385 	;
{1432.} 	 C4MDIAL = PXYFUONE : 	J(4)*0.2*0.4 	;
{1433.} 	 C4MDIAL + OH = C4M2ALOHO2 : 	4.41D-11*0.23 	;
{1434.} 	 C4MDIAL + OH = C3MCODBCO3 : 	4.41D-11*0.385 	;
{1435.} 	 C4MDIAL = C3MCODBCO3 + HO2 + CO : 	J(4)*0.2*0.3 	;
{1436.} 	 C4MDIAL = MC3CODBCO3 + HO2 + CO : 	J(4)*0.2*0.3 	;
{1437.} 	 C4MDIAL + O3 = MGLYOX + GLYOOC : 	5.00D-18*0.50 	;
{1438.} 	 C4MDIAL + O3 = MGLYOOA + GLYOX : 	5.00D-18*0.50 	;
{1439.} 	 C4MDIAL + NO3 = MC3CODBCO3 + HNO3 : 	KNO3AL*4.25 	;
{1440.} 	 C4MDIAL + NO3 = C3MCODBCO3 + HNO3 : 	KNO3AL*4.25 	;
{1441.} 	 C5CO14O2 = C5CO14OH : 	1.00D-11*0.30*RO2 	;
{1442.} 	 C5CO14O2 = C5CO14CO2 : 	1.00D-11*0.70*RO2 	;
{1443.} 	 C5CO14O2 + NO2 = C5COO2NO2 : 	KFPAN 	;
{1444.} 	 C5CO14O2 + HO2 = C5CO14OH + O3 : 	KAPHO2*0.29 	;
{1445.} 	 C5CO14O2 + HO2 = C5CO14OOH : 	KAPHO2*0.71 	;
{1446.} 	 C5CO14O2 + NO = C5CO14CO2 + NO2 : 	KAPNO 	;
{1447.} 	 C5CO14O2 + NO3 = C5CO14CO2 + NO2 : 	KRO2NO3*1.60 	;
{1448.} 	 TLEMUCNO3 + OH = TLEMUCCO + NO2 : 	3.06D-11 	;
{1449.} 	 TLEMUCNO3 = EPXC4DIAL + NO2 + CH3CO3 + CO + HO2 : 	J(17)+J(22) 	;
{1450.} 	 TLEMUCO = C3DIALO2 + CO2H3CHO : 	KDEC*0.50 	;
{1451.} 	 TLEMUCO = EPXC4DIAL + MGLYOX + HO2 : 	KDEC*0.50 	;
{1452.} 	 TLEMUCOH = TLEMUCO + HO2 : 	J(17)+J(22) 	;
{1453.} 	 TLEMUCOH + OH = TLEMUCCO + HO2 : 	6.17D-11 	;
{1454.} 	 TLEMUCCO + OH = CH3CO3 + EPXC4DIAL + CO : 	4.06D-11 	;
{1455.} 	 TLEMUCCO = CH3CO3 + EPXC4DIAL + CO + HO2 : 	J(17)+J(35) 	;
{1456.} 	 TLEMUCOOH = TLEMUCO + OH : 	J(41)+J(17)+J(22) 	;
{1457.} 	 TLEMUCOOH + OH = TLEMUCCO + OH : 	7.04D-11 	;
{1458.} 	 TLEMUCCO2H + OH = C615CO2O2 : 	5.98D-11 	;
{1459.} 	 TLEMUCCO2H = C615CO2O2 + HO2 : 	J(18)+J(19) 	;
{1460.} 	 TLEMUCPAN = TLEMUCCO3 + NO2 : 	KBPAN 	;
{1461.} 	 TLEMUCPAN + OH = C5DICARB + CO + NO2 : 	5.96D-11 	;
{1462.} 	 TLEMUCCO3H = C615CO2O2 + OH : 	J(41)+J(18)+J(19) 	;
{1463.} 	 TLEMUCCO3H + OH = TLEMUCCO3 : 	6.29D-11 	;
{1464.} 	 C6125CO + OH = C5CO14O2 + CO : 	6.45D-11 	;
{1465.} 	 C6125CO = C5CO14O2 + CO + HO2 : 	J(34)+J(23)+J(24) 	;
{1466.} 	 C615CO2OH + OH = C6125CO + HO2 : 	1.18D-10 	;
{1467.} 	 C615CO2OH = C5DICARB + CO + HO2 + HO2 : 	J(23)+J(24) 	;
{1468.} 	 C615CO2O = C5DICARB + CO + HO2 : 	KDEC 	;
{1469.} 	 C615CO2OOH = C615CO2O + OH : 	J(41) 	;
{1470.} 	 C615CO2OOH + OH = C6125CO + OH : 	9.42D-11 	;
{1471.} 	 C615CO2OOH = C5DICARB + CO + HO2 + OH : 	J(23)+J(24) 	;
{1472.} 	 MGLOO + CO = MGLYOX : 	1.2D-15 	;
{1473.} 	 MGLOO = CH3COCO2H : 	1.0D-17*H2O 	;
{1474.} 	 MGLOO + NO = MGLYOX + NO2 : 	1.0D-14 	;
{1475.} 	 MGLOO = MGLYOX + H2O2 : 	6.0D-18*H2O 	;
{1476.} 	 MGLOO + SO2 = MGLYOX + SO3 : 	7.0D-14 	;
{1477.} 	 MGLOO + NO2 = MGLYOX + NO3 : 	1.0D-15 	;
{1478.} 	 OXYL1O2 = TOL1O : 	2.50D-13*RO2 	;
{1479.} 	 OXYL1O2 + NO = TOL1O + NO2 : 	KRO2NO 	;
{1480.} 	 OXYL1O2 + HO2 = OXYL1OOH : 	KRO2HO2*0.820 	;
{1481.} 	 OXYL1O2 + NO3 = TOL1O + NO2 : 	KRO2NO3 	;
{1482.} 	 TOL1OHNO2 + OH = NCRES1O : 	1.53D-12 	;
{1483.} 	 TOL1OHNO2 + NO3 = NCRES1O + HNO3 : 	3.13D-13*1.0 	;
{1484.} 	 CRESO = PTLQONE + HO2 : 	KDEC*0.32 	;
{1485.} 	 CRESO = C5CO14OH + GLYOX + HO2 : 	KDEC*0.68 	;
{1486.} 	 CRESOH + OH = CRESO : 	1.11D-10 	;
{1487.} 	 CRESOOH = CRESO + OH : 	J(41) 	;
{1488.} 	 CRESOOH + OH = CRESO2 : 	1.15D-10 	;
{1489.} 	 MCATEC1O + O3 = MCATEC1O2 : 	2.86D-13 	;
{1490.} 	 MCATEC1O + NO2 = MNCATECH : 	2.08D-12 	;
{1491.} 	 NCRESO = C5CO14OH + GLYOX + NO2 : 	KDEC 	;
{1492.} 	 NCRESOH + OH = NCRESO : 	1.04D-10 	;
{1493.} 	 NCRESOH = CRESO + HO2 + NO2 : 	J(54) 	;
{1494.} 	 NCRESOOH = NCRESO + OH : 	J(41) 	;
{1495.} 	 NCRESOOH + OH = NCRESO2 : 	1.07D-10 	;
{1496.} 	 NCRESOOH = CRESO + OH + NO2 : 	J(54) 	;
{1497.} 	 C58O2 + NO = C58NO3 : 	KRO2NO*0.019 	;
{1498.} 	 C58O2 = C58O : 	9.20D-14*0.7*RO2 	;
{1499.} 	 C58O2 = C58OH : 	9.20D-14*0.3*RO2 	;
{1500.} 	 C58O2 + NO = C58O + NO2 : 	KRO2NO*0.981 	;
{1501.} 	 C58O2 + HO2 = C58OOH : 	KRO2HO2*0.706 	;
{1502.} 	 C58O2 + NO3 = C58O + NO2 : 	KRO2NO3 	;
{1503.} 	 HC4ACO3 = HC4ACO2H : 	1.00D-11*0.3*RO2 	;
{1504.} 	 HC4ACO3 = ACETOL + HO2 + CO : 	1.00D-11*0.7*RO2 	;
{1505.} 	 HC4ACO3 + HO2 = HC4ACO2H + O3 : 	KAPHO2*0.29 	;
{1506.} 	 HC4ACO3 + HO2 = HC4ACO3H : 	KAPHO2*0.71 	;
{1507.} 	 HC4ACO3 + NO2 = C5PAN17 : 	KFPAN 	;
{1508.} 	 HC4ACO3 + NO = ACETOL + CO + HO2 + NO2 : 	KAPNO 	;
{1509.} 	 HC4ACO3 + NO3 = ACETOL + CO + HO2 + NO2 : 	KRO2NO3*1.60 	;
{1510.} 	 GLYOOC = GLYOO : 	KDEC*0.11 	;
{1511.} 	 GLYOOC = OH + HO2 + CO + CO : 	KDEC*0.89 	;
{1512.} 	 ACLOOA = ACLOO : 	KDEC*0.11 	;
{1513.} 	 ACLOOA = OH + HO2 + MGLYOX : 	KDEC*0.89 	;
{1514.} 	 MVKOH + OH = MVKOHBO2 : 	4.60D-12*EXP(452/TEMP)*0.7 	;
{1515.} 	 MVKOH + OH = MVKOHAO2 : 	4.60D-12*EXP(452/TEMP)*0.3 	;
{1516.} 	 MVKOH = ALLYLOH + CO : 	J(23) 	;
{1517.} 	 MVKOH + O3 = HOCH2COCHO + CH2OOB : 	7.51D-16*EXP(-1521/TEMP)*0.5 	;
{1518.} 	 MVKOH + O3 = HMGLOOA + HCHO : 	7.51D-16*EXP(-1521/TEMP)*0.5 	;
{1519.} 	 MVKOH = HCHO + HO2 + HOCH2CO3 + CO : 	J(24) 	;
{1520.} 	 HC4CCO3 = HC4CCO2H : 	1.00D-11*0.3*RO2 	;
{1521.} 	 HC4CCO3 = CH3CO3 + HOCH2CHO : 	1.00D-11*0.7*RO2 	;
{1522.} 	 HC4CCO3 + HO2 = HC4CCO2H + O3 : 	KAPHO2*0.29 	;
{1523.} 	 HC4CCO3 + HO2 = HC4CCO3H : 	KAPHO2*0.71 	;
{1524.} 	 HC4CCO3 + NO2 = C5PAN19 : 	KFPAN 	;
{1525.} 	 HC4CCO3 + NO = CH3CO3 + HOCH2CHO + NO2 : 	KAPNO 	;
{1526.} 	 HC4CCO3 + NO3 = CH3CO3 + HOCH2CHO + NO2 : 	KRO2NO3*1.60 	;
{1527.} 	 C57O2 = C57O : 	9.20D-14*0.7*RO2 	;
{1528.} 	 C57O2 = C57OH : 	9.20D-14*0.3*RO2 	;
{1529.} 	 C57O2 + NO = C57O + NO2 : 	KRO2NO 	;
{1530.} 	 C57O2 + HO2 = C57OOH : 	KRO2HO2*0.706 	;
{1531.} 	 C57O2 + NO3 = C57O + NO2 : 	KRO2NO3 	;
{1532.} 	 GAOOB = GAOO : 	KDEC*0.11 	;
{1533.} 	 GAOOB = OH + HO2 + CO + HCHO : 	KDEC*0.89 	;
{1534.} 	 MGLYOOA = MGLYOO : 	KDEC*0.11 	;
{1535.} 	 MGLYOOA = OH + CO + CH3CO3 : 	KDEC*0.89 	;
{1536.} 	 C59O2 = C59O : 	9.20D-14*RO2 	;
{1537.} 	 C59O2 + NO = C59O + NO2 : 	KRO2NO 	;
{1538.} 	 C59O2 + HO2 = C59OOH : 	KRO2HO2*0.706 	;
{1539.} 	 C59O2 + NO3 = C59O + NO2 : 	KRO2NO3 	;
{1540.} 	 NC4CO3 = NC4CO2H : 	1.00D-11*0.3*RO2 	;
{1541.} 	 NC4CO3 + NO2 = C5PAN18 : 	KFPAN 	;
{1542.} 	 NC4CO3 + HO2 = NC4CO3H : 	KAPHO2*0.71 	;
{1543.} 	 NC4CO3 + HO2 = NC4CO2H + O3 : 	KAPHO2*0.29 	;
{1544.} 	 NC4CO3 = NOA + HO2 + CO : 	1.00D-11*0.7*RO2 	;
{1545.} 	 NC4CO3 + NO = NOA + CO + HO2 + NO2 : 	KAPNO 	;
{1546.} 	 NC4CO3 + NO3 = NOA + CO + HO2 + NO2 : 	KRO2NO3*1.60 	;
{1547.} 	 C510O2 = C510O : 	9.20D-14*0.7*RO2 	;
{1548.} 	 C510O2 = C510OH : 	9.20D-14*0.3*RO2 	;
{1549.} 	 C510O2 + NO = C510O + NO2 : 	KRO2NO 	;
{1550.} 	 C510O2 + HO2 = C510OOH : 	KRO2HO2*0.706 	;
{1551.} 	 C510O2 + NO3 = C510O + NO2 : 	KRO2NO3 	;
{1552.} 	 NOAOOA = NOAOO : 	KDEC*0.11 	;
{1553.} 	 NOAOOA = OH + NO2 + MGLYOX : 	KDEC*0.89 	;
{1554.} 	 OH + CO2H3CHO = CO2H3CO3 : 	2.45D-11 	;
{1555.} 	 NO3 + CO2H3CHO = CO2H3CO3 + HNO3 : 	KNO3AL*4.0 	;
{1556.} 	 CO2H3CHO = MGLYOX + CO + HO2 + HO2 : 	J(15) 	;
{1557.} 	 OH + HO12CO3C4 = BIACETOH + HO2 : 	1.88D-11 	;
{1558.} 	 HO12CO3C4 = CH3CO3 + HOCH2CHO + HO2 : 	J(22) 	;
{1559.} 	 HMVKAO = MGLYOX + HCHO + HO2 : 	KDEC 	;
{1560.} 	 OH + HMVKANO3 = CO2H3CHO + NO2 : 	2.23D-12 	;
{1561.} 	 OH + HMVKAOOH = CO2H3CHO + OH : 	5.77D-11 	;
{1562.} 	 HMVKAOOH = HMVKAO + OH : 	J(41) 	;
{1563.} 	 BIACETOH = CH3CO3 + HOCH2CO3 : 	J(35) 	;
{1564.} 	 OH + BIACETOH = CO23C3CHO + HO2 : 	2.69D-12 	;
{1565.} 	 HMVKBO = CH3CO3 + HOCH2CHO : 	KDEC 	;
{1566.} 	 OH + HMVKBOOH = BIACETOH + OH : 	3.95D-11 	;
{1567.} 	 HMVKBOOH = HMVKBO + OH : 	J(41) 	;
{1568.} 	 MVKO = HCHO + ACO3 : 	KDEC 	;
{1569.} 	 OH + VGLYOX = CO + ACO3 : 	2.95D-11 	;
{1570.} 	 VGLYOX = HO2 + CO + ACO3 : 	J(34) 	;
{1571.} 	 NO3 + VGLYOX = CO + ACO3 + HNO3 : 	KNO3AL*2.0 	;
{1572.} 	 MVKOOH = MVKO + OH : 	J(41) 	;
{1573.} 	 OH + MVKOOH = VGLYOX + OH : 	2.55D-11 	;
{1574.} 	 OH + MVKOOH = MVKO2 : 	1.90D-12*EXP(190/TEMP) 	;
{1575.} 	 MVKOOH = HCHO + OH + ACO3 : 	J(24) 	;
{1576.} 	 OH + MACROH = MACRO : 	3.42D-11 	;
{1577.} 	 MACROH = ACETOL + CO + HO2 + HO2 : 	J(17) 	;
{1578.} 	 C3MDIALOH + OH = CHOMOHCO3 : 	1.32D-10 	;
{1579.} 	 C3MDIALOH = MGLYOX + HO2 + CO + HO2 : 	J(17)*2 	;
{1580.} 	 MACROHO = MGLYOX + HCHO + HO2 : 	KDEC 	;
{1581.} 	 MACROHONO3 = MACROHO + NO2 : 	J(55) 	;
{1582.} 	 MACROHONO3 + OH = MACROHO2 + NO2 : 	2.18D-11 	;
{1583.} 	 MACROHONO3 = MGLYOX + CO + HO2 + NO2 : 	J(17) 	;
{1584.} 	 MACROHOOH = MACROHO + OH : 	J(41) 	;
{1585.} 	 MACROHOOH + OH = MACROHO2 : 	5.55D-11 	;
{1586.} 	 MACROHOOH = IBUTALOH + CO + HO2  + OH : 	J(17) 	;
{1587.} 	 MACRO = ACETOL + HCHO + HO2 : 	KDEC 	;
{1588.} 	 MACROOH = MACRO + OH : 	J(41) 	;
{1589.} 	 OH + MACROOH = MACRO2 : 	3.77D-11 	;
{1590.} 	 MACROOH = ACETOL + CO + HO2 + OH : 	J(17) 	;
{1591.} 	 OH + MACO2H = CH3CO3 + HCHO : 	1.51D-11+1.351D-11 	;
{1592.} 	 CH3C2H5O2 = HCHO + CH3CO3 : 	KDEC*0.35 	;
{1593.} 	 CH3C2H5O2 = HCHO + HCHO + CO : 	KDEC*0.65 	;
{1594.} 	 OH + MACO3H = MACO3 : 	1.661D-11 	;
{1595.} 	 MACO3H = CH3CO3 + HCHO + OH : 	J(41) 	;
{1596.} 	 MPAN = MACO3 + NO2 : 	1.6D+16*EXP(-13500/TEMP) 	;
{1597.} 	 OH + MPAN = ACETOL + HCHO + CO + NO2 : 	2.9D-11 	;
{1598.} 	 O3 + MPAN = CH3CHOOB + HCHO + CO + NO2 : 	8.2D-18 	;
{1599.} 	 MGLYOO + CO = MGLYOX : 	1.2D-15 	;
{1600.} 	 MGLYOO + NO = MGLYOX + NO2 : 	1.0D-14 	;
{1601.} 	 MGLYOO = MGLYOX + H2O2 : 	6.0D-18*H2O 	;
{1602.} 	 MGLYOO + SO2 = MGLYOX + SO3 : 	7.0D-14 	;
{1603.} 	 MGLYOO + NO2 = MGLYOX + NO3 : 	1.0D-15 	;
{1604.} 	 MSIA + OH = CH3O2 + SO2 : 	9.00D-11 	;
{1605.} 	 DMSO2O2 = DMSO2O : 	2.00D-12*RO2*0.6 	;
{1606.} 	 DMSO2O2 = CH3SO2CHO : 	2.00D-12*RO2*0.2 	;
{1607.} 	 DMSO2O2 = DMSO2OH : 	2.00D-12*RO2*0.2 	;
{1608.} 	 DMSO2O2 + NO = DMSO2O + NO2 : 	KRO2NO 	;
{1609.} 	 DMSO2O2 + HO2 = DMSO2OOH : 	KRO2HO2*0.387 	;
{1610.} 	 DMSO2O2 + NO3 = DMSO2O + NO2 : 	KRO2NO3 	;
{1611.} 	 CH3S = CH3SOO : 	1.20D-16*EXP(1580/TEMP)*O2 	;
{1612.} 	 CH3S + O3 = CH3SO : 	1.50D-12*EXP(360/TEMP) 	;
{1613.} 	 CH3S + NO2 = CH3SO + NO : 	6.00D-11*EXP(240/TEMP) 	;
{1614.} 	 OH + HOC3H6OH = HOC2H4CHO + HO2 : 	9.73D-12 	;
{1615.} 	 OH + HOC2H4CHO = HOC2H4CO3 : 	3.06D-11 	;
{1616.} 	 HOC2H4CHO = HOCH2CH2O2 + HO2 + CO : 	J(15) 	;
{1617.} 	 NO3 + HOC2H4CHO = HOC2H4CO3 + HNO3 : 	KNO3AL*2.4 	;
{1618.} 	 HO1C3O = HOC2H4CHO + HO2 : 	KROPRIM*O2 	;
{1619.} 	 OH + HO1C3NO3 = HOC2H4CHO + NO2 : 	4.44D-12 	;
{1620.} 	 HO1C3NO3 = HO1C3O + NO2 : 	J(53) 	;
{1621.} 	 OH + HO1C3OOH = HO1C3O2 : 	1.90D-12*EXP(190/TEMP) 	;
{1622.} 	 OH + HO1C3OOH = HOC2H4CHO + OH : 	1.52D-11 	;
{1623.} 	 HO1C3OOH = HO1C3O + OH : 	J(41) 	;
{1624.} 	 NBUTOLBO = CH3CHO + HOCH2CH2O2 : 	2.70D+14*EXP(-7398/TEMP) 	;
{1625.} 	 NBUTOLBO = MEKAOH + HO2 : 	KROSEC*O2 	;
{1626.} 	 MEKAOH = HOCH2CH2O2 + CH3CO3 : 	J(22) 	;
{1627.} 	 MEKAOH + OH = CO2C3CHO + HO2 : 	1.35D-11 	;
{1628.} 	 OH + HO2C4OH = MEKAOH + HO2 : 	1.42D-11 	;
{1629.} 	 NBUTOLBNO3 = NBUTOLBO + NO2 : 	J(54) 	;
{1630.} 	 NBUTOLBNO3 + OH = MEKAOH + NO2 : 	4.51D-12 	;
{1631.} 	 NBUTOLBOOH = NBUTOLBO + OH : 	J(41) 	;
{1632.} 	 NBUTOLBOOH + OH = NBUTOLBO2 : 	1.90D-12*EXP(190/TEMP) 	;
{1633.} 	 NBUTOLBOOH + OH = MEKAOH + OH : 	2.58D-11 	;
{1634.} 	 BUTALNO3 = NO2 + BUTALO : 	J(54)+J(15) 	;
{1635.} 	 BUTALNO3 + OH = CO2C3CHO + NO2 : 	2.25D-11 	;
{1636.} 	 BUTALO = CO2C3CHO + HO2 : 	KROSEC*O2 	;
{1637.} 	 BUTALO = CH3CHO + HCOCH2O2 : 	2.70D+14*EXP(-7398/TEMP) 	;
{1638.} 	 CO2C3CHO + OH = CO2C3CO3 : 	7.15D-11 	;
{1639.} 	 CO2C3CHO = CH3COCH2O2 + HCHO : 	J(15) 	;
{1640.} 	 CO2C3CHO + NO3 = CO2C3CO3 + HNO3 : 	KNO3AL*4.0 	;
{1641.} 	 OH + HO2C3CHO = HO2C3CO3 : 	4.88D-11*0.439 	;
{1642.} 	 HO2C3CHO = HO2 + CO + IPROPOLO2 : 	J(15) 	;
{1643.} 	 OH + HO2C3CHO = CO2C3CHO + HO2 : 	4.88D-11*0.561 	;
{1644.} 	 NO3 + HO2C3CHO = HO2C3CO3 + HNO3 : 	KNO3AL*4.0 	;
{1645.} 	 BUTALO2H = BUTALO + OH : 	J(41) 	;
{1646.} 	 BUTALO2H + OH = BUTALO2 : 	1.90D-12*EXP(190/TEMP) 	;
{1647.} 	 BUTALO2H + OH = CO2C3CHO + OH : 	1.27D-10 	;
{1648.} 	 BUTALO2H = HO2 + CO + IC3H7O2 : 	J(15) 	;
{1649.} 	 BUTACID + OH = NC3H7O2 : 	2.40D-12 	;
{1650.} 	 PBN = C3H7CO3 + NO2 : 	KBPAN 	;
{1651.} 	 PBN + OH = C2H5CHO + CO + NO2 : 	4.70D-12 	;
{1652.} 	 PERBUACID = NC3H7O2 + OH : 	J(41) 	;
{1653.} 	 PERBUACID + OH = C3H7CO3 : 	8.29D-12 	;
{1654.} 	 OH + HO1C4NO3 = HOC3H6CHO + NO2 : 	5.85D-12 	;
{1655.} 	 HO1C4NO3 = HO1C4O + NO2 : 	J(53) 	;
{1656.} 	 HO1C4O = HOC3H6CHO + HO2 : 	8.74D+11*EXP(-3430/TEMP) 	;
{1657.} 	 OH + HOC3H6CHO = HOC3H6CO3 : 	2.64D-11 	;
{1658.} 	 HOC3H6CHO = HO1C3O2 + HO2 + CO : 	J(15) 	;
{1659.} 	 NO3 + HOC3H6CHO = HOC3H6CO3 + HNO3 : 	KNO3AL*4.0 	;
{1660.} 	 OH + HOC4H8OH = HOC3H6CHO + HO2 : 	1.11D-11 	;
{1661.} 	 OH + HO1C4OOH = HO1C4O2 : 	1.90D-12*EXP(190/TEMP) 	;
{1662.} 	 OH + HO1C4OOH = HOC3H6CHO + OH : 	1.66D-11 	;
{1663.} 	 HO1C4OOH = HO1C4O + OH : 	J(41) 	;
{1664.} 	 BUT2OLOH + OH = BUT2OLO + HO2 : 	1.73D-11 	;
{1665.} 	 BUT2OLO + OH = BIACET + HO2 : 	5.86D-12 	;
{1666.} 	 BUT2OLO = CH3CO3 + CH3CHO + HO2 : 	J(22) 	;
{1667.} 	 BUT2OLAO = CH3CHO + CH3CHO + HO2 : 	2.00D+14*EXP(-4714/TEMP) 	;
{1668.} 	 BUT2OLNO3 + OH = BUT2OLO + NO2 : 	1.79D-12 	;
{1669.} 	 BUT2OLOOH + OH = BUT2OLO + OH : 	2.89D-11 	;
{1670.} 	 BUT2OLOOH = BUT2OLAO + OH : 	J(41) 	;
{1671.} 	 BUT2OLOOH + OH = BUT2OLO2 : 	1.90D-12*EXP(190/TEMP) 	;
{1672.} 	 MEKANO3 + OH = CO2C3CHO + NO2 : 	9.64D-13 	;
{1673.} 	 MEKANO3 = MEKAO + NO2 : 	J(53)+J(22) 	;
{1674.} 	 MEKAO = HO1CO3C4O2 : 	1.30D+11*EXP(-4127/TEMP) 	;
{1675.} 	 MEKAO = CO2C3CHO + HO2 : 	KROPRIM*O2 	;
{1676.} 	 MEKAOOH = MEKAO + OH : 	J(41)+J(22) 	;
{1677.} 	 MEKAOOH + OH = MEKAO2 : 	1.90D-12*EXP(190/TEMP) 	;
{1678.} 	 MEKAOOH + OH = CO2C3CHO + OH : 	4.88D-11 	;
{1679.} 	 MEKCOOH = MEKCO + OH : 	J(41) 	;
{1680.} 	 MEKCOOH + OH = MEKCO2 : 	1.90D-12*EXP(190/TEMP) 	;
{1681.} 	 MEKCOOH + OH = EGLYOX + OH : 	9.55D-12 	;
{1682.} 	 MEKCOOH = C2H5CO3 + HCHO + OH : 	J(22) 	;
{1683.} 	 OH + BIACET = BIACETO2 : 	1.40D-18*TEMP**2*EXP(194/TEMP) 	;
{1684.} 	 BIACET = CH3CO3 + CH3CO3 : 	J(35) 	;
{1685.} 	 MEKBO = CH3CHO + CH3CO3 : 	KDEC 	;
{1686.} 	 MEKBOOH = MEKBO + OH : 	J(41) 	;
{1687.} 	 MEKBOOH + OH = MEKBO2 : 	1.90D-12*EXP(190/TEMP) 	;
{1688.} 	 MEKBOOH + OH = BIACET + OH : 	1.88D-11 	;
{1689.} 	 MEKBOOH = CH3CO3 + CH3CHO + OH : 	J(22) 	;
{1690.} 	 IBUTOLOHB + OH = IBUTALOH + HO2 : 	4.64D-12 	;
{1691.} 	 IBUTOLBO = CH3COCH3 + HCHO + HO2 : 	2.00D+14*EXP(-5902/TEMP) 	;
{1692.} 	 IBUTOLBNO3 + OH = CH3COCH3 + HCHO + NO2 : 	8.48D-13 	;
{1693.} 	 IBUTOLBO2H = IBUTOLBO + OH : 	J(41) 	;
{1694.} 	 IBUTOLBO2H + OH = IBUTOLBO2 : 	8.10D-12 	;
{1695.} 	 IBUTOLOHC + OH = HOIPRCHO : 	1.14D-11 	;
{1696.} 	 OH + HOIPRCHO = HOIPRCO3 : 	3.60D-11 	;
{1697.} 	 HOIPRCHO = HYPROPO2 + CO + HO2 : 	J(17) 	;
{1698.} 	 NO3 + HOIPRCHO = HOIPRCO3 + HNO3 : 	KNO3AL*4.0 	;
{1699.} 	 IBUTOLCO = HOIPRCHO + HO2 : 	KROPRIM*O2 	;
{1700.} 	 IBUTOLCNO3 = IBUTOLCO + NO2 : 	J(53) 	;
{1701.} 	 IBUTOLCNO3 + OH = HOIPRCHO + NO2 : 	4.85D-12 	;
{1702.} 	 IBUTOLCO2H = IBUTOLCO + OH : 	J(41) 	;
{1703.} 	 IBUTOLCO2H + OH = IBUTOLCO2 : 	1.90D-12*EXP(190/TEMP) 	;
{1704.} 	 IBUTOLCO2H + OH = HOIPRCHO + OH : 	1.69D-11 	;
{1705.} 	 IBUALANO3 + OH = IBUTDIAL + NO2 : 	2.25D-11 	;
{1706.} 	 IBUALANO3 = IBUTALBO + NO2 : 	J(53)+J(17) 	;
{1707.} 	 IBUTALBO = IBUTDIAL + HO2 : 	KROPRIM*O2 	;
{1708.} 	 IBUTDIAL + OH = IBUDIALCO3 : 	1.44D-10 	;
{1709.} 	 IBUTDIAL = PROPALO2 + HO2 + CO : 	J(17)*2.0 	;
{1710.} 	 IBUTDIAL + NO3 = IBUDIALCO3 + HNO3 : 	2*KNO3AL*4.0 	;
{1711.} 	 IBUTALBO2H = IBUTALBO + OH : 	J(41)+J(17) 	;
{1712.} 	 IBUTALBO2H + OH = IBUTALBO2 : 	1.90D-12*EXP(190/TEMP) 	;
{1713.} 	 IBUTALBO2H + OH = IBUTDIAL + OH : 	7.11D-11 	;
{1714.} 	 IBUTALOH + OH = IPRHOCO3 : 	2.20D-11 	;
{1715.} 	 IBUTALOH = CH3COCH3 + HO2 + HO2 + CO : 	J(17) 	;
{1716.} 	 M2PROPAL2O = CH3COCH3 + HO2 + CO : 	KDEC 	;
{1717.} 	 IBUTALO2H = M2PROPAL2O + OH : 	J(41) 	;
{1718.} 	 IBUTALO2H + OH = IBUTALCO2 : 	2.57D-11 	;
{1719.} 	 IBUTALO2H = CH3COCH3 + OH + HO2 + CO : 	J(17) 	;
{1720.} 	 IBUTACID + OH = IC3H7O2 : 	2.00D-12 	;
{1721.} 	 PIPN = IPRCO3 + NO2 : 	KBPAN 	;
{1722.} 	 PIPN + OH = CH3COCH3 + CO + NO2 : 	2.66D-12 	;
{1723.} 	 PERIBUACID = IC3H7O2 + OH : 	J(41) 	;
{1724.} 	 PERIBUACID + OH = IPRCO3 : 	6.26D-12 	;
{1725.} 	 TBUTOLNO3 + OH = IBUTALOH + NO2 : 	5.21D-13 	;
{1726.} 	 TBUTOLO = CH3COCH3 + HCHO + HO2 : 	2.00D+14*EXP(-4909/TEMP) 	;
{1727.} 	 TBUTOLOOH = TBUTOLO + OH : 	J(41) 	;
{1728.} 	 TBUTOLOOH + OH = TBUTOLO2 : 	1.90D-12*EXP(190/TEMP) 	;
{1729.} 	 TBUTOLOOH + OH = IBUTALOH + OH : 	9.98D-12 	;
{1730.} 	 C4CHOBNO3 + OH = CO3C4CHO + NO2 : 	2.33D-11 	;
{1731.} 	 C4CHOBNO3 = C4CHOBO + NO2 : 	J(54)+J(15) 	;
{1732.} 	 C4CHOBO = CO3C4CHO + HO2 : 	KROPRIM*O2 	;
{1733.} 	 OH + CO3C4CHO = CO3C4CO3 : 	6.76D-11 	;
{1734.} 	 CO3C4CHO = MEKCO2 + HO2 + CO : 	J(15) 	;
{1735.} 	 NO3 + CO3C4CHO = CO3C4CO3 + HNO3 : 	KNO3AL*5.5 	;
{1736.} 	 OH + HO3C4CHO = HO3C4CO3 : 	5.56D-11*0.389 	;
{1737.} 	 HO3C4CHO = HO3C4O2 + HO2 + CO : 	J(15) 	;
{1738.} 	 OH + HO3C4CHO = CO3C4CHO + HO2 : 	5.56D-11*0.611 	;
{1739.} 	 NO3 + HO3C4CHO = HO3C4CO3 + HNO3 : 	KNO3AL*5.5 	;
{1740.} 	 C4CHOBOOH + OH = C4CHOBO2 : 	1.90D-12*EXP(190/TEMP) 	;
{1741.} 	 C4CHOBOOH + OH = CO3C4CHO + OH : 	1.57D-10 	;
{1742.} 	 C4CHOBOOH = C4CHOBO + OH : 	J(41)+J(15) 	;
{1743.} 	 PENTACID + OH = NC4H9O2 : 	6.88D-12 	;
{1744.} 	 PERPENACID + OH = C4H9CO3 : 	1.04D-11 	;
{1745.} 	 PERPENACID = NC4H9O2 + OH : 	J(41) 	;
{1746.} 	 PPEN = C4H9CO3 + NO2 : 	KBPAN 	;
{1747.} 	 PPEN + OH = C3H7CHO + CO + NO2 : 	6.85D-12 	;
{1748.} 	 OH + HO1C5NO3 = CO2C5OH + NO2 : 	5.93D-12 	;
{1749.} 	 HO1C5NO3 = HO1C5O + NO2 : 	J(53) 	;
{1750.} 	 HO1C5O = HO2C4CHO + HO2 : 	8.74D+11*EXP(-3430/TEMP) 	;
{1751.} 	 OH + CO2C5OH = C51O2 : 	9.70D-12*0.517 	;
{1752.} 	 CO2C5OH = CH3CO3 + HO1C3O2 : 	J(22) 	;
{1753.} 	 OH + CO2C5OH = CO2C4CHO + HO2 : 	9.60D-12*0.483 	;
{1754.} 	 OH + HO2C5OH = CO2C5OH + HO2 : 	1.54D-11 	;
{1755.} 	 OH + HO1C5OOH = CO2C5OH + OH : 	3.08D-11 	;
{1756.} 	 HO1C5OOH = HO1C5O + OH : 	J(41) 	;
{1757.} 	 MPRKAO = C2H5CHO + CH3CO3 : 	KDEC 	;
{1758.} 	 CO23C5 + OH = CO23C54O2 : 	1.38D-12 	;
{1759.} 	 CO23C5 = CH3CO3 + C2H5CO3 : 	J(35) 	;
{1760.} 	 MPRKAOH + OH = CO23C5 + HO2 : 	1.00D-11 	;
{1761.} 	 MPRKAOH = C2H5CHO + CH3CO3 + HO2 : 	J(22) 	;
{1762.} 	 MPRKAOOH = MPRKAO + OH : 	J(41) 	;
{1763.} 	 MPRKAOOH + OH = MPRKAO2 : 	1.90D-12*EXP(190/TEMP) 	;
{1764.} 	 MPRKAOOH + OH = CO23C5 + OH : 	1.06D-10 	;
{1765.} 	 MPRKAOOH = C2H5CHO + CH3CO3 + OH : 	J(22) 	;
{1766.} 	 CO2C54O = HO2CO4C5O2 : 	1.30D+11*EXP(-4127/TEMP) 	;
{1767.} 	 CO24C5 + OH = CO24C53O2 : 	7.02D-13 	;
{1768.} 	 CO24C5 = CH3COCH2O2 + CH3CO3 : 	J(22) 	;
{1769.} 	 HO2CO4C5 = IPROPOLO2 + CH3CO3 : 	J(22) 	;
{1770.} 	 HO2CO4C5 + OH = CO24C5 + HO2 : 	2.99D-11 	;
{1771.} 	 MPRKNO3 = CO2C54O + NO2 : 	J(54)+J(22) 	;
{1772.} 	 MPRKNO3 + OH = CO24C5 + NO2 : 	1.79D-12 	;
{1773.} 	 MPRKBOOH = CO2C54O + OH : 	J(41) 	;
{1774.} 	 MPRKBOOH + OH = CO2C54O2 : 	1.90D-12*EXP(190/TEMP) 	;
{1775.} 	 MPRKBOOH + OH = CO24C5 + OH : 	1.06D-10 	;
{1776.} 	 MPRKBOOH = IC3H7O2 + CH3CO3 : 	J(22) 	;
{1777.} 	 OH + HO2C5NO3 = HO2C4CHO + NO2 : 	1.03D-11 	;
{1778.} 	 HO2C5NO3 = HO2C5O + NO2 : 	J(54) 	;
{1779.} 	 HO2C5O = CO2C5OH + HO2 : 	4.37D+11*EXP(-2945/TEMP) 	;
{1780.} 	 OH + HO2C4CHO = HO2C4CO3 : 	3.09D-11 	;
{1781.} 	 HO2C4CHO = HO2C4O2 + HO2 + CO : 	J(15) 	;
{1782.} 	 NO3 + HO2C4CHO = HO2C4CO3 + HNO3 : 	KNO3AL*5.5 	;
{1783.} 	 OH + HO2C5OOH = HO2C5O2 : 	1.90D-12*EXP(190/TEMP) 	;
{1784.} 	 OH + HO2C5OOH = HO2C4CHO + OH : 	2.09D-11 	;
{1785.} 	 HO2C5OOH = HO2C5O + OH : 	J(41) 	;
{1786.} 	 DIEKAOH + OH = CO23C5 : 	1.02D-11 	;
{1787.} 	 DIEKAOH = CH3CHO + C2H5CO3 : 	J(22) 	;
{1788.} 	 DIEKAO = CH3CHO + C2H5CO3 : 	KDEC 	;
{1789.} 	 DIEKAOOH + OH = CO23C5 + OH : 	2.00D-11 	;
{1790.} 	 DIEKAOOH + OH = DIEKAO2 : 	1.90D-12*EXP(190/TEMP) 	;
{1791.} 	 DIEKAOOH = DIEKAO + OH : 	J(41) 	;
{1792.} 	 DIEKAOOH = CH3CHO + C2H5CO3 + OH : 	J(22) 	;
{1793.} 	 DIEKBNO3 + OH = CO3C4CHO + NO2 : 	2.13D-12 	;
{1794.} 	 DIEKBNO3 = DIEKBO + NO2 : 	J(22)+J(53) 	;
{1795.} 	 DIEKBO = HOCO3C54O2 : 	8.40D+10*EXP(-2567/TEMP) 	;
{1796.} 	 HO1CO3C5 = C2H5CO3 + HOCH2CH2O2 : 	J(22) 	;
{1797.} 	 HO1CO3C5 + OH = CO3C4CHO + HO2 : 	1.46D-11 	;
{1798.} 	 DIEKBOOH + OH = CO3C4CHO + OH : 	5.36D-11 	;
{1799.} 	 DIEKBOOH + OH = DIEKBO2 : 	1.90D-12*EXP(190/TEMP) 	;
{1800.} 	 DIEKBOOH = DIEKBO + OH : 	J(41)+J(22) 	;
{1801.} 	 C523OH + OH = DIEKAOH + HO2 : 	2.14D-11 	;
{1802.} 	 PE2ENEBO = CH3CHO + C2H5CHO + HO2 : 	2.00D+14*EXP(-4714/TEMP) 	;
{1803.} 	 PE2ENEBNO3 + OH = MPRKAOH + NO2 : 	3.25D-12 	;
{1804.} 	 C53OH2OOH = PE2ENEBO + OH : 	J(41) 	;
{1805.} 	 C53OH2OOH + OH = PE2ENEBO2 : 	1.90D-12*EXP(190/TEMP) 	;
{1806.} 	 C53OH2OOH + OH = MPRKAOH + OH : 	3.19D-11 	;
{1807.} 	 OH + HO13C5 = HO1CO3C5 + HO2 : 	1.61D-11 	;
{1808.} 	 HO3C5O = HO13C5O2 : 	2.03D+11*EXP(-3430/TEMP) 	;
{1809.} 	 OH + HO3C5NO3 = HO3C4CHO + NO2 : 	1.20D-11 	;
{1810.} 	 HO3C5NO3 = HO3C5O + NO2 : 	J(53) 	;
{1811.} 	 OH + HO3C5OOH = HO3C5O2 : 	1.90D-12*EXP(190/TEMP) 	;
{1812.} 	 OH + HO3C5OOH = HO3C4CHO + OH : 	2.28D-11 	;
{1813.} 	 HO3C5OOH = HO3C5O + OH : 	J(41) 	;
{1814.} 	 M2BUOL2NO3 + OH = ACETOL + CH3CHO + NO2 : 	1.18D-12 	;
{1815.} 	 M2BUOL2O = MEK + HCHO + HO2 : 	2.00D+14*EXP(-5902/TEMP) 	;
{1816.} 	 M2BUOL2OH + OH = PROL1MCHO + HO2 : 	5.78D-12 	;
{1817.} 	 M2BUOL2OOH = M2BUOL2O + OH : 	J(41) 	;
{1818.} 	 M2BUOL2OOH + OH = M2BUOL2O2 : 	9.24D-12 	;
{1819.} 	 OH + HM2C43NO3 = MIPKBOH + NO2 : 	4.93D-12 	;
{1820.} 	 HM2C43NO3 = HM2C43O + NO2 : 	J(54) 	;
{1821.} 	 OH + HO13M2C4 = MIPKBOH + HO2 : 	1.59D-11 	;
{1822.} 	 OH + MIPKBOH = CO2C43CHO + HO2 : 	1.51D-11 	;
{1823.} 	 MIPKBOH = CH3CO3 + HYPROPO2 : 	J(22) 	;
{1824.} 	 HM2C43O = MIPKBOH + HO2 : 	KROSEC*O2 	;
{1825.} 	 OH + HM2C43OOH = MIPKBOH + OH : 	3.11D-11 	;
{1826.} 	 HM2C43OOH = HM2C43O + OH : 	J(41) 	;
{1827.} 	 OH + BUT2CO2H = SC4H9O2 : 	6.26D-12 	;
{1828.} 	 C5PAN4 = BUT2CO3 + NO2 : 	KBPAN 	;
{1829.} 	 OH + C5PAN4 = MEK + CO + NO2 : 	2.20D-12 	;
{1830.} 	 BUT2CO3H = SC4H9O2 + OH : 	J(41) 	;
{1831.} 	 OH + BUT2CO3H = BUT2CO3 : 	9.72D-12 	;
{1832.} 	 OH + C52NO3 = HOIBUTCHO + NO2 : 	6.00D-12 	;
{1833.} 	 C52NO3 = C52O + NO2 : 	J(53) 	;
{1834.} 	 C52O = HOBUT2CHO + HO2 : 	8.74D+11*EXP(-3430/TEMP) 	;
{1835.} 	 OH + HOIBUTCHO = HOIBUTCO3 : 	3.51D-11 	;
{1836.} 	 HOIBUTCHO = IBUTOLCO2 + HO2 + CO : 	J(15) 	;
{1837.} 	 NO3 + HOIBUTCHO = HOIBUTCO3 + HNO3 : 	KNO3AL*8.5 	;
{1838.} 	 OH + C52OH = HOBUT2CHO + HO2 : 	1.26D-11*0.5 	;
{1839.} 	 OH + C52OH = HOIBUTCHO + HO2 : 	1.26D-11*0.5 	;
{1840.} 	 OH + C52OOH = C52O2 : 	1.90D-12*EXP(190/TEMP) 	;
{1841.} 	 OH + C52OOH = HOIBUTCHO + OH : 	1.81D-11 	;
{1842.} 	 C52OOH = C52O + OH : 	J(41) 	;
{1843.} 	 ME2BUOLNO3 + OH = CH3CHO + CH3COCH3 + NO2 : 	1.72D-12 	;
{1844.} 	 ME2BUOLO = CH3COCH3 + CH3CHO + HO2 : 	KDEC 	;
{1845.} 	 C4ME3HO23 + OH = MIPKAOH + HO2 : 	8.63D-12 	;
{1846.} 	 ME2BUOLOOH + OH = ME2BUOLO2 : 	1.90D-12*EXP(190/TEMP) 	;
{1847.} 	 ME2BUOLOOH = ME2BUOLO + OH : 	J(41) 	;
{1848.} 	 ME2BUOLOOH + OH = MIPKAOOH + HO2 : 	8.85D-12 	;
{1849.} 	 OH + HO2C43CHO = HO2C43CO3 : 	4.99D-11*0.439 	;
{1850.} 	 HO2C43CHO = BUT2OLO2 + HO2 + CO : 	J(17) 	;
{1851.} 	 OH + HO2C43CHO = CO2C43CHO + HO2 : 	4.99D-11*0.561 	;
{1852.} 	 NO3 + HO2C43CHO = HO2C43CO3 + HNO3 : 	KNO3AL*8.5 	;
{1853.} 	 H2M3C4O = C56O2 : 	2.03D+11*EXP(-4240/TEMP) 	;
{1854.} 	 H2M3C4O = HO2C43CHO + HO2 : 	KROPRIM*O2 	;
{1855.} 	 OH + H2M3C4NO3 = HO2C43CHO + NO2 : 	9.35D-12 	;
{1856.} 	 H2M3C4NO3 = H2M3C4O + NO2 : 	J(53) 	;
{1857.} 	 OH + H2M3C4OOH = HO2C43CHO + OH : 	2.14D-11 	;
{1858.} 	 OH + H2M3C4OOH = H2M3C4O2 : 	1.90D-12*EXP(190/TEMP) 	;
{1859.} 	 H2M3C4OOH = H2M3C4O + OH : 	J(41) 	;
{1860.} 	 OH + MIPKAOH = MIPKAO : 	1.38D-12 	;
{1861.} 	 MIPKAO = CH3COCH3 + CH3CO3 : 	KDEC 	;
{1862.} 	 OH + MIPKAOOH = MIPKAO2 : 	4.98D-12 	;
{1863.} 	 MIPKAOOH = MIPKAO + OH : 	J(41)+J(22) 	;
{1864.} 	 MIPKBO = C53O2 : 	1.30D+11*EXP(-4127/TEMP) 	;
{1865.} 	 MIPKBO = CO2C43CHO + HO2 : 	KROPRIM*O2 	;
{1866.} 	 OH + CO2C43CHO = C41CO3 : 	2.26D-11 	;
{1867.} 	 CO2C43CHO = MEKBO2 + HO2 + CO : 	J(17) 	;
{1868.} 	 NO3 + CO2C43CHO = C41CO3 + HNO3 : 	KNO3AL*8.5 	;
{1869.} 	 OH + MIPKBNO3 = CO2C43CHO + NO2 : 	1.71D-12 	;
{1870.} 	 MIPKBNO3 = MIPKBO + NO2 : 	J(53)+J(22) 	;
{1871.} 	 OH + MIPKBOOH = CO2C43CHO + OH : 	5.41D-11 	;
{1872.} 	 MIPKBOOH = MIPKBO + OH : 	J(41)+J(22) 	;
{1873.} 	 ME2BU2OLO = MIPKAOH + HO2 : 	KROSEC*O2 	;
{1874.} 	 ME2BU2OLO = CH3COCH3 + CH3CHO + HO2 : 	2.70D+14*EXP(-6643/TEMP) 	;
{1875.} 	 M2BU2OLNO3 + OH = MIPKAOH + NO2 : 	5.97D-13 	;
{1876.} 	 M2BU2OLOOH + OH = ME2BU2OLO2 : 	1.90D-12*EXP(190/TEMP) 	;
{1877.} 	 M2BU2OLOOH + OH = MIPKAOH + OH : 	2.07D-11 	;
{1878.} 	 M2BU2OLOOH = ME2BU2OLO + OH : 	J(41) 	;
{1879.} 	 PROL1MCHO + OH = PROL1MCO3 : 	2.52D-11 	;
{1880.} 	 PROL1MCHO + NO3 = PROL1MCO3 + HNO3 : 	KNO3AL*8.5 	;
{1881.} 	 PROL1MCHO = MEK + HO2 + HO2 + CO : 	J(17) 	;
{1882.} 	 PROL11MO = MEK + HCHO + HO2 : 	2.00D+14*EXP(-4909/TEMP) 	;
{1883.} 	 PROL11MNO3 + OH = PROL1MCHO + NO2 : 	1.67D-12 	;
{1884.} 	 PROL11MOOH = PROL11MO + OH : 	J(41) 	;
{1885.} 	 PROL11MOOH + OH = PROL11MO2 : 	1.90D-12*EXP(190/TEMP) 	;
{1886.} 	 PROL11MOOH + OH = PROL1MCHO + OH : 	1.13D-11 	;
{1887.} 	 OH + HO2M2C4OH = H2M2C3CHO + HO2 : 	5.91D-12 	;
{1888.} 	 OH + H2M2C3CHO = H2M2C3CO3 : 	2.21D-11 	;
{1889.} 	 H2M2C3CHO = TBUTOLO2 + HO2 + CO : 	J(15) 	;
{1890.} 	 NO3 + H2M2C3CHO = H2M2C3CO3 + HNO3 : 	KNO3AL*8.5 	;
{1891.} 	 HO2M2C4O = C54O2 : 	6.10D+11*EXP(-4240/TEMP) 	;
{1892.} 	 HO2M2C4O = H2M2C3CHO + HO2 : 	KROPRIM*O2 	;
{1893.} 	 HO2M2C4NO3 = HO2M2C4O + NO2 : 	J(53) 	;
{1894.} 	 OH + HO2M2C4NO3 = H2M2C3CHO + NO2 : 	7.50D-13 	;
{1895.} 	 OH + HO2M2C4OOH = H2M2C3CHO + OH : 	1.15D-11 	;
{1896.} 	 OH + HO2M2C4OOH = HO2M2C4O2 : 	1.90D-12*EXP(190/TEMP) 	;
{1897.} 	 HO2M2C4OOH = HO2M2C4O + OH : 	J(41) 	;
{1898.} 	 PHXN = C5H11CO3 + NO2 : 	KBPAN 	;
{1899.} 	 OH + PHXN = C4H9CHO + CO + NO2 : 	5.00D-12 	;
{1900.} 	 C5H11CO3H = PEAO2 + OH : 	J(41) 	;
{1901.} 	 OH + C5H11CO3H = C5H11CO3 : 	1.16D-11 	;
{1902.} 	 OH + HO1C6NO3 = HO1CO4C6 + NO2 : 	6.28D-12 	;
{1903.} 	 HO1C6NO3 = HO1C6O + NO2 : 	J(54) 	;
{1904.} 	 HO1C6O = HO3C5CHO + HO2 : 	8.74D+11*EXP(-3430/TEMP) 	;
{1905.} 	 OH + HO1CO4C6 = C63O2 : 	1.07D-11*0.527 	;
{1906.} 	 HO1CO4C6 = C2H5CO3 + HO1C3O2 : 	J(22)*0.5 	;
{1907.} 	 HO1CO4C6 = C2H5O2 + HOC3H6CO3 : 	J(22)*0.5 	;
{1908.} 	 OH + HO1CO4C6 = CO3C5CHO + HO2 : 	1.07D-11*0.473 	;
{1909.} 	 OH + HO14C6 = HO1CO4C6 + HO2 : 	1.87D-11 	;
{1910.} 	 OH + HO1C6OOH = HO1CO4C6 + OH : 	3.68D-11 	;
{1911.} 	 HO1C6OOH = HO1C6O + OH : 	J(41) 	;
{1912.} 	 HEX2ONANO3 = HEX2ONAO + NO2 : 	J(22)+J(54) 	;
{1913.} 	 HEX2ONANO3 + OH = CO24C6 + NO2 : 	2.61D-12 	;
{1914.} 	 HEX2ONAO = CO2HOC61O2 : 	1.30D+11*EXP(-4127/TEMP) 	;
{1915.} 	 CO24C6 + OH = CO24C6O2 : 	1.86D-12 	;
{1916.} 	 CO24C6 = CH3COCH2O2 + C2H5CO3 : 	J(22) 	;
{1917.} 	 CO24C6 = CH3CO3 + MEKCO2 : 	J(22) 	;
{1918.} 	 CO2HO4C6 = CH3CO3 + HO3C4O2 : 	J(22) 	;
{1919.} 	 CO2HO4C6 + OH = CO24C6 + HO2 : 	3.75D-11 	;
{1920.} 	 HEX2ONAOOH = HEX2ONAO + OH : 	J(22)+J(41) 	;
{1921.} 	 HEX2ONAOOH + OH = HEX2ONAO2 : 	1.90D-12*EXP(190/TEMP) 	;
{1922.} 	 HEX2ONAOOH + OH = CO24C6 + OH : 	1.37D-10 	;
{1923.} 	 HEX2ONBNO3 = HEX2ONBO + NO2 : 	J(22)+J(54) 	;
{1924.} 	 HEX2ONBNO3 + OH = CO25C6 + NO2 : 	2.51D-12 	;
{1925.} 	 HEX2ONBO = CO25C6 + HO2 : 	KROSEC*O2 	;
{1926.} 	 HEX2ONBO = CH3CHO + MEKAO2 : 	2.70D+14*EXP(-7398/TEMP) 	;
{1927.} 	 OH + CO25C6 = CO25C6O2 : 	5.67D-12 	;
{1928.} 	 CO25C6 = CH3CO3 + MEKAO2 : 	J(22)*2 	;
{1929.} 	 OH + HO2CO5C6 = C61O2 : 	1.39D-11*0.349 	;
{1930.} 	 HO2CO5C6 = CH3CO3 + HO2C4O2 : 	J(22) 	;
{1931.} 	 OH + HO2CO5C6 = CO25C6 + HO2 : 	1.39D-11*0.651 	;
{1932.} 	 HEX2ONBOOH = HEX2ONBO + OH : 	J(22)+J(41) 	;
{1933.} 	 HEX2ONBOOH + OH = HEX2ONBO2 : 	1.90D-12*EXP(190/TEMP) 	;
{1934.} 	 HEX2ONBOOH + OH = CO25C6 + OH : 	3.66D-11 	;
{1935.} 	 HEX2ONCO = C3H7CHO + CH3CO3 : 	KDEC 	;
{1936.} 	 CO23C6 + OH = CO23C65O2 : 	4.81D-12 	;
{1937.} 	 CO23C6 = CH3CO3 + C3H7CO3 : 	J(35) 	;
{1938.} 	 CO2HO3C6 + OH = CO23C6 : 	1.23D-11 	;
{1939.} 	 CO2HO3C6 = CH3CO3 + C3H7CHO : 	J(22) 	;
{1940.} 	 HEX2ONCOOH = HEX2ONCO + OH : 	J(41) 	;
{1941.} 	 HEX2ONCOOH + OH = HEX2ONCO2 : 	1.90D-12*EXP(190/TEMP) 	;
{1942.} 	 HEX2ONCOOH + OH = CO23C6 + OH : 	2.94D-11 	;
{1943.} 	 HEX2ONCOOH = CH3CO3 + C3H7CHO + OH : 	J(22) 	;
{1944.} 	 OH + HO2C6NO3 = HO2CO5C6 + NO2 : 	1.03D-11 	;
{1945.} 	 HO2C6NO3 = HO2C6O + NO2 : 	J(54) 	;
{1946.} 	 HO2C6O = HO2CO5C6 + HO2 : 	4.37D+11*EXP(-2945/TEMP) 	;
{1947.} 	 OH + HO25C6 = HO2CO5C6 + HO2 : 	2.01D-11 	;
{1948.} 	 OH + HO2C6OOH = HO2CO5C6 + OH : 	3.53D-11 	;
{1949.} 	 HO2C6OOH = HO2C6O + OH : 	J(41) 	;
{1950.} 	 OH + HO3C6NO3 = HO3C5CHO + NO2 : 	1.34D-11 	;
{1951.} 	 HO3C6NO3 = HO3C6O + NO2 : 	J(54) 	;
{1952.} 	 HO3C6O = HO1CO4C6 + HO2 : 	5.55D+11*EXP(-2945/TEMP) 	;
{1953.} 	 OH + HO3C5CHO = HO3C5CO3 : 	3.78D-11*0.669 	;
{1954.} 	 HO3C5CHO = HO3C5O2 + HO2 + CO : 	J(15) 	;
{1955.} 	 OH + HO3C5CHO = CO3C5CHO + HO2 : 	3.78D-11*0.331 	;
{1956.} 	 NO3 + HO3C5CHO = HO3C5CO3 + HNO3 : 	KNO3AL*5.5 	;
{1957.} 	 OH + HO3C6OOH = HO3C6O2 : 	1.90D-12*EXP(190/TEMP) 	;
{1958.} 	 OH + HO3C6OOH = HO3C5CHO + OH : 	2.42D-11 	;
{1959.} 	 HO3C6OOH = HO3C6O + OH : 	J(41) 	;
{1960.} 	 HEX3ONDNO3 + OH = C3COCCHO + NO2 : 	3.40D-12 	;
{1961.} 	 HEX3ONDNO3 = HEX3ONDO + NO2 : 	J(53)+J(22) 	;
{1962.} 	 HEX3ONDO = C6HO1CO3O2 : 	8.40D+10*EXP(-2567/TEMP) 	;
{1963.} 	 C3COCCHO + OH = C3COCCO3 : 	7.61D-11 	;
{1964.} 	 C3COCCHO = PEN2ONE1O2 + CO + HO2 : 	J(15) 	;
{1965.} 	 C3COCCHO = C3H7CO3 + HCOCH2O2 : 	J(22) 	;
{1966.} 	 C3COCCHO + NO3 = C3COCCO3 + HNO3 : 	KNO3AL*5.5 	;
{1967.} 	 HEX3ONDOH + OH = C3COCCHO + HO2 : 	1.81D-11 	;
{1968.} 	 HEX3ONDOH = HOC2H4CO3 + NC3H7O2 : 	J(22) 	;
{1969.} 	 HEX3ONDOOH + OH = HEX3ONDO2 : 	1.90D-12*EXP(190/TEMP) 	;
{1970.} 	 HEX3ONDOOH + OH = C3COCCHO + OH : 	5.34D-11 	;
{1971.} 	 HEX3ONDOOH = HEX3ONDO + OH : 	J(41)+J(22) 	;
{1972.} 	 HEX3ONCO = CH3CHO + C3H7CO3 : 	KDEC 	;
{1973.} 	 HEX3ONCOH + OH = CO23C6 + HO2 : 	1.01D-11 	;
{1974.} 	 HEX3ONCOH = C3H7CO3 + CH3CHO + HO2 : 	J(22) 	;
{1975.} 	 HEX3ONCOOH + OH = HEX3ONCO2 : 	1.90D-12*EXP(190/TEMP) 	;
{1976.} 	 HEX3ONCOOH + OH = CO23C6 + OH : 	2.34D-11 	;
{1977.} 	 HEX3ONCOOH = HEX3ONCO + OH : 	J(41) 	;
{1978.} 	 HEX3ONCOOH = CH3CHO + C3H7CO3 + OH : 	J(22) 	;
{1979.} 	 HEX3ONBO = C2H5CHO + C2H5CO3 : 	KDEC 	;
{1980.} 	 C6CO34 + OH = C6CO34O2 : 	2.54D-12 	;
{1981.} 	 C6CO34 = C2H5CO3 + C2H5CO3 : 	J(35) 	;
{1982.} 	 C6CO3HO4 + OH = C6CO34 + HO2 : 	1.13D-11 	;
{1983.} 	 C6CO3HO4 = C2H5CO3 + C2H5CHO + HO2 : 	J(22) 	;
{1984.} 	 HEX3ONBOOH + OH = HEX3ONBO2 : 	1.90D-12*EXP(190/TEMP) 	;
{1985.} 	 HEX3ONBOOH + OH = C6CO34 + OH : 	2.84D-11 	;
{1986.} 	 HEX3ONBOOH = HEX3ONBO + OH : 	J(41) 	;
{1987.} 	 HEX3ONBOOH = C2H5CHO + C2H5CO3 + OH : 	J(22) 	;
{1988.} 	 HEX3ONANO3 + OH = CO24C6 + NO2 : 	2.96D-12 	;
{1989.} 	 HEX3ONANO3 = HEX3ONAO + NO2 : 	J(53)+J(22) 	;
{1990.} 	 HEX3ONAO = C6CO3OH5O2 : 	8.40D+10*EXP(-2567/TEMP) 	;
{1991.} 	 HEX3ONAOH + OH = CO24C6 + HO2 : 	2.97D-11 	;
{1992.} 	 HEX3ONAOH = IPROPOLO2 + C2H5CO3 : 	J(22) 	;
{1993.} 	 HEX3ONAOOH + OH = HEX3ONAO2 : 	1.90D-12*EXP(190/TEMP) 	;
{1994.} 	 HEX3ONAOOH + OH = CO24C6 + OH : 	1.07D-10 	;
{1995.} 	 HEX3ONAOOH = HEX3ONAO + OH : 	J(41) 	;
{1996.} 	 HEX3ONAOOH = IC3H7O2 + C2H5CO3 : 	J(22) 	;
{1997.} 	 HOCH2CO2H + OH = HCHO + HO2 : 	2.73D-12 	;
{1998.} 	 PHAN = HOCH2CO3 + NO2 : 	KBPAN 	;
{1999.} 	 PHAN + OH = HCHO + CO + NO2 : 	1.12D-12 	;
{2000.} 	 HOCH2CO3H + OH = HOCH2CO3 : 	6.19D-12 	;
{2001.} 	 HOCH2CO3H = HCHO + HO2 + OH : 	J(41) 	;
{2002.} 	 NO3CH2CO2H + OH = HCHO + NO2 : 	1.68D-13 	;
{2003.} 	 NO3CH2CO3H + OH = NO3CH2CO3 : 	3.63D-12 	;
{2004.} 	 NO3CH2CO3H = HCHO + NO2 + OH : 	J(41) 	;
{2005.} 	 NO3CH2PAN = NO3CH2CO3 + NO2 : 	KBPAN 	;
{2006.} 	 NO3CH2PAN + OH = HCHO + CO + NO2 + NO2 : 	1.12D-14 	;
{2007.} 	 IPROPOLPER + OH = CH3CHOHCO3 : 	9.34D-12 	;
{2008.} 	 IPROPOLPER = CH3CHO + HO2 + OH : 	J(41) 	;
{2009.} 	 IPROPOLPAN = CH3CHOHCO3 + NO2 : 	KBPAN 	;
{2010.} 	 IPROPOLPAN + OH = CH3CHO + CO + NO2 : 	2.34D-12 	;
{2011.} 	 PRNO3CO2H + OH = CH3CHO + NO2 : 	3.14D-13 	;
{2012.} 	 PRNO3PAN = PRNO3CO3 + NO2 : 	KBPAN 	;
{2013.} 	 PRNO3PAN + OH = CH3CHO + CO + NO2 + NO2 : 	1.43D-13 	;
{2014.} 	 PRNO3CO3H + OH = PRNO3CO3 : 	3.77D-12 	;
{2015.} 	 PRNO3CO3H = CH3CHO + NO2 + OH : 	J(41) 	;
{2016.} 	 HO3C3PAN = HO3C3CO3 + NO2 : 	KBPAN 	;
{2017.} 	 HO3C3PAN + OH = C2H5CHO + CO + NO2 : 	3.82D-12 	;
{2018.} 	 HO3C3CO3H + OH = HO3C3CO3 : 	1.38D-11 	;
{2019.} 	 HO3C3CO3H = C2H5CHO + HO2 + OH : 	J(41) 	;
{2020.} 	 CO3C4NO3O = NO3CH2CO3 + CH3CHO : 	KDEC 	;
{2021.} 	 CO23C4NO3 = NO3CH2CO3 + CH3CO3 : 	J(35) 	;
{2022.} 	 CO23C4NO3 = BIACETO + NO2 : 	J(56) 	;
{2023.} 	 CO23C4NO3 + OH = CO23C3CHO + NO2 : 	1.30D-13 	;
{2024.} 	 CO23C4NO3 = HCHO + CH3CO3 + NO2 + CO : 	J(57) 	;
{2025.} 	 CO3C4NO3OH = HO2CO3C4O + NO2 : 	J(56) 	;
{2026.} 	 CO3C4NO3OH + OH = CO23C4NO3 + HO2 : 	5.65D-12 	;
{2027.} 	 CO3C4NO3OH = CH3CHOHCO3 + HCHO + NO2 : 	J(57) 	;
{2028.} 	 COC4NO3OOH = CO3C4NO3O + OH : 	J(41)+J(53) 	;
{2029.} 	 COC4NO3OOH + OH = CO3C4NO3O2 : 	1.64D-11 	;
{2030.} 	 BZFUO2 = BZFUO : 	8.80D-13*RO2*0.6 	;
{2031.} 	 BZFUO2 = BZFUOH : 	8.80D-13*RO2*0.2 	;
{2032.} 	 BZFUO2 = BZFUCO : 	8.80D-13*RO2*0.2 	;
{2033.} 	 BZFUO2 + NO = BZFUO + NO2 : 	KRO2NO 	;
{2034.} 	 BZFUO2 + HO2 = BZFUOOH : 	KRO2HO2*0.706 	;
{2035.} 	 BZFUO2 + NO3 = BZFUO + NO2 : 	KRO2NO3 	;
{2036.} 	 BZFUONOOA = BZFUONOO : 	KDEC*0.5 	;
{2037.} 	 BZFUONOOA = CO + HCOCH2O2 + OH : 	KDEC*0.5 	;
{2038.} 	 NBZFUO2 = NBZFUO : 	8.80D-13*RO2 	;
{2039.} 	 NBZFUO2 + NO = NBZFUO + NO2 : 	KRO2NO 	;
{2040.} 	 NBZFUO2 + HO2 = NBZFUOOH : 	KRO2HO2*0.625 	;
{2041.} 	 NBZFUO2 + NO3 = NBZFUO + NO2 : 	KRO2NO3 	;
{2042.} 	 MALDIALCO2 = GLYOX + HO2 + CO : 	KDEC*0.40 	;
{2043.} 	 MALDIALCO2 = MALANHY + HO2 : 	KDEC*0.60 	;
{2044.} 	 MALDALCO2H + OH = MALDIALCO2 : 	3.70D-11 	;
{2045.} 	 MALDALCO2H = HCOCO2H + HO2 + CO + HO2 + CO : 	J(19)+J(18) 	;
{2046.} 	 MALDALCO3H = MALDIALCO2 + OH : 	J(41) 	;
{2047.} 	 MALDALCO3H + OH = MALDIALCO3 : 	4.00D-11 	;
{2048.} 	 MALDALCO3H = HCOCO3H + HO2 + CO + HO2 + CO : 	J(18)+J(19) 	;
{2049.} 	 MALDIALPAN = MALDIALCO3 + NO2 : 	KBPAN 	;
{2050.} 	 MALDIALPAN + OH = GLYOX + CO + CO + NO2 : 	3.70D-11 	;
{2051.} 	 C32OH13CO + OH = HCOCOHCO3 : 	1.36D-10 	;
{2052.} 	 C32OH13CO = GLYOX + HO2 + HO2 + CO : 	J(15)*2 	;
{2053.} 	 HCOCOHCO3 = GLYOX + HO2 : 	1.00D-11*RO2 	;
{2054.} 	 HCOCOHCO3 + HO2 = HCOCOHCO3H : 	KAPHO2 	;
{2055.} 	 HCOCOHCO3 + NO2 = HCOCOHPAN : 	KFPAN 	;
{2056.} 	 HCOCOHCO3 + NO = GLYOX + HO2 + NO2 : 	KAPNO 	;
{2057.} 	 HCOCOHCO3 + NO3 = GLYOX + HO2 + NO2 : 	KRO2NO3*1.60 	;
{2058.} 	 EPXDLCO2H + OH = C3DIALO2 : 	2.31D-11 	;
{2059.} 	 EPXDLCO2H = C3DIALO2 + HO2 : 	J(17) 	;
{2060.} 	 EPXDLCO3H = C3DIALO2 + OH : 	J(41)+J(17) 	;
{2061.} 	 EPXDLCO3H + OH = EPXDLCO3 : 	2.62D-11 	;
{2062.} 	 EPXDLPAN = EPXDLCO3 + NO2 : 	KBPAN 	;
{2063.} 	 EPXDLPAN + OH = C33CO + CO + NO2 : 	2.29D-11 	;
{2064.} 	 C33CO + OH = CO + CO + CO + HO2 : 	5.77D-11 	;
{2065.} 	 C33CO = CO + HO2 + CO + CO + HO2 : 	J(15)*2 	;
{2066.} 	 C3DIALO = GLYOX + CO + HO2 : 	KDEC 	;
{2067.} 	 C3DIALOOH = C3DIALO + OH : 	J(41) 	;
{2068.} 	 C3DIALOOH + OH = C33CO + OH : 	1.44D-10 	;
{2069.} 	 C3DIALOOH = GLYOX + CO + HO2 + OH : 	J(15)*2 	;
{2070.} 	 MALDIALO = GLYOX + GLYOX + HO2 : 	KDEC 	;
{2071.} 	 HOCOC4DIAL + OH = CO2C4DIAL + HO2 : 	3.67D-11 	;
{2072.} 	 HOCOC4DIAL = HCOCOHCO3 + HO2 + CO : 	J(15)+J(34) 	;
{2073.} 	 HOHOC4DIAL + OH = HOCOC4DIAL + HO2 : 	8.13D-11 	;
{2074.} 	 HOHOC4DIAL = C32OH13CO + HO2 + HO2 + CO : 	J(15)*2 	;
{2075.} 	 MALDIALOOH = MALDIALO + OH : 	J(41) 	;
{2076.} 	 MALDIALOOH + OH = MALDIALO2 : 	1.90D-12*EXP(190/TEMP) 	;
{2077.} 	 MALDIALOOH + OH = HOCOC4DIAL + OH : 	1.22D-10 	;
{2078.} 	 MALDIALOOH = C32OH13CO + CO + OH + HO2 : 	J(15)*2 	;
{2079.} 	 C6H5OOH = C6H5O + OH : 	J(41) 	;
{2080.} 	 C6H5OOH + OH = C6H5O2 : 	3.60D-12 	;
{2081.} 	 NPHEN1O + O3 = NPHEN1O2 : 	2.86D-13 	;
{2082.} 	 NPHEN1O + NO2 = DNPHEN : 	2.08D-12 	;
{2083.} 	 PBZQONE + OH = PBZQO2 : 	4.60D-12 	;
{2084.} 	 PBZQONE + NO3 = NBZQO2 : 	3.00D-13 	;
{2085.} 	 CATEC1O2 = CATEC1O : 	8.80D-13*RO2 	;
{2086.} 	 CATEC1O2 + NO = CATEC1O + NO2 : 	KRO2NO 	;
{2087.} 	 CATEC1O2 + HO2 = CATEC1OOH : 	KRO2HO2*0.770 	;
{2088.} 	 CATEC1O2 + NO3 = CATEC1O + NO2 : 	KRO2NO3 	;
{2089.} 	 NCATECHOL + OH = NCATECO2 : 	3.47D-12 	;
{2090.} 	 NCATECHOL + NO3 = NNCATECO2 : 	2.60D-12 	;
{2091.} 	 PHCOOH + OH = C6H5O2 : 	1.10D-12 	;
{2092.} 	 PBZN = C6H5CO3 + NO2 : 	KBPAN*0.67 	;
{2093.} 	 PBZN + OH = C6H5OOH + CO + NO2 : 	1.06D-12 	;
{2094.} 	 C6H5CO3H = C6H5O2 + OH : 	J(41) 	;
{2095.} 	 C6H5CO3H + OH = C6H5CO3 : 	4.66D-12 	;
{2096.} 	 TLFUO2 = TLFUO : 	9.20D-14*RO2*0.7 	;
{2097.} 	 TLFUO2 = TLFUOH : 	9.20D-14*RO2*0.3 	;
{2098.} 	 TLFUO2 + NO = TLFUO + NO2 : 	KRO2NO 	;
{2099.} 	 TLFUO2 + HO2 = TLFUOOH : 	KRO2HO2*0.706 	;
{2100.} 	 TLFUO2 + NO3 = TLFUO + NO2 : 	KRO2NO3 	;
{2101.} 	 TLFUONOOA = TLFUONOO : 	KDEC*0.5 	;
{2102.} 	 TLFUONOOA = CO + OH + MECOACETO2 : 	KDEC*0.5 	;
{2103.} 	 NTLFUO2 = NTLFUO : 	9.20D-14*RO2 	;
{2104.} 	 NTLFUO2 + NO = NTLFUO + NO2 : 	KRO2NO 	;
{2105.} 	 NTLFUO2 + HO2 = NTLFUOOH : 	KRO2HO2*0.706 	;
{2106.} 	 NTLFUO2 + NO3 = NTLFUO + NO2 : 	KRO2NO3 	;
{2107.} 	 C5DICARBO2 = C5DICARBO : 	1.40D-12*0.60*RO2 	;
{2108.} 	 C5DICARBO2 = C5134CO2OH : 	1.40D-12*0.20*RO2 	;
{2109.} 	 C5DICARBO2 = C514CO23OH : 	1.40D-12*0.20*RO2 	;
{2110.} 	 C5DICARBO2 + NO = C5DICARBO + NO2 : 	KRO2NO 	;
{2111.} 	 C5DICARBO2 + HO2 = C5DICAROOH : 	KRO2HO2*0.706 	;
{2112.} 	 C5DICARBO2 + NO3 = C5DICARBO + NO2 : 	KRO2NO3 	;
{2113.} 	 MC3CODBCO3 = MC3ODBCO2H : 	1.00D-11*0.30*RO2 	;
{2114.} 	 MC3CODBCO3 = MC3CODBCO2 : 	1.00D-11*0.70*RO2 	;
{2115.} 	 MC3CODBCO3 + HO2 = MC3ODBCO2H + O3 : 	KAPHO2*0.29 	;
{2116.} 	 MC3CODBCO3 + HO2 = MC3ODBCO3H : 	KAPHO2*0.71 	;
{2117.} 	 MC3CODBCO3 + NO2 = MC3CODBPAN : 	KFPAN 	;
{2118.} 	 MC3CODBCO3 + NO = MC3CODBCO2 + NO2 : 	KAPNO 	;
{2119.} 	 MC3CODBCO3 + NO3 = MC3CODBCO2 + NO2 : 	KRO2NO3*1.60 	;
{2120.} 	 PXYFUONE + OH = PXYFUO2 : 	2.42D-11 	;
{2121.} 	 PXYFUONE + O3 = OH + CO + MCOCOMOXO2 : 	8.00D-19 	;
{2122.} 	 PXYFUONE + NO3 = NPXYFUO2 : 	1.00D-12 	;
{2123.} 	 C4M2ALOHO2 = C4M2ALOHO : 	9.20D-14*RO2*0.70 	;
{2124.} 	 C4M2ALOHO2 = C4M2AL2OH : 	9.20D-14*RO2*0.30 	;
{2125.} 	 C4M2ALOHO2 + NO = C4M2ALOHO + NO2 : 	KRO2NO 	;
{2126.} 	 C4M2ALOHO2 + HO2 = C4MALOHOOH : 	KRO2HO2*0.706 	;
{2127.} 	 C4M2ALOHO2 + NO3 = C4M2ALOHO + NO2 : 	KRO2NO3 	;
{2128.} 	 C3MCODBCO3 = C3MCODBCO2 : 	1.00D-11*RO2 	;
{2129.} 	 C3MCODBCO3 + HO2 = C4CODBCO3H : 	KAPHO2 	;
{2130.} 	 C3MCODBCO3 + NO2 = C3MCODBPAN : 	KFPAN 	;
{2131.} 	 C3MCODBCO3 + NO = C3MCODBCO2 + NO2 : 	KAPNO 	;
{2132.} 	 C3MCODBCO3 + NO3 = NO2 + C3MCODBCO2 : 	KRO2NO3*1.60 	;
{2133.} 	 C5CO14OH + OH = C5CO14CO2 : 	5.44D-11 	;
{2134.} 	 C5CO14OH = CH3CO3 + HCOCO2H + HO2 + CO : 	J(24)+J(23) 	;
{2135.} 	 C5CO14CO2 = MGLYOX + HO2 + CO : 	KDEC*0.17 	;
{2136.} 	 C5CO14CO2 = MALANHY + CH3O2 : 	KDEC*0.83 	;
{2137.} 	 C5COO2NO2 = C5CO14O2 + NO2 : 	KBPAN 	;
{2138.} 	 C5COO2NO2 + OH = MGLYOX + CO + CO + NO2 : 	5.43D-11 	;
{2139.} 	 C5CO14OOH + OH = C5CO14O2 : 	3.59D-12 	;
{2140.} 	 C5CO14OOH = C5CO14CO2 + OH : 	J(41) 	;
{2141.} 	 OH + CH3COCO2H = CH3CO3 : 	8.0D-13 	;
{2142.} 	 CH3COCO2H = CH3CO3 + HO2 : 	J(34) 	;
{2143.} 	 OXYL1OOH + OH = OXYL1O2 : 	4.65D-11 	;
{2144.} 	 OXYL1OOH = TOL1O + OH : 	J(41) 	;
{2145.} 	 NCRES1O + O3 = NCRES1O2 : 	2.86D-13 	;
{2146.} 	 NCRES1O + NO2 = DNCRES : 	2.08D-12 	;
{2147.} 	 PTLQONE + OH = PTLQO2 : 	2.35D-11 	;
{2148.} 	 PTLQONE + NO3 = NPTLQO2 : 	1.00D-12 	;
{2149.} 	 MCATEC1O2 = MCATEC1O : 	8.80D-13*RO2 	;
{2150.} 	 MCATEC1O2 + NO = MCATEC1O + NO2 : 	KRO2NO 	;
{2151.} 	 MCATEC1O2 + HO2 = MCATEC1OOH : 	KRO2HO2*0.820 	;
{2152.} 	 MCATEC1O2 + NO3 = MCATEC1O + NO2 : 	KRO2NO3 	;
{2153.} 	 MNCATECH + OH = MNCATECO2 : 	6.83D-12 	;
{2154.} 	 MNCATECH + NO3 = MNNCATECO2 : 	5.03D-12 	;
{2155.} 	 OH + C58NO3 = ACETOL + GLYOX + HO2 + NO2 : 	2.32D-11 	;
{2156.} 	 C58O = ACETOL + GLYOX + HO2 : 	KDEC 	;
{2157.} 	 OH + C58OH = C58O : 	3.04D-11 	;
{2158.} 	 C58OOH = C58O + OH : 	J(41) 	;
{2159.} 	 OH + C58OOH = C58O2 : 	3.16D-11 	;
{2160.} 	 OH + HC4ACO2H = ACETOL + CO + HO2 : 	2.52D-11 	;
{2161.} 	 OH + HC4ACO3H = HC4ACO3 : 	2.88D-11 	;
{2162.} 	 HC4ACO3H = ACETOL + CO + HO2 + OH : 	J(41) 	;
{2163.} 	 C5PAN17 = HC4ACO3 + NO2 : 	KBPAN 	;
{2164.} 	 OH + C5PAN17 = MACROH + CO + NO2 : 	2.52D-11 	;
{2165.} 	 ACLOO + CO = ACETOL : 	1.2D-15 	;
{2166.} 	 ACLOO + NO = ACETOL + NO2 : 	1.0D-14 	;
{2167.} 	 ACLOO = ACETOL + H2O2 : 	6.0D-18*H2O 	;
{2168.} 	 ACLOO + SO2 = ACETOL + SO3 : 	7.0D-14 	;
{2169.} 	 ACLOO + NO2 = ACETOL + NO3 : 	1.0D-15 	;
{2170.} 	 MVKOHBO2 = MVKOHBO : 	8.80D-13*RO2*0.6 	;
{2171.} 	 MVKOHBO2 = MVKOHAOH : 	8.80D-13*RO2*0.2 	;
{2172.} 	 MVKOHBO2 = H14CO23C4 : 	8.80D-13*RO2*0.2 	;
{2173.} 	 MVKOHBO2 + NO = MVKOHBO + NO2 : 	KRO2NO 	;
{2174.} 	 MVKOHBO2 + HO2 = MVKOHBOOH : 	KRO2HO2*0.625 	;
{2175.} 	 MVKOHBO2 + NO3 = MVKOHBO + NO2 : 	KRO2NO3 	;
{2176.} 	 MVKOHAO2 + NO = MVKOHANO3 : 	KRO2NO*0.017 	;
{2177.} 	 MVKOHAO2 = MVKOHAO : 	2.00D-12*RO2*0.6 	;
{2178.} 	 MVKOHAO2 = MVKOHAOH : 	2.00D-12*RO2*0.2 	;
{2179.} 	 MVKOHAO2 = H13CO2CHO : 	2.00D-12*RO2*0.2 	;
{2180.} 	 MVKOHAO2 + NO = MVKOHAO + NO2 : 	KRO2NO*0.983 	;
{2181.} 	 MVKOHAO2 + HO2 = MVKOHAOOH : 	KRO2HO2*0.625 	;
{2182.} 	 MVKOHAO2 + NO3 = MVKOHAO + NO2 : 	KRO2NO3 	;
{2183.} 	 OH + ALLYLOH = ACR + HO2 : 	2.59D-11 	;
{2184.} 	 OH + HOCH2COCHO = HOCH2CO3 + CO : 	1.44D-11 	;
{2185.} 	 HOCH2COCHO = HOCH2CO3 + CO + HO2 : 	J(34) 	;
{2186.} 	 NO3 + HOCH2COCHO = HOCH2CO3 + CO + HNO3 : 	KNO3AL*2.4 	;
{2187.} 	 HMGLOOA = HMGLOO : 	KDEC*0.24 	;
{2188.} 	 HMGLOOA = OH + CO + HOCH2CO3 : 	KDEC*0.36 	;
{2189.} 	 HMGLOOA = HOCH2CHO : 	KDEC*0.20 	;
{2190.} 	 HMGLOOA = HOCH2CO3 + HO2 : 	KDEC*0.20 	;
{2191.} 	 OH + HC4CCO2H = CH3CO3 + HOCH2CHO : 	2.52D-11 	;
{2192.} 	 OH + HC4CCO3H = HC4CCO3 : 	2.88D-11 	;
{2193.} 	 HC4CCO3H = HOCH2CHO + CH3CO3 + OH : 	J(41) 	;
{2194.} 	 C5PAN19 = HC4CCO3 + NO2 : 	KBPAN 	;
{2195.} 	 OH + C5PAN19 = HO12CO3C4 + CO + NO2 : 	2.52D-11 	;
{2196.} 	 C57O = MGLYOX + HOCH2CHO + HO2 : 	KDEC 	;
{2197.} 	 OH + C57OH = C57O : 	3.04D-11 	;
{2198.} 	 C57OOH = C57O + OH : 	J(41) 	;
{2199.} 	 OH + C57OOH = C57O2 : 	3.16D-11 	;
{2200.} 	 GAOO + CO = HOCH2CHO : 	1.2D-15 	;
{2201.} 	 GAOO = HOCH2CO2H : 	1.0D-17*H2O 	;
{2202.} 	 GAOO + NO = HOCH2CHO + NO2 : 	1.0D-14 	;
{2203.} 	 GAOO = HOCH2CHO + H2O2 : 	6.0D-18*H2O 	;
{2204.} 	 GAOO + SO2 = HOCH2CHO + SO3 : 	7.0D-14 	;
{2205.} 	 GAOO + NO2 = HOCH2CHO + NO3 : 	1.0D-15 	;
{2206.} 	 C59O = ACETOL + HOCH2CO3 : 	KDEC 	;
{2207.} 	 OH + C59OOH = C59O2 : 	9.70D-12 	;
{2208.} 	 C59OOH = C59O + OH : 	J(41) 	;
{2209.} 	 C59OOH = HOCH2CO3 + ACETOL + OH : 	J(22) 	;
{2210.} 	 OH + NC4CO2H = NOA + CO + HO2 : 	2.16D-11 	;
{2211.} 	 C5PAN18 = NC4CO3 + NO2 : 	KBPAN 	;
{2212.} 	 OH + C5PAN18 = NOA + CO + CO + NO2 : 	2.16D-11 	;
{2213.} 	 OH + NC4CO3H = NC4CO3 : 	2.52D-11 	;
{2214.} 	 NC4CO3H = NOA + CO + HO2 + OH : 	J(41) 	;
{2215.} 	 C510O = NOA + GLYOX + HO2 : 	KDEC 	;
{2216.} 	 OH + C510OH = C510O : 	2.69D-11 	;
{2217.} 	 C510OOH = C510O + OH : 	J(41) 	;
{2218.} 	 OH + C510OOH = C510O2 : 	2.81D-11 	;
{2219.} 	 NOAOO + CO = NOA : 	1.2D-15 	;
{2220.} 	 NOAOO + NO = NOA + NO2 : 	1.0D-14 	;
{2221.} 	 NOAOO = NOA + H2O2 : 	6.0D-18*H2O 	;
{2222.} 	 NOAOO + SO2 = NOA + SO3 : 	7.0D-14 	;
{2223.} 	 NOAOO + NO2 = NOA + NO3 : 	1.0D-15 	;
{2224.} 	 CO2H3CO3 = MGLYOX + HO2 : 	1.00D-11*RO2 	;
{2225.} 	 CO2H3CO3 + HO2 = CO2H3CO3H : 	KAPHO2 	;
{2226.} 	 CO2H3CO3 + NO2 = C4PAN6 : 	KFPAN 	;
{2227.} 	 CO2H3CO3 + NO = MGLYOX + HO2 + NO2 : 	KAPNO 	;
{2228.} 	 CO2H3CO3 + NO3 = MGLYOX + HO2 + NO2 : 	KRO2NO3*1.60 	;
{2229.} 	 OH + CO23C3CHO = CH3CO3 + CO + CO : 	1.23D-11 	;
{2230.} 	 CO23C3CHO = CH3CO3 + CO + CO + HO2 : 	J(34) 	;
{2231.} 	 CO23C3CHO = CH3CO3 + HCOCO3 : 	J(35) 	;
{2232.} 	 NO3 + CO23C3CHO = CH3CO3 + CO + CO + HNO3 : 	KNO3AL*4.0 	;
{2233.} 	 ACO3 = ACO2H : 	1.00D-11*0.3*RO2 	;
{2234.} 	 ACO3 + HO2 = ACO3H : 	KAPHO2*0.71 	;
{2235.} 	 ACO3 + HO2 = ACO2H + O3 : 	KAPHO2*0.29 	;
{2236.} 	 ACO3 + NO2 = ACRPAN : 	KFPAN 	;
{2237.} 	 ACO3 = HO2 + CO + HCHO : 	1.00D-11*0.7*RO2 	;
{2238.} 	 ACO3 + NO = HO2 + CO + HCHO + NO2 : 	KAPNO 	;
{2239.} 	 ACO3 + NO3 = HO2 + CO + HCHO + NO2 : 	KRO2NO3*1.60 	;
{2240.} 	 CHOMOHCO3 + NO2 = CHOMOHPAN : 	KFPAN 	;
{2241.} 	 CHOMOHCO3 + HO2 = CHOMOHCO3H : 	KAPHO2 	;
{2242.} 	 CHOMOHCO3 = MGLYOX + HO2 : 	1.00D-11*RO2 	;
{2243.} 	 CHOMOHCO3 + NO = MGLYOX + NO2 + HO2 : 	KAPNO 	;
{2244.} 	 CHOMOHCO3 + NO3 = MGLYOX + NO2 + HO2 : 	KRO2NO3*1.60 	;
{2245.} 	 CH3CHOOB = CH3CHOO : 	KDEC*0.18 	;
{2246.} 	 CH3CHOOB = CH3O2 + CO + OH : 	KDEC*0.57 	;
{2247.} 	 CH3CHOOB = CH4 : 	KDEC*0.125 	;
{2248.} 	 CH3CHOOB = CH3O2 + HO2 : 	KDEC*0.125 	;
{2249.} 	 DMSO2O = CH3SO2 + HCHO : 	KDEC 	;
{2250.} 	 CH3SO2CHO + OH = CH3SO2 + CO : 	1.78D-12 	;
{2251.} 	 CH3SO2CHO = CH3SO2 + CO + HO2 : 	J(15) 	;
{2252.} 	 DMSO2OH + OH = DMSO2O : 	1.40D-13 	;
{2253.} 	 DMSO2OH + OH = CH3SO2CHO + HO2 : 	5.23D-13 	;
{2254.} 	 DMSO2OOH = DMSO2O + OH : 	J(41) 	;
{2255.} 	 DMSO2OOH + OH = CH3SO2CHO + OH : 	1.26D-12 	;
{2256.} 	 DMSO2OOH + OH = DMSO2O2 : 	3.60D-12 	;
{2257.} 	 CH3SOO = CH3S : 	3.50D+10*EXP(-3560/TEMP) 	;
{2258.} 	 CH3SOO = CH3SO2 : 	8.00D+00 	;
{2259.} 	 CH3SOO + NO = CH3SO + NO2 : 	1.00D-11 	;
{2260.} 	 CH3SOO + NO2 = CH3SO + NO3 : 	2.20D-11 	;
{2261.} 	 CH3SO = CH3SOO2 : 	3.12D-16*EXP(1580/TEMP)*O2 	;
{2262.} 	 CH3SO + O3 = CH3O2 + SO2 : 	4.00D-13 	;
{2263.} 	 CH3SO + NO2 = CH3SO2 + NO : 	1.20D-11*0.75 	;
{2264.} 	 CH3SO + NO2 = CH3O2 + SO2 + NO : 	1.20D-11*0.25 	;
{2265.} 	 HOC2H4CO3 = HOC2H4CO2H : 	1.00D-11*0.3*RO2 	;
{2266.} 	 HOC2H4CO3 = HOCH2CH2O2 : 	1.00D-11*0.7*RO2 	;
{2267.} 	 HOC2H4CO3 + NO = HOCH2CH2O2 + NO2 : 	KAPNO 	;
{2268.} 	 HOC2H4CO3 + NO2 = C3PAN1 : 	KFPAN 	;
{2269.} 	 HOC2H4CO3 + HO2 = HOC2H4CO3H : 	KAPHO2*0.71 	;
{2270.} 	 HOC2H4CO3 + HO2 = HOC2H4CO2H + O3 : 	KAPHO2*0.29 	;
{2271.} 	 HOC2H4CO3 + NO3 = HOCH2CH2O2 + NO2 : 	KRO2NO3*1.60 	;
{2272.} 	 HCOCH2O2 = HOCH2CHO : 	2.00D-12*0.2*RO2 	;
{2273.} 	 HCOCH2O2 = GLYOX : 	2.00D-12*0.2*RO2 	;
{2274.} 	 HCOCH2O2 = HCOCH2O : 	2.00D-12*0.6*RO2 	;
{2275.} 	 HCOCH2O2 + HO2 = HCOCH2OOH : 	KRO2HO2*0.387 	;
{2276.} 	 HCOCH2O2 + NO = NO2 + HCOCH2O : 	KRO2NO 	;
{2277.} 	 HCOCH2O2 + NO3 = HCOCH2O + NO2 : 	KRO2NO3 	;
{2278.} 	 CO2C3CO3 = CH3COCH2O2 : 	1.00D-11*RO2 	;
{2279.} 	 CO2C3CO3 + NO = CH3COCH2O2 + NO2 : 	KAPNO 	;
{2280.} 	 CO2C3CO3 + NO2 = CO2C3PAN : 	KFPAN 	;
{2281.} 	 CO2C3CO3 + HO2 = CO2C3CO3H : 	KAPHO2 	;
{2282.} 	 CO2C3CO3 + NO3 = CH3COCH2O2 + NO2 : 	KRO2NO3*1.60 	;
{2283.} 	 HO2C3CO3 = HO2C3CO3H : 	1.00D-11*0.3*RO2 	;
{2284.} 	 HO2C3CO3 = IPROPOLO2 : 	1.00D-11*0.7*RO2 	;
{2285.} 	 HO2C3CO3 + HO2 = HO2C3CO2H + O3 : 	KAPHO2*0.29 	;
{2286.} 	 HO2C3CO3 + HO2 = HO2C3CO3H : 	KAPHO2*0.71 	;
{2287.} 	 HO2C3CO3 + NO2 = C4PAN3 : 	KFPAN 	;
{2288.} 	 HO2C3CO3 + NO = IPROPOLO2 + NO2 : 	KAPNO 	;
{2289.} 	 HO2C3CO3 + NO3 = IPROPOLO2 + NO2 : 	KRO2NO3*1.60 	;
{2290.} 	 HOC3H6CO3 = HOC3H6CO2H : 	1.00D-11*0.3*RO2 	;
{2291.} 	 HOC3H6CO3 = HO1C3O2 : 	1.00D-11*0.7*RO2 	;
{2292.} 	 HOC3H6CO3 + HO2 = HOC3H6CO2H + O3 : 	KAPHO2*0.29 	;
{2293.} 	 HOC3H6CO3 + HO2 = HOC3H6CO3H : 	KAPHO2*0.71 	;
{2294.} 	 HOC3H6CO3 + NO2 = C4PAN1 : 	KFPAN 	;
{2295.} 	 HOC3H6CO3 + NO = HO1C3O2 + NO2 : 	KAPNO*4.0 	;
{2296.} 	 HOC3H6CO3 + NO3 = HO1C3O2 + NO2 : 	KRO2NO3*1.60 	;
{2297.} 	 HO1CO3C4O2 = HO1CO3C4O : 	2.00D-12*0.6*RO2 	;
{2298.} 	 HO1CO3C4O2 = HO1CO3CHO : 	2.00D-12*0.2*RO2 	;
{2299.} 	 HO1CO3C4O2 = HO14CO2C4 : 	2.00D-12*0.2*RO2 	;
{2300.} 	 HO1CO3C4O2 + NO = HO1CO3C4O + NO2 : 	KRO2NO 	;
{2301.} 	 HO1CO3C4O2 + HO2 = HOCO3C4OOH : 	KRO2HO2*0.625 	;
{2302.} 	 HO1CO3C4O2 + NO3 = HO1CO3C4O + NO2 : 	KRO2NO3 	;
{2303.} 	 BIACETO2 = BIACETO : 	2.00D-12*0.6*RO2 	;
{2304.} 	 BIACETO2 = CO23C3CHO : 	2.00D-12*0.2*RO2 	;
{2305.} 	 BIACETO2 = BIACETOH : 	2.00D-12*0.2*RO2 	;
{2306.} 	 BIACETO2 + HO2 = BIACETOOH : 	KRO2HO2*0.625 	;
{2307.} 	 BIACETO2 + NO = BIACETO + NO2 : 	KRO2NO 	;
{2308.} 	 BIACETO2 + NO3 = BIACETO + NO2 : 	KRO2NO3 	;
{2309.} 	 HOIPRCO3 = HOIPRCO2H : 	1.00D-11*0.3*RO2 	;
{2310.} 	 HOIPRCO3 = HYPROPO2 : 	1.00D-11*0.7*RO2 	;
{2311.} 	 HOIPRCO3 + HO2 = HOIPRCO2H + O3 : 	KAPHO2*0.29 	;
{2312.} 	 HOIPRCO3 + HO2 = HOIPRCO3H : 	KAPHO2*0.71 	;
{2313.} 	 HOIPRCO3 + NO2 = C4PAN4 : 	KFPAN 	;
{2314.} 	 HOIPRCO3 + NO = HYPROPO2 + NO2 : 	KAPNO 	;
{2315.} 	 HOIPRCO3 + NO3 = HYPROPO2 + NO2 : 	KRO2NO3*1.60 	;
{2316.} 	 IBUDIALCO3 = PRPAL2CO2H : 	1.00D-11*0.3*RO2 	;
{2317.} 	 IBUDIALCO3 = PROPALO2 : 	1.00D-11*0.7*RO2 	;
{2318.} 	 IBUDIALCO3 + HO2 = PRPAL2CO2H + O3 : 	KAPHO2*0.29 	;
{2319.} 	 IBUDIALCO3 + HO2 = PRPAL2CO3H : 	KAPHO2*0.71 	;
{2320.} 	 IBUDIALCO3 + NO2 = IBUDIALPAN : 	KFPAN 	;
{2321.} 	 IBUDIALCO3 + NO = PROPALO2 + NO2 : 	KAPNO 	;
{2322.} 	 IBUDIALCO3 + NO3 = PROPALO2 + NO2 : 	KRO2NO3*1.60 	;
{2323.} 	 PROPALO2 = CH3CHOHCHO : 	2.00D-12*0.2*RO2 	;
{2324.} 	 PROPALO2 = MGLYOX : 	2.00D-12*0.2*RO2 	;
{2325.} 	 PROPALO2 = PROPALO : 	2.00D-12*0.6*RO2 	;
{2326.} 	 PROPALO2 + HO2 = PROPALOOH : 	KRO2HO2*0.520 	;
{2327.} 	 PROPALO2 + NO = PROPALO + NO2 : 	KRO2NO 	;
{2328.} 	 PROPALO2 + NO3 = PROPALO + NO2 : 	KRO2NO3 	;
{2329.} 	 IPRHOCO3 = IPRHOCO2H : 	1.00D-11*RO2*0.3 	;
{2330.} 	 IPRHOCO3 + HO2 = IPRHOCO2H + O3 : 	KAPHO2*0.29 	;
{2331.} 	 IPRHOCO3 = CH3COCH3 + HO2 : 	1.00D-11*RO2*0.7 	;
{2332.} 	 IPRHOCO3 + HO2 = IPRHOCO3H : 	KAPHO2*0.71 	;
{2333.} 	 IPRHOCO3 + NO2 = C4PAN5 : 	KFPAN 	;
{2334.} 	 IPRHOCO3 + NO = CH3COCH3 + HO2 + NO2 : 	KAPNO 	;
{2335.} 	 IPRHOCO3 + NO3 = CH3COCH3 + HO2 + NO2 : 	KRO2NO3*1.60 	;
{2336.} 	 CO3C4CO3 = CO3C4CO2H : 	1.00D-11*0.3*RO2 	;
{2337.} 	 CO3C4CO3 = MEKCO2 : 	1.00D-11*0.7*RO2 	;
{2338.} 	 CO3C4CO3 + NO2 = C5PAN16 : 	KFPAN 	;
{2339.} 	 CO3C4CO3 + HO2 = CO3C4CO2H + O3 : 	KAPHO2*0.29 	;
{2340.} 	 CO3C4CO3 + NO = MEKCO2 + NO2 : 	KAPNO 	;
{2341.} 	 CO3C4CO3 + HO2 = CO3C4CO3H : 	KAPHO2*0.71 	;
{2342.} 	 CO3C4CO3 + NO3 = MEKCO2 + NO2 : 	KRO2NO3*1.60 	;
{2343.} 	 HO3C4CO3 = HO3C4O2 : 	1.00D-11*RO2 	;
{2344.} 	 HO3C4CO3 + NO2 = C5PAN8 : 	KFPAN 	;
{2345.} 	 HO3C4CO3 + NO = HO3C4O2 + NO2 : 	KAPNO 	;
{2346.} 	 HO3C4CO3 + HO2 = HO3C4CO3H : 	KAPHO2 	;
{2347.} 	 HO3C4CO3 + NO3 = HO3C4O2 + NO2 : 	KRO2NO3*1.60 	;
{2348.} 	 C51O2 + NO = C51NO3 : 	KRO2NO*0.065 	;
{2349.} 	 C51O2 = C51O : 	8.40D-13*0.6*RO2 	;
{2350.} 	 C51O2 = HO1CO24C5 : 	8.40D-13*0.2*RO2 	;
{2351.} 	 C51O2 = C51OH : 	8.40D-13*0.2*RO2 	;
{2352.} 	 C51O2 + NO = C51O + NO2 : 	KRO2NO*0.935 	;
{2353.} 	 C51O2 + HO2 = C51OOH : 	KRO2HO2*0.706 	;
{2354.} 	 C51O2 + NO3 = C51O + NO2 : 	KRO2NO3 	;
{2355.} 	 OH + CO2C4CHO = CO2C4CO3 : 	2.63D-11 	;
{2356.} 	 CO2C4CHO = MEKAO2 + HO2 + CO : 	J(15) 	;
{2357.} 	 NO3 + CO2C4CHO = CO2C4CO3 + HNO3 : 	KNO3AL*5.5 	;
{2358.} 	 CO23C54O2 = CO23C54O : 	8.80D-13*RO2 	;
{2359.} 	 CO23C54O2 + NO = CO23C54O + NO2 : 	KRO2NO 	;
{2360.} 	 CO23C54O2 + HO2 = CO23C54OOH : 	KRO2HO2*0.706 	;
{2361.} 	 CO23C54O2 + NO3 = CO23C54O + NO2 : 	KRO2NO3 	;
{2362.} 	 HO2CO4C5O2 = HO2CO4C5O : 	2.00D-12*0.6*RO2 	;
{2363.} 	 HO2CO4C5O2 = HO2CO4CHO : 	2.00D-12*0.2*RO2 	;
{2364.} 	 HO2CO4C5O2 = HO14CO2C5 : 	2.00D-12*0.2*RO2 	;
{2365.} 	 HO2CO4C5O2 + NO = HO2CO4C5O + NO2 : 	KRO2NO 	;
{2366.} 	 HO2CO4C5O2 + HO2 = HOCO4C5OOH : 	KRO2HO2*0.706 	;
{2367.} 	 HO2CO4C5O2 + NO3 = HO2CO4C5O + NO2 : 	KRO2NO3 	;
{2368.} 	 CO24C53O2 = CO24C53O : 	8.80D-13*RO2 	;
{2369.} 	 CO24C53O2 + HO2 = CO24C53OOH : 	KRO2HO2*0.706 	;
{2370.} 	 CO24C53O2 + NO = CO24C53O + NO2 : 	KRO2NO 	;
{2371.} 	 CO24C53O2 + NO3 = CO24C53O + NO2 : 	KRO2NO3 	;
{2372.} 	 HO2C4CO3 = HO2C4CO2H : 	1.00D-11*0.3*RO2 	;
{2373.} 	 HO2C4CO3 = HO2C4O2 : 	1.00D-11*0.7*RO2 	;
{2374.} 	 HO2C4CO3 + NO2 = C5PAN1 : 	KFPAN 	;
{2375.} 	 HO2C4CO3 + HO2 = HO2C4CO3H : 	KAPHO2*0.71 	;
{2376.} 	 HO2C4CO3 + HO2 = HO2C4CO2H + O3 : 	KAPHO2*0.29 	;
{2377.} 	 HO2C4CO3 + NO = HO2C4O2 + NO2 : 	KAPNO 	;
{2378.} 	 HO2C4CO3 + NO3 = HO2C4O2 + NO2 : 	KRO2NO3*1.60 	;
{2379.} 	 HO2C4O2 = HO2C4O : 	1.30D-12*0.6*RO2 	;
{2380.} 	 HO2C4O2 + NO = HO2C4NO3 : 	KRO2NO*0.033 	;
{2381.} 	 HO2C4O2 = HO2C4OH : 	1.30D-12*0.2*RO2 	;
{2382.} 	 HO2C4O2 = HO2C3CHO : 	1.30D-12*0.2*RO2 	;
{2383.} 	 HO2C4O2 + HO2 = HO2C4OOH : 	KRO2HO2*0.625 	;
{2384.} 	 HO2C4O2 + NO = HO2C4O + NO2 : 	KRO2NO*0.967 	;
{2385.} 	 HO2C4O2 + NO3 = HO2C4O + NO2 : 	KRO2NO3 	;
{2386.} 	 HOCO3C54O2 = HOCO3C54O : 	8.80D-13*0.6*RO2 	;
{2387.} 	 HOCO3C54O2 = HO1CO34C5 : 	8.80D-13*0.2*RO2 	;
{2388.} 	 HOCO3C54O2 = HO14CO3C5 : 	8.80D-13*0.2*RO2 	;
{2389.} 	 HOCO3C54O2 + NO = HOCO3C54O + NO2 : 	KRO2NO 	;
{2390.} 	 HOCO3C54O2 + HO2 = HOCO3C5OOH : 	KRO2HO2*0.706 	;
{2391.} 	 HOCO3C54O2 + NO3 = HOCO3C54O + NO2 : 	KRO2NO3 	;
{2392.} 	 HO13C5O2 + NO = HO13C5NO3 : 	KRO2NO*0.026 	;
{2393.} 	 HO13C5O2 = HO13C5O : 	8.40D-13*0.6*RO2 	;
{2394.} 	 HO13C5O2 = HO13CO4C5 : 	8.40D-13*0.2*RO2 	;
{2395.} 	 HO13C5O2 = HO134C5 : 	8.40D-13*0.2*RO2 	;
{2396.} 	 HO13C5O2 + NO = HO13C5O + NO2 : 	KRO2NO*0.974 	;
{2397.} 	 HO13C5O2 + HO2 = HO13C5OOH : 	KRO2HO2*0.706 	;
{2398.} 	 HO13C5O2 + NO3 = HO13C5O + NO2 : 	KRO2NO3 	;
{2399.} 	 OH + HOBUT2CHO = HOBUT2CO3 : 	3.09D-11 	;
{2400.} 	 HOBUT2CHO = NBUTOLBO2 + HO2 + CO : 	J(17) 	;
{2401.} 	 NO3 + HOBUT2CHO = HOBUT2CO3 + HNO3 : 	KNO3AL*8.5 	;
{2402.} 	 HOIBUTCO3 = SC4H9O2 : 	1.00D-11*RO2 	;
{2403.} 	 HOIBUTCO3 + NO = IBUTOLCO2 + NO2 : 	KAPNO 	;
{2404.} 	 HOIBUTCO3 + NO2 = C5PAN3 : 	KFPAN 	;
{2405.} 	 HOIBUTCO3 + HO2 = HOIBUTCO3H : 	KAPHO2 	;
{2406.} 	 HOIBUTCO3 + NO3 = IBUTOLCO2 + NO2 : 	KRO2NO3*1.60 	;
{2407.} 	 HO2C43CO3 = HO2C43CO2H : 	1.00D-11*0.3*RO2 	;
{2408.} 	 HO2C43CO3 = BUT2OLO2 : 	1.00D-11*0.7*RO2 	;
{2409.} 	 HO2C43CO3 + HO2 = HO2C43CO3H : 	KAPHO2*0.71 	;
{2410.} 	 HO2C43CO3 + NO2 = C5PAN14 : 	KFPAN 	;
{2411.} 	 HO2C43CO3 + NO = BUT2OLO2 + NO2 : 	KAPNO 	;
{2412.} 	 HO2C43CO3 + HO2 = HO2C43CO2H + O3 : 	KAPHO2*0.29 	;
{2413.} 	 HO2C43CO3 + NO3 = BUT2OLO2 + NO2 : 	KRO2NO3*1.60 	;
{2414.} 	 C56O2 + NO = C56NO3 : 	KRO2NO*0.010 	;
{2415.} 	 C56O2 = C56O : 	2.00D-12*0.6*RO2 	;
{2416.} 	 C56O2 = C42CHO : 	2.00D-12*0.2*RO2 	;
{2417.} 	 C56O2 = C56OH : 	2.00D-12*0.2*RO2 	;
{2418.} 	 C56O2 + NO = C56O + NO2 : 	KRO2NO*0.990 	;
{2419.} 	 C56O2 + HO2 = C56OOH : 	KRO2HO2*0.706 	;
{2420.} 	 C56O2 + NO3 = C56O + NO2 : 	KRO2NO3 	;
{2421.} 	 C53O2 = C53O : 	2.00D-12*0.6*RO2 	;
{2422.} 	 C53O2 = HOIPRGLYOX : 	2.00D-12*0.2*RO2 	;
{2423.} 	 C53O2 = C53OH : 	2.00D-12*0.2*RO2 	;
{2424.} 	 C53O2 + NO = C53O + NO2 : 	KRO2NO 	;
{2425.} 	 C53O2 + HO2 = C53OOH : 	KRO2HO2*0.706 	;
{2426.} 	 C53O2 + NO3 = C53O + NO2 : 	KRO2NO3 	;
{2427.} 	 C41CO3 = C41CO2H : 	1.00D-11*0.3*RO2 	;
{2428.} 	 C41CO3 = MEKBO2 : 	1.00D-11*0.7*RO2 	;
{2429.} 	 C41CO3 + HO2 = C41CO2H + O3 : 	KAPHO2*0.29 	;
{2430.} 	 C41CO3 + HO2 = C41CO3H : 	KAPHO2*0.71 	;
{2431.} 	 C41CO3 + NO2 = C5PAN7 : 	KFPAN 	;
{2432.} 	 C41CO3 + NO = MEKBO2 + NO2 : 	KAPNO 	;
{2433.} 	 C41CO3 + NO3 = MEKBO2 + NO2 : 	KRO2NO3*1.60 	;
{2434.} 	 PROL1MCO3 + NO2 = PROL1MPAN : 	KFPAN 	;
{2435.} 	 PROL1MCO3 + HO2 = PROL1MCO3H : 	KAPHO2 	;
{2436.} 	 PROL1MCO3 = MEK + HO2 : 	1.00D-11*RO2 	;
{2437.} 	 PROL1MCO3 + NO = MEK + HO2 + NO2 : 	KAPNO 	;
{2438.} 	 PROL1MCO3 + NO3 = MEK + HO2 + NO2 : 	KRO2NO3*1.60 	;
{2439.} 	 H2M2C3CO3 = TBUTOLO2 : 	1.00D-11*RO2 	;
{2440.} 	 H2M2C3CO3 + HO2 = H2M2C3CO3H : 	KAPHO2 	;
{2441.} 	 H2M2C3CO3 + NO2 = C5PAN11 : 	KFPAN 	;
{2442.} 	 H2M2C3CO3 + NO = TBUTOLO2 + NO2 : 	KAPNO 	;
{2443.} 	 H2M2C3CO3 + NO3 = TBUTOLO2 + NO2 : 	KRO2NO3*1.60 	;
{2444.} 	 C54O2 + NO = C54NO3 : 	KRO2NO*0.010 	;
{2445.} 	 C54O2 = C54O : 	2.00D-12*0.6*RO2 	;
{2446.} 	 C54O2 = H13C43CHO : 	2.00D-12*0.2*RO2 	;
{2447.} 	 C54O2 = C54OH : 	2.00D-12*0.2*RO2 	;
{2448.} 	 C54O2 + NO = C54O + NO2 : 	KRO2NO*0.990 	;
{2449.} 	 C54O2 + HO2 = C54OOH : 	KRO2HO2*0.706 	;
{2450.} 	 C54O2 + NO3 = C54O + NO2 : 	KRO2NO3 	;
{2451.} 	 C63O2 + NO = C63NO3 : 	KRO2NO*0.039 	;
{2452.} 	 C63O2 = C63O : 	8.40D-13*0.6*RO2 	;
{2453.} 	 C63O2 = C63OH : 	8.40D-13*0.2*RO2 	;
{2454.} 	 C63O2 = HO1CO24C6 : 	8.40D-13*0.2*RO2 	;
{2455.} 	 C63O2 + NO = C63O + NO2 : 	KRO2NO*0.961 	;
{2456.} 	 C63O2 + HO2 = C63OOH : 	KRO2HO2*0.770 	;
{2457.} 	 C63O2 + NO3 = C63O + NO2 : 	KRO2NO3 	;
{2458.} 	 OH + CO3C5CHO = CO3C5CO3 : 	2.75D-11 	;
{2459.} 	 CO3C5CHO = DIEKBO2 + HO2 + CO : 	J(15) 	;
{2460.} 	 NO3 + CO3C5CHO = CO3C5CO3 + HNO3 : 	KNO3AL*5.5 	;
{2461.} 	 CO2HOC61O2 = CO2HOC61O : 	2.00D-12*RO2 	;
{2462.} 	 CO2HOC61O2 + NO = CO2HOC61O + NO2 : 	KRO2NO 	;
{2463.} 	 CO2HOC61O2 + HO2 = CO2HOC6OOH : 	KRO2HO2*0.770 	;
{2464.} 	 CO2HOC61O2 + NO3 = CO2HOC61O + NO2 : 	KRO2NO3 	;
{2465.} 	 CO24C6O2 = CO24C6O : 	8.80D-13*RO2 	;
{2466.} 	 CO24C6O2 + NO = CO24C6O + NO2 : 	KRO2NO 	;
{2467.} 	 CO24C6O2 + HO2 = CO24C6OOH : 	KRO2HO2*0.770 	;
{2468.} 	 CO24C6O2 + NO3 = CO24C6O + NO2 : 	KRO2NO3 	;
{2469.} 	 CO25C6O2 = CO25C6O : 	8.40D-13*0.6*RO2 	;
{2470.} 	 CO25C6O2 = CO25C6OH : 	8.40D-13*0.2*RO2 	;
{2471.} 	 CO25C6O2 = CO235C6 : 	8.40D-13*0.2*RO2 	;
{2472.} 	 CO25C6O2 + NO = CO25C6O + NO2 : 	KRO2NO 	;
{2473.} 	 CO25C6O2 + HO2 = CO25C6OOH : 	KRO2HO2*0.770 	;
{2474.} 	 CO25C6O2 + NO3 = CO25C6O + NO2 : 	KRO2NO3 	;
{2475.} 	 C61O2 + NO = C61NO3 : 	KRO2NO*0.098 	;
{2476.} 	 C61O2 = C61O : 	8.40D-13*0.6*RO2 	;
{2477.} 	 C61O2 = C61CO : 	8.40D-13*0.2*RO2 	;
{2478.} 	 C61O2 = C61OH : 	8.40D-13*0.2*RO2 	;
{2479.} 	 C61O2 + NO = C61O + NO2 : 	KRO2NO*0.902 	;
{2480.} 	 C61O2 + HO2 = C61OOH : 	KRO2HO2*0.770 	;
{2481.} 	 C61O2 + NO3 = C61O + NO2 : 	KRO2NO3 	;
{2482.} 	 CO23C65O2 = CO23C65O : 	8.80D-13*RO2 	;
{2483.} 	 CO23C65O2 + NO = CO23C65O + NO2 : 	KRO2NO 	;
{2484.} 	 CO23C65O2 + HO2 = CO23C65OOH : 	KRO2HO2*0.770 	;
{2485.} 	 CO23C65O2 + NO3 = CO23C65O + NO2 : 	KRO2NO3 	;
{2486.} 	 HO3C5CO3 = HO3C5CO2H : 	1.00D-11*0.3*RO2 	;
{2487.} 	 HO3C5CO3 = HO3C5O2 : 	1.00D-11*0.7*RO2 	;
{2488.} 	 HO3C5CO3 + NO2 = C6PAN1 : 	KFPAN 	;
{2489.} 	 HO3C5CO3 + HO2 = HO3C5CO3H : 	KAPHO2*0.71 	;
{2490.} 	 HO3C5CO3 + HO2 = HO3C5CO2H + O3 : 	KAPHO2*0.29 	;
{2491.} 	 HO3C5CO3 + NO = HO3C5O2 + NO2 : 	KAPNO 	;
{2492.} 	 HO3C5CO3 + NO3 = HO3C5O2 + NO2 : 	KRO2NO3*1.60 	;
{2493.} 	 C6HO1CO3O2 = C6HO1CO3O : 	8.80D-13*0.6*RO2 	;
{2494.} 	 C6HO1CO3O2 = C6CO34HO1 : 	8.80D-13*0.2*RO2 	;
{2495.} 	 C6HO1CO3O2 = C6CO3HO14 : 	8.80D-13*0.2*RO2 	;
{2496.} 	 C6HO1CO3O2 + NO = C6HO1CO3O + NO2 : 	KRO2NO 	;
{2497.} 	 C6HO1CO3O2 + HO2 = C6HOCOOOH : 	KRO2HO2*0.770 	;
{2498.} 	 C6HO1CO3O2 + NO3 = C6HO1CO3O + NO2 : 	KRO2NO3 	;
{2499.} 	 C3COCCO3 = PEN2ONE1O2 : 	1.00D-11*RO2 	;
{2500.} 	 C3COCCO3 + NO = PEN2ONE1O2 + NO2 : 	KAPNO 	;
{2501.} 	 C3COCCO3 + NO2 = C3COCPAN : 	KFPAN 	;
{2502.} 	 C3COCCO3 + HO2 = C3COCCO3H : 	KAPHO2 	;
{2503.} 	 C3COCCO3 + NO3 = PEN2ONE1O2 + NO2 : 	KRO2NO3*1.60 	;
{2504.} 	 PEN2ONE1O2 = PEN2ONE1O : 	2.00D-12*RO2 	;
{2505.} 	 PEN2ONE1O2 + HO2 = PE2ONE1OOH : 	KRO2HO2*0.706 	;
{2506.} 	 PEN2ONE1O2 + NO = PEN2ONE1O + NO2 : 	KRO2NO 	;
{2507.} 	 PEN2ONE1O2 + NO3 = PEN2ONE1O + NO2 : 	KRO2NO3 	;
{2508.} 	 C6CO34O2 = C6CO34O : 	8.80D-13*RO2 	;
{2509.} 	 C6CO34O2 + NO = C6CO34O + NO2 : 	KRO2NO 	;
{2510.} 	 C6CO34O2 + HO2 = C6CO34OOH : 	KRO2HO2*0.770 	;
{2511.} 	 C6CO34O2 + NO3 = C6CO34O + NO2 : 	KRO2NO3 	;
{2512.} 	 C6CO3OH5O2 = C6CO3OH5O : 	8.80D-13*0.6*RO2 	;
{2513.} 	 C6CO3OH5O2 = C6CO23HO5 : 	8.80D-13*0.2*RO2 	;
{2514.} 	 C6CO3OH5O2 = C6CO3HO25 : 	8.80D-13*0.2*RO2 	;
{2515.} 	 C6CO3OH5O2 + NO = C6CO3OH5O + NO2 : 	KRO2NO 	;
{2516.} 	 C6CO3OH5O2 + HO2 = C6CO3OHOOH : 	KRO2HO2*0.770 	;
{2517.} 	 C6CO3OH5O2 + NO3 = C6CO3OH5O + NO2 : 	KRO2NO3 	;
{2518.} 	 BIACETO = CH3CO3 + HCHO + CO : 	KDEC 	;
{2519.} 	 HO2CO3C4O = HCHO + CH3CHOHCO3 : 	KDEC 	;
{2520.} 	 BZFUO = CO14O3CHO + HO2 : 	KDEC 	;
{2521.} 	 BZFUOH + OH = BZFUCO + HO2 : 	2.78D-11 	;
{2522.} 	 BZFUCO + OH = CO14O3CHO + HO2 : 	1.78D-11 	;
{2523.} 	 BZFUOOH = BZFUO + OH : 	J(41) 	;
{2524.} 	 BZFUOOH + OH = BZFUO2 : 	3.68D-11 	;
{2525.} 	 BZFUONOO + CO = CO14O3CHO : 	1.20D-15 	;
{2526.} 	 BZFUONOO = CO14O3CO2H : 	1.00D-17*H2O 	;
{2527.} 	 BZFUONOO + NO = CO14O3CHO + NO2 : 	1.00D-14 	;
{2528.} 	 BZFUONOO = CO14O3CHO + H2O2 : 	6.00D-18*H2O 	;
{2529.} 	 BZFUONOO + SO2 = CO14O3CHO + SO3 : 	7.00D-14 	;
{2530.} 	 BZFUONOO + NO2 = CO14O3CHO + NO3 : 	1.00D-15 	;
{2531.} 	 NBZFUO = CO14O3CHO + NO2 : 	KDEC*0.5 	;
{2532.} 	 NBZFUO = NBZFUONE + HO2 : 	KDEC*0.5 	;
{2533.} 	 NBZFUOOH = NBZFUO + OH : 	J(41) 	;
{2534.} 	 NBZFUOOH + OH = NBZFUO2 : 	6.18D-12 	;
{2535.} 	 MALANHY + OH = MALANHYO2 : 	1.50D-12 	;
{2536.} 	 HCOCOHCO3H + OH = HCOCOHCO3 : 	7.33D-11 	;
{2537.} 	 HCOCOHCO3H = GLYOX + HO2 + OH : 	J(41) 	;
{2538.} 	 HCOCOHPAN = HCOCOHCO3 + NO2 : 	KBPAN 	;
{2539.} 	 HCOCOHPAN + OH = GLYOX + CO + NO2 : 	6.97D-11 	;
{2540.} 	 CO2C4DIAL + OH = CO + CO + CO + CO + HO2 : 	2.45D-11 	;
{2541.} 	 CO2C4DIAL = CO + CO + HO2 + HO2 + CO + CO : 	J(34)*2 	;
{2542.} 	 NPHEN1O2 = NPHEN1O : 	2.50D-13*RO2 	;
{2543.} 	 NPHEN1O2 + NO = NPHEN1O + NO2 : 	KRO2NO 	;
{2544.} 	 NPHEN1O2 + HO2 = NPHEN1OOH : 	KRO2HO2*0.770 	;
{2545.} 	 NPHEN1O2 + NO3 = NPHEN1O + NO2 : 	KRO2NO3 	;
{2546.} 	 DNPHEN + OH = DNPHENO2 : 	3.00D-14 	;
{2547.} 	 DNPHEN + NO3 = NDNPHENO2 : 	2.25D-15 	;
{2548.} 	 PBZQO2 = PBZQO : 	8.80D-13*RO2*0.6 	;
{2549.} 	 PBZQO2 = PBZQOH : 	8.80D-13*RO2*0.2 	;
{2550.} 	 PBZQO2 = PBZQCO : 	8.80D-13*RO2*0.2 	;
{2551.} 	 PBZQO2 + NO = PBZQO + NO2 : 	KRO2NO 	;
{2552.} 	 PBZQO2 + HO2 = PBZQOOH : 	KRO2HO2*0.770 	;
{2553.} 	 PBZQO2 + NO3 = PBZQO + NO2 : 	KRO2NO3 	;
{2554.} 	 NBZQO2 = NBZQO : 	8.80D-13*RO2 	;
{2555.} 	 NBZQO2 + NO = NBZQO + NO2 : 	KRO2NO 	;
{2556.} 	 NBZQO2 + HO2 = NBZQOOH : 	KRO2HO2*0.770 	;
{2557.} 	 NBZQO2 + NO3 = NBZQO + NO2 : 	KRO2NO3 	;
{2558.} 	 CATEC1OOH = CATEC1O + OH : 	J(41) 	;
{2559.} 	 CATEC1OOH + OH = CATEC1O2 : 	1.90D-12*EXP(190/TEMP) 	;
{2560.} 	 NCATECO2 = NCATECO : 	8.00D-13*RO2 	;
{2561.} 	 NCATECO2 + NO = NCATECO + NO2 : 	KRO2NO 	;
{2562.} 	 NCATECO2 + HO2 = NCATECOOH : 	KRO2HO2*0.770 	;
{2563.} 	 NCATECO2 + NO3 = NCATECO + NO2 : 	KRO2NO3 	;
{2564.} 	 NNCATECO2 = NNCATECO : 	8.00D-13*RO2 	;
{2565.} 	 NNCATECO2 + NO = NNCATECO + NO2 : 	KRO2NO 	;
{2566.} 	 NNCATECO2 + HO2 = NNCATECOOH : 	KRO2HO2*0.770 	;
{2567.} 	 NNCATECO2 + NO3 = NNCATECO + NO2 : 	KRO2NO3 	;
{2568.} 	 TLFUO = ACCOMECHO + HO2 : 	KDEC 	;
{2569.} 	 TLFUOH + OH = TLFUO : 	2.19D-11 	;
{2570.} 	 TLFUOOH = TLFUO + OH : 	J(41) 	;
{2571.} 	 TLFUOOH + OH = TLFUO2 : 	2.53D-11 	;
{2572.} 	 TLFUONOO + CO = ACCOMECHO : 	1.20D-15 	;
{2573.} 	 TLFUONOO = C24O3CCO2H : 	1.00D-17*H2O 	;
{2574.} 	 TLFUONOO + NO = ACCOMECHO + NO2 : 	1.00D-14 	;
{2575.} 	 TLFUONOO = ACCOMECHO + H2O2 : 	6.00D-18*H2O 	;
{2576.} 	 TLFUONOO + SO2 = ACCOMECHO + SO3 : 	7.00D-14 	;
{2577.} 	 TLFUONOO + NO2 = ACCOMECHO + NO3 : 	1.00D-15 	;
{2578.} 	 MECOACETO2 = MECOACETO : 	2.00D-12*RO2 	;
{2579.} 	 MECOACETO2 + HO2 = MECOACEOOH : 	KRO2HO2*0.625 	;
{2580.} 	 MECOACETO2 + NO = MECOACETO + NO2 : 	KRO2NO 	;
{2581.} 	 MECOACETO2 + NO3 = MECOACETO + NO2 : 	KRO2NO3 	;
{2582.} 	 NTLFUO = ACCOMECHO + NO2 : 	KDEC 	;
{2583.} 	 NTLFUOOH = NTLFUO + OH : 	J(41) 	;
{2584.} 	 NTLFUOOH + OH = NTLFUO2 : 	4.44D-12 	;
{2585.} 	 C5DICARBO = MGLYOX + GLYOX + HO2 : 	KDEC 	;
{2586.} 	 C5134CO2OH + OH = C54CO + HO2 : 	7.48D-11 	;
{2587.} 	 C5134CO2OH = CO23C3CHO + HO2 + CO + HO2 : 	J(35)+J(15) 	;
{2588.} 	 C514CO23OH + OH = C5134CO2OH + HO2 : 	6.26D-11 	;
{2589.} 	 C514CO23OH = CO2H3CHO + HO2 + CO + HO2 : 	J(15)+J(22) 	;
{2590.} 	 C5DICAROOH = C5DICARBO + OH : 	J(41)+J(15)+J(22) 	;
{2591.} 	 C5DICAROOH + OH = C5DICARBO2 : 	1.90D-12*EXP(190/TEMP) 	;
{2592.} 	 C5DICAROOH + OH = C5134CO2OH + OH : 	1.21D-10 	;
{2593.} 	 MC3ODBCO2H + OH = MC3CODBCO2 : 	4.38D-11 	;
{2594.} 	 MC3ODBCO2H = CH3COCO2H + HO2 + CO + HO2 + CO : 	J(18)+J(19) 	;
{2595.} 	 MC3CODBCO2 = GLYOX + CH3O2 + CO : 	KDEC*0.35 	;
{2596.} 	 MC3CODBCO2 = MMALANHY + HO2 : 	KDEC*0.65 	;
{2597.} 	 MC3ODBCO3H = MC3CODBCO2 + OH : 	J(41) 	;
{2598.} 	 MC3ODBCO3H + OH = MC3CODBCO3 : 	4.73D-11 	;
{2599.} 	 MC3ODBCO3H = CH3COCO3H + HO2 + CO + HO2 + CO : 	J(18)+J(19) 	;
{2600.} 	 MC3CODBPAN = MC3CODBCO3 + NO2 : 	KBPAN 	;
{2601.} 	 MC3CODBPAN + OH = GLYOX + HCHO + CO + NO2 : 	4.37D-11 	;
{2602.} 	 PXYFUO2 = PXYFUO : 	9.20D-14*RO2*0.70 	;
{2603.} 	 PXYFUO2 = PXYFUOH : 	9.20D-14*RO2*0.30 	;
{2604.} 	 PXYFUO2 + NO = PXYFUO + NO2 : 	KRO2NO 	;
{2605.} 	 PXYFUO2 + HO2 = PXYFUOOH : 	KRO2HO2*0.706 	;
{2606.} 	 PXYFUO2 + NO3 = PXYFUO + NO2 : 	KRO2NO3 	;
{2607.} 	 MCOCOMOXO2 = MCOCOMOXO : 	2.00D-12*RO2 	;
{2608.} 	 MCOCOMOXO2 + HO2 = MCOCOMOOOH : 	KRO2HO2*0.625 	;
{2609.} 	 MCOCOMOXO2 + NO = MCOCOMOXO + NO2 : 	KRO2NO 	;
{2610.} 	 MCOCOMOXO2 + NO3 = MCOCOMOXO + NO2 : 	KRO2NO3 	;
{2611.} 	 NPXYFUO2 = NPXYFUO : 	9.20D-14*RO2 	;
{2612.} 	 NPXYFUO2 + NO = NPXYFUO + NO2 : 	KRO2NO 	;
{2613.} 	 NPXYFUO2 + HO2 = NPXYFUOOH : 	KRO2HO2*0.706 	;
{2614.} 	 NPXYFUO2 + NO3 = NPXYFUO + NO2 : 	KRO2NO3 	;
{2615.} 	 C4M2ALOHO = GLYOX + MGLYOX + HO2 : 	KDEC 	;
{2616.} 	 C4M2AL2OH + OH = C4M2ALOHO : 	5.70D-11 	;
{2617.} 	 C4M2AL2OH = CO2H3CHO + HO2 + CO + HO2 : 	J(17)*2 	;
{2618.} 	 C4MALOHOOH = C4M2ALOHO + OH : 	J(41) 	;
{2619.} 	 C4MALOHOOH + OH = C4M2ALOHO2 : 	4.58D-11 	;
{2620.} 	 C4MALOHOOH = CO2H3CHO + HO2 + CO + OH : 	J(17)*2 	;
{2621.} 	 C3MCODBCO2 = MGLYOX + HO2 + CO : 	KDEC*0.35 	;
{2622.} 	 C3MCODBCO2 = MMALANHY + HO2 : 	KDEC*0.65 	;
{2623.} 	 C4CODBCO3H = C3MCODBCO2 + OH : 	J(41) 	;
{2624.} 	 C4CODBCO3H + OH = C3MCODBCO3 : 	4.73D-11 	;
{2625.} 	 C4CODBCO3H = HCOCO3H + HO2 + CO + CH3CO3 : 	J(18)+J(19) 	;
{2626.} 	 C3MCODBPAN = C3MCODBCO3 + NO2 : 	KBPAN 	;
{2627.} 	 C3MCODBPAN + OH = MGLYOX + CO + CO + NO2 : 	4.37D-11 	;
{2628.} 	 NCRES1O2 = NCRES1O : 	2.50D-13*RO2 	;
{2629.} 	 NCRES1O2 + NO = NCRES1O + NO2 : 	KRO2NO 	;
{2630.} 	 NCRES1O2 + HO2 = NCRES1OOH : 	KRO2HO2*0.820 	;
{2631.} 	 NCRES1O2 + NO3 = NCRES1O + NO2 : 	KRO2NO3 	;
{2632.} 	 DNCRES + OH = DNCRESO2 : 	5.10D-14 	;
{2633.} 	 DNCRES + NO3 = NDNCRESO2 : 	7.83D-15 	;
{2634.} 	 PTLQO2 = PTLQO : 	8.80D-13*RO2*0.6 	;
{2635.} 	 PTLQO2 = PTLQOH : 	8.80D-13*RO2*0.2 	;
{2636.} 	 PTLQO2 = PTLQCO : 	8.80D-13*RO2*0.2 	;
{2637.} 	 PTLQO2 + NO = PTLQO + NO2 : 	KRO2NO 	;
{2638.} 	 PTLQO2 + HO2 = PTLQOOH : 	KRO2HO2*0.820 	;
{2639.} 	 PTLQO2 + NO3 = PTLQO + NO2 : 	KRO2NO3 	;
{2640.} 	 NPTLQO2 = NPTLQO : 	8.80D-13*RO2 	;
{2641.} 	 NPTLQO2 + NO = NPTLQO + NO2 : 	KRO2NO 	;
{2642.} 	 NPTLQO2 + HO2 = NPTLQOOH : 	KRO2HO2*0.820 	;
{2643.} 	 NPTLQO2 + NO3 = NPTLQO + NO2 : 	KRO2NO3 	;
{2644.} 	 MCATEC1OOH = MCATEC1O + OH : 	J(41) 	;
{2645.} 	 MCATEC1OOH + OH = MCATEC1O2 : 	2.05D-10 	;
{2646.} 	 MNCATECO2 = MNCATECO : 	8.00D-13*RO2 	;
{2647.} 	 MNCATECO2 + NO = MNCATECO + NO2 : 	KRO2NO 	;
{2648.} 	 MNCATECO2 + HO2 = MNCATECOOH : 	KRO2HO2*0.820 	;
{2649.} 	 MNCATECO2 + NO3 = MNCATECO + NO2 : 	KRO2NO3 	;
{2650.} 	 MNNCATECO2 = MNNCATECO : 	8.00D-13*RO2 	;
{2651.} 	 MNNCATECO2 + NO = MNNCATECO + NO2 : 	KRO2NO 	;
{2652.} 	 MNNCATECO2 + HO2 = MNNCATCOOH : 	KRO2HO2*0.820 	;
{2653.} 	 MNNCATECO2 + NO3 = MNNCATECO + NO2 : 	KRO2NO3 	;
{2654.} 	 MVKOHBO = HOCH2CHO + HOCH2CO3 : 	KDEC 	;
{2655.} 	 MVKOHAOH + OH = H13CO2CHO + HO2 : 	2.10D-11 	;
{2656.} 	 MVKOHAOH = HOCH2CO3 + HOCH2CHO + HO2 : 	J(22) 	;
{2657.} 	 H14CO23C4 + OH = H1CO23CHO + HO2 : 	4.44D-12 	;
{2658.} 	 H14CO23C4 = HOCH2CO3 + HOCH2CO3 : 	J(35) 	;
{2659.} 	 MVKOHBOOH + OH = H14CO23C4 + OH : 	4.39D-12 	;
{2660.} 	 MVKOHBOOH = MVKOHBO + OH : 	J(41) 	;
{2661.} 	 MVKOHBOOH = HOCH2CHO + HOCH2CO3 + OH : 	J(22) 	;
{2662.} 	 MVKOHANO3 + OH = H13CO2CHO + NO2 : 	4.37D-12 	;
{2663.} 	 MVKOHAO = HOCH2COCHO + HCHO + HO2 : 	KDEC 	;
{2664.} 	 OH + H13CO2CHO = H13CO2CO3 : 	2.66D-11 	;
{2665.} 	 NO3 + H13CO2CHO = H13CO2CO3 + HNO3 : 	KNO3AL*4.0 	;
{2666.} 	 H13CO2CHO = HOCH2CHO + CO + HO2 + HO2 : 	J(15) 	;
{2667.} 	 MVKOHAOOH + OH = H13CO2CHO + OH : 	5.98D-11 	;
{2668.} 	 MVKOHAOOH = MVKOHAO + OH : 	J(41)+J(22) 	;
{2669.} 	 ACR + OH = ACO3B : 	0.065*2.00E-11 	;
{2670.} 	 ACR + OH = ACO3 : 	0.68*2.00E-11 	;
{2671.} 	 ACR = ACO3 : 	0.3*J(18) 	;
{2672.} 	 ACR + OH = OCCOHCO2 : 	0.255*2.00E-11 	;
{2673.} 	 ACR = C2H4 + CO : 	0.4*J(18) 	;
{2674.} 	 ACR = HCHO + HO2 + CO : 	0.3*J(18) 	;
{2675.} 	 O3 + ACR = CH2OOB + GLYOX : 	0.5*2.9E-19 	;
{2676.} 	 O3 + ACR = GLYOOB + HCHO : 	0.5*2.9E-19 	;
{2677.} 	 ACR + NO3 = ACO3 + HNO3 : 	1.72D-13*EXP(-1190/TEMP) 	;
{2678.} 	 HMGLOO + CO = HOCH2COCHO : 	1.20D-15 	;
{2679.} 	 HMGLOO = HOCH2COCO2H : 	1.00D-17*H2O 	;
{2680.} 	 HMGLOO + NO = HOCH2COCHO + NO2 : 	1.00D-14 	;
{2681.} 	 HMGLOO = HOCH2COCHO + H2O2 : 	6.00D-18*H2O 	;
{2682.} 	 HMGLOO + SO2 = HOCH2COCHO + SO3 : 	7.00D-14 	;
{2683.} 	 HMGLOO + NO2 = HOCH2COCHO + NO3 : 	1.00D-15 	;
{2684.} 	 OH + CO2H3CO3H = CO2H3CO3 : 	7.34D-12 	;
{2685.} 	 CO2H3CO3H = MGLYOX + HO2 + OH : 	J(41) 	;
{2686.} 	 CO2H3CO3H = CH3CO3 + HO2 + HCOCO3H : 	J(22) 	;
{2687.} 	 C4PAN6 = CO2H3CO3 + NO2 : 	KBPAN 	;
{2688.} 	 OH + C4PAN6 = MGLYOX + CO + NO2 : 	3.74D-12 	;
{2689.} 	 OH + ACO2H = HO2 + CO + HCHO : 	8.66D-12 	;
{2690.} 	 OH + ACO3H = ACO3 : 	1.22D-11 	;
{2691.} 	 ACO3H = HO2 + CO + HCHO + OH : 	J(41) 	;
{2692.} 	 ACRPAN = ACO3 + NO2 : 	KBPAN 	;
{2693.} 	 OH + ACRPAN = HOCH2CHO + CO + NO2 : 	8.63D-12 	;
{2694.} 	 ACRPAN + OH = GLYPAN + HCHO : 	1.6E-11 	;
{2695.} 	 ACRPAN + OH = HOCH2CHO + CO + NO2 : 	1.6E-11 	;
{2696.} 	 CHOMOHPAN = CHOMOHCO3 + NO2 : 	KBPAN 	;
{2697.} 	 CHOMOHPAN + OH = MGLYOX + CO + NO2 : 	6.64D-11 	;
{2698.} 	 CHOMOHCO3H + OH = CHOMOHCO3 : 	6.99D-11 	;
{2699.} 	 CHOMOHCO3H = MGLYOX + OH + HO2 : 	J(41)+J(17) 	;
{2700.} 	 CH3SO2 = CH3SO2O2 : 	1.03D-16*EXP(1580/TEMP)*O2 	;
{2701.} 	 CH3SO2 + O3 = CH3SO3 : 	3.00D-13 	;
{2702.} 	 CH3SO2 = CH3O2 + SO2 : 	5.00D+13*EXP(-9673/TEMP) 	;
{2703.} 	 CH3SOO2 = MSIA : 	1.00D-11*RO2*0.3 	;
{2704.} 	 CH3SOO2 = CH3SO2 : 	1.00D-11*RO2*0.7 	;
{2705.} 	 CH3SOO2 = CH3SO : 	9.10D+10*EXP(-3560/TEMP) 	;
{2706.} 	 CH3SOO2 + NO = CH3SO2 + NO2 : 	1.00D-11 	;
{2707.} 	 CH3SOO2 + HO2 = CH3SOOOH : 	KAPHO2*0.71 	;
{2708.} 	 CH3SOO2 + HO2 = MSIA + O3 : 	KAPHO2*0.29 	;
{2709.} 	 CH3SOO2 + NO2 = CH3SOO2NO2 : 	1.20D-12*(TEMP/300)**-0.9 	;
{2710.} 	 CH3SOO2 + NO3 = CH3SO2 + NO2 : 	KRO2NO3*1.6 	;
{2711.} 	 OH + HOC2H4CO2H = HOCH2CH2O2 : 	1.39D-11 	;
{2712.} 	 C3PAN1 = HOC2H4CO3 + NO2 : 	KBPAN 	;
{2713.} 	 OH + C3PAN1 = HOCH2CHO + CO + NO2 : 	4.51D-12 	;
{2714.} 	 OH + HOC2H4CO3H = HOC2H4CO3 : 	1.73D-11 	;
{2715.} 	 HOC2H4CO3H = HOCH2CH2O2 + OH : 	J(41) 	;
{2716.} 	 HCOCH2OOH = HCOCH2O + OH : 	J(41) 	;
{2717.} 	 HCOCH2OOH + OH = HCOCH2O2 : 	1.90D-12*EXP(190/TEMP) 	;
{2718.} 	 HCOCH2OOH + OH = GLYOX + OH : 	2.91D-11 	;
{2719.} 	 HCOCH2OOH = HO2 + CO + HCHO + OH : 	J(15) 	;
{2720.} 	 CO2C3PAN = CO2C3CO3 + NO2 : 	KBPAN 	;
{2721.} 	 CO2C3PAN + OH = MGLYOX + CO + NO2 : 	5.93D-13 	;
{2722.} 	 CO2C3CO3H = CH3COCH2O2 + OH : 	J(41)+J(22) 	;
{2723.} 	 CO2C3CO3H + OH = CO2C3CO3 : 	4.18D-12 	;
{2724.} 	 OH + HO2C3CO3H = HO2C3CO3 : 	3.12D-11 	;
{2725.} 	 HO2C3CO3H = IPROPOLO2 + OH : 	J(41) 	;
{2726.} 	 OH + HO2C3CO2H = IPROPOLO2 : 	2.78D-11 	;
{2727.} 	 C4PAN3 = HO2C3CO3 + NO2 : 	KBPAN 	;
{2728.} 	 OH + C4PAN3 = CH3CHOHCHO + CO + NO2 : 	9.00D-12 	;
{2729.} 	 OH + HOC3H6CO2H = HO1C3O2 : 	9.64D-12 	;
{2730.} 	 OH + HOC3H6CO3H = HOC3H6CO3 : 	1.31D-11 	;
{2731.} 	 HOC3H6CO3H = HO1C3O2 + OH : 	J(41) 	;
{2732.} 	 C4PAN1 = HOC3H6CO3 + NO2 : 	KBPAN 	;
{2733.} 	 OH + C4PAN1 = HOC2H4CHO + CO + NO2 : 	5.92D-12 	;
{2734.} 	 HO1CO3C4O = HOC2H4CO3 + HCHO : 	KDEC 	;
{2735.} 	 HO1CO3CHO + OH = HOC2H4CO3 + CO : 	2.56D-11 	;
{2736.} 	 HO1CO3CHO = HOC2H4CO3 + HO2 + CO : 	J(34) 	;
{2737.} 	 HO1CO3CHO + NO3 = HOC2H4CO3 + CO + HNO3 : 	KNO3AL*4.0 	;
{2738.} 	 HO14CO2C4 = HOCH2CO3 + HOCH2CH2O2 : 	J(22) 	;
{2739.} 	 HO14CO2C4 + OH = HO1CO3CHO + HO2 : 	1.57D-11 	;
{2740.} 	 HOCO3C4OOH = HO1CO3C4O + OH : 	J(41)+J(22) 	;
{2741.} 	 HOCO3C4OOH + OH = HO1CO3CHO + OH : 	2.16D-11 	;
{2742.} 	 HOCO3C4OOH + OH = HO1CO3C4O2 : 	1.90D-12*EXP(190/TEMP) 	;
{2743.} 	 OH + BIACETOOH = CO23C3CHO + OH : 	5.99D-12 	;
{2744.} 	 OH + BIACETOOH = BIACETO2 : 	1.90D-12*EXP(190/TEMP) 	;
{2745.} 	 BIACETOOH = BIACETO + OH : 	J(41)+J(35) 	;
{2746.} 	 OH + HOIPRCO2H = HYPROPO2 : 	1.46D-11 	;
{2747.} 	 HOIPRCO3H = HYPROPO2 + OH : 	J(41) 	;
{2748.} 	 OH + HOIPRCO3H = HOIPRCO3 : 	1.82D-11 	;
{2749.} 	 C4PAN4 = HOIPRCO3 + NO2 : 	KBPAN 	;
{2750.} 	 OH + C4PAN4 = ACETOL + CO + NO2 : 	1.45D-11 	;
{2751.} 	 PRPAL2CO2H + OH = PROPALO2 : 	7.29D-11 	;
{2752.} 	 PRPAL2CO2H = PROPALO2 + HO2 : 	J(17) 	;
{2753.} 	 PRPAL2CO3H = PROPALO2 + OH : 	J(41)+J(17) 	;
{2754.} 	 PRPAL2CO3H + OH = IBUDIALCO3 : 	7.65D-11 	;
{2755.} 	 IBUDIALPAN = IBUDIALCO3 + NO2 : 	KBPAN 	;
{2756.} 	 IBUDIALPAN + OH = MGLYOX + CO + NO2 : 	7.29D-11 	;
{2757.} 	 PROPALOOH = PROPALO + OH : 	J(41) 	;
{2758.} 	 PROPALOOH + OH = MGLYOX + OH : 	4.31D-11 	;
{2759.} 	 PROPALOOH = HO2 + CO + CH3CHO + OH : 	J(15) 	;
{2760.} 	 IPRHOCO2H + OH = CH3COCH3 + HO2 : 	1.72D-12 	;
{2761.} 	 OH + IPRHOCO3H = IPRHOCO3 : 	4.80D-12 	;
{2762.} 	 IPRHOCO3H = CH3COCH3 + HO2 + OH : 	J(41) 	;
{2763.} 	 C4PAN5 = IPRHOCO3 + NO2 : 	KBPAN 	;
{2764.} 	 OH + C4PAN5 = CH3COCH3 + CO + NO2 : 	4.75D-13 	;
{2765.} 	 OH + CO3C4CO2H = MEKCO2 : 	1.90D-12 	;
{2766.} 	 CO3C4CO2H = MEKCO2 + HO2 : 	J(22) 	;
{2767.} 	 C5PAN16 = CO3C4CO3 + NO2 : 	KBPAN 	;
{2768.} 	 OH + C5PAN16 = EGLYOX + CO + NO2 : 	1.44D-12 	;
{2769.} 	 OH + CO3C4CO3H = CO3C4CO3 : 	5.36D-12 	;
{2770.} 	 CO3C4CO3H = MEKCO2 + OH : 	J(41)+J(22) 	;
{2771.} 	 C5PAN8 = HO3C4CO3 + NO2 : 	KBPAN 	;
{2772.} 	 OH + C5PAN8 = HO3C3CHO + CO + NO2 : 	1.20D-11 	;
{2773.} 	 HO3C4CO3H = HO3C4O2 + OH : 	J(41) 	;
{2774.} 	 OH + HO3C4CO3H = HO3C4CO3 : 	3.84D-11 	;
{2775.} 	 OH + C51NO3 = HO1CO24C5 + NO2 : 	1.55D-12 	;
{2776.} 	 C51NO3 = C51O + NO2 : 	J(22) 	;
{2777.} 	 C51O = CO2C3CHO + HCHO + HO2 : 	2.00D+14*EXP(-6382/TEMP) 	;
{2778.} 	 HO1CO24C5 = CH3COCH2O2 + HOCH2CO3 : 	J(22)*2 	;
{2779.} 	 OH + HO1CO24C5 = CO24C4CHO + HO2 : 	3.22D-12 	;
{2780.} 	 OH + C51OH = HO1CO24C5 + OH : 	3.78D-11 	;
{2781.} 	 OH + C51OOH = HO1CO24C5 + OH : 	8.69D-11 	;
{2782.} 	 C51OOH = C51O + OH : 	J(41)+J(22) 	;
{2783.} 	 CO2C4CO3 = CO2C4CO2H : 	1.00D-11*0.3*RO2 	;
{2784.} 	 CO2C4CO3 = MEKAO2 : 	1.00D-11*0.7*RO2 	;
{2785.} 	 CO2C4CO3 + NO = MEKAO2 + NO2 : 	KAPNO 	;
{2786.} 	 CO2C4CO3 + NO2 = C5PAN2 : 	KFPAN 	;
{2787.} 	 CO2C4CO3 + HO2 = CO2C4CO2H + O3 : 	KAPHO2*0.29 	;
{2788.} 	 CO2C4CO3 + HO2 = CO2C4CO3H : 	KAPHO2*0.71 	;
{2789.} 	 CO2C4CO3 + NO3 = MEKAO2 + NO2 : 	KRO2NO3*1.60 	;
{2790.} 	 CO23C54O = CH3CHO + CH3CO3 + CO : 	KDEC 	;
{2791.} 	 CO23C54OOH = CO23C54O + OH : 	J(41)+J(35) 	;
{2792.} 	 CO23C54OOH + OH = CO23C54O2 : 	2.24D-11 	;
{2793.} 	 HO2CO4C5O = CO2C3CO3 + HCHO : 	KDEC 	;
{2794.} 	 HO2CO4CHO = HO2C3CO3 + HO2 + CO : 	J(34) 	;
{2795.} 	 HO2CO4CHO + OH = CO24C4CHO + HO2 : 	3.02D-11 	;
{2796.} 	 HO14CO2C5 = IPROPOLO2 + HOCH2CO3 : 	J(22) 	;
{2797.} 	 HO14CO2C5 + OH = HO1CO24C5 + HO2 : 	3.06D-11 	;
{2798.} 	 HOCO4C5OOH = HO2CO4C5O + OH : 	J(41)+J(22) 	;
{2799.} 	 HOCO4C5OOH + OH = HO2CO4C5O2 : 	1.90D-12*EXP(190/TEMP) 	;
{2800.} 	 HOCO4C5OOH + OH = HO2CO4CHO + OH : 	3.67D-11 	;
{2801.} 	 CO24C53O = MGLYOX + CH3CO3 : 	KDEC 	;
{2802.} 	 CO24C53OOH = CO24C53O + OH : 	J(41) 	;
{2803.} 	 CO24C53OOH + OH = CO24C53O2 : 	1.75D-11 	;
{2804.} 	 CO24C53OOH = MGLYOX + CH3CO3 + OH : 	J(22) 	;
{2805.} 	 OH + HO2C4CO2H = HO2C4O2 : 	1.11D-11 	;
{2806.} 	 C5PAN1 = HO2C4CO3 + NO2 : 	KBPAN 	;
{2807.} 	 OH + C5PAN1 = HO2C3CHO + CO + NO2 : 	1.04D-11 	;
{2808.} 	 OH + HO2C4CO3H = HO2C4CO3 : 	1.45D-11 	;
{2809.} 	 HO2C4CO3H = HO2C4O2 + OH : 	J(41) 	;
{2810.} 	 HO2C4O = HO13C4O2 : 	3.05D+11*EXP(-4240/TEMP) 	;
{2811.} 	 HO2C4O = HO2C3CHO + HO2 : 	KROPRIM*O2 	;
{2812.} 	 OH + HO2C4NO3 = HO2C3CHO + NO2 : 	8.93D-12 	;
{2813.} 	 HO2C4NO3 = HO2C4O + NO2 : 	J(53) 	;
{2814.} 	 OH + HO2C4OOH = HO2C4O2 : 	1.90D-12*EXP(190/TEMP) 	;
{2815.} 	 OH + HO2C4OOH = HO2C3CHO + OH : 	1.97D-11 	;
{2816.} 	 HO2C4OOH = HO2C4O + OH : 	J(41) 	;
{2817.} 	 HOCO3C54O = CH3CHO + HOC2H4CO3 : 	KDEC 	;
{2818.} 	 OH + HO1CO34C5 = CO23C4CHO + HO2 : 	1.39D-11 	;
{2819.} 	 HO1CO34C5 = CH3CO3 + HOC2H4CO3 : 	J(35) 	;
{2820.} 	 HO14CO3C5 + OH = HO1CO34C5 + HO2 : 	1.88D-11 	;
{2821.} 	 HO14CO3C5 = CH3CHO + HOC2H4CO3 : 	J(22) 	;
{2822.} 	 HOCO3C5OOH + OH = HOCO3C54O2 : 	3.57D-11 	;
{2823.} 	 HOCO3C5OOH = HOCO3C54O + OH : 	J(41) 	;
{2824.} 	 HOCO3C5OOH = CH3CHO + HOC2H4CO3 + OH : 	J(22) 	;
{2825.} 	 OH + HO13C5NO3 = HO13CO4C5 + NO2 : 	7.51D-12 	;
{2826.} 	 HO13C5NO3 = HO13C5O + NO2 : 	J(53) 	;
{2827.} 	 HO13C5O = HOC2H4CHO + CH3CHO + HO2 : 	2.00D+14*EXP(-4714/TEMP) 	;
{2828.} 	 OH + HO13CO4C5 = HO1CO34C5 + HO2 : 	1.51D-11 	;
{2829.} 	 HO13CO4C5 = CH3CO3 + HOC2H4CHO + HO2 : 	J(22) 	;
{2830.} 	 OH + HO134C5 = HO13CO4C5 + HO2 : 	2.46D-11 	;
{2831.} 	 OH + HO13C5OOH = HO13CO4C5 + OH : 	3.98D-11 	;
{2832.} 	 HO13C5OOH = HO13C5O + OH : 	J(41) 	;
{2833.} 	 HOBUT2CO3 = HOBUT2CO2H : 	1.00D-11*0.3*RO2 	;
{2834.} 	 HOBUT2CO3 = NBUTOLBO2 : 	1.00D-11*0.7*RO2 	;
{2835.} 	 HOBUT2CO3 + NO2 = C5PAN5 : 	KFPAN 	;
{2836.} 	 HOBUT2CO3 + HO2 = HOBUT2CO3H : 	KAPHO2*0.71 	;
{2837.} 	 HOBUT2CO3 + HO2 = HOBUT2CO2H + O3 : 	KAPHO2*0.29 	;
{2838.} 	 HOBUT2CO3 + NO = NBUTOLBO2 + NO2 : 	KAPNO 	;
{2839.} 	 HOBUT2CO3 + NO3 = NBUTOLBO2 + NO2 : 	KRO2NO3*1.60 	;
{2840.} 	 C5PAN3 = HOIBUTCO3 + NO2 : 	KBPAN 	;
{2841.} 	 OH + C5PAN3 = HOIPRCHO + CO + NO2 : 	7.61D-12 	;
{2842.} 	 OH + HOIBUTCO3H = HOIBUTCO3 : 	1.79D-11 	;
{2843.} 	 HOIBUTCO3H = SC4H9O2 + OH : 	J(41) 	;
{2844.} 	 OH + HO2C43CO2H = BUT2OLO2 : 	2.93D-11 	;
{2845.} 	 HO2C43CO3H = BUT2OLO2 + OH : 	J(41) 	;
{2846.} 	 OH + HO2C43CO3H = HO2C43CO3 : 	3.27D-11 	;
{2847.} 	 C5PAN14 = HO2C43CO3 + NO2 : 	KBPAN 	;
{2848.} 	 OH + C5PAN14 = BUT2OLO + CO + NO2 : 	9.54D-12 	;
{2849.} 	 OH + C56NO3 = C42CHO + NO2 : 	5.22D-12 	;
{2850.} 	 C56O = HOIPRCHO + HCHO + HO2 : 	2.00D+14*EXP(-5489/TEMP) 	;
{2851.} 	 OH + C42CHO = C42CO3 : 	4.08D-11 	;
{2852.} 	 NO3 + C42CHO = C42CO3 + HNO3 : 	KNO3AL*8.5 	;
{2853.} 	 C42CHO = HOIPRCHO + HO2 + HO2 + CO : 	J(15) 	;
{2854.} 	 OH + C56OH = C42CHO + HO2 : 	2.17D-11 	;
{2855.} 	 OH + C56OOH = C56O2 : 	1.90D-12*EXP(190/TEMP) 	;
{2856.} 	 OH + C56OOH = C42CHO + OH : 	2.72D-11 	;
{2857.} 	 C56OOH = C56O + OH : 	J(41) 	;
{2858.} 	 C53O = HCHO + HOIPRCO3 : 	KDEC 	;
{2859.} 	 OH + HOIPRGLYOX = HOIPRCO3 + CO : 	2.72D-11 	;
{2860.} 	 HOIPRGLYOX = HOIPRCO3 + CO + HO2 : 	J(34) 	;
{2861.} 	 OH + C53OH = HOIPRGLYOX + HO2 : 	1.72D-11 	;
{2862.} 	 C53OH = HCHO + HOIPRCO3 + HO2 : 	J(22) 	;
{2863.} 	 OH + C53OOH = C53O2 : 	1.90D-12*EXP(190/TEMP) 	;
{2864.} 	 OH + C53OOH = HOIPRGLYOX + OH : 	3.26D-11 	;
{2865.} 	 C53OOH = C53O + OH : 	J(41) 	;
{2866.} 	 C53OOH = HCHO + HOIPRCO3 + OH : 	J(22) 	;
{2867.} 	 OH + C41CO2H = MEKBO2 : 	4.00D-12 	;
{2868.} 	 C41CO2H = CH3CO3 + C2H5O2 : 	J(22) 	;
{2869.} 	 C41CO3H = MEKBO2 + OH : 	J(41) 	;
{2870.} 	 OH + C41CO3H = C41CO3 : 	7.56D-12 	;
{2871.} 	 C41CO3H = CH3CO3 + C2H5CO3 : 	J(22) 	;
{2872.} 	 C5PAN7 = C41CO3 + NO2 : 	KBPAN 	;
{2873.} 	 OH + C5PAN7 = BIACET + CO + NO2 : 	3.96D-12 	;
{2874.} 	 PROL1MPAN = PROL1MCO3 + NO2 : 	KBPAN 	;
{2875.} 	 PROL1MPAN + OH = MEK + CO + NO2 : 	1.62D-12 	;
{2876.} 	 PROL1MCO3H + OH = PROL1MCO3 : 	8.08D-12 	;
{2877.} 	 PROL1MCO3H = MEK + HO2 + OH : 	J(41) 	;
{2878.} 	 OH + H2M2C3CO3H = H2M2C3CO3 : 	4.83D-12 	;
{2879.} 	 H2M2C3CO3H = TBUTOLO2 + OH : 	J(41) 	;
{2880.} 	 C5PAN11 = H2M2C3CO3 + NO2 : 	KBPAN 	;
{2881.} 	 OH + C5PAN11 = IBUTALOH + CO + NO2 : 	1.23D-12 	;
{2882.} 	 OH + C54NO3 = H13C43CHO + NO2 : 	5.93D-12 	;
{2883.} 	 C54O = CO2C5OH + HO2 : 	2.00D+14*EXP(-4909/TEMP) 	;
{2884.} 	 OH + H13C43CHO = H13C43CO3 : 	3.00D-11 	;
{2885.} 	 NO3 + H13C43CHO = H13C43CO3 + HNO3 : 	KNO3AL*8.5 	;
{2886.} 	 H13C43CHO = MEKAOH + HO2 + HO2 + CO : 	J(17) 	;
{2887.} 	 OH + C54OH = H13C43CHO + HO2 : 	9.90D-12 	;
{2888.} 	 OH + C54OOH = H13C43CHO + OH : 	1.54D-11 	;
{2889.} 	 OH + C54OOH = C54O2 : 	1.90D-12*EXP(190/TEMP) 	;
{2890.} 	 C54OOH = C54O + OH : 	J(41) 	;
{2891.} 	 OH + C63NO3 = HO1CO24C6 + NO2 : 	2.54D-12 	;
{2892.} 	 C63NO3 = C63O + NO2 : 	J(22) 	;
{2893.} 	 C63O = CO3C4CHO + HCHO + HO2 : 	2.00D+14*EXP(-6261/TEMP) 	;
{2894.} 	 OH + C63OH = HO1CO24C6 + HO2 : 	3.90D-11 	;
{2895.} 	 C63OH = C63O + HO2 : 	J(22) 	;
{2896.} 	 HO1CO24C6 = HOCH2CO3 + MEKCO2 : 	J(22)*2 	;
{2897.} 	 OH + HO1CO24C6 = CO35C5CHO + HO2 : 	4.35D-12 	;
{2898.} 	 OH + C63OOH = HO1CO24C6 + OH : 	8.80D-11 	;
{2899.} 	 C63OOH = C63O + OH : 	J(41)+J(22) 	;
{2900.} 	 CO3C5CO3 = CO3C5CO2H : 	1.00D-11*0.3*RO2 	;
{2901.} 	 CO3C5CO3 = DIEKBO2 : 	1.00D-11*0.7*RO2 	;
{2902.} 	 CO3C5CO3 + NO2 = C6PAN2 : 	KFPAN 	;
{2903.} 	 CO3C5CO3 + HO2 = CO3C5CO3H : 	KAPHO2*0.71 	;
{2904.} 	 CO3C5CO3 + HO2 = CO3C5CO2H + O3 : 	KAPHO2*0.29 	;
{2905.} 	 CO3C5CO3 + NO = DIEKBO2 + NO2 : 	KAPNO 	;
{2906.} 	 CO3C5CO3 + NO3 = DIEKBO2 + NO2 : 	KRO2NO3*1.60 	;
{2907.} 	 CO2HOC61O = HO3C4CO3 + HCHO : 	KDEC 	;
{2908.} 	 CO2HOC6OOH = CO2HOC61O + OH : 	J(41)+J(22) 	;
{2909.} 	 CO2HOC6OOH + OH = CO2HOC61O2 : 	4.93D-11 	;
{2910.} 	 CO24C6O = CO2C3CO3 + CH3CHO : 	KDEC 	;
{2911.} 	 CO24C6OOH = CO24C6O + OH : 	J(22)+J(41) 	;
{2912.} 	 CO24C6OOH + OH = CO24C6O2 : 	1.90D-12*EXP(190/TEMP) 	;
{2913.} 	 CO24C6OOH + OH = CO235C6 + OH : 	1.93D-11 	;
{2914.} 	 CO24C6OOH = CH3CHO + CO2C3CO3 : 	J(22) 	;
{2915.} 	 CO25C6O = CO2C3CHO + CH3CO3 : 	KDEC 	;
{2916.} 	 OH + CO25C6OH = CO235C6 + HO2 : 	2.29D-11 	;
{2917.} 	 CO25C6OH = CH3CO3 + CO2C3CHO + HO2 : 	J(22)*2 	;
{2918.} 	 OH + CO235C6 = C62O2 : 	7.29D-13 	;
{2919.} 	 CO235C6 = CH3CO3 + CH3COCH2O2 + CO : 	J(22) 	;
{2920.} 	 CO235C6 = CH3CO3 + CO2C3CO3 : 	J(35) 	;
{2921.} 	 OH + CO25C6OOH = CO235C6 + OH : 	5.42D-11 	;
{2922.} 	 CO25C6OOH = CO25C6O + OH : 	J(41) 	;
{2923.} 	 CO25C6OOH = CH3CO3 + CO2C3CHO + OH : 	J(22)*2 	;
{2924.} 	 OH + C61NO3 = C61CO + NO2 : 	2.04D-12 	;
{2925.} 	 C61NO3 = C61O + NO2 : 	J(54)+J(22) 	;
{2926.} 	 C61O = CO2C3CHO + CH3CHO + HO2 : 	2.00D+14*EXP(-4714/TEMP) 	;
{2927.} 	 OH + C61CO = CO235C6 + HO2 : 	6.03D-12 	;
{2928.} 	 C61CO = CO2C3CO3 + CH3CHO + HO2 : 	J(22)*2 	;
{2929.} 	 OH + C61OH = C61CO + HO2 : 	4.22D-11 	;
{2930.} 	 C61OH = C61O + HO2 : 	J(22) 	;
{2931.} 	 OH + C61OOH = C61CO + OH : 	9.12D-11 	;
{2932.} 	 C61OOH = C61O + OH : 	J(41)+J(22) 	;
{2933.} 	 CO23C65O = CO235C6 + HO2 : 	KROSEC*O2 	;
{2934.} 	 CO23C65O = CH3CHO + BIACETO2 : 	2.70D+14*EXP(-7398/TEMP) 	;
{2935.} 	 CO23C65OOH = CO23C65O + OH : 	J(35)+J(41) 	;
{2936.} 	 CO23C65OOH + OH = CO23C65O2 : 	1.06D-10 	;
{2937.} 	 OH + HO3C5CO2H = HO3C5O2 : 	1.72D-11 	;
{2938.} 	 C6PAN1 = HO3C5CO3 + NO2 : 	KBPAN 	;
{2939.} 	 OH + C6PAN1 = HO3C4CHO + CO + NO2 : 	1.35D-11 	;
{2940.} 	 OH + HO3C5CO3H = HO3C5CO3 : 	2.07D-11 	;
{2941.} 	 HO3C5CO3H = HO3C5O2 + OH : 	J(41) 	;
{2942.} 	 C6HO1CO3O = C2H5CHO + HOC2H4CO3 : 	KDEC 	;
{2943.} 	 C6CO34HO1 + OH = C6CO134 + HO2 : 	1.46D-11 	;
{2944.} 	 C6CO34HO1 = C2H5CO3 + HOC2H4CO3 : 	J(35) 	;
{2945.} 	 C6CO3HO14 + OH = C6CO34HO1 + HO2 : 	2.34D-11 	;
{2946.} 	 C6CO3HO14 = C2H5CHO + HOC2H4CO3 + HO2 : 	J(22) 	;
{2947.} 	 C6HOCOOOH + OH = C6HO1CO3O2 : 	1.90D-12*EXP(190/TEMP) 	;
{2948.} 	 C6HOCOOOH + OH = C6CO34HO1 + OH : 	4.05D-11 	;
{2949.} 	 C6HOCOOOH = C6HO1CO3O + OH : 	J(41) 	;
{2950.} 	 C6HOCOOOH = C2H5CHO + HOC2H4CO3 + OH : 	J(22) 	;
{2951.} 	 C3COCPAN = C3COCCO3 + NO2 : 	KBPAN 	;
{2952.} 	 C3COCPAN + OH = PGLYOX + CO + NO2 : 	5.18D-12 	;
{2953.} 	 C3COCCO3H + OH = C3COCCO3 : 	8.77D-12 	;
{2954.} 	 C3COCCO3H = PEN2ONE1O2 + OH : 	J(41) 	;
{2955.} 	 PEN2ONE1O = C3H7CO3 + HCHO : 	KDEC 	;
{2956.} 	 PE2ONE1OOH = PEN2ONE1O + OH : 	J(41) 	;
{2957.} 	 PE2ONE1OOH + OH = PEN2ONE1O2 : 	1.66D-11 	;
{2958.} 	 C6CO34O = CH3CHO + C2H5CO3 + CO : 	KDEC 	;
{2959.} 	 C6CO34OOH + OH = C6CO34O2 : 	2.36D-11 	;
{2960.} 	 C6CO34OOH = C6CO34O + OH : 	J(41)+J(35) 	;
{2961.} 	 C6CO3OH5O = CH3CHO + HO2C3CO3 : 	KDEC 	;
{2962.} 	 C6CO23HO5 + OH = CO235C6 + HO2 : 	2.86D-11 	;
{2963.} 	 C6CO23HO5 = HO2C3CO3 + CH3CO3 : 	J(35) 	;
{2964.} 	 C6CO3HO25 + OH = C61CO + HO2 : 	3.38D-11 	;
{2965.} 	 C6CO3HO25 = IPROPOLO2 + CH3CHOHCO3 : 	J(22) 	;
{2966.} 	 C6CO3OHOOH + OH = C6CO3OH5O2 : 	1.90D-12*EXP(190/TEMP) 	;
{2967.} 	 C6CO3OHOOH + OH = C6CO23HO5 + OH : 	4.67D-11 	;
{2968.} 	 C6CO3OHOOH = C6CO3OH5O + OH : 	J(41)+J(22) 	;
{2969.} 	 CO14O3CHO + OH = CO + HCOCH2O2 : 	3.44D-11 	;
{2970.} 	 CO14O3CHO = HO2 + CO + HCOCH2O2 : 	J(34) 	;
{2971.} 	 CO14O3CHO + NO3 = CO + HCOCH2O2 + HNO3 : 	KNO3AL*8.0 	;
{2972.} 	 CO14O3CO2H + OH = HCOCH2O2 : 	2.19D-11 	;
{2973.} 	 NBZFUONE + OH = BZFUCO + NO2 : 	1.16D-12 	;
{2974.} 	 MALANHYO2 = MALANHYO : 	8.80D-13*0.6*RO2 	;
{2975.} 	 MALANHYO2 = MALANHY2OH : 	8.80D-13*0.2*RO2 	;
{2976.} 	 MALANHYO2 = MALNHYOHCO : 	8.80D-13*0.2*RO2 	;
{2977.} 	 MALANHYO2 + NO = MALANHYO + NO2 : 	KRO2NO 	;
{2978.} 	 MALANHYO2 + HO2 = MALANHYOOH : 	KRO2HO2*0.625 	;
{2979.} 	 MALANHYO2 + NO3 = MALANHYO + NO2 : 	KRO2NO3 	;
{2980.} 	 NPHEN1OOH = NPHEN1O + OH : 	J(41) 	;
{2981.} 	 NPHEN1OOH + OH = NPHEN1O2 : 	9.00D-13 	;
{2982.} 	 DNPHENO2 = DNPHENO : 	8.00D-13*RO2 	;
{2983.} 	 DNPHENO2 + NO = DNPHENO + NO2 : 	KRO2NO 	;
{2984.} 	 DNPHENO2 + HO2 = DNPHENOOH : 	KRO2HO2*0.770 	;
{2985.} 	 DNPHENO2 + NO3 = DNPHENO + NO2 : 	KRO2NO3 	;
{2986.} 	 NDNPHENO2 = NDNPHENO : 	8.00D-13*RO2 	;
{2987.} 	 NDNPHENO2 + NO = NDNPHENO + NO2 : 	KRO2NO 	;
{2988.} 	 NDNPHENO2 + HO2 = NDNPHENOOH : 	KRO2HO2*0.770 	;
{2989.} 	 NDNPHENO2 + NO3 = NDNPHENO + NO2 : 	KRO2NO3 	;
{2990.} 	 PBZQO = C5CO2OHCO3 : 	KDEC 	;
{2991.} 	 PBZQOH + OH = PBZQCO + HO2 : 	9.18D-11 	;
{2992.} 	 PBZQCO + OH = C5CO2OHCO3 : 	6.07D-11 	;
{2993.} 	 PBZQOOH = PBZQO + OH : 	J(41) 	;
{2994.} 	 PBZQOOH + OH = PBZQCO + OH : 	1.23D-10 	;
{2995.} 	 NBZQO = C6CO4DB + NO2 : 	KDEC 	;
{2996.} 	 NBZQOOH = NBZQO + OH : 	J(41) 	;
{2997.} 	 NBZQOOH + OH = NBZQO2 : 	6.68D-11 	;
{2998.} 	 NCATECO = NC4DCO2H + HCOCO2H + HO2 : 	KDEC 	;
{2999.} 	 NCATECOOH = NCATECO + OH : 	J(41) 	;
{3000.} 	 NCATECOOH + OH = NCATECO2 : 	1.90D-12*EXP(190/TEMP) 	;
{3001.} 	 NNCATECO = NC4DCO2H + HCOCO2H + NO2 : 	KDEC 	;
{3002.} 	 NNCATECOOH = NNCATECO + OH : 	J(41) 	;
{3003.} 	 NNCATECOOH + OH = NNCATECO2 : 	1.90D-12*EXP(190/TEMP) 	;
{3004.} 	 ACCOMECHO + OH = ACCOMECO3 : 	7.09D-11 	;
{3005.} 	 ACCOMECHO = MECOACETO2 + HO2 + CO : 	J(15) 	;
{3006.} 	 ACCOMECHO + NO3 = ACCOMECO3 + HNO3 : 	KNO3AL*5.5 	;
{3007.} 	 C24O3CCO2H + OH = MECOACETO2 : 	8.76D-13 	;
{3008.} 	 MECOACETO = CH3CO3 + HCHO : 	KDEC 	;
{3009.} 	 MECOACEOOH = MECOACETO + OH : 	J(41) 	;
{3010.} 	 MECOACEOOH + OH = MECOACETO2 : 	3.59D-12 	;
{3011.} 	 C54CO + OH = CO + CO + CO + CH3CO3 : 	1.72D-11 	;
{3012.} 	 C54CO = HO2 + CO + CO + CO + CH3CO3 : 	J(34)+J(35)*2 	;
{3013.} 	 C54CO + NO3 = CO + CO + CO + CH3CO3 + HNO3 : 	KNO3AL*5.5 	;
{3014.} 	 MMALANHY + OH = MMALANHYO2 : 	1.50D-12 	;
{3015.} 	 CH3COCO3H = CH3CO3 + OH : 	J(41)+J(35) 	;
{3016.} 	 CH3COCO3H + OH = CH3COCO3 : 	3.69D-12 	;
{3017.} 	 PXYFUO = C23O3CCHO + HO2 : 	KDEC 	;
{3018.} 	 PXYFUOH + OH = PXYFUO : 	2.44D-11 	;
{3019.} 	 PXYFUOOH = PXYFUO + OH : 	J(41) 	;
{3020.} 	 PXYFUOOH + OH = PXYFUO2 : 	2.78D-11 	;
{3021.} 	 MCOCOMOXO = HCHO + CH3CO3 : 	KDEC 	;
{3022.} 	 MCOCOMOOOH = MCOCOMOXO + OH : 	J(41) 	;
{3023.} 	 MCOCOMOOOH + OH = MCOCOMOXO2 : 	2.00D-11 	;
{3024.} 	 MCOCOMOOOH = CH3CO3 + HCHO + OH : 	J(22) 	;
{3025.} 	 NPXYFUO = C23O3CCHO + NO2 : 	KDEC 	;
{3026.} 	 NPXYFUOOH = NPXYFUO + OH : 	J(41) 	;
{3027.} 	 NPXYFUOOH + OH = NPXYFUO2 : 	5.16D-12 	;
{3028.} 	 NCRES1OOH = NCRES1O + OH : 	J(41) 	;
{3029.} 	 NCRES1OOH + OH = NCRES1O2 : 	1.53D-12 	;
{3030.} 	 DNCRESO2 = DNCRESO : 	8.00D-13*RO2 	;
{3031.} 	 DNCRESO2 + NO = DNCRESO + NO2 : 	KRO2NO 	;
{3032.} 	 DNCRESO2 + HO2 = DNCRESOOH : 	KRO2HO2*0.820 	;
{3033.} 	 DNCRESO2 + NO3 = DNCRESO + NO2 : 	KRO2NO3 	;
{3034.} 	 NDNCRESO2 = NDNCRESO : 	8.00D-13*RO2 	;
{3035.} 	 NDNCRESO2 + NO = NDNCRESO + NO2 : 	KRO2NO 	;
{3036.} 	 NDNCRESO2 + HO2 = NDNCRESOOH : 	KRO2HO2*0.820 	;
{3037.} 	 NDNCRESO2 + NO3 = NDNCRESO + NO2 : 	KRO2NO3 	;
{3038.} 	 PTLQO = C6CO2OHCO3 : 	KDEC 	;
{3039.} 	 PTLQOH + OH = PTLQCO + HO2 : 	1.11D-10 	;
{3040.} 	 PTLQCO + OH = C6CO2OHCO3 : 	7.95D-11 	;
{3041.} 	 PTLQOOH = PTLQO + OH : 	J(41) 	;
{3042.} 	 PTLQOOH + OH = PTLQCO + OH : 	1.42D-10 	;
{3043.} 	 NPTLQO = C7CO4DB + NO2 : 	KDEC 	;
{3044.} 	 NPTLQOOH = NPTLQO + OH : 	J(41) 	;
{3045.} 	 NPTLQOOH + OH = NPTLQO2 : 	8.56D-11 	;
{3046.} 	 MNCATECO = NC4MDCO2H + HCOCO2H + HO2 : 	KDEC 	;
{3047.} 	 MNCATECOOH = MNCATECO + OH : 	J(41) 	;
{3048.} 	 MNCATECOOH + OH = MNCATECO2 : 	1.90D-12*EXP(190/TEMP) 	;
{3049.} 	 MNNCATECO = NC4MDCO2H + HCOCO2H + NO2 : 	KDEC 	;
{3050.} 	 MNNCATCOOH = MNNCATECO + OH : 	J(41) 	;
{3051.} 	 MNNCATCOOH + OH = MNNCATECO2 : 	1.90D-12*EXP(190/TEMP) 	;
{3052.} 	 H1CO23CHO + OH = CO + CO + HOCH2CO3 : 	1.44D-11 	;
{3053.} 	 H1CO23CHO = CO + CO + HOCH2CO3 + HO2 : 	J(34)+J(35) 	;
{3054.} 	 H13CO2CO3 + NO2 = C4PAN10 : 	KFPAN 	;
{3055.} 	 H13CO2CO3 + HO2 = H13CO2CO3H : 	KAPHO2 	;
{3056.} 	 H13CO2CO3 = HOCH2COCHO + HO2 : 	1.00D-11*RO2 	;
{3057.} 	 H13CO2CO3 + NO = HOCH2COCHO + HO2 + NO2 : 	KAPNO 	;
{3058.} 	 H13CO2CO3 + NO3 = HOCH2COCHO + HO2 + NO2 : 	KRO2NO3*1.60 	;
{3059.} 	 ACO3B = OCCOHCOH : 	0.1*2.9E-12*RO2 	;
{3060.} 	 ACO3B = HOCH2COCHO : 	0.1*2.9E-12*RO2 	;
{3061.} 	 ACO3B = CHOCOHCO : 	0.8*2.9E-12*RO2 	;
{3062.} 	 ACO3B + NO = CHOCOHONO2 : 	KRO2NO*0.03 	;
{3063.} 	 ACO3B + HO2 = HOCHOCOOH + O3 : 	KRO2HO2*0.52*0.6 	;
{3064.} 	 ACO3B + NO = CHOCOHCO + NO2 : 	KRO2NO*0.97 	;
{3065.} 	 ACO3B + HO2 = HOCH2COCHO : 	KRO2HO2*0.52*0.4 	;
{3066.} 	 ACO3B + NO3 = CHOCOHCO + NO2 : 	KRO2NO3 	;
{3067.} 	 OCCOHCO2 = OCCOHCOH : 	0.1*2.0E-12*RO2 	;
{3068.} 	 OCCOHCO2 + NO = C42AOH : 	0.05*KRO2NO 	;
{3069.} 	 OCCOHCO2 = OCCOHCO : 	0.8*2.0E-12*RO2 	;
{3070.} 	 OCCOHCO2 = C32OH13CO : 	0.1*2.0E-12*RO2 	;
{3071.} 	 OCCOHCO2 + NO = OCCOHCO + NO2 : 	0.95*KRO2NO 	;
{3072.} 	 OCCOHCO2 + HO2 = OCCOHCOOH : 	0.6*0.52*KRO2HO2 	;
{3073.} 	 OCCOHCO2 + HO2 = C32OH13CO + O3 : 	0.4*0.52*KRO2HO2 	;
{3074.} 	 OCCOHCO2 + NO3 = C42AOH + NO2 : 	KRO2NO3 	;
{3075.} 	 GLYOOB = GLYOO : 	KDEC*0.24 	;
{3076.} 	 GLYOOB = OH + CO + CO + HO2 : 	KDEC*0.36 	;
{3077.} 	 GLYOOB = HCHO : 	KDEC*0.20 	;
{3078.} 	 GLYOOB = HO2 + HO2 + CO : 	KDEC*0.20 	;
{3079.} 	 HOCH2COCO2H + OH = HOCH2CO3 : 	2.89D-12 	;
{3080.} 	 HOCH2COCO2H = HOCH2CO3 + HO2 : 	J(34) 	;
{3081.} 	 CH3SO2O2 = CH3SO2 : 	3.01D+10*EXP(-3560/TEMP) 	;
{3082.} 	 CH3SO2O2 = MSA : 	1.00D-11*RO2*0.3 	;
{3083.} 	 CH3SO2O2 = CH3SO3 : 	1.00D-11*RO2*0.7 	;
{3084.} 	 CH3SO2O2 + HO2 = MSA + O3 : 	KAPHO2*0.29 	;
{3085.} 	 CH3SO2O2 + HO2 = CH3SO2OOH : 	KAPHO2*0.71 	;
{3086.} 	 CH3SO2O2 + NO = CH3SO3 + NO2 : 	1.00D-11 	;
{3087.} 	 CH3SO2O2 + NO2 = CH3SO4NO2 : 	1.20D-12*(TEMP/300)**-0.9 	;
{3088.} 	 CH3SO2O2 + NO3 = CH3SO3 + NO2 : 	KRO2NO3*1.6 	;
{3089.} 	 CH3SO3 = CH3O2 + SO3 : 	5.00D+13*EXP(-9946/TEMP) 	;
{3090.} 	 CH3SO3 + HO2 = MSA : 	5.00D-11 	;
{3091.} 	 CH3SOOOH + OH = CH3SOO2 : 	9.00D-11 	;
{3092.} 	 CH3SOOOH = CH3SO2 + OH : 	J(41) 	;
{3093.} 	 CH3SOO2NO2 = CH3SOO2 + NO2 : 	5.40D+16*EXP(-13112/TEMP) 	;
{3094.} 	 CH3SOO2NO2 + OH = MSIA + NO2 : 	1.00D-11 	;
{3095.} 	 OH + CO24C4CHO = CO2C3CO3 + CO : 	1.33D-11 	;
{3096.} 	 CO24C4CHO = CO2C3CO3 + CO + HO2 : 	J(34) 	;
{3097.} 	 NO3 + CO24C4CHO = CO2C3CO3 + CO + HNO3 : 	KNO3AL*5.5 	;
{3098.} 	 OH + CO2C4CO2H = MEKAO2 : 	5.71D-12 	;
{3099.} 	 C5PAN2 = CO2C4CO3 + NO2 : 	KBPAN 	;
{3100.} 	 OH + C5PAN2 = CO2C3CHO + CO + NO2 : 	1.90D-12 	;
{3101.} 	 CO2C4CO3H = MEKAO2 + OH : 	J(41)+J(22) 	;
{3102.} 	 OH + CO2C4CO3H = CO2C4CO3 : 	9.17D-12 	;
{3103.} 	 HO13C4O2 + NO = HO13C4NO3 : 	KRO2NO*0.007 	;
{3104.} 	 HO13C4O2 = HO13C4O : 	2.00D-12*0.6*RO2 	;
{3105.} 	 HO13C4O2 = HO13C3CHO : 	2.00D-12*0.2*RO2 	;
{3106.} 	 HO13C4O2 = HO13C4OH : 	2.00D-12*0.2*RO2 	;
{3107.} 	 HO13C4O2 + NO = HO13C4O + NO2 : 	KRO2NO*0.993 	;
{3108.} 	 HO13C4O2 + HO2 = HO13C4OOH : 	KRO2HO2*0.625 	;
{3109.} 	 HO13C4O2 + NO3 = HO13C4O + NO2 : 	KRO2NO3 	;
{3110.} 	 OH + CO23C4CHO = CO23C4CO3 : 	6.65D-11 	;
{3111.} 	 CO23C4CHO = BIACETO2 + HO2 + CO : 	J(15) 	;
{3112.} 	 CO23C4CHO = CH3CO3 + HCOCH2CO3 : 	J(35) 	;
{3113.} 	 NO3 + CO23C4CHO = CO23C4CO3 + HNO3 : 	KNO3AL*5.5 	;
{3114.} 	 OH + HOBUT2CO2H = NBUTOLBO2 : 	1.11D-11 	;
{3115.} 	 C5PAN5 = HOBUT2CO3 + NO2 : 	KBPAN 	;
{3116.} 	 OH + C5PAN5 = MEKAOH + CO + NO2 : 	1.55D-11 	;
{3117.} 	 HOBUT2CO3H = NBUTOLBO2 + OH : 	J(41) 	;
{3118.} 	 OH + HOBUT2CO3H = HOBUT2CO3 : 	1.46D-11 	;
{3119.} 	 C42CO3 + NO2 = C5PAN13 : 	KFPAN 	;
{3120.} 	 C42CO3 + HO2 = C42CO3H : 	KAPHO2 	;
{3121.} 	 C42CO3 = HOIPRCHO + HO2 : 	1.00D-11*RO2 	;
{3122.} 	 C42CO3 + NO = HOIPRCHO + HO2 + NO2 : 	KAPNO 	;
{3123.} 	 C42CO3 + NO3 = HOIPRCHO + HO2 + NO2 : 	KRO2NO3*1.60 	;
{3124.} 	 H13C43CO3 + NO2 = C5PAN12 : 	KFPAN 	;
{3125.} 	 H13C43CO3 + HO2 = H13C43CO3H : 	KAPHO2 	;
{3126.} 	 H13C43CO3 = MEKAOH + HO2 : 	1.00D-11*RO2 	;
{3127.} 	 H13C43CO3 + NO = MEKAOH + HO2 + NO2 : 	KAPNO 	;
{3128.} 	 H13C43CO3 + NO3 = MEKAOH + HO2 + NO2 : 	KRO2NO3*1.60 	;
{3129.} 	 OH + CO35C5CHO = CO3C4CO3 + CO : 	1.44D-11 	;
{3130.} 	 CO35C5CHO = HO2 + CO + CO3C4CO3 : 	J(34) 	;
{3131.} 	 CO35C5CHO = HO2 + CO + CO + MEKCO2 : 	J(22) 	;
{3132.} 	 OH + CO3C5CO2H = DIEKBO2 : 	6.88D-12 	;
{3133.} 	 CO3C5CO2H = DIEKBO2 + HO2 : 	J(22) 	;
{3134.} 	 C6PAN2 = CO3C5CO3 + NO2 : 	KBPAN 	;
{3135.} 	 OH + C6PAN2 = CO3C4CHO + CO + NO2 : 	3.19D-12 	;
{3136.} 	 OH + CO3C5CO3H = CO3C5CO3 : 	1.03D-11 	;
{3137.} 	 CO3C5CO3H = DIEKBO2 + OH : 	J(41)+J(22) 	;
{3138.} 	 C62O2 = C62O : 	8.40D-13*RO2 	;
{3139.} 	 C62O2 + NO = C62O + NO2 : 	KRO2NO 	;
{3140.} 	 C62O2 + HO2 = C62OOH : 	KRO2HO2*0.770 	;
{3141.} 	 C62O2 + NO3 = C62O + NO2 : 	KRO2NO3 	;
{3142.} 	 C6CO134 + OH = C5CO34CO3 : 	7.27D-11 	;
{3143.} 	 PGLYOX + OH = C3H7CO3 + CO : 	1.67D-11 	;
{3144.} 	 PGLYOX = C3H7CO3 + HO2 + CO : 	J(34) 	;
{3145.} 	 PGLYOX + NO3 = C3H7CO3 + CO + HNO3 : 	KNO3AL*5.5 	;
{3146.} 	 MALANHYO = HCOCOHCO3 : 	KDEC 	;
{3147.} 	 MALANHY2OH + OH = MALNHYOHCO + HO2 : 	2.55D-11 	;
{3148.} 	 MALNHYOHCO + OH = CO + CO + CO + HO2 : 	5.68D-12 	;
{3149.} 	 MALANHYOOH = MALANHYO + OH : 	J(41) 	;
{3150.} 	 MALANHYOOH + OH = MALNHYOHCO + OH : 	4.66D-11 	;
{3151.} 	 DNPHENO = NC4DCO2H + HCOCO2H + NO2 : 	KDEC 	;
{3152.} 	 DNPHENOOH = DNPHENO + OH : 	J(41) 	;
{3153.} 	 DNPHENOOH + OH = DNPHENO2 : 	1.90D-12*EXP(190/TEMP) 	;
{3154.} 	 NDNPHENO = NC4DCO2H + HNO3 + CO + CO + NO2 : 	KDEC 	;
{3155.} 	 NDNPHENOOH = NDNPHENO + OH : 	J(41) 	;
{3156.} 	 NDNPHENOOH + OH = NDNPHENO2 : 	1.90D-12*EXP(190/TEMP) 	;
{3157.} 	 C5CO2OHCO3 + NO2 = C5CO2OHPAN : 	KFPAN 	;
{3158.} 	 C5CO2OHCO3 + HO2 = C5COOHCO3H : 	KAPHO2 	;
{3159.} 	 C5CO2OHCO3 = HOCOC4DIAL + HO2 + CO : 	1.00D-11*RO2 	;
{3160.} 	 C5CO2OHCO3 + NO = HOCOC4DIAL + HO2 + CO + NO2 : 	KAPNO 	;
{3161.} 	 C5CO2OHCO3 + NO3 = HOCOC4DIAL + HO2 + CO + NO2 : 	KRO2NO3*1.60 	;
{3162.} 	 C6CO4DB = C4CO2DBCO3 + HO2 + CO : 	J(34)*2 	;
{3163.} 	 C6CO4DB + OH = CO + CO + HO2 + CO + C33CO : 	7.70D-11 	;
{3164.} 	 NC4DCO2H + OH = NC4DCO2 : 	1.90D-12*EXP(190/TEMP) 	;
{3165.} 	 ACCOMECO3 = MECOACETO2 : 	1.00D-11*RO2 	;
{3166.} 	 ACCOMECO3 + HO2 = ACCOMECO3H : 	KAPHO2 	;
{3167.} 	 ACCOMECO3 + NO2 = ACCOMEPAN : 	KFPAN 	;
{3168.} 	 ACCOMECO3 + NO = MECOACETO2 + NO2 : 	KAPNO 	;
{3169.} 	 ACCOMECO3 + NO3 = MECOACETO2 + NO2 : 	KRO2NO3*1.60 	;
{3170.} 	 MMALANHYO2 = MMALANHYO : 	9.20D-14*RO2*0.70 	;
{3171.} 	 MMALANHYO2 = MMALNHY2OH : 	9.20D-14*RO2*0.30 	;
{3172.} 	 MMALANHYO2 + NO = MMALANHYO + NO2 : 	KRO2NO 	;
{3173.} 	 MMALANHYO2 + HO2 = MMALNHYOOH : 	KRO2HO2*0.706 	;
{3174.} 	 MMALANHYO2 + NO3 = MMALANHYO + NO2 : 	KRO2NO3 	;
{3175.} 	 CH3COCO3 = CH3CO3 : 	1.00D-11*RO2 	;
{3176.} 	 CH3COCO3 + NO = CH3CO3 + NO2 : 	KAPNO 	;
{3177.} 	 CH3COCO3 + HO2 = CH3COCO3H : 	KAPHO2 	;
{3178.} 	 CH3COCO3 + NO2 = CH3COPAN : 	KFPAN 	;
{3179.} 	 CH3COCO3 + NO3 = CH3CO3 + NO2 : 	KRO2NO3*1.60 	;
{3180.} 	 C23O3CCHO + OH = C23O3CCO3 : 	2.15D-11 	;
{3181.} 	 C23O3CCHO = CO + MCOCOMOXO2 + HO2 : 	J(15) 	;
{3182.} 	 C23O3CCHO + NO3 = C23O3CCO3 + HNO3 : 	KNO3AL*5.5 	;
{3183.} 	 DNCRESO = NC4MDCO2H + HCOCO2H + NO2 : 	KDEC 	;
{3184.} 	 DNCRESOOH = DNCRESO + OH : 	J(41) 	;
{3185.} 	 DNCRESOOH + OH = DNCRESO2 : 	1.90D-12*EXP(190/TEMP) 	;
{3186.} 	 NDNCRESO = NC4MDCO2H + HNO3 + CO + CO + NO2 : 	KDEC 	;
{3187.} 	 NDNCRESOOH = NDNCRESO + OH : 	J(41) 	;
{3188.} 	 NDNCRESOOH + OH = NDNCRESO2 : 	1.90D-12*EXP(190/TEMP) 	;
{3189.} 	 C6CO2OHCO3 + NO2 = C6CO2OHPAN : 	KFPAN 	;
{3190.} 	 C6CO2OHCO3 + HO2 = C6COOHCO3H : 	KAPHO2 	;
{3191.} 	 C6CO2OHCO3 = C5134CO2OH + HO2 + CO : 	1.00D-11*RO2 	;
{3192.} 	 C6CO2OHCO3 + NO = C5134CO2OH + HO2 + CO + NO2 : 	KAPNO 	;
{3193.} 	 C6CO2OHCO3 + NO3 = C5134CO2OH + HO2 + CO + NO2 : 	KRO2NO3*1.60 	;
{3194.} 	 C7CO4DB = C5CO2DBCO3 + HO2 + CO : 	J(34)*2 	;
{3195.} 	 C7CO4DB + OH = CO + CO + CH3CO3 + C33CO : 	9.58D-11 	;
{3196.} 	 NC4MDCO2H + OH = NC4MDCO2 : 	1.90D-12*EXP(190/TEMP) 	;
{3197.} 	 C4PAN10 = H13CO2CO3 + NO2 : 	KBPAN 	;
{3198.} 	 OH + C4PAN10 = HOCH2COCHO + CO + NO2 : 	5.83D-12 	;
{3199.} 	 OH + H13CO2CO3H = H13CO2CO3 : 	9.43D-12 	;
{3200.} 	 H13CO2CO3H = HOCH2COCHO + HO2 + OH : 	J(41) 	;
{3201.} 	 OCCOHCOH + OH = A2PANOO : 	6.218E-11 	;
{3202.} 	 CHOCOHCO = HOCH2CHO + HO2 + CO : 	KDEC 	;
{3203.} 	 CHOCOHONO2 + OH = HOCH2COCHO + NO2 : 	4.569E-12 	;
{3204.} 	 CHOCOHONO2 = CHOCOHCO + NO2 : 	J(53) 	;
{3205.} 	 CHOCOHONO2 = HOCH2CHO + CO + HO2 + NO2 : 	J(17) 	;
{3206.} 	 HOCHOCOOH + OH = ACO3B : 	4.774E-11 	;
{3207.} 	 HOCHOCOOH = HOCH2COCHO + OH : 	J(41) 	;
{3208.} 	 OH + C42AOH = NMGLYOX + HO2 : 	2.92D-11 	;
{3209.} 	 C42AOH = HO2 + CO + HO2 + NO3CH2CHO : 	J(15) 	;
{3210.} 	 OCCOHCO = HCHO + GLYOX + HO2 : 	KDEC 	;
{3211.} 	 OCCOHCOOH = OCCOHCO + OH : 	J(41) 	;
{3212.} 	 OCCOHCOOH + OH = OCCOHCO2 : 	9.258E-11 	;
{3213.} 	 MSA + OH = CH3SO3 : 	2.24D-14 	;
{3214.} 	 CH3SO2OOH + OH = CH3SO2O2 : 	3.60D-12 	;
{3215.} 	 CH3SO2OOH = CH3SO3 + OH : 	J(41) 	;
{3216.} 	 CH3SO4NO2 = CH3SO2O2 + NO2 : 	5.40D+16*EXP(-13112/TEMP) 	;
{3217.} 	 CH3SO4NO2 + OH = CH3SO2O2 + HNO3 : 	3.60D-13 	;
{3218.} 	 OH + HO13C4NO3 = HO13C3CHO + NO2 : 	7.29D-12 	;
{3219.} 	 HO13C4O = HOC2H4CHO + HCHO + HO2 : 	2.00D+14*EXP(-5538/TEMP) 	;
{3220.} 	 OH + HO13C3CHO = HO13C3CO3 : 	3.19D-11 	;
{3221.} 	 NO3 + HO13C3CHO = HO13C3CO3 + HNO3 : 	KNO3AL*4.0 	;
{3222.} 	 HO13C3CHO = HOC2H4CHO + CO + HO2 + HO2 : 	J(15) 	;
{3223.} 	 OH + HO13C4OH = HO13C3CHO + HO2 : 	2.01D-11 	;
{3224.} 	 OH + HO13C4OOH = HO13C4O2 : 	1.90D-12*EXP(190/TEMP) 	;
{3225.} 	 OH + HO13C4OOH = HO13C3CHO + OH : 	2.56D-11 	;
{3226.} 	 HO13C4OOH = HO13C4O + OH : 	J(41) 	;
{3227.} 	 CO23C4CO3 = BIACETO2 : 	1.00D-11*RO2 	;
{3228.} 	 CO23C4CO3 + NO = BIACETO2 + NO2 : 	KAPNO 	;
{3229.} 	 CO23C4CO3 + NO2 = C5PAN9 : 	KFPAN 	;
{3230.} 	 CO23C4CO3 + HO2 = CO23C4CO3H : 	KAPHO2 	;
{3231.} 	 CO23C4CO3 + NO3 = BIACETO2 + NO2 : 	KRO2NO3*1.60 	;
{3232.} 	 HCOCH2CO3 = HCOCH2CO2H : 	1.00D-11*0.3*RO2 	;
{3233.} 	 HCOCH2CO3 = HCOCH2O2 : 	1.00D-11*0.7*RO2 	;
{3234.} 	 HCOCH2CO3 + NO = HCOCH2O2 + NO2 : 	KAPNO 	;
{3235.} 	 HCOCH2CO3 + NO2 = C3PAN2 : 	KFPAN 	;
{3236.} 	 HCOCH2CO3 + HO2 = HCOCH2CO3H : 	KAPHO2*0.71 	;
{3237.} 	 HCOCH2CO3 + HO2 = HCOCH2CO2H + O3 : 	KAPHO2*0.29 	;
{3238.} 	 HCOCH2CO3 + NO3 = HCOCH2O2 + NO2 : 	KRO2NO3*1.60 	;
{3239.} 	 C5PAN13 = C42CO3 + NO2 : 	KBPAN 	;
{3240.} 	 OH + C5PAN13 = HOIPRCHO + CO + NO2 : 	9.91D-12 	;
{3241.} 	 OH + C42CO3H = C42CO3 : 	2.36D-11 	;
{3242.} 	 C42CO3H = HOIPRCHO + HO2 + OH : 	J(41) 	;
{3243.} 	 C5PAN12 = H13C43CO3 + NO2 : 	KBPAN 	;
{3244.} 	 OH + C5PAN12 = MEKAOH + CO + NO2 : 	9.14D-12 	;
{3245.} 	 OH + H13C43CO3H = H13C43CO3 : 	1.27D-11 	;
{3246.} 	 H13C43CO3H = MEKAOH + HO2 + OH : 	J(41) 	;
{3247.} 	 C62O = MGLYOX + CO + CH3CO3 : 	KDEC 	;
{3248.} 	 OH + C62OOH = C62O2 : 	1.30D-11 	;
{3249.} 	 C62OOH = C62O + OH : 	J(41)+J(22) 	;
{3250.} 	 C62OOH = CH3CO3 + CO + MGLYOX + OH : 	J(35) 	;
{3251.} 	 C5CO34CO3 = C5CO23O2 : 	1.00D-11*RO2 	;
{3252.} 	 C5CO34CO3 + NO = C5CO23O2 + NO2 : 	KAPNO 	;
{3253.} 	 C5CO34CO3 + NO2 = C6CO134PAN : 	KFPAN 	;
{3254.} 	 C5CO34CO3 + HO2 = C6CO134OOH : 	KAPHO2 	;
{3255.} 	 C5CO34CO3 + NO3 = C5CO23O2 + NO2 : 	KRO2NO3*1.60 	;
{3256.} 	 C5CO2OHPAN = C5CO2OHCO3 + NO2 : 	KBPAN 	;
{3257.} 	 C5CO2OHPAN + OH = HOCOC4DIAL + CO + CO + NO2 : 	7.66D-11 	;
{3258.} 	 C5COOHCO3H + OH = C5CO2OHCO3 : 	8.01D-11 	;
{3259.} 	 C5COOHCO3H = HOCOC4DIAL + HO2 + CO + OH : 	J(41) 	;
{3260.} 	 C4CO2DBCO3 + NO2 = C4CO2DBPAN : 	KFPAN 	;
{3261.} 	 C4CO2DBCO3 + HO2 = C4CO2DCO3H : 	KAPHO2 	;
{3262.} 	 C4CO2DBCO3 = HO2 + CO + C33CO : 	1.00D-11*RO2 	;
{3263.} 	 C4CO2DBCO3 + NO = HO2 + CO + C33CO + NO2 : 	KAPNO 	;
{3264.} 	 C4CO2DBCO3 + NO3 = HO2 + CO + C33CO + NO2 : 	KRO2NO3*1.60 	;
{3265.} 	 NC4DCO2 = MALANHY + NO2 : 	KDEC 	;
{3266.} 	 ACCOMECO3H + OH = ACCOMECO3 : 	3.59D-12 	;
{3267.} 	 ACCOMECO3H = MECOACETO2 + OH : 	J(41) 	;
{3268.} 	 ACCOMEPAN = ACCOMECO3 + NO2 : 	KBPAN 	;
{3269.} 	 ACCOMEPAN + OH = METACETHO + CO + CO + NO2 : 	1.00D-14 	;
{3270.} 	 MMALANHYO = CO2H3CO3 : 	KDEC 	;
{3271.} 	 MMALNHY2OH + OH = MMALANHYO : 	1.34D-11 	;
{3272.} 	 MMALNHYOOH = MMALANHYO + OH : 	J(41) 	;
{3273.} 	 MMALNHYOOH + OH = MMALANHYO2 : 	1.69D-11 	;
{3274.} 	 CH3COPAN = CH3COCO3 + NO2 : 	KBPAN 	;
{3275.} 	 CH3COPAN + OH = HCHO + CO + CO + NO2 : 	1.02D-13 	;
{3276.} 	 C23O3CCO3 = C23O3CCO2H : 	1.00D-11*RO2*0.3 	;
{3277.} 	 C23O3CCO3 = MCOCOMOXO2 : 	1.00D-11*RO2*0.7 	;
{3278.} 	 C23O3CCO3 + HO2 = C23O3CCO2H + O3 : 	KAPHO2*0.29 	;
{3279.} 	 C23O3CCO3 + HO2 = C23O3CCO3H : 	KAPHO2*0.71 	;
{3280.} 	 C23O3CCO3 + NO2 = C23O3CPAN : 	KFPAN 	;
{3281.} 	 C23O3CCO3 + NO = MCOCOMOXO2 + NO2 : 	KAPNO 	;
{3282.} 	 C23O3CCO3 + NO3 = MCOCOMOXO2 + NO2 : 	KRO2NO3*1.60 	;
{3283.} 	 C6CO2OHPAN = C6CO2OHCO3 + NO2 : 	KBPAN 	;
{3284.} 	 C6CO2OHPAN + OH = C5134CO2OH + CO + CO + NO2 : 	8.96D-11 	;
{3285.} 	 C6COOHCO3H + OH = C6CO2OHCO3 : 	9.29D-11 	;
{3286.} 	 C6COOHCO3H = C5134CO2OH + HO2 + CO + OH : 	J(41) 	;
{3287.} 	 C5CO2DBCO3 = CH3CO3 + C33CO : 	1.00D-11*RO2 	;
{3288.} 	 C5CO2DBCO3 + HO2 = C5CO2DCO3H : 	KAPHO2 	;
{3289.} 	 C5CO2DBCO3 + NO2 = C5CO2DBPAN : 	KFPAN 	;
{3290.} 	 C5CO2DBCO3 + NO = CH3CO3 + C33CO + NO2 : 	KAPNO 	;
{3291.} 	 C5CO2DBCO3 + NO3 = CH3CO3 + C33CO + NO2 : 	KRO2NO3*1.60 	;
{3292.} 	 NC4MDCO2 = MMALANHY + NO2 : 	KDEC 	;
{3293.} 	 A2PANOO = C2OHOCO2H : 	1.00E-11*0.3*RO2 	;
{3294.} 	 A2PANOO = A2PANO : 	1.00E-11*0.7*RO2 	;
{3295.} 	 A2PANOO + NO2 = A2PAN : 	KFPAN 	;
{3296.} 	 A2PANOO + HO2 = C2OHOCO2H : 	KAPHO2*0.29 	;
{3297.} 	 A2PANOO + NO = A2PANO + NO2 : 	KAPNO 	;
{3298.} 	 A2PANOO + HO2 = C2OHOCOOH : 	KAPHO2*0.71 	;
{3299.} 	 A2PANOO + NO3 =  A2PANO + NO2 : 	KRO2NO3*1.60 	;
{3300.} 	 OH + NMGLYOX = NO3CH2CO3 + CO : 	1.24D-11 	;
{3301.} 	 NMGLYOX = NO3CH2CO3 + CO + HO2 : 	J(34) 	;
{3302.} 	 NMGLYOX = NO2 + HCHO + CO + CO + HO2 : 	J(53) 	;
{3303.} 	 NO3 + NMGLYOX = NO3CH2CO3 + CO + HNO3 : 	KNO3AL*2.4 	;
{3304.} 	 HO13C3CO3 + NO2 = C4PAN2 : 	KFPAN 	;
{3305.} 	 HO13C3CO3 + HO2 = HO13C3CO3H : 	KAPHO2 	;
{3306.} 	 HO13C3CO3 = HOC2H4CHO + HO2 : 	1.00D-11*RO2 	;
{3307.} 	 HO13C3CO3 + NO = HOC2H4CHO + NO2 + HO2 : 	KAPNO 	;
{3308.} 	 HO13C3CO3 + NO3 = HOC2H4CHO + NO2 + HO2 : 	KRO2NO3*1.60 	;
{3309.} 	 C5PAN9 = CO23C4CO3 + NO2 : 	KBPAN 	;
{3310.} 	 OH + C5PAN9 = CO23C3CHO + CO + NO2 : 	3.12D-13 	;
{3311.} 	 CO23C4CO3H = BIACETO2 + OH : 	J(41)+J(15) 	;
{3312.} 	 OH + CO23C4CO3H = CO23C4CO3 : 	4.23D-12 	;
{3313.} 	 OH + HCOCH2CO2H = HCOCH2O2 : 	2.14D-11 	;
{3314.} 	 HCOCH2CO2H = HCOCH2O2 + HO2 : 	J(15) 	;
{3315.} 	 C3PAN2 = HCOCH2CO3 + NO2 : 	KBPAN 	;
{3316.} 	 OH + C3PAN2 = GLYOX + CO + NO2 : 	2.10D-11 	;
{3317.} 	 OH + HCOCH2CO3H = HCOCH2CO3 : 	2.49D-11 	;
{3318.} 	 HCOCH2CO3H = HCOCH2O2 + OH : 	J(41)+J(15) 	;
{3319.} 	 C5CO23O2 = C5CO23O : 	2.00D-12*RO2 	;
{3320.} 	 C5CO23O2 + NO = C5CO23O + NO2 : 	KRO2NO 	;
{3321.} 	 C5CO23O2 + HO2 = C5CO23OOH : 	KRO2HO2*0.706 	;
{3322.} 	 C5CO23O2 + NO3 = C5CO23O + NO2 : 	KRO2NO3 	;
{3323.} 	 C6CO134PAN = C5CO34CO3 + NO2 : 	KBPAN 	;
{3324.} 	 C6CO134PAN + OH = C5CO23CHO + CO + NO2 : 	1.76D-12 	;
{3325.} 	 C6CO134OOH + OH = C5CO34CO3 : 	5.35D-12 	;
{3326.} 	 C6CO134OOH = C5CO23O2 + OH : 	J(41) 	;
{3327.} 	 C4CO2DBPAN = C4CO2DBCO3 + NO2 : 	KBPAN 	;
{3328.} 	 C4CO2DBPAN + OH = C33CO + CO + NO2 : 	2.74D-11 	;
{3329.} 	 C4CO2DCO3H + OH = C4CO2DBCO3 : 	3.06D-11 	;
{3330.} 	 C4CO2DCO3H = HO2 + CO + C33CO + OH : 	J(41)+J(34) 	;
{3331.} 	 METACETHO + OH = CH3CO3 : 	9.82D-11 	;
{3332.} 	 C23O3CCO2H + OH = MCOCOMOXO2 : 	8.76D-13 	;
{3333.} 	 C23O3CCO3H = OH + MCOCOMOXO2 : 	J(41) 	;
{3334.} 	 C23O3CCO3H + OH = C23O3CCO3 : 	4.34D-12 	;
{3335.} 	 C23O3CPAN + OH = CO + C23O3CHO + NO2 : 	7.36D-13 	;
{3336.} 	 C23O3CPAN = C23O3CCO3 + NO2 : 	KBPAN 	;
{3337.} 	 C5CO2DCO3H + OH = C5CO2DBCO3 : 	3.60D-11 	;
{3338.} 	 C5CO2DCO3H = CH3CO3 + C33CO + OH : 	J(41)+J(34) 	;
{3339.} 	 C5CO2DBPAN = C5CO2DBCO3 + NO2 : 	KBPAN 	;
{3340.} 	 C5CO2DBPAN + OH = C33CO + CH3CHO + NO2 : 	3.28D-11 	;
{3341.} 	 C2OHOCO2H + OH = C3DIOLO2 : 	1.867E-11 	;
{3342.} 	 A2PANO = HOCH2CHO + HO2 : 	KDEC 	;
{3343.} 	 A2PAN = A2PANOO + NO2 : 	KBPAN 	;
{3344.} 	 A2PAN + OH = HOCH2CHO + CO + NO2 : 	1.865E-11 	;
{3345.} 	 C2OHOCOOH = C3DIOLO2 : 	J(41) 	;
{3346.} 	 C2OHOCOOH + OH = A2PANOO : 	1.513E-11 	;
{3347.} 	 C4PAN2 = HO13C3CO3 + NO2 : 	KBPAN 	;
{3348.} 	 OH + C4PAN2 = HOC2H4CHO + CO + NO2 : 	8.22D-12 	;
{3349.} 	 OH + HO13C3CO3H = HO13C3CO3 : 	1.86D-11 	;
{3350.} 	 HO13C3CO3H = HOC2H4CHO + HO2 + OH : 	J(41) 	;
{3351.} 	 C5CO23O = C2H5CO3 + HCHO + CO : 	KDEC 	;
{3352.} 	 C5CO23OOH + OH = C5CO23O2 : 	1.31D-11 	;
{3353.} 	 C5CO23OOH = C5CO23O + OH : 	J(41) 	;
{3354.} 	 C5CO23CHO + OH = C2H5CO3 + CO + CO : 	1.48D-11 	;
{3355.} 	 C5CO23CHO = C2H5CO3 + CO + HO2 + CO : 	J(35) 	;
{3356.} 	 C5CO23CHO = C2H5O2 + CO + CO + HO2 : 	J(34) 	;
{3357.} 	 C23O3CHO + OH = CO + CH3CO3 : 	1.27D-11 	;
{3358.} 	 C23O3CHO = CO + HO2 + CH3CO3 : 	J(22) 	;
{3359.} 	 C23O3CHO + NO3 = CO + CH3CO3 + HNO3 : 	KNO3AL*4.0 	;
{3360.} 	 C3DIOLO2 = C3DIOLO : 	2.00D-12*RO2 	;
{3361.} 	 C3DIOLO2 + NO = C3DIOLO + NO2 : 	KRO2NO 	;
{3362.} 	 C3DIOLO2 + HO2 = C3DIOLOOH : 	KRO2HO2*0.520 	;
{3363.} 	 C3DIOLO2 + NO3 = C3DIOLO + NO2 : 	KRO2NO3 	;
{3364.} 	 C3DIOLO = HOCH2CHO + HCHO + HO2 : 	KDEC 	;
{3365.} 	 C3DIOLOOH + OH = C3DIOLO2 : 	2.78D-11 	;
{3366.} 	 C3DIOLOOH = C3DIOLO + OH : 	J(41) 	;
